# Supplementary material for: Urinary Protein-Biomarkers Reliably Indicate Very Early Kidney Damage in Children With Alport Syndrome Independently of Albuminuria and Inflammation
Source: PubMed Central journal article supplement — Kidney Int Rep. 2023 Sep 29;8(12):2778–93. doi: 10.1016/j.ekir.2023.09.028 (PMC10719601; doi:10.1016/j.ekir.2023.09.028), 2023-09-29
Supplement: mmc1.pdf [file mmc1.pdf]

## SUPPLEMENTARY MATERIAL

### Supplementary Methods

#### Native pre-fractionation of sample pools

For sample preparation before mass spectrometry, our pre-fractionation workflow combined native size exclusion (SEC, first dimension, 1D), followed by native anion exchange (AEC, 2D) chromatography<sup>21</sup>. Briefly, each sample pool was 1D-separated on a HiLoad Superdex™ 200 column controlled by an Äkta purifier™ system (GE Healthcare) at a flow rate of 1 ml/min and at 17 °C. After the void volume, 96 1D-fractions of 600 µl were collected into chilled 96-deepwell microplates (Supplementary Figure S1). After serial 1D-fractionation, all further procedures were performed in microplate format. Thus, beginning with 2D-fractionation, parallelization and automation was achieved for separation, spectrophotometric readout, picking, medium exchange, digest, desalting, and finally storage within the autosampler for LC-MS. 2D-fractionation of all four samples was done simultaneously on four AEC column arrays<sup>21</sup> consisting of 96 micro columns packed with 100 µl Toyopearl DEAE-650M (Tosoh Bioscience). Thus 4128 2D-sub-fractions were generated from each sample pool (Supplementary Figure S2). Within this 2D-matrix the distribution of plasma proteins showed chromatographic spots similar to 2D-PAGE, each with a characteristic native molecular weight and net charge (Supplementary Figure S3). The sub-fractions produced were not entirely mass spectrometric analyzed. The chromatographic distribution of each constituent can be expected within at least nine adjacent sub-fractions. Thus, it is reasonable that we picked only every other sub-fraction (chessboard like) out of the chromatographic spots selected (Supplementary Figure S2). Moreover, due to sensitivity requirements, we selected such sub-fractions with a total protein concentration of >0.03mg/ml (at least in one out of the four corresponding homologous sub-fractions of all four samples). Thereby, each constituent was always identified in at least 3 sub-fractions (e.g. Supplementary Figures S4 to S8). We selected 655 2D-sub-fractions from each sample. These 4 x 655 sub-fractions represent a corresponding set, i.e., they are picked from identical locations after 2D-fractionation of the four sample pools (AM, NM, CF, NF). Corresponding homologous sub-fractions (same location after 2D-separation) out of all four samples were closely placed on the same microplate and thus could be further processed practically simultaneously.

#### Protease digestion and mass spectrometry

After digest by Trypsin/LysC (enzyme:protein, 1:40, V5072, Promega, Fitchburg, WI, USA), the LC-MS analysis was performed by a Hypersil Gold UHPLC column (1.9 µm, 50×1.0 mm) with an Accela 1250 UHPLC system (both Thermo Fisher Scientific) using binary gradient elution. Tandem mass spectrometry (MS/MS) measurements were carried out (2017 to 2019) on a LTQ Orbitrap Discovery (Thermo Fisher Scientific) by positive heated electrospray ionization (H-ESI). The MS/MS system operated in data-dependent TOP10 mode using 1 microscan. The LC-MS/MS operated via graphical interface of the Xcalibur software 2.1. All sub-fractions were run in duplicate. Human transferrin (holo, SERVA Electrophoresis GmbH, 36756) was simultaneously digested and run with each microplate for quality control.

#### Data analysis

Raw spectra were analyzed with Proteome Discoverer® 1.3 and Sequest database search algorithm applying a false discovery rate of <0.5% as described previously<sup>19</sup> and the UniProt database of ~47,800 canine entries (date: 10/26/2017). Data of corresponding homologous sub-fractions from

affected and unaffected animals were compared with Sieve 2.0<sup>®</sup>, separately for males (AM versus NM) and females (CF versus NF).

### **Extraction of BM candidates from mass spectrometric data**

Thus, three cases of alteration were considered for selection of BMs from the list of altered proteins:

1) One cluster or multiple exclusively synergistic clusters with increased protein concentration in affected animals with a mean ratio > 2.0 (Sieve<sup>®</sup>). 2) One or multiple synergistic clusters with increased protein concentration with a mean ratio >5.0, even though other clusters were present. 3) For miscellaneous clusters, an estimated “overall trend” >2.0 based on Formula 1, which identified increased and reduced clusters to estimate a value of global alteration of the protein family (cf. Figure 2). By using “overall trend”, the mostly co-existing unaltered forms of a protein family were not included, i.e. proteoforms which showed ratios in the range of ~1.0 (0.51-1.9). However, their presence in a sample might obscure alterations detectable using currently available ELISAs.

$$\text{Overall trend} = (M_i * H_i) / (H_d / M_d) \quad \text{Formula 1}$$

M<sub>i</sub>: mean of all ratios >2 (higher concentration in affected animals in comparison to controls)

H<sub>i</sub>: counts of all hits of sub-fractions of ratios >2

M<sub>d</sub>: mean of all ratios <0.5 (lower concentration in affected animals in comparison to controls)

H<sub>d</sub>: counts of all hits of sub-fractions of ratios <0.5

### **Analysis of posttranslational modification (PTM)**

The search for PTM ran successively using Proteome Discoverer<sup>®</sup> 1.3 (Thermo)<sup>21</sup> with no more than three dynamic modification types per run. We considered only database matches with high confidence when the sequence coverage was >40% and peptide spectrum match (PSM) was >100. The following dynamic modifications of amino acids were analyzed: deamidation (N, Q, R) and carbamoyl (K, M, R). Multi reports of the related replicates were utilized.

Mean values of the modification rates, #PTM/PSM of albumin and transferrin peptides were determined including the homologous sub-fractions from all animals AM, NM, CF, and NF (cf. Supplementary Figures S10, S11) having database matches with high confidence.

## Supplementary results

### Proteomic search in blood plasma from AS-dogs

#### Global protein distribution after pre-fractionation

1D-SEC chromatograms of all sample pools were similar (Supplementary Figure S1). The third, albumin-containing peaks are nearly identical in all samples whereas the first peak, mainly containing lipoproteins, is slightly lower in NM in comparison to all others. After 2D-AEC the global protein distribution is shown exemplarily in Supplementary Figure S2. The high precision of our protein pre-fractionation<sup>21</sup> enabled reliable comparison of the constituents of sub-fractions from different samples.

#### Proteome comparison

By mass spectrometry altogether 3115 (443) protein chains were identified with the Proteome Discoverer<sup>®</sup> supported by  $\geq 1$  ( $\geq 2$ ) peptide/s, respectively (Supplementary Table S2). Moreover, by Sieve<sup>®</sup> 918 protein chains were identified by  $\geq 2$  counts and  $\geq 5$  hits (Supplementary Table S3) resulting in  $\sim 600$  and  $\sim 300$  non-redundant proteins. Aside from counts, their allocation in native sub-fractions is informative. The majority of proteins showed several chromatographic clusters (spots) indicating the existence of diverse proteoforms with different degrees and direction of alteration in AS and only a few were uniformly increased or decreased in affected in comparison to unaffected dogs (Supplementary Figures S3, S4-S7 and Table S4). In the strict sense only heavily altered proteoforms represent BM candidates. Ideally, further application mandatory should use selective measurements of the very increased proteoform (protein variant). However, since the molecular characteristics of these variants are unknown we had to select proteins of high probability to be BM candidates as well as being measurable by currently available ELISA which are mostly not specific for variants. For the assessment of early pathogenesis, both directions of alteration (increase or decrease) of a given protein are similarly valuable. However, for the aimed analytical purposes here, only proteins that were higher in affected animals than in controls were considered.

#### Posttranslational modifications (PTM)

**Albumin** concentration is not altered in early AS. Several main clusters identified by Proteome Discoverer<sup>®</sup> appear not different to healthy controls (Supplementary Figures S1, S3), some minor clusters (#1 and #7 in Supplementary Figure S7) showed lower or higher protein levels. The main and unaltered fractions exhibit uniformly low deamidation rates. Contrarily, the minor clusters, which are higher in AS based on mass spectrometric quantified protein level, exhibit a manifold rate of deamidations (Supplementary Figure S7 D, E). The minor cluster 1 occurred only in male dogs with AS. Notably, in the minor clusters 1 and 7 as well as in the main clusters 2 and 4, the rate of carbamylation is higher in AS in comparison to healthy controls. Thus, this modification appears increased in early AS in minor parts of albumin in accordance with our preliminary results<sup>21</sup>. Cluster 8 shows remarkably high deamidation rates but no carbamylation.

**Transferrin** showed a main cluster (#4 in Supplementary Figure S8) slightly lower in AS compared with unaffected animals, and several minor clusters. The main cluster exhibited a low deamidation rate, close to the values of the main albumin forms (see above). Like albumin, the minor and altered clusters of transferrin showed manifold deamidation rates in dogs with AS. In contrast to albumin and transferrin-cluster 4, the two decreased transferrin clusters 3 and 5 are more Q- and R-

deaminated (mean ~2.2-fold each) in affected dogs in comparison to healthy controls of both genders. Carbamoylation was always lower than 0.01/PSM.

### **Correlation of BM concentrations measured by ELISA with other clinical parameters**

To identify the presence of relationships with individual and clinical parameters that must be considered in clinical practice, and to reveal the surplus of our BM over common parameters, we correlated our BM with these parameters.

**Albuminuria (UACR)** did not correlate with any of our analyzed BM candidates in blood or urine, except for urinary lumican (Supplementary Table S6). Moreover, urinary lumican at the first visit also correlated with UACR at the second visit (~4 years later). These correlations are mainly due to a few high UACR values in patients with intermediate severity. There was no relation of any of our analyzed BM candidates (in blood and urine) with evidence of late kidney failure, (eGFR, cGFR, SCrea, Supplementary Tables S7, S8), nor inflammation (serum CRP, Supplementary Table S6). Here two high values of CRP, although in the normal range (< 2µg/ml), determine a somewhat moderate correlation.

In our control group, no BM candidate (in blood or urine) correlated with the body mass index (**BMI**) (Supplementary Table S9). The majority of our BM candidates did not correlate with **age** with the exception of *serum* angiotensinogen and C1q (Supplementary Table S9). Thus, there does not appear to be a need for age- and BMI-related cutoffs for any of the promising *urinary* BM.

## Supplementary Figures

### Figure S1:

#### Chromatograms of dog serum proteins after native size exclusion chromatography (1D-SEC)

Four sample pools have been separated, non-affected males (NM), affected males (AM), non-affected females (NF), and carrier females (CF). Each sample pool was separated on a HiLoad Superdex™ 200 column controlled by an Äkta purifier™ system (GE Healthcare) at a flow rate of 1 ml/min and at 17 °C. After the void volume, 96 1D-fractions of 600 µl were collected into chilled 96-deepwell microplates. Column calibration<sup>21</sup>. Aliquots of 150 µl were read at 280 nm (SpectraMAX384PLUS, Molecular Devices). Protein concentrations were calculated using BSA as standard. Section of all proteins above 30 kDa.

### Figure S2:

#### Global protein distribution after anion exchange chromatography (2D-AEC)

Example: entire 2D-sub-fractions from one sample pool (NM).

First column: number of 1D-fraction (cf. Figure S1); last column: molecular weight according column calibration.

First line: number of 2D-sub-fraction; second line: designation of the solvent, i.e. sample and the concentration of NaCl in the elution solvent 10mM Tris-HCl.

Frames indicate selected fractions for mass spectrometric analysis.

Total fractional concentrations of proteins were calculated from A280 using BSA as standard. Protein concentrations are given by values (mg/mL) and color code.

### Figure S3:

#### Distribution of two examples of plasma proteins from NM after 2D-AEC

Please enlarge to more than 400%.

Albumin (upper part, P49822) and α<sub>2</sub>-macroglobulin (lower part, F6UME0).

Results after analysis by the Proteome Discoverer<sup>®</sup> with the following quantifiers:

A, area; P, PSM; C, coverage. Red intensity code is given for A and P;

Grey: Mass spectrometric analyzed 2D-fractions; empty: without any peptide of the respective protein; frames: these sub-fractions were analyzed for PTM.

### Figure S4:

#### Distribution of serum amyloid after 2D-AEC and mass spectrometry identification of its peptides as example of a uniformly altered protein

The section of 2D-fractions containing serum amyloid peptides is shown. Numbers of 1D- (first column) and 2D-fractions (first line) as in Figure S3. Grey: Mass spectrometric analyzed 2D-fraction.

R: ratio calculated by Sieve<sup>®</sup> corresponding to the concentration quotient; P: peptide counts; H: hits.

Green figures: Protein signals strongly higher in AM compared to NM. Green highlighting indicate chromatographic clusters. Due to its peptide sequence, the protein is small (~12 kDa). Contrarily, it was found in two high molecular weight clusters. In both clusters, the concentration of this protein are much higher in AM than in NM.

**Figure S5:****Distribution of  $\alpha$ 1B-glycoprotein after 2D-AEC and mass spectrometric identification of its peptides as example of a protein with several proteoforms with different degrees and direction of alteration under AS**

The section of 2D-fractions containing  $\alpha$ 1B-glycoprotein peptides is shown. Numbers of 1D- (first column) and 2D-fractions (first line) as in Figure S3. Grey: Mass spectrometric analyzed 2D-fraction. Frames illustrate chromatographic clusters.

R: ratio calculated by Sieve<sup>®</sup> corresponding to the concentration quotient; P: peptide counts; H: hits.

Green figures: Protein signals strongly higher in AM compared to NM. Green highlighting: chromatographic cluster with higher concentrations in AM.

Red figures: Protein signals strongly lower in AM compared to NM. Yellow highlighting: chromatographic cluster with lower concentrations in AM.

Black figures: Protein signals are similar in AM and NM, i.e. not altered under disease.

**Figure S6:****Distribution of gelsolin after 2D-AEC and mass spectrometric identification of its peptides as example of a second protein with several proteoforms with different degrees and direction of alteration under AS**

For explanation, cf. Legend to Figure S5.

**Figure S7:****Distribution of BM candidates adiponectin and the complement component C1q after 2D-AEC and mass spectrometric comparison of their peptides in AM to NM**

The section of 2D-fractions containing peptides from adiponectin and the tree chains from C1q are shown as indicated.

Numbers of 1D- (first column) and 2D-fractions (first line) as in Figure S3. Grey: Mass spectrometric analyzed 2D-fraction. Frames illustrate chromatographic clusters. For further explanation, cf. Legend to Figure S5.

These protein chains showed at least two proteoforms with different degrees and direction of alteration under AS. The clusters lower under AS of both proteins were found in similar sub-fraction as do the clusters higher under AS.

**Figure S8:****Distribution of the BM candidate ColXIII after 2D-AEC and mass spectrometric comparison of its peptides in AM to NM**

The section of 2D-fractions containing peptides from ColXIII is shown.

For further explanation, cf. Fig. S5.

This protein showed a singular cluster higher in AM than NM.

## Figure S9:

### Comparison of the concentrations of BM candidates in serum and urine from patients (set 1 and set 2) and controls

Entire results are given here in box-plots (17 BM candidates each in serum and urine). Second samples were derived about 4 years after the first.

Significance values are given as bars:  $p < 0.05$ , bright blue;  $p < 0.01$  (dark blue); all other not significant. To show tendency:  $0.05 < p < 0.1$  (pale blue).

AS: autosomal or no genetic information; TBMN: thin basement membrane nephropathy; BFH: benign familial hematuria (set 2).

Less severe, intermediate, and severe show data from patients with AS (set 1) of the three severity groups (cf. main text)

First series: biomarker concentrations in **serum** (S)

Second series: biomarker concentrations in **urine** (U)

Abbreviations of biomarker proteins: cf. main text

## Figure S10:

### Proteoforms and PTM of albumin

#### A: Global distribution of plasma protein concentrations after 2D-AEC

Example: NM. Section of sub-fractions containing eight numbered chromatographic clusters of albumin (identified after mass spectrometry). Frames indicate sub-fractions, which form a cluster. Number and color code show the total fractional protein concentration. Black highlighting indicates the sub-fractions analyzed for PTM.

#### B: Mass spectrometric quantifiers of albumin variants after analysis of sample from males (NM) by the Proteome discoverer<sup>®</sup>

Estimated percentage of albumin hits in each framed cluster compared to total hits of albumin in all sub-fractions. The analyzed fractions of the main clusters (2 to 6) contained ~48% of all albumin peptides of the sample.

**B-F:** Grey filling: albumin protein concentration is not altered in AM (ratios around 1.0,  $>0.5 \dots <2.0$ ); red filling: protein concentration is increased in AM in comparison to NM due to the ratios calculated by Sieve<sup>®</sup> (ratios  $>2$ , cf. Fig. C).

#### C: Mass spectrometric comparison of the concentrations of albumin variants from AM and NM determined by Sieve<sup>®</sup>

The quantifier "ratio" indicates the quotient AM/NM of peptide signals and corresponds to the concentration quotient of albumin of homologous sub-fractions. The mean ratio was built from all sub-fractions of one cluster.

The main clusters of albumin (2 to 6) showed ratios of ~1.0. Thus, the protein concentrations of these proteoforms (clusters) are not altered under AS. Contrarily, the minor clusters 1 and 7 were found about six-fold and the cluster 8 even nearly 50-fold increased under AS.

#### D-G: Deamidation and carbamoylation rates of albumin proteoforms

The search for PTM ran successively using Proteome Discoverer<sup>®</sup> 1.3 (Thermo) with no more than three dynamic modification types per run. We considered only highly confident database matches when the sequence coverage was  $>40\%$ . The following dynamic modifications of amino acids were

analyzed: deamidation (N, Q, R) and carbamylation (K, M, R). Multi reports of the related replicates were utilized.

Mean values of the modification rates, #PTM/PSM of albumin peptides were determined including the homologous sub-fractions from all NM, AM, NF, and CF.

In NM the minor clusters (1, 7, 8), which are elevated under AS, showed higher deamidation and lower carbamylation rates than the main clusters. However, carbamylation was significantly increased in minor clusters under AS (Fig. G).

## **Figure S11:**

### **Proteoforms and PTM of transferrin**

#### **A: Global distribution of plasma protein concentrations after 2D-AEC (NM)**

Section of sub-fraction containing seven numbered chromatographic clusters of transferrin. Frames indicate sub-fractions, which form a cluster and analyzed by mass spectrometry. Number and color code show the total fractional protein concentration. Black highlighting indicates the sub-fractions analyzed for PTM (see legend to Supplementary Figure S10).

#### **B: Mass spectrometric quantifiers of transferrin variants after analysis of sample from NM by the Proteome discoverer<sup>®</sup>**

Grey: mass spectrometric analyzed sub-fractions. Figures indicate the presence of transferrin peptides. Quantifiers (second line): A: area (red color code); P: number of peptides (green color code); C: sequence coverage. Frames indicate sub-fractions, which form a cluster and analyzed by mass spectrometry.

#### **C: Mass spectrometric comparison of the concentrations of transferrin variants from AM and NM determined by Sieve<sup>®</sup>**

Grey: mass spectrometric analyzed sub-fractions. Figures indicate the presence of transferrin peptides. The quantifier "ratio" (from  $\gg 1.0$  to  $\ll 1.0$ , color code from red to green) indicate the quotients AM/NM of peptide signals and corresponds to the concentration quotient of transferrin of homologous sub-fractions. P: number of peptides; H: hits. Frames indicate sub-fractions, which form a cluster.

#### **D: Mass spectrometric comparison of the concentrations of transferrin variants from AM and NM determined by the Proteome discoverer<sup>®</sup>**

Estimated percentage of transferrin hits in each framed cluster compared to total hits of transferrin of entire sub-fractions (cf. Fig. C). The analyzed fractions contained ~39% of all transferrin peptides of the sample.

**D-G:** Grey filling: transferrin protein concentration is lower in AM in comparison to NM (ratios  $< 1.0$ ); red filling: protein concentration is higher in AM in comparison to NM due to the ratios calculated by Sieve<sup>®</sup> (ratios  $> 2$ , Fig. E).

The mean ratio was built from all sub-fractions of one cluster.

The main cluster 4 of transferrin (Fig. D) showed a ratio of ~0.6 (Fig. E) like the minor clusters 1, 3, and 6 ( $< 0.5$ ). This is in accordance with the known alteration direction of this APR under inflammation. Surprisingly, there were three minor clusters (2, 5, and 7) 2 to 15-fold increased under AS.



### **F, G: Deamidation rates of transferrin of proteoforms identified**

The search for PTM ran successively using Proteome Discoverer<sup>®</sup> 1.3 (Thermo) with no more than three dynamic modification types per run. We considered only highly confident database matches when the sequence coverage was >40%. The following dynamic modifications of amino acids were analyzed: deamidation (N, Q, R) and carbamoyl (K, M, R). Multi reports of the related replicates were utilized.

Mean values of the modification rates, #PTM/PSM of transferrin peptides were determined including the homologous sub-fractions from all animals AM, NM, CF, and NF (cf. Fig. A-C).

The minor clusters (5, 7), which are elevated under AS, showed much higher deamidation rates than the main cluster and lower clusters under AS. Practically, no carbamoylation was found.

## Supplementary Tables

### Table S1:

#### Specification of ELISA-Test kits applied to dog and human samples

**Measurement in dog samples:** When no dog-specific or reliable kit was available, we applied assays of other species-specificity due to the high sequence similarities. Out of the checked kits those marked by yes (y) produced reliable antigen concentrations. The other kits either were not able to detect the proteoform naturally occurring in our samples or were not sensitive enough.

**Measurement in human samples:** The kits were performed according to the suppliers instructions with the following modifications: all assays from Cloud-Clone and CUSBIO were performed with double incubation times. Samples were pre-incubated with 0.5% Tween 20 before measurement of gelsolin. For the quantification of PICP, TGF- $\beta$ 1, and CRP in urine either incubation times were prolonged or concentrated specimens were applied. For that samples have been concentrated in Amicon<sup>®</sup> Ultra - 15 Centrifugal filters (3K, UFC900324) by ~10 to ~60 fold depending on the starting volume available.

### Table S2:

#### List of protein chains identified by the Proteome Discoverer<sup>®</sup> in four sample pools of blood plasma from dogs

Mass spectrometric data are: Accession number (SwissProt); Description (annotation);  $\Sigma$ Coverage (sequence coverage);  $\Sigma$ # Proteins (number of distinct proteins assigned to the identified sequences);  $\Sigma$ # Unique Peptides (singular peptides assigned to the protein);  $\Sigma$ # Peptides (entire peptide count including repeatedly found peptides);  $\Sigma$ # PSMs.

By mass spectrometry, 3115 (443) proteins in total were identified with the Proteome Discoverer<sup>®</sup> supported by  $\geq 1$  ( $\geq 2$ ) peptide/s, respectively.

### Table S3:

#### List of protein chains identified by the Sieve<sup>®</sup> in four sample pools of blood plasma from dogs

Mass spectrometric data are: Accession Number (SP: SwissProt); Description (annotation); Counts (singular peptides assigned to the protein); Sum Hits (entire peptide count including repeatedly found peptides); Hits/Counts.

Using Sieve<sup>®</sup>, 918 proteins were identified supported by  $\geq 2$  counts and  $\geq 5$  hits resulting in ~600 and ~300 non-redundant protein chains in 2D-sub-fractions.

### Table S4:

#### Mass spectrometric identified biomarker candidates

Mean ratios of AM/NM and CF/NF as well as number hits that determine an altered protein as BM candidate. Calculation of mean ratios, cf. Formula 1 in Supplementary Methods. Here all results are given, proteins and protein clusters appearing higher as well as lower in affected animals.

"DIV/0": division by zero, the ratio cannot be calculated since there was no hit/peptide in the control sample. The number of hits corresponds to protein concentration in sub-fractions included. "1000" was set for an extraordinary high ratio, even when much higher, in order to apply value depending on color code of Excel®.

Figure 2 (main document) represents an excerpt from this table.

#### Table S5:

##### Concentrations of some BM candidates determined by ELISA in dog samples.

ELISA (last column) have been performed according to the supplier's instructions each in duplicate and with different dilutions to meet the measuring range of the respective assay.

n: sample count for all of the line, in parenthesis when different from the value given in 8<sup>th</sup> column. s: serum; p: plasma; u: urine. In urine BM concentrations are normalized by creatinine (c). Sample dilution: <sup>a</sup>1 to 20, <sup>b</sup>1 to 2500. ELISA detects: <sup>c</sup>intact protein, <sup>d</sup>c-terminal fragment.

**Bold:** trend in blood in accordance with proteomic data of distinct clusters, cf. Figure 2; ***bold and italic:*** trend in urine in accordance with the trend in blood. Empty cells: no more samples available.

#### Table S6:

##### Correlation of BM concentrations in urine one with each other's

Correlation analyses were performed by SPSS (v.27). Cells contain the correlation coefficients (upper line) and the p-value (lower line). Significant correlations calculated by this software are indicated by stars and p-values below 0.05. We do not follow these proposals rather considered correlation coefficients of > 0.5 (bright color) as moderately and > 0.6 (dark color) as highly correlating.

Lower left half (blue colors): Correlation analysis according Pearson. Upper right half: analyses according Spearman (green colors).

#### Table S7:

##### Correlation of serum and urinary BM candidates with UACR and serum creatinine in patients with AS and similar diseases

Sample set 1 (first visit) and sample set 2.

Correlation analyses were performed by SPSS (v.27). Cells contain the correlation coefficients (upper line) and the p-value (lower line). Significant correlations calculated by this software are indicated by stars and p-values below 0.05. We do not follow these proposals rather considered correlation coefficients of > 0.5 (bright grey) as moderately and > 0.6 (dark grey) as highly correlating.

**Graphical visualization of correlation considered as significant:** Urinary lumican (ULUM) of first samples of sample set 1 with UACR of first and additional of the second samples

**Table S8:****Correlation of serum and urinary BM candidates with eGFR and cGFR in patients with AS and similar diseases**

Correlation analyses see Table S7.

**Graphical visualization of correlations considered as significant:** Urine CRP with eGFR, and serum PICP and HABP2 with cGFR.

**Table S9:****Correlation of serum and urinary BM candidates with serum CRP in patients with AS and similar diseases.**

Correlation analyses see Table S7.

**Graphical visualization of correlation considered as significant:** Serum complement C1q with serum CRP. First samples.

**Table S10:****ROC analysis, comparison of patients with AS (set1, first visit) with controls**

ROC analysis by SPSS (cf. Methods section). Only BMs with AUC >0.700 are shown.

Concentration ranges of BMs: Serum: ColXIII, HABP2, PICP, TGF- $\beta$ 1 and C1q, ng/mL, GS,  $\mu$ g/mL.

Urine: ColXIII, HABP2, C4BP, CFH, CFI, FGG, GS, LRGP1, a1AGP, and C1q, ng/mg creatinine; CRP, C9 and FMN, pg/mg creatinine.

**Supplementary Reference:**

1. Rhode H, Muckova P, Buchler R, et al. A next generation setup for pre-fractionation of non-denatured proteins reveals diverse albumin proteoforms each carrying several post-translational modifications. *Sci Rep.* Aug 13 2019;9(1):11733. doi:10.1038/s41598-019-48278-y
2. Muckova P, Wendler S, Rubel D, et al. Preclinical Alterations in the Serum of COL(IV)A3(-)/(-) Mice as Early Biomarkers of Alport Syndrome. *J Proteome Res.* Dec 4 2015;14(12):5202-14. doi:10.1021/acs.jproteome.5b00814

**Figure S1:**

Chromatograms of dog serum proteins after native size exclusion chromatography (1D-SEC)

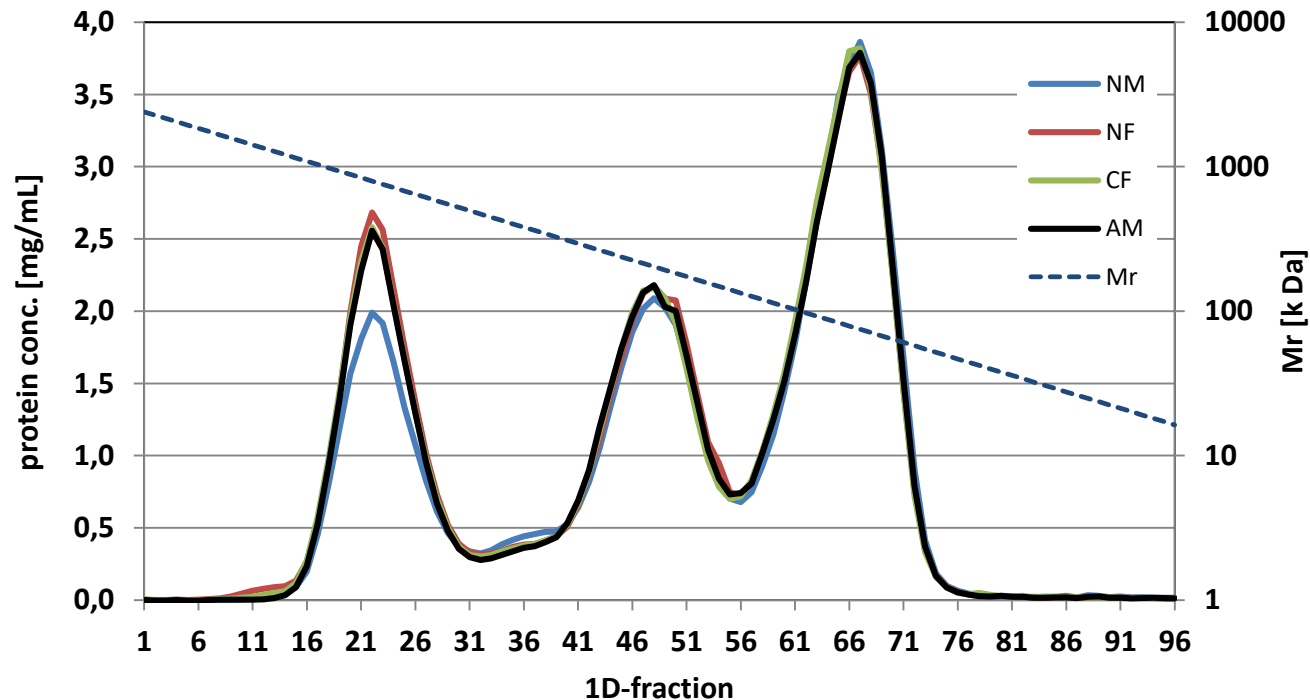

Four sample pools have been separated, non-affected males (NM), affected males (AM), non-affected females (NF), and carrier females (CF). Each sample pool was separated on a HiLoad Superdex™ 200 column controlled by an Äkta purifier™ system (GE Healthcare) at a flow rate of 1 ml/min and at 17 °C. After the void volume, 96 1D-fractions of 600 µl were collected into chilled 96-deepwell microplates. Column calibration<sup>21</sup>. Aliquots of 150 µl were read at 280 nm (SpectraMAX384PLUS, Molecular Devices). Protein concentrations were calculated using BSA as standard. Section of all proteins above 30 kDa.

# Figure S2: Global protein distribution after anion exchange chromatography (2D-AEC)

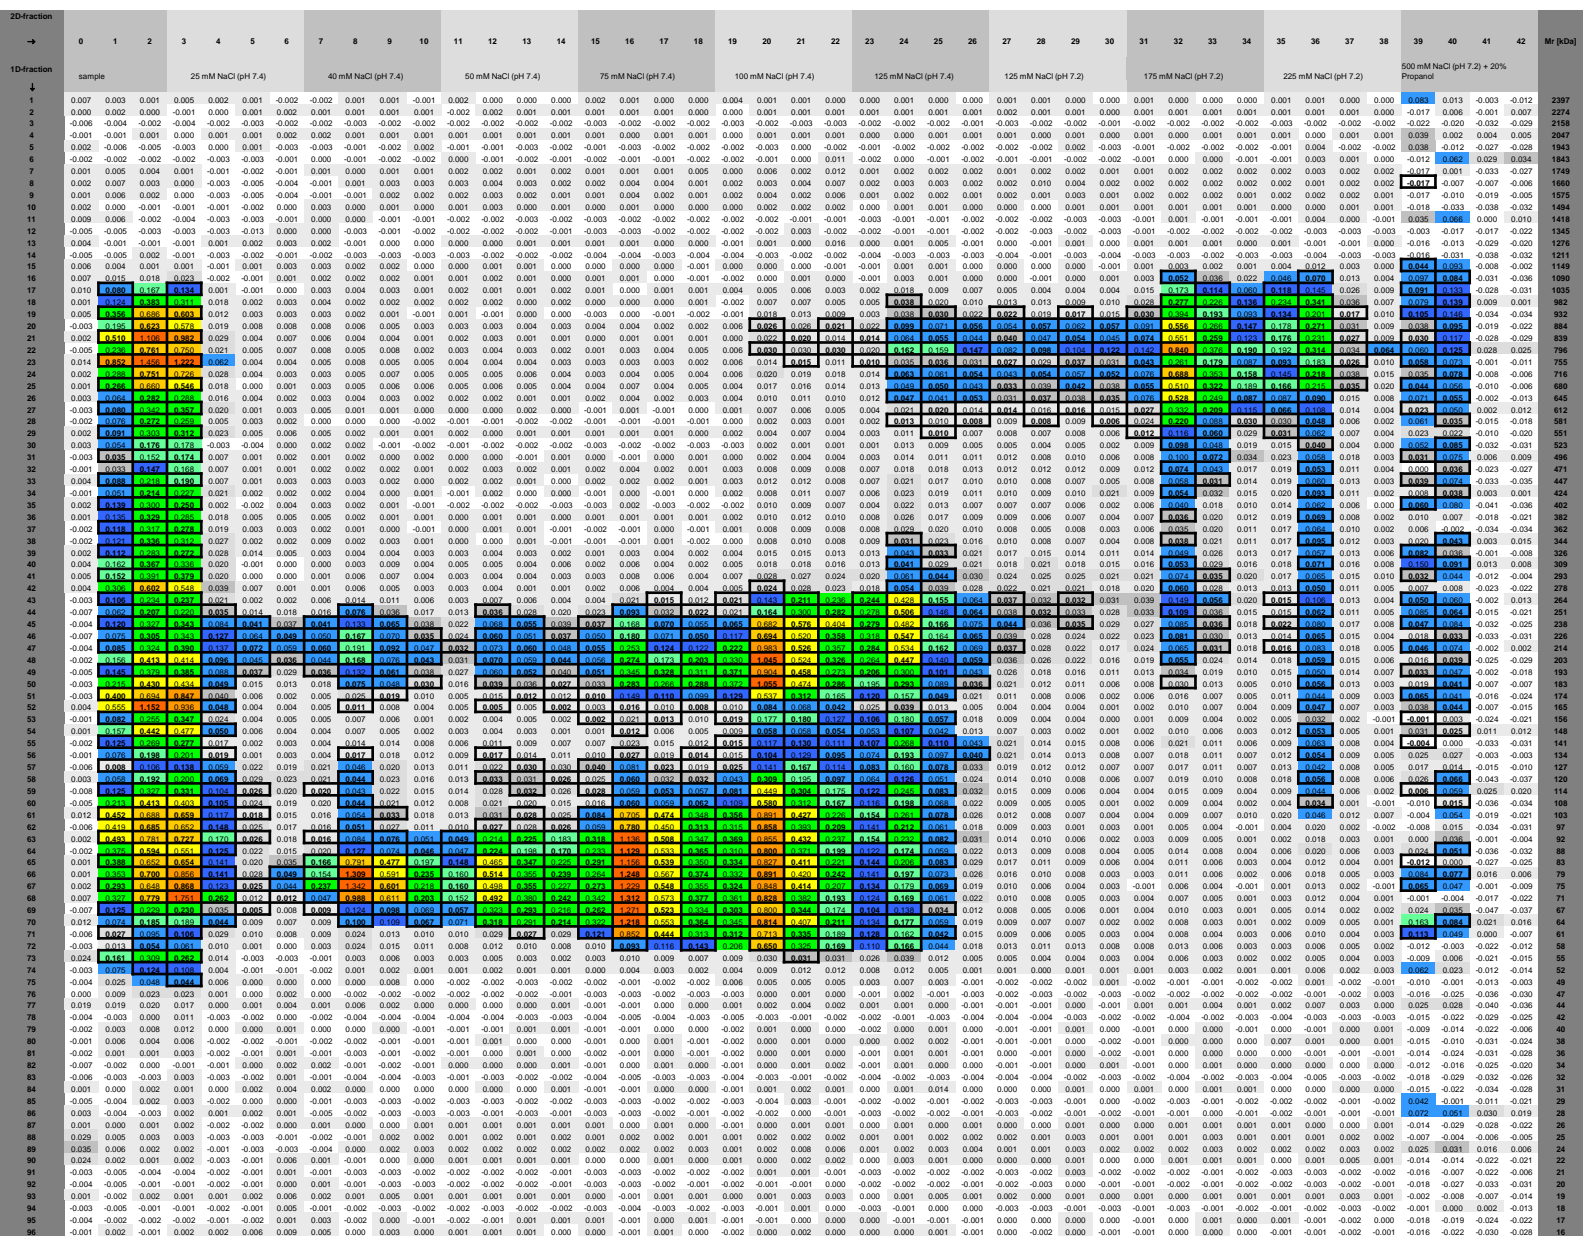

0.00 0.02 0.03 0.04 0.10 0.15 0.20 0.40 0.8 1.0 2.0 3.0  
 0.02 0.03 0.04 0.10 0.15 0.20 0.40 0.8 1.0 2.0 3.0 10.0  
 mg/ml

Example: entire 2D-sub-fractions from one sample pool (NM).

First column: number of 1D-fraction (cf. Figure S1); last column: molecular weight according column calibration.

First line: number of 2D-sub-fraction; second line: designation of the solvent, i.e. sample and the concentration of NaCl in the elution solvent 10mM Tris-HCl.

Frames indicate selected fractions for mass spectrometric analysis.

Total fractional concentrations of proteins were calculated from A280 using BSA as standard. Protein concentrations are given by values (mg/mL) and color code.

**Figure S3: Distribution of two examples of plasma proteins from NM after 2D-AEC**

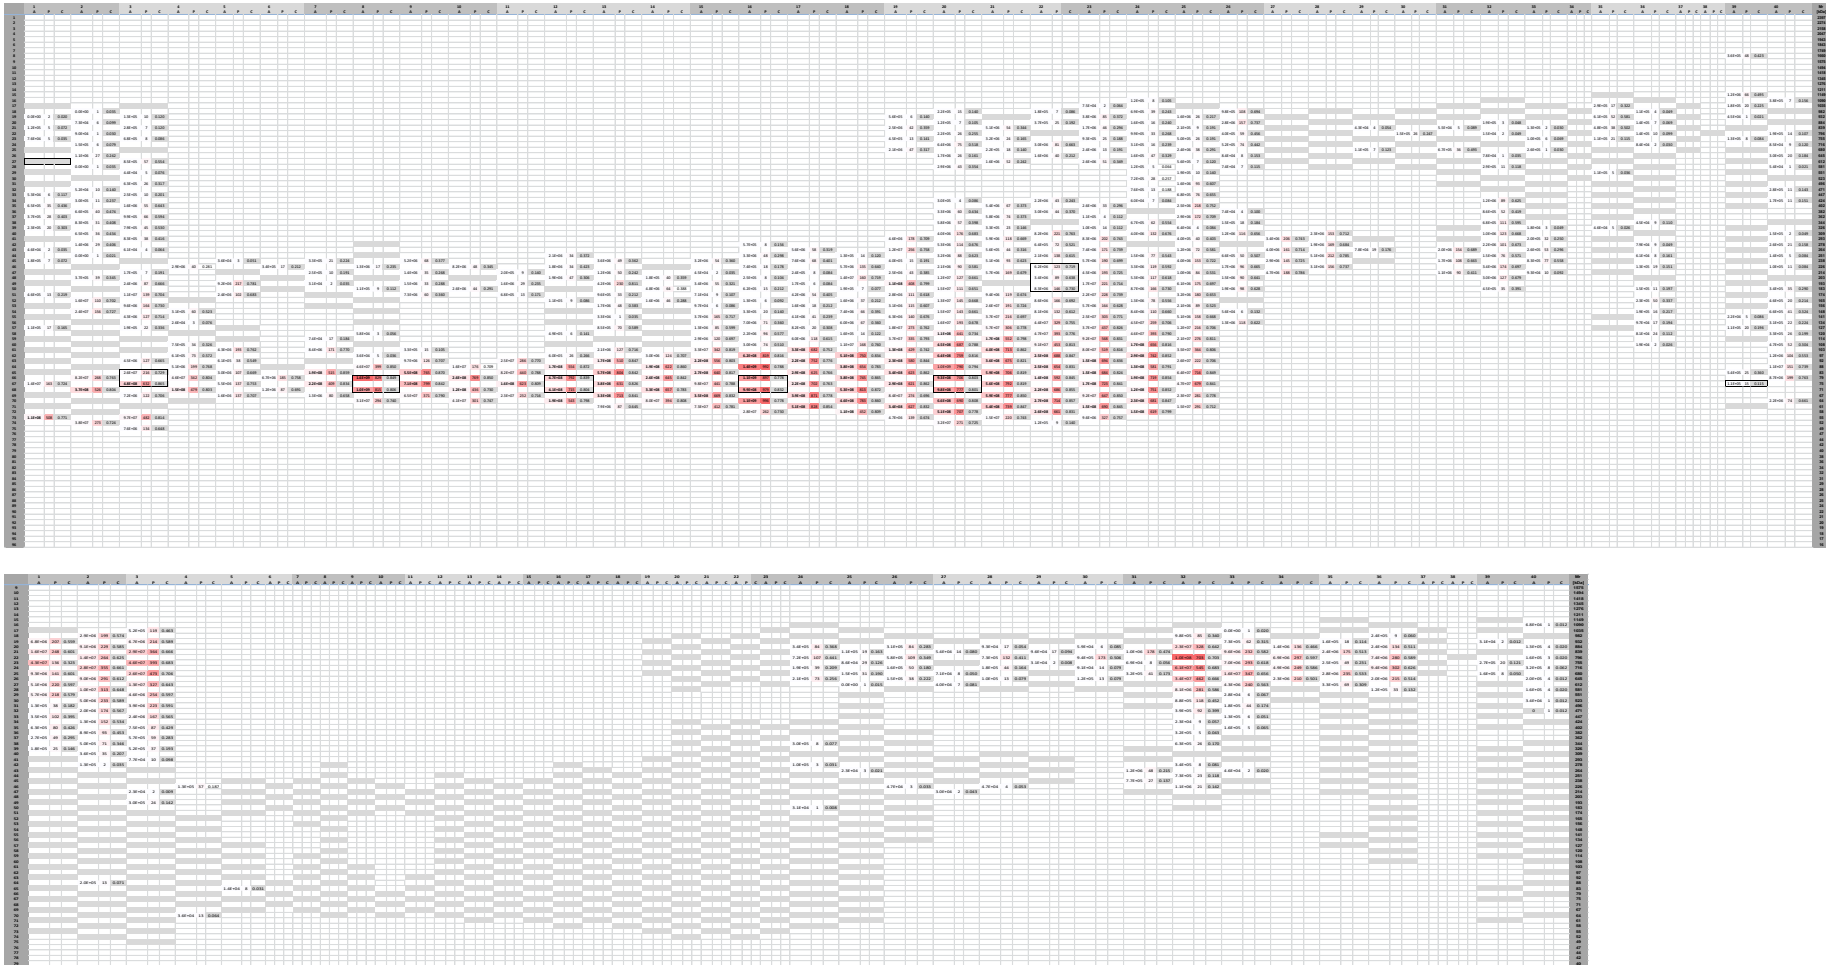

Distribution of two proteins from NM, albumin (**upper part**, P49822) and  $\alpha$ -2-macroglobulin (**lower part**, F6UME0) after 2D-AEC. Results after analysis by the Proteome discoverer with the following quantifiers: A, area; P, PSM; C, coverage. Red intensity code is given for A and P; Grey: MS-analyzed 2D-fractions; empty: without any peptide of the respective protein; frames: these sub-fractions from all four samples have been analyzed for PTM.

Please enlarge to more than 400%.







The section of 2D-fractions containing  $\alpha$ 1B-glycoprotein peptides is shown. Numbers of 1D- (first column) and 2D-fractions (first line) as in Figure S3. Grey: Mass spectrometric analyzed 2D-fraction. Frames illustrate chromatographic clusters.

R: ratio calculated by Sieve<sup>®</sup> corresponding to the concentration quotient; P: peptide counts; H: hits. Green figures: Protein signals strongly higher in AM compared to NM. Green highlighting: chromatographic cluster with higher concentrations in AM.

Red figures: Protein signals strongly lower in AM compared to NM. Yellow highlighting: chromatographic cluster with lower concentrations in AM. Black figures: Protein signals are similar in AM and NM, i.e. not altered under disease.

**Figure S6:**

Distribution of gelsolin after 2D-AEC and mass spectrometric identification of its peptides as example of a second protein with several proteoforms with different degrees and direction of alteration under AS

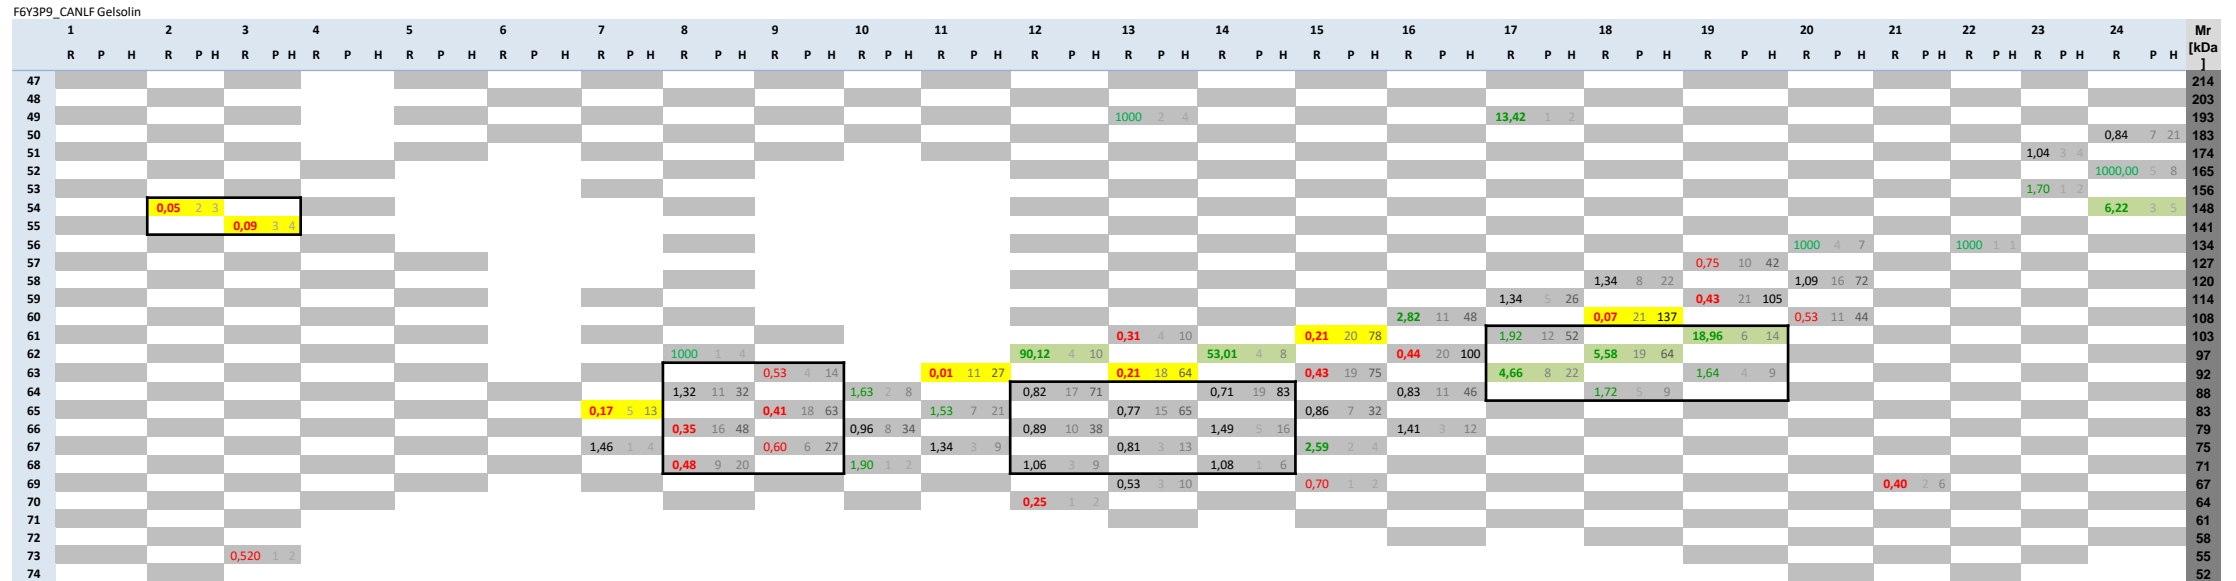

For explanation, cf. Legend to Figure S5.

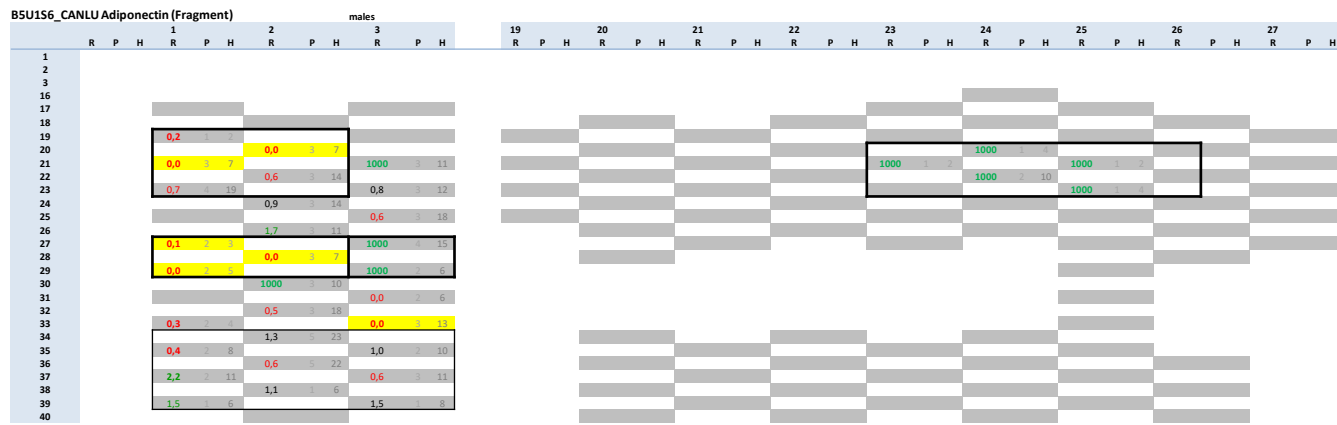

Figure S7:

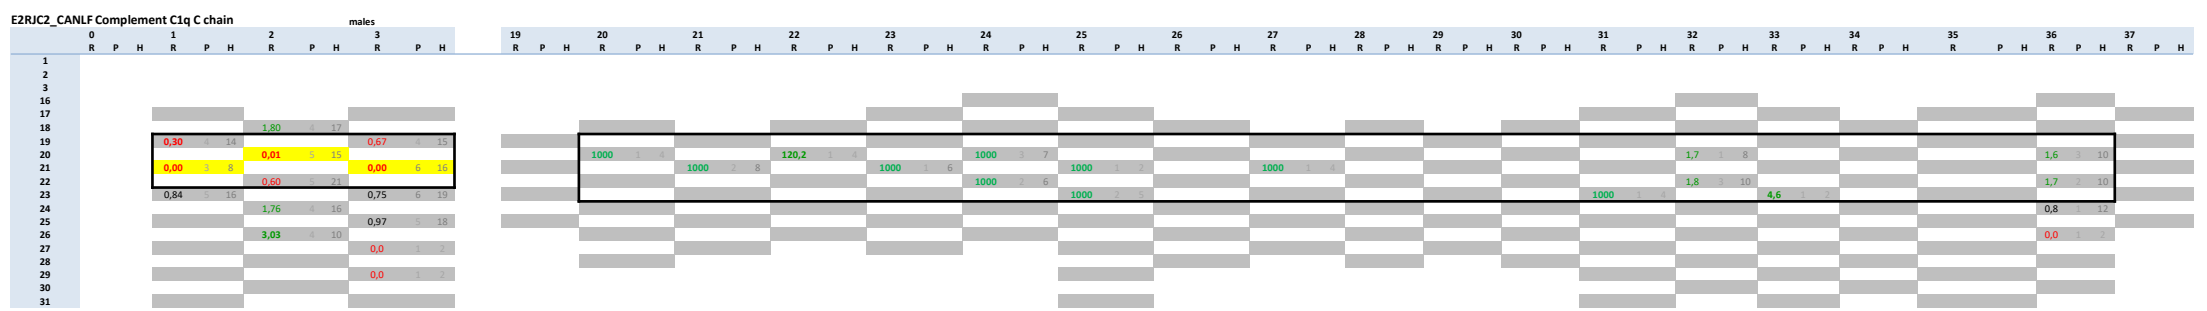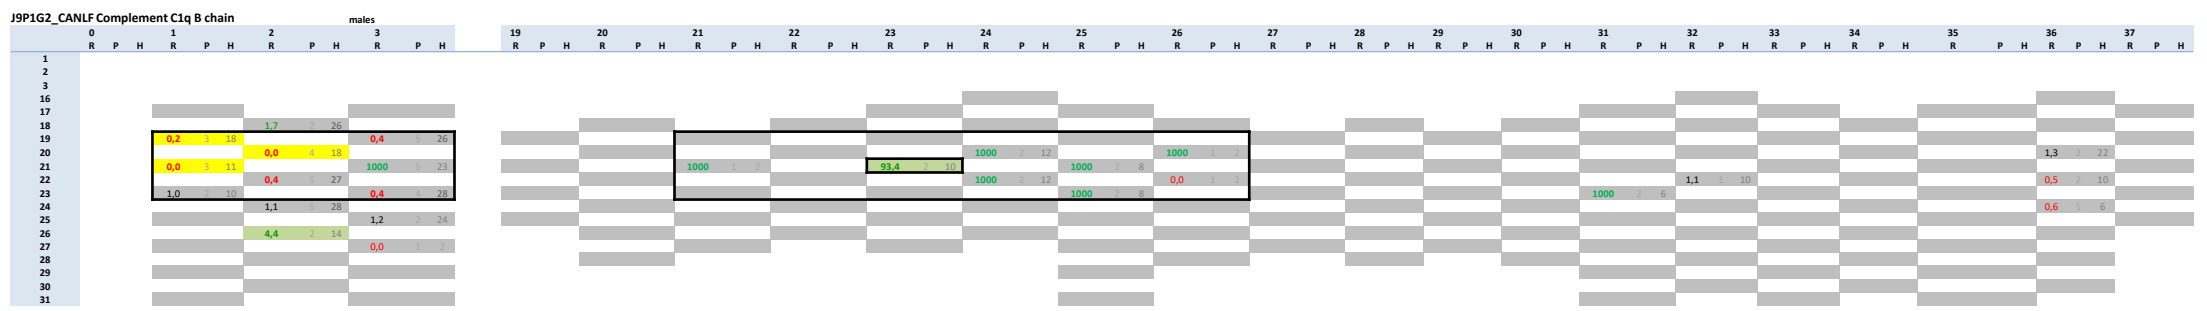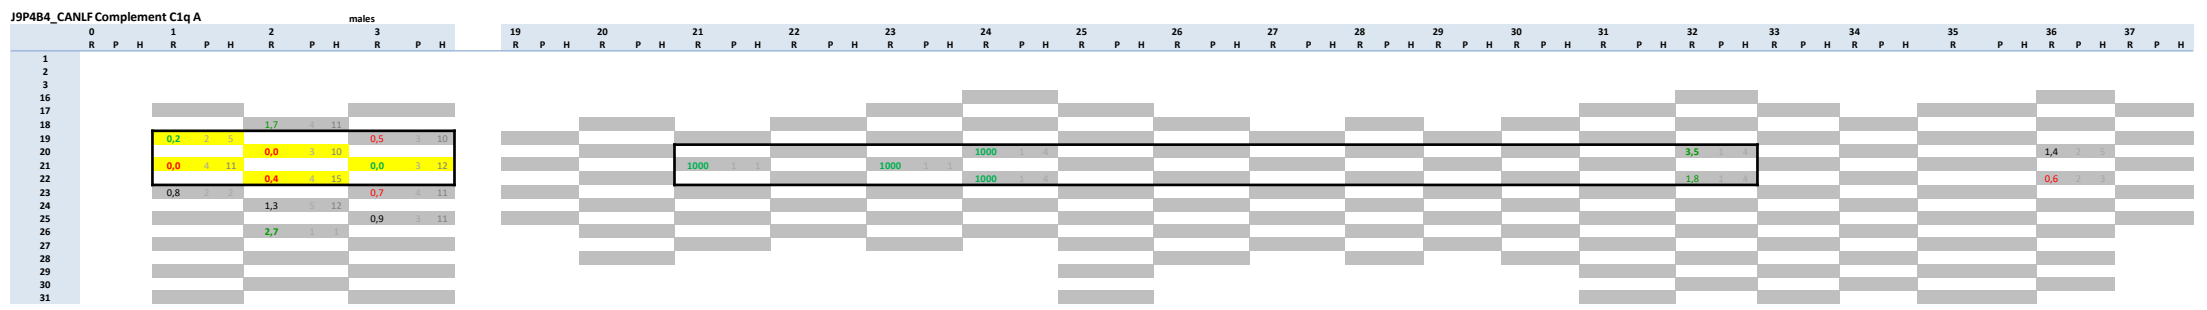

**Figure S7:**

Distribution of BM candidates adiponectin and the complement component C1q after 2D-AEC and mass spectrometric comparison of their peptides in AM to NM

The section of 2D-fractions containing peptides from adiponectin and the tree chains from C1q are shown as indicated.

Numbers of 1D- (first column) and 2D-fractions (first line) as in Figure S3. Grey: Mass spectrometric analyzed 2D-fraction. Frames illustrate chromatographic clusters. For further explanation, cf. Legend to Figure S5.

These protein chains showed at least two proteoforms with different degrees and direction of alteration under AS. The clusters lower under AS of both proteins were found in similar sub-fraction as do the clusters higher under AS.

**Figure S8:**

Distribution of the BM candidate ColXIII after 2D-AEC and mass spectrometric comparison of its peptides in AM to NM

F1PJH3\_CANLF Collagen type XIII alpha 1 chain

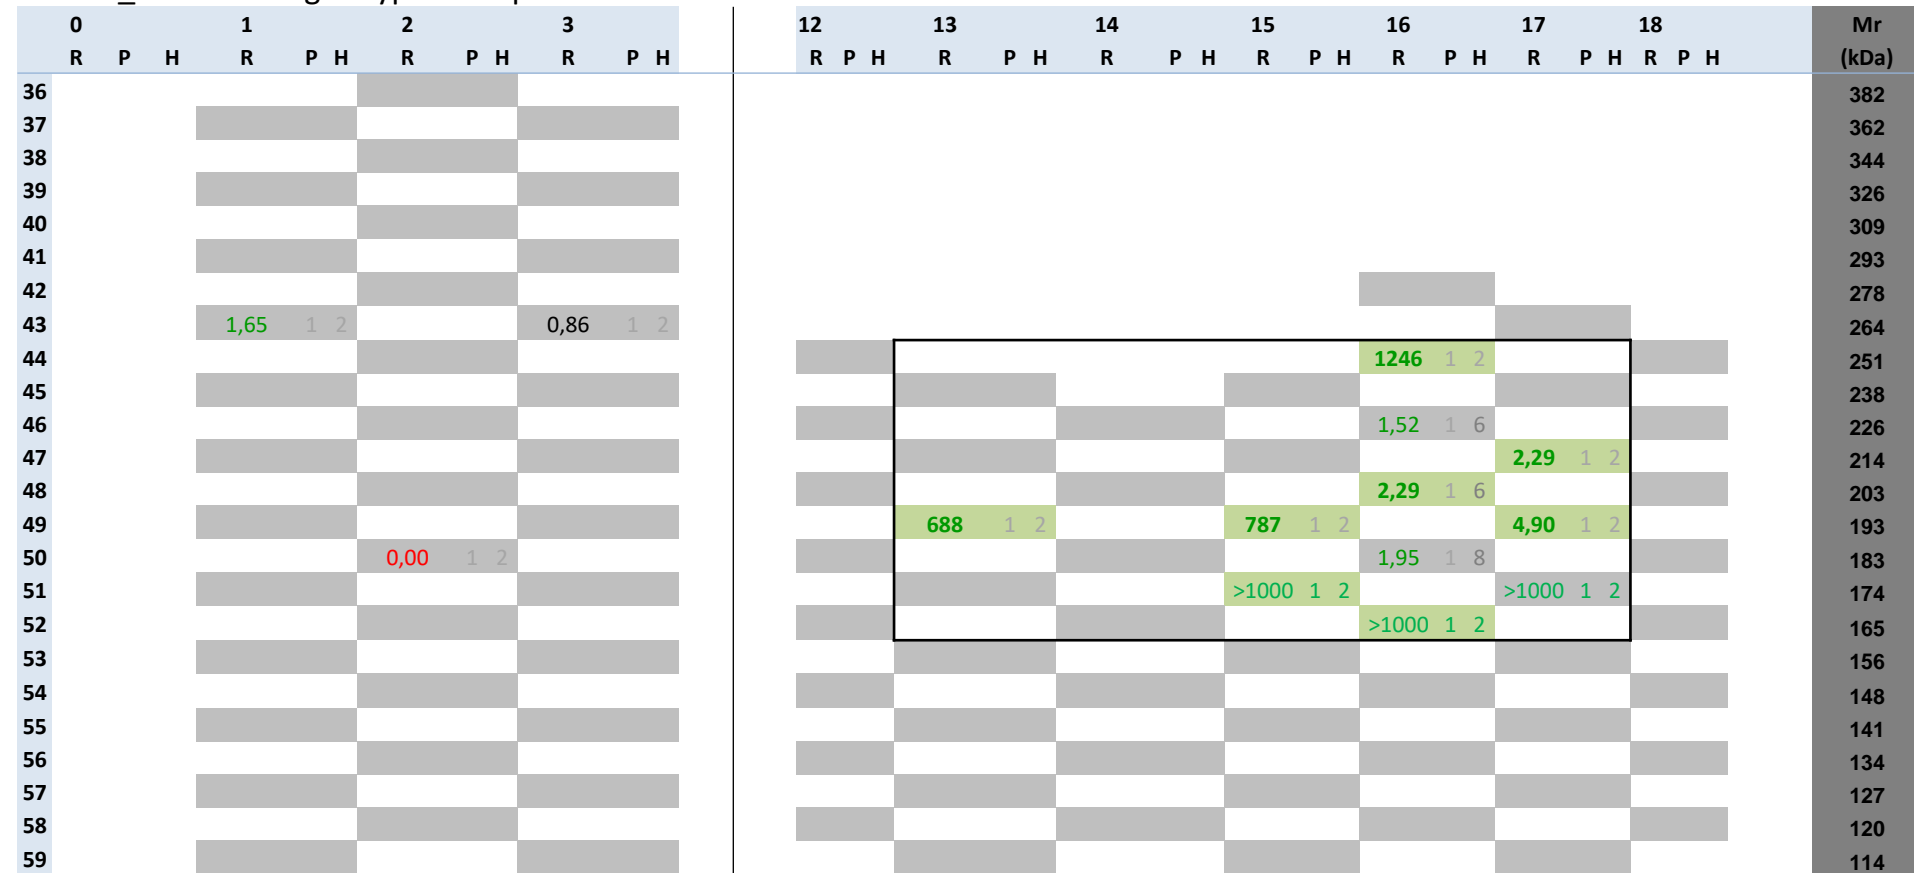

The section of 2D-fractions containing peptides from ColXIII is shown. For further explanation, cf. Figure S5.

This protein showed a singular cluster higher in AM than NM.

## Figure S9

### Entire concentrations biomarker candidates in patients (set 1 and set 2) in comparison to controls

Set 1: less severe, intermediate, and severe show data from patients with X-linked AS of the three severity groups (cf. main text)

Set 2: AS: autosomal or no genetic information; TBMN: thin basement membrane nephropathy; BFH: benign familial hematuria.

First series: biomarker concentrations in **serum** (S)

Second series: biomarker concentrations in **urine** (U)

Abbreviations of biomarker proteins: cf. main text

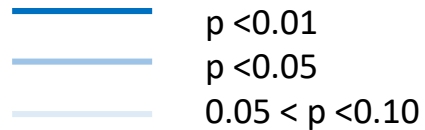



# Serum

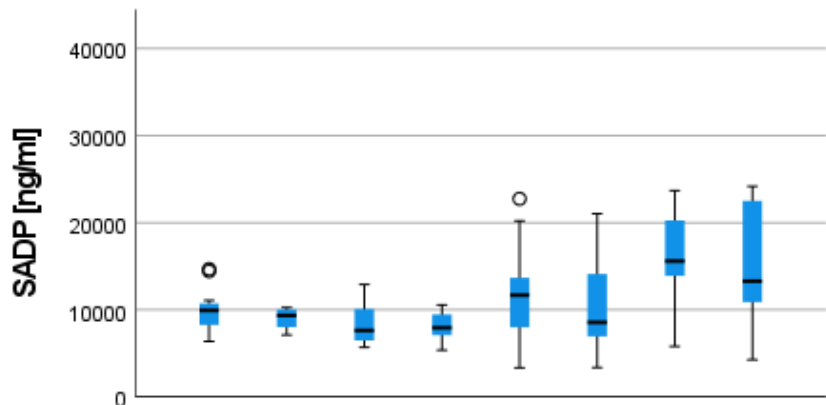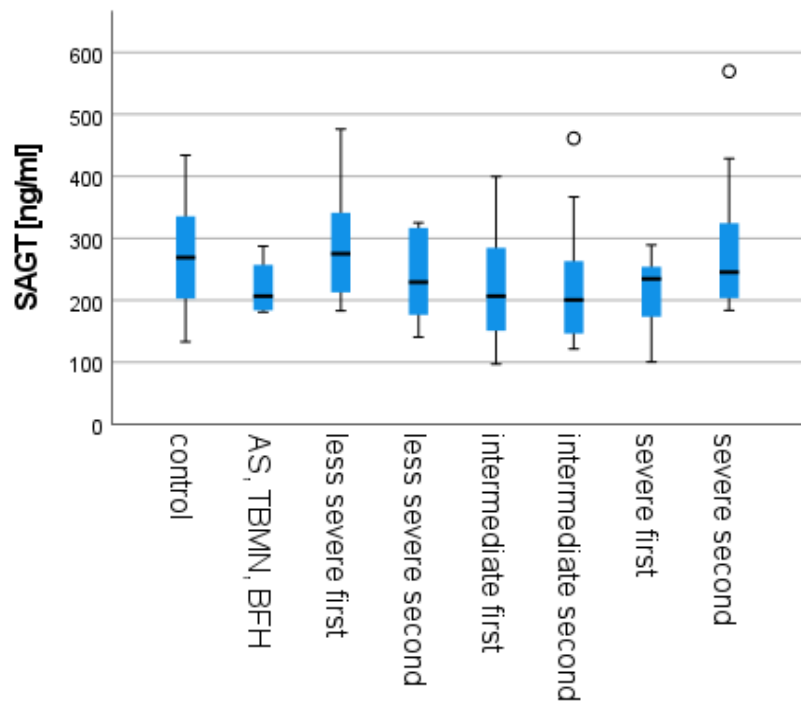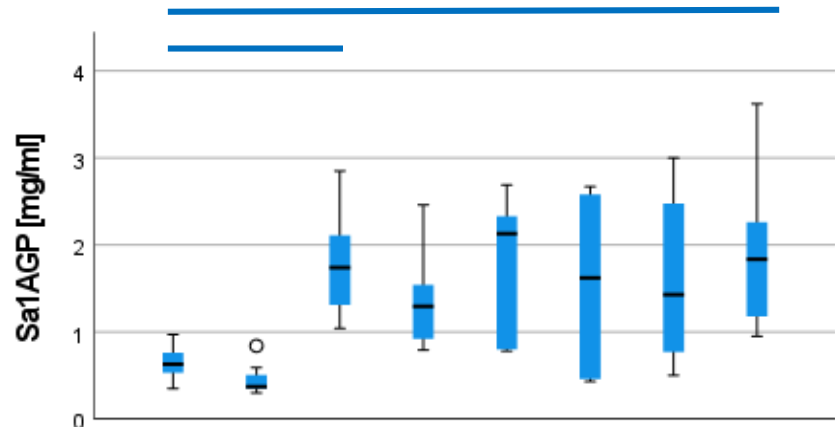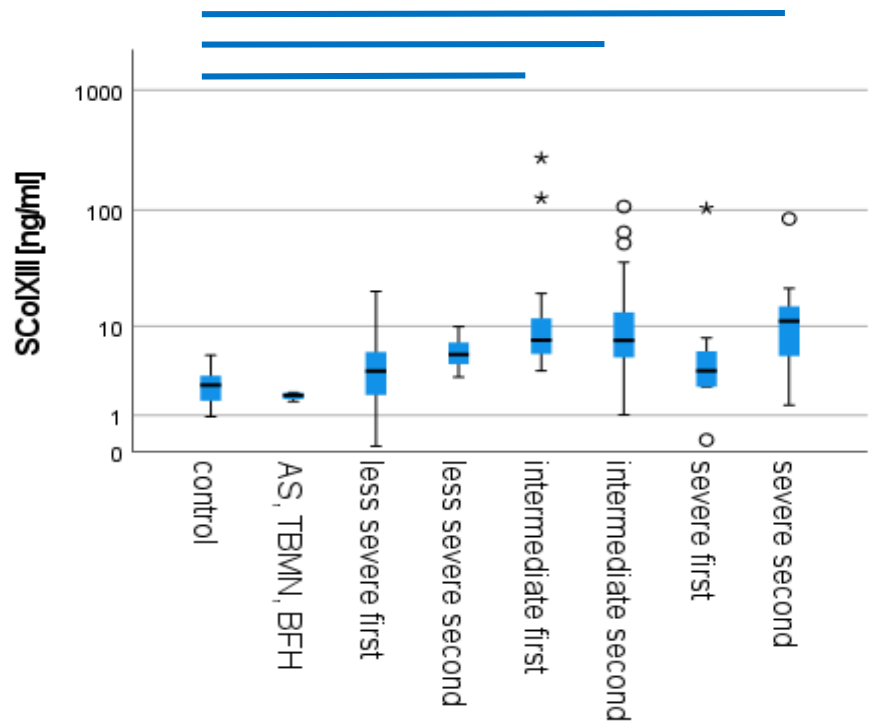

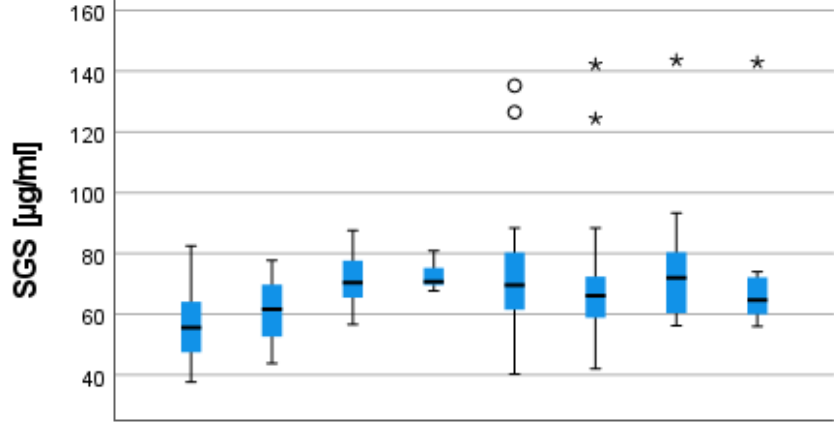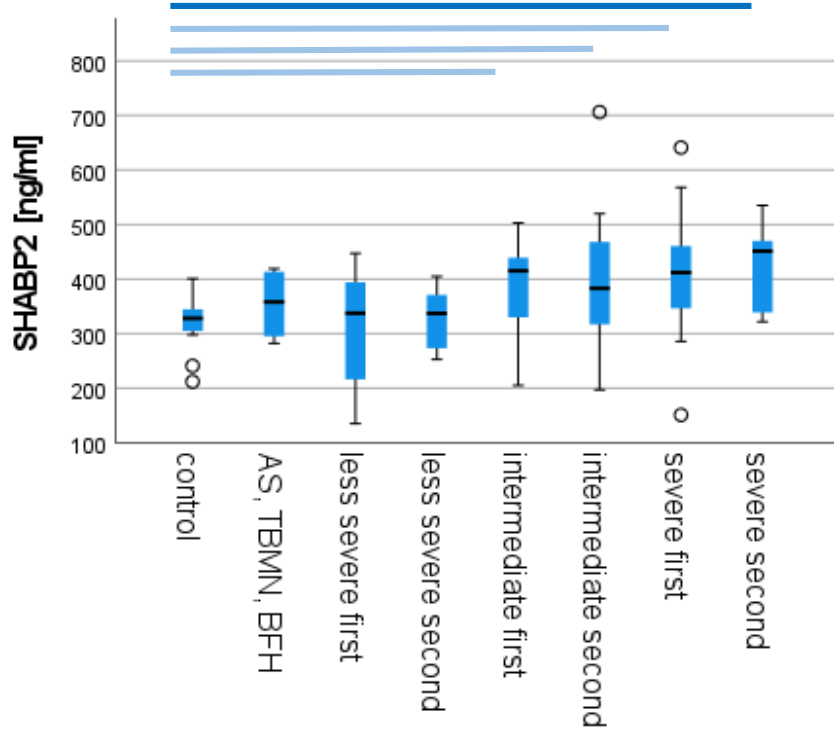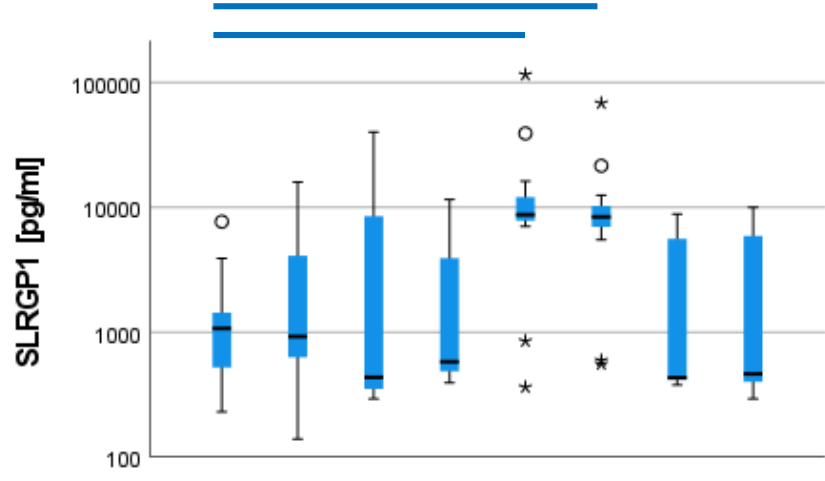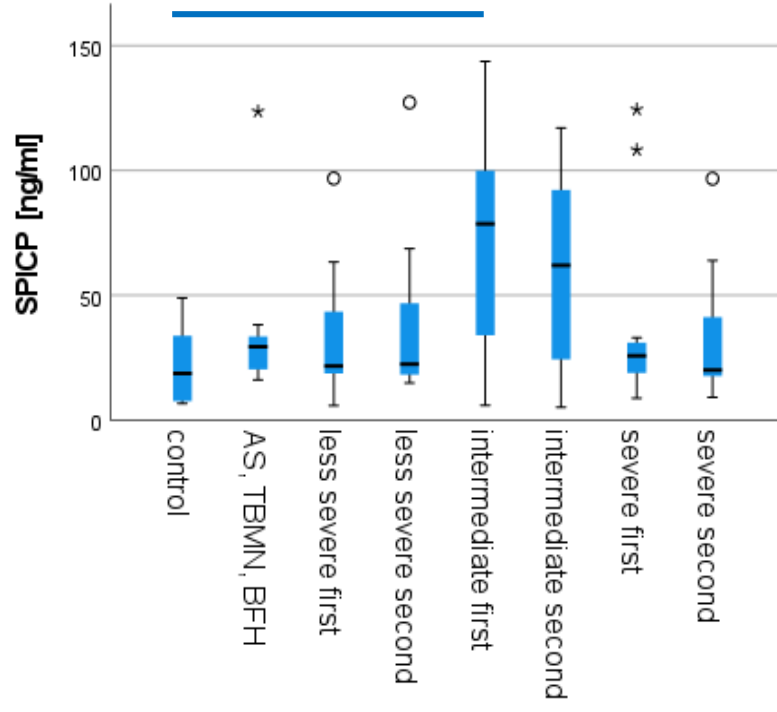

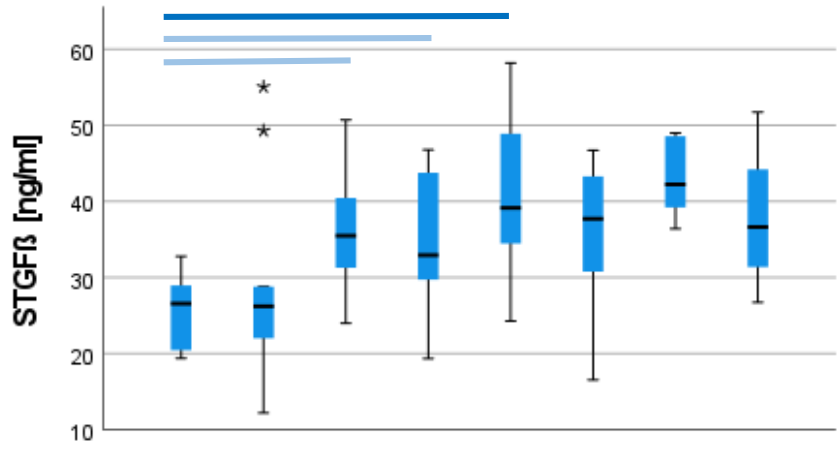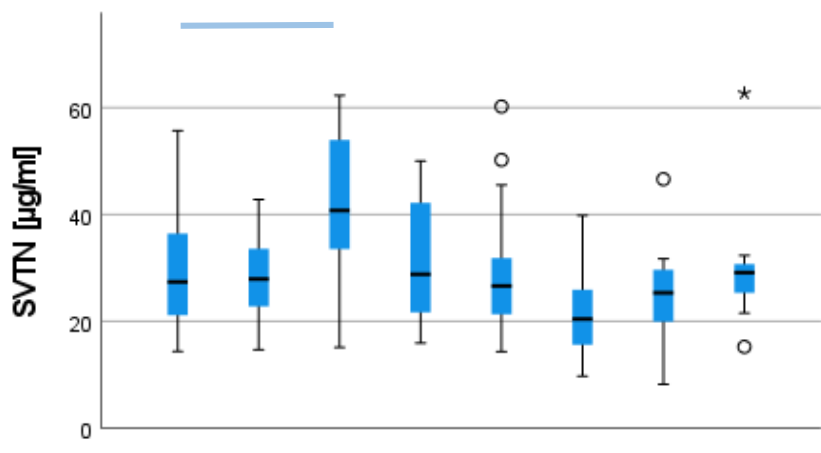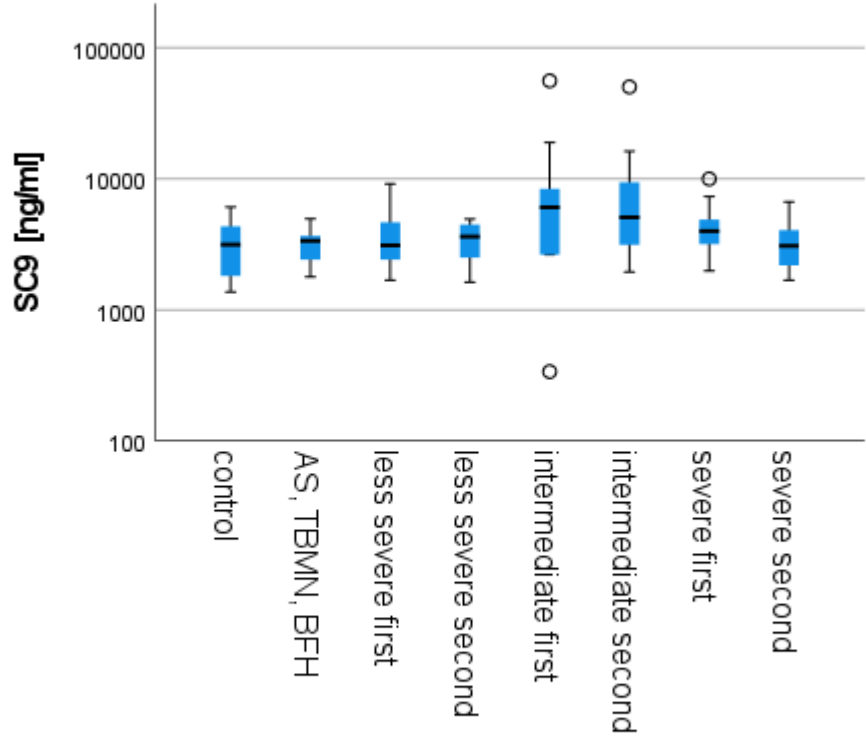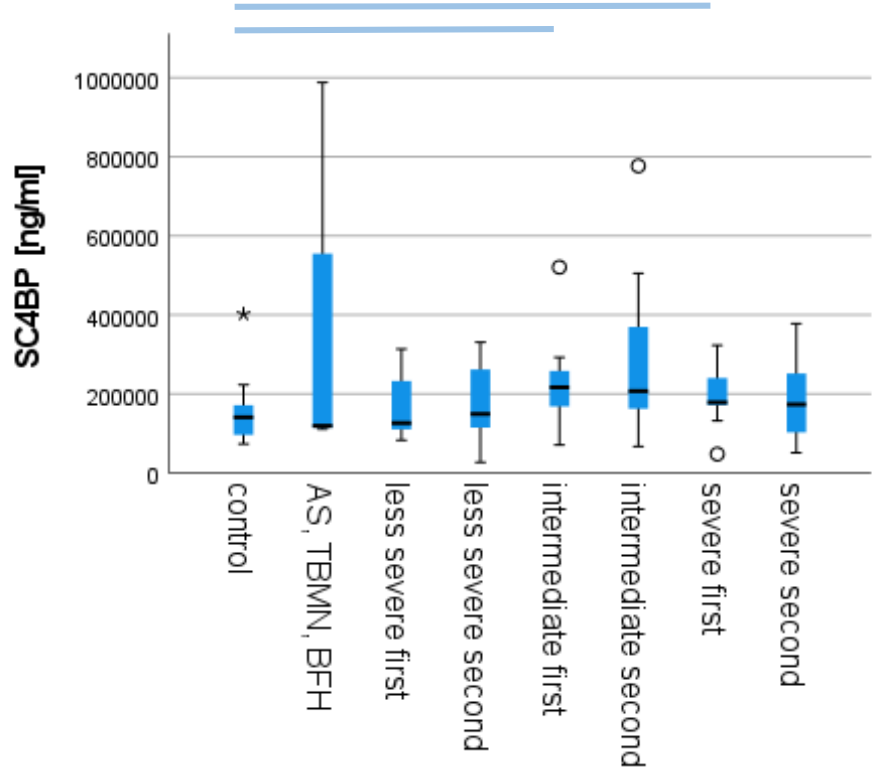

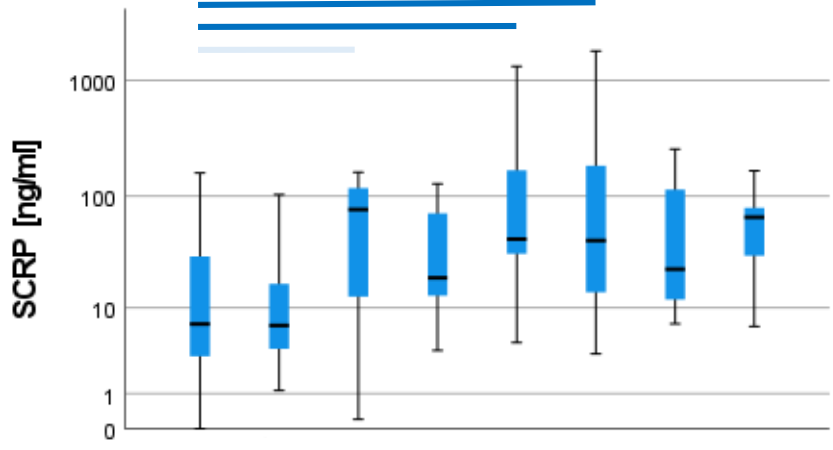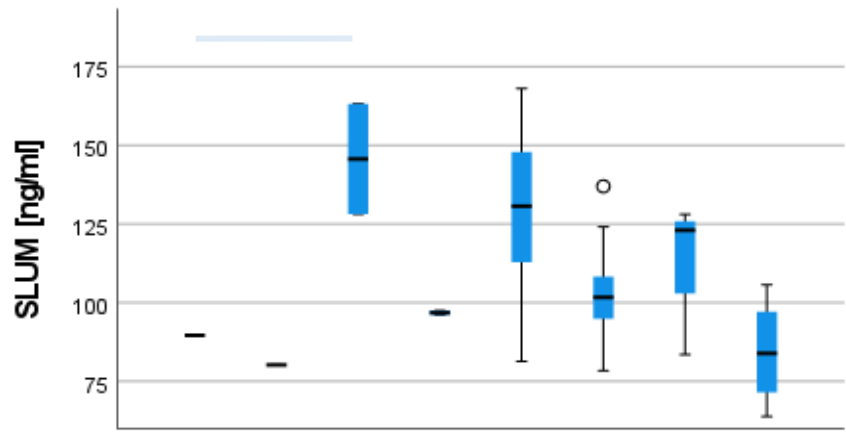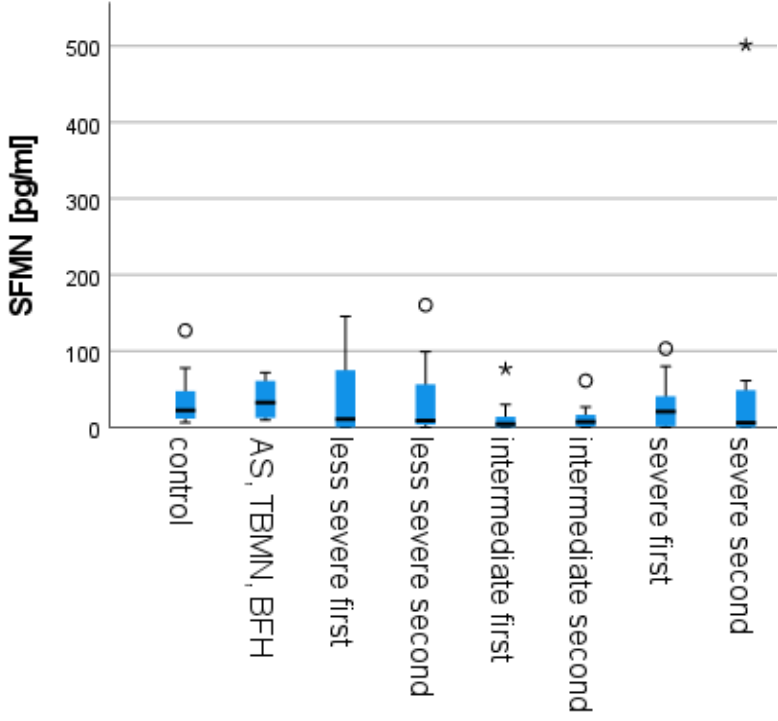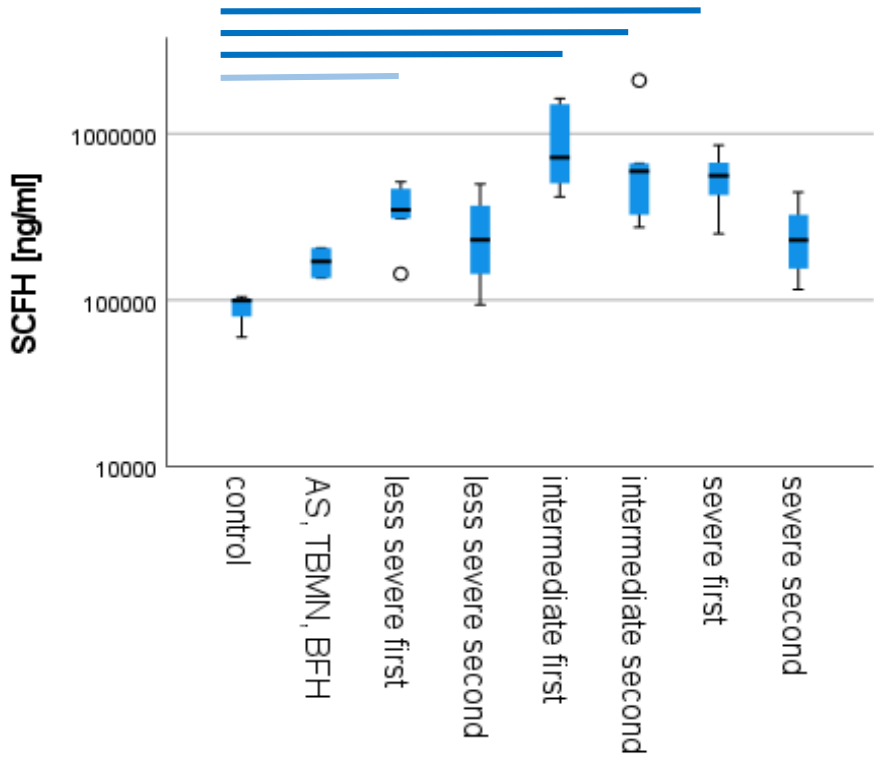

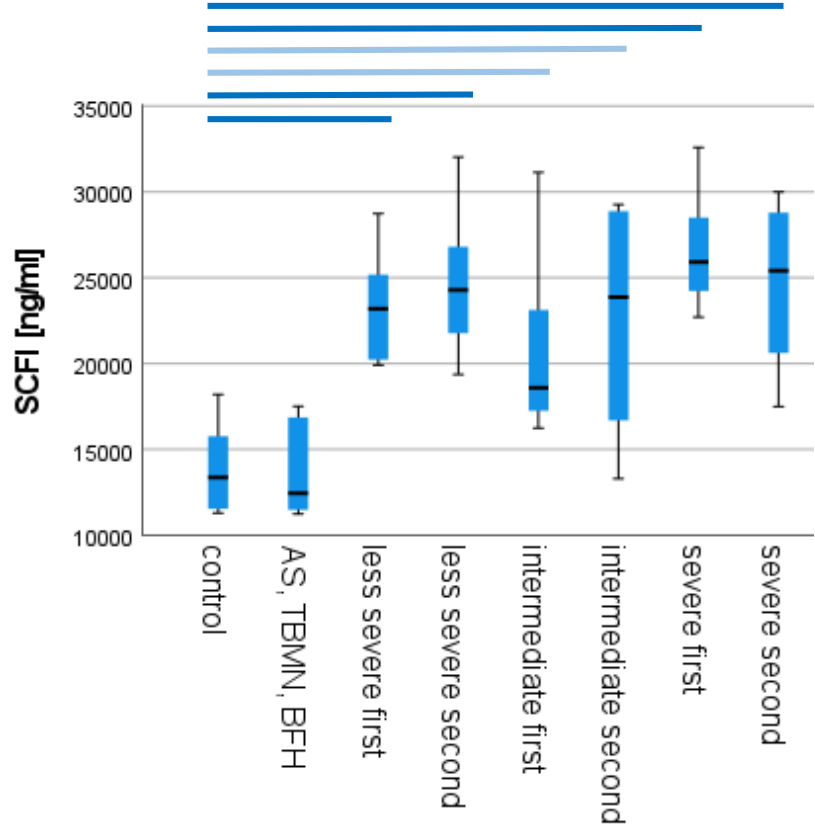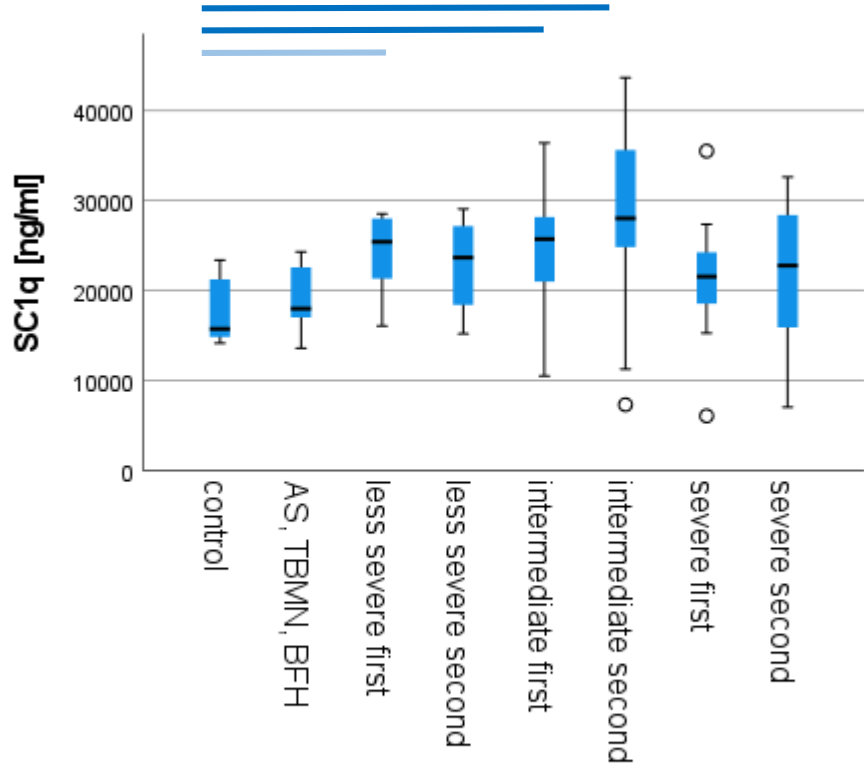

# Urine

UADP [ng/mg creatinine]

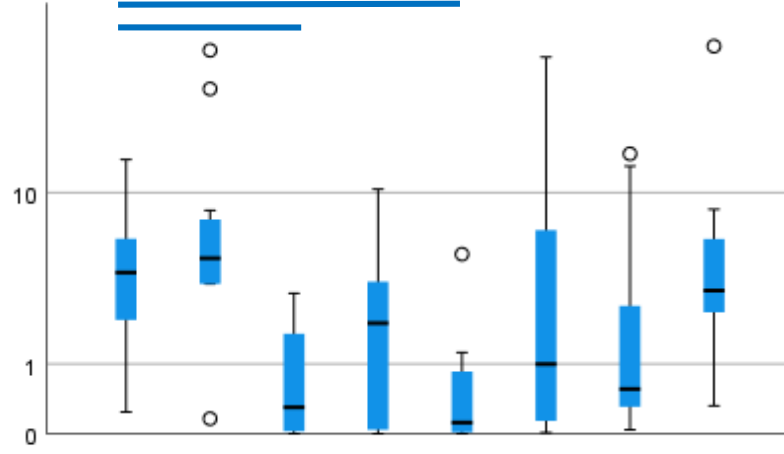

UAGT [ng/mg creatinine]

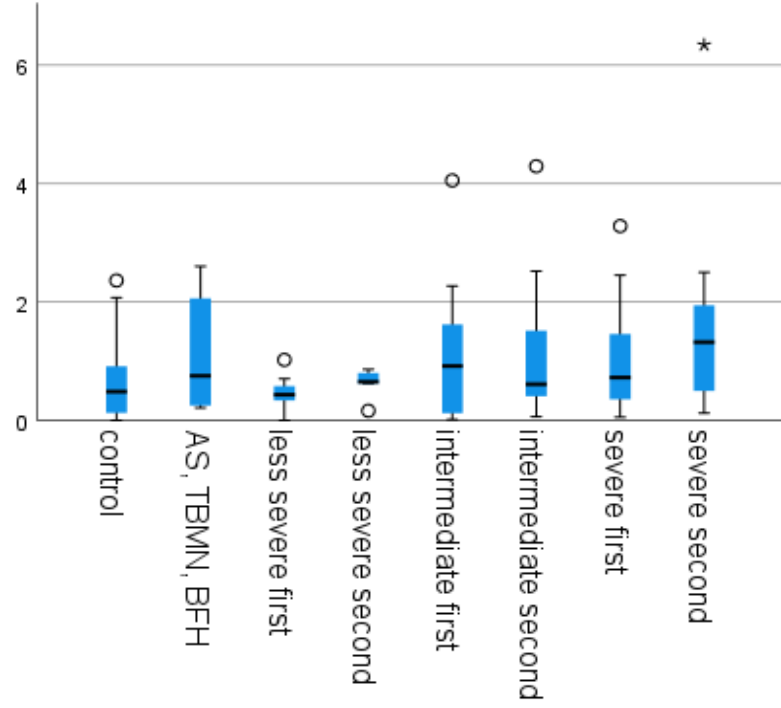

Ua1AGP [ng/mg creatinine]

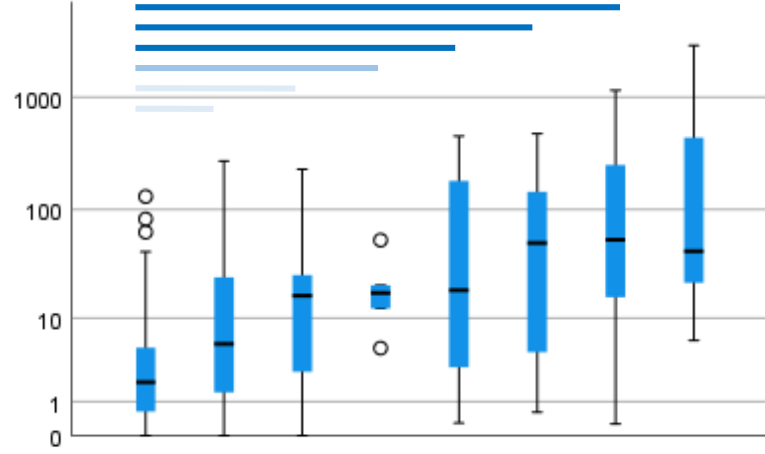

UCoIXIII [ng/mg creatinine]

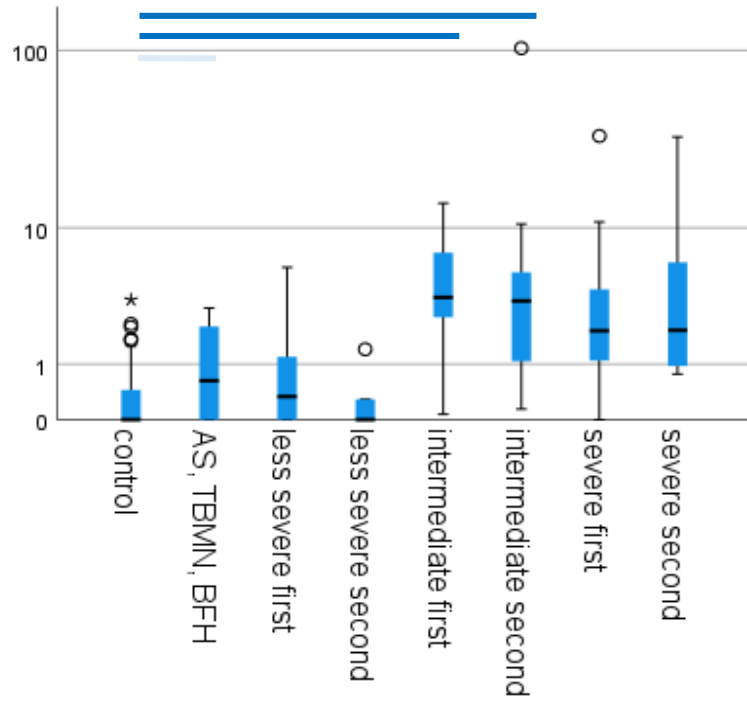

UHABP2 [ng/mg creatinine]

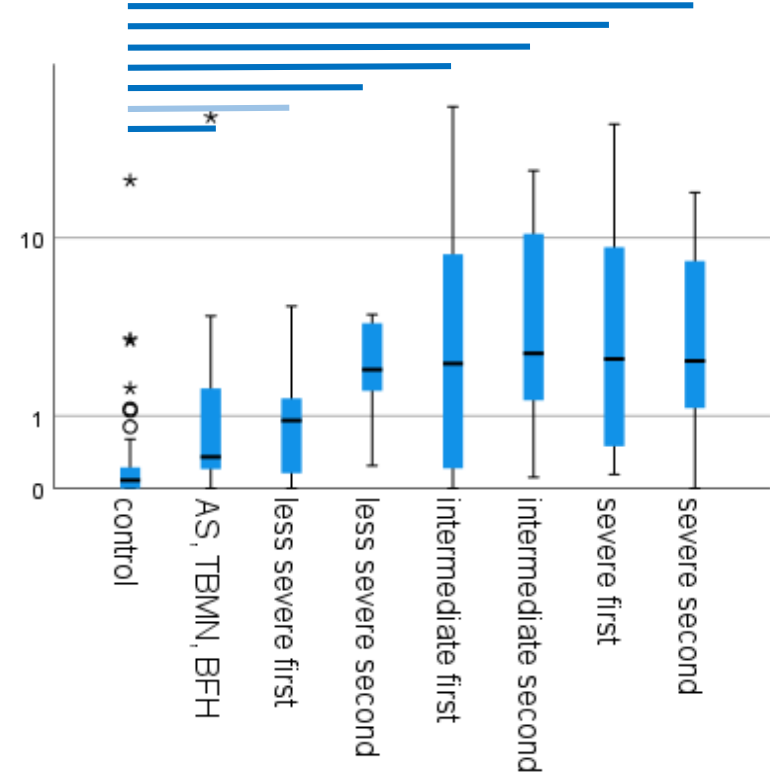

UGS [ng/mg creatinine]

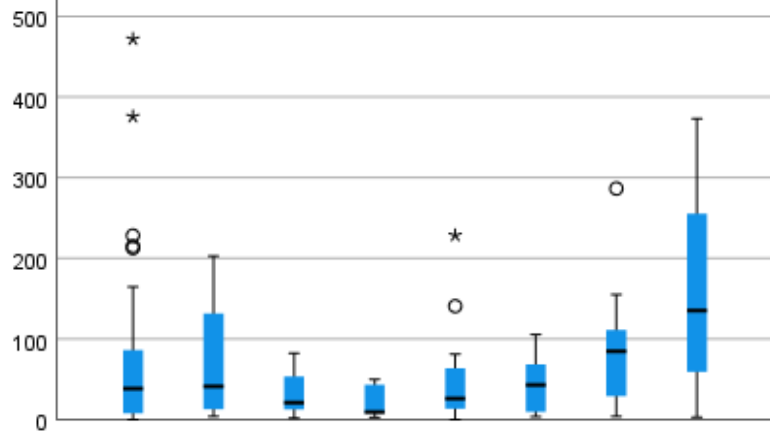

UPICP [pg/mg creatinine]

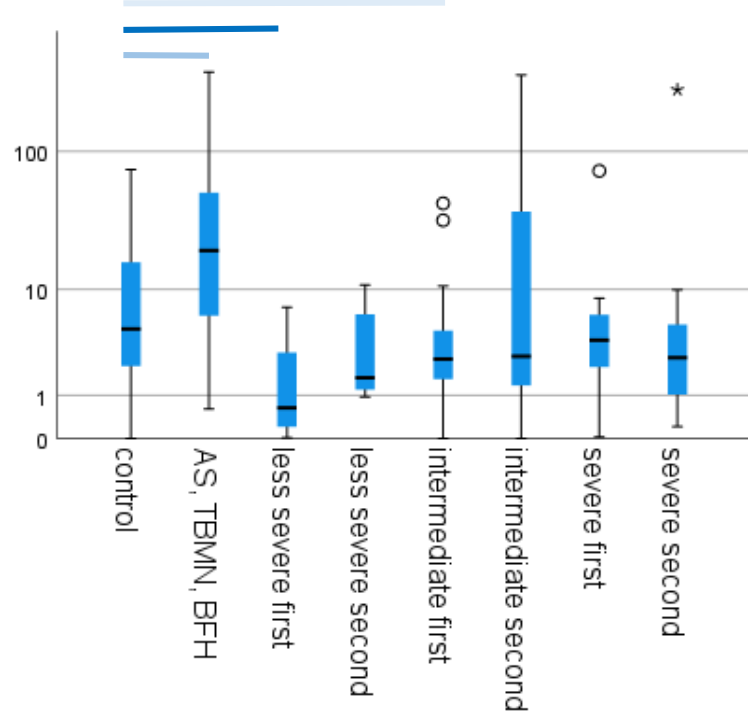

ULRGP1 [ng/mg creatinine]

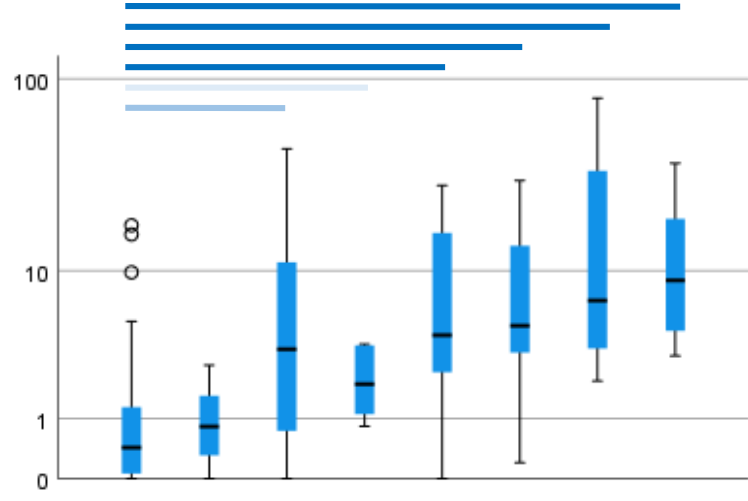

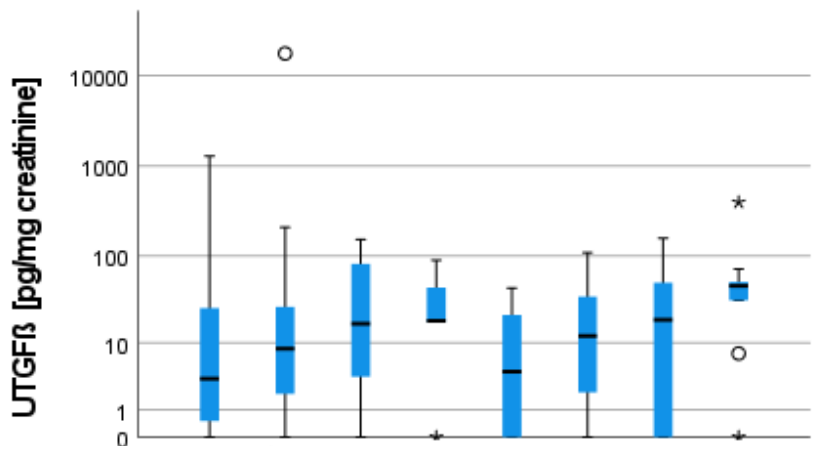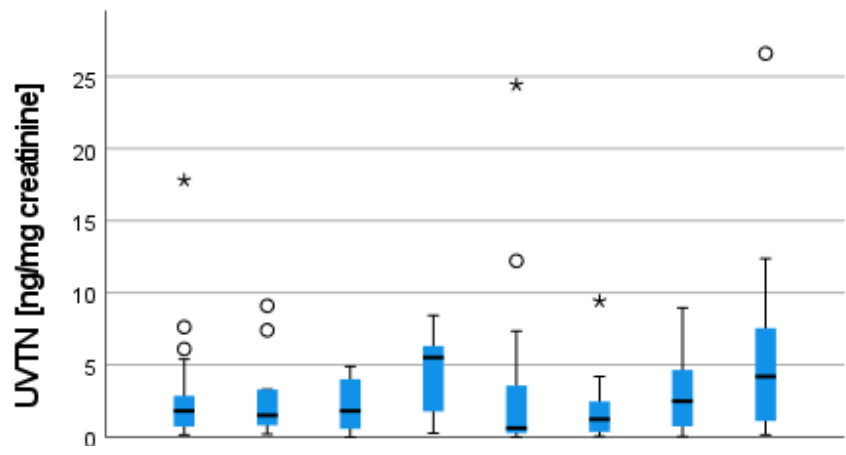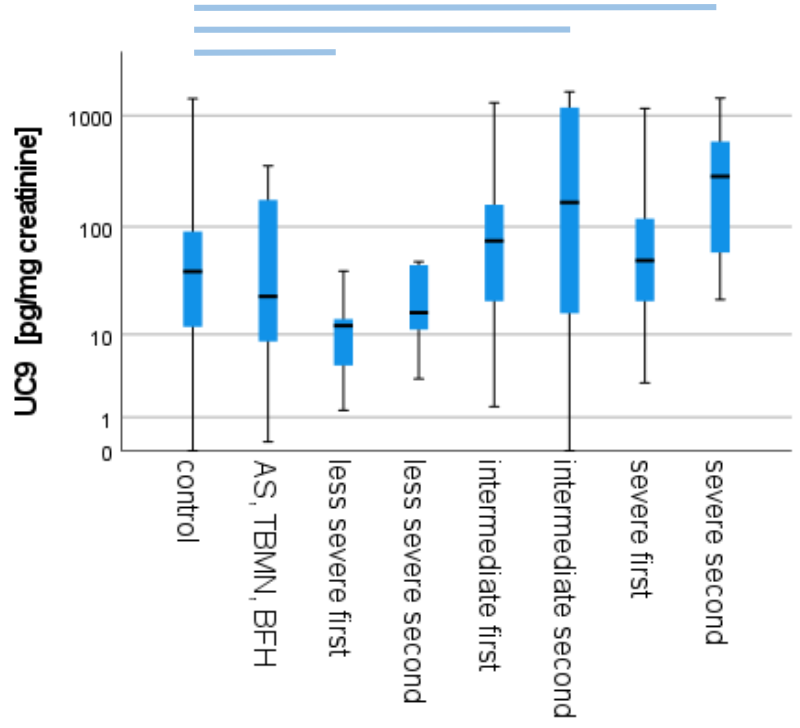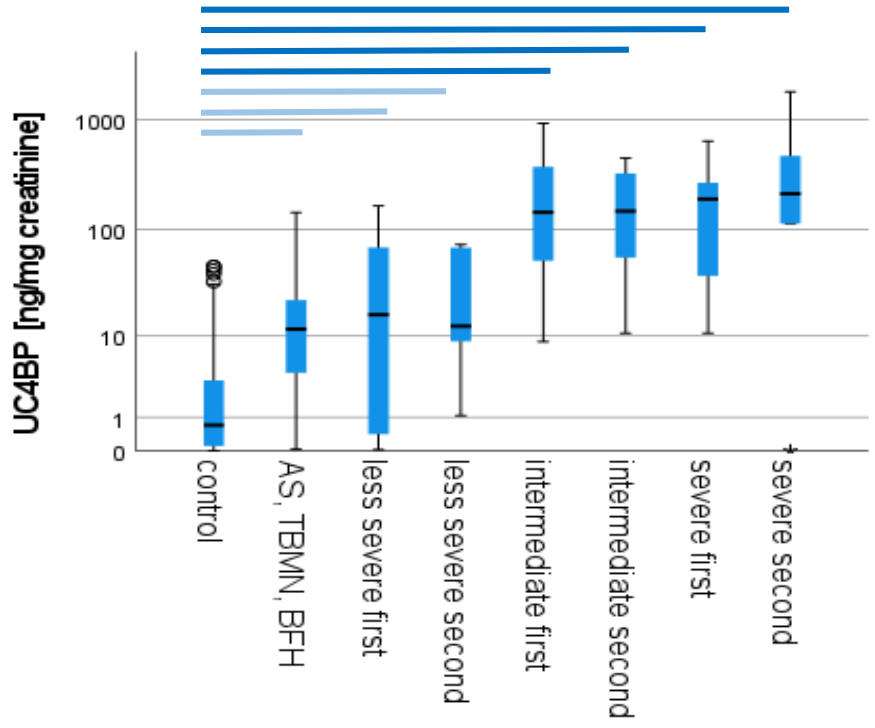



UCRP [pg/mg creatinine]

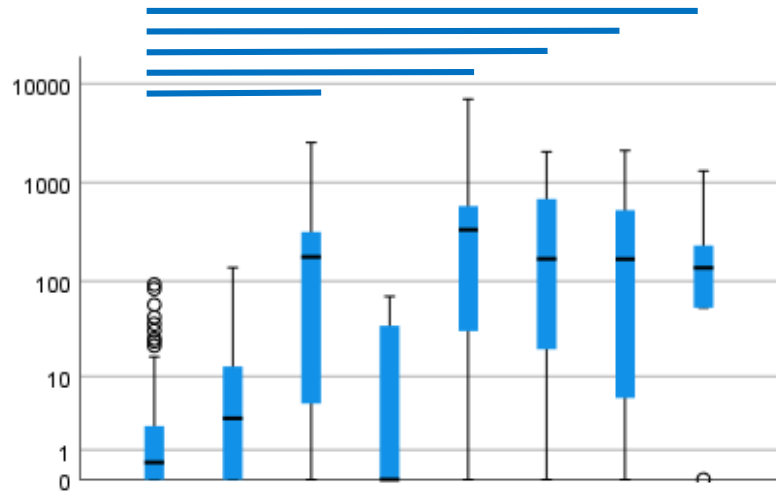

UCFH [ng/mg creatinine]

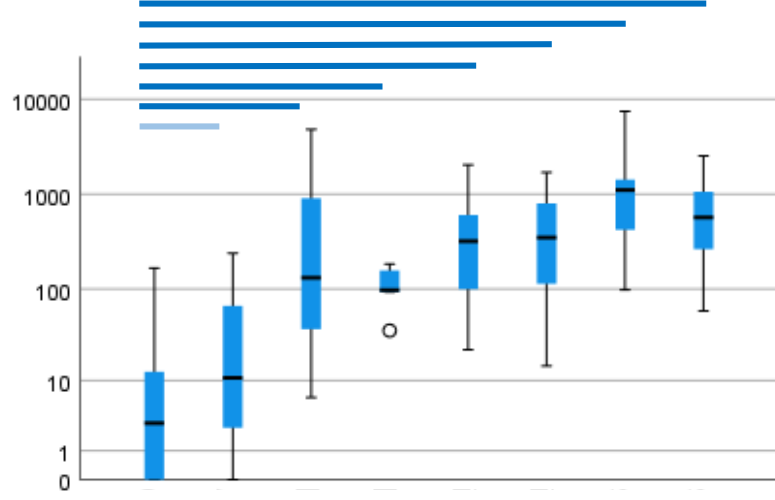

UCFI [ng/mg creatinine]

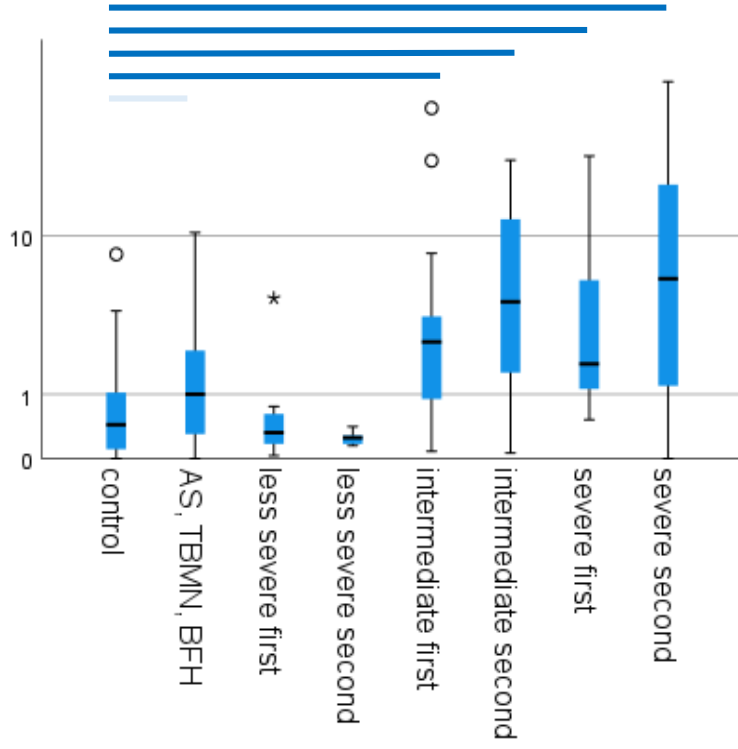

UFMN [pg/mg creatinine]

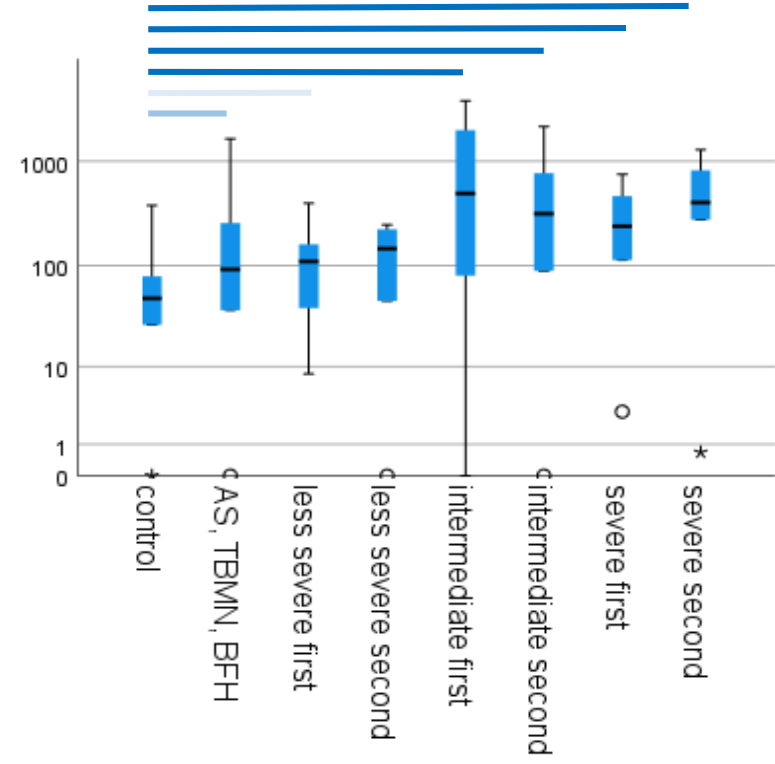

UC1q [ng/mg creatinine]

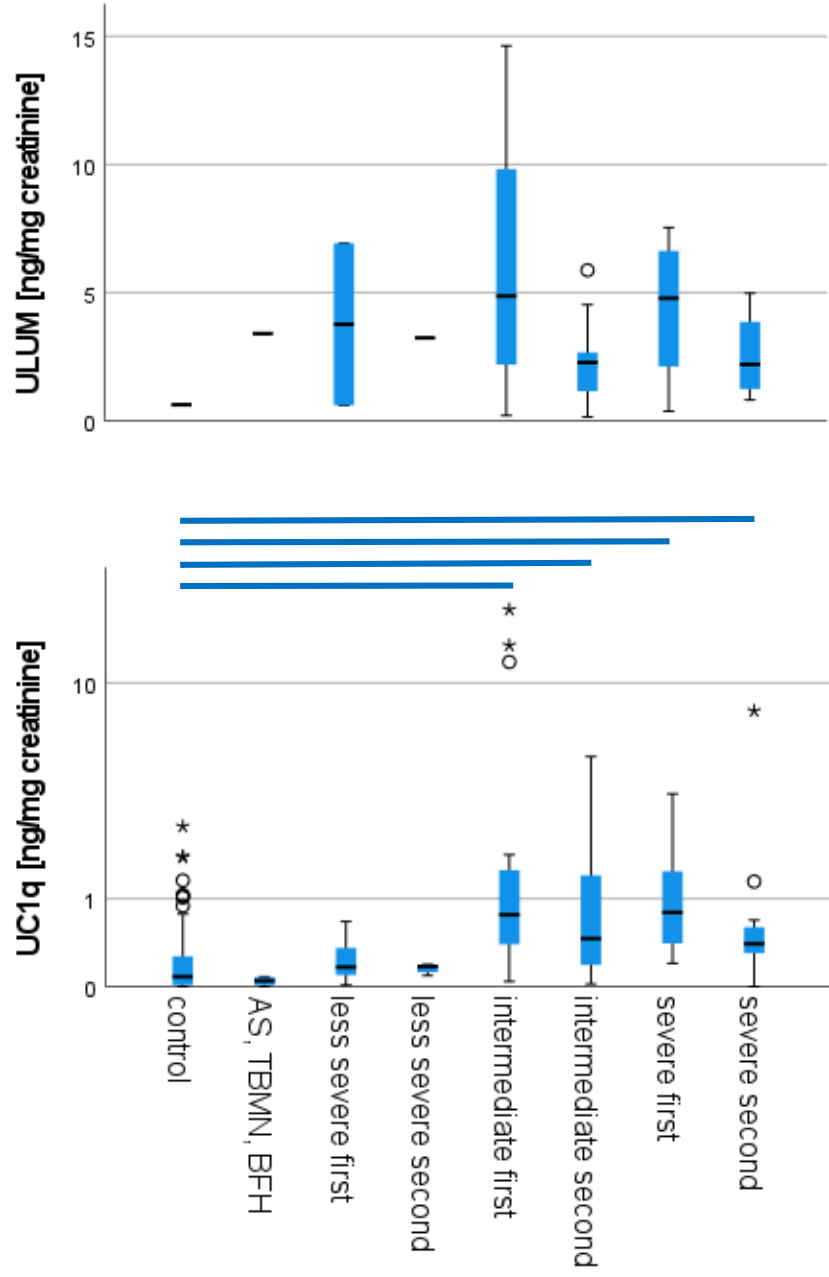

ULUM [ng/mg creatinine]

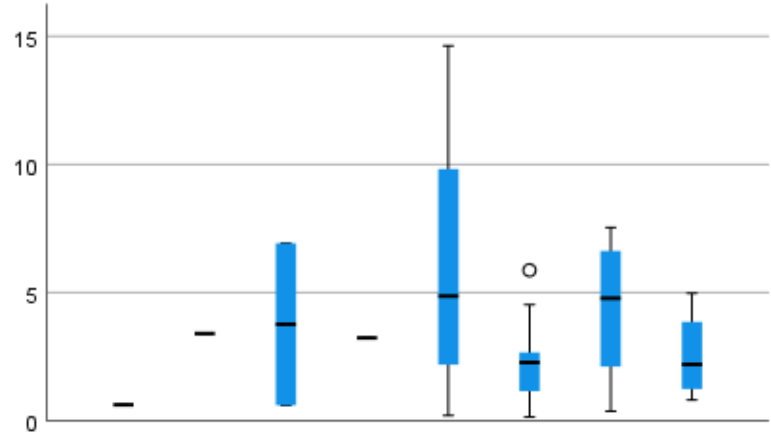

UFGG [ng/mg creatinine]

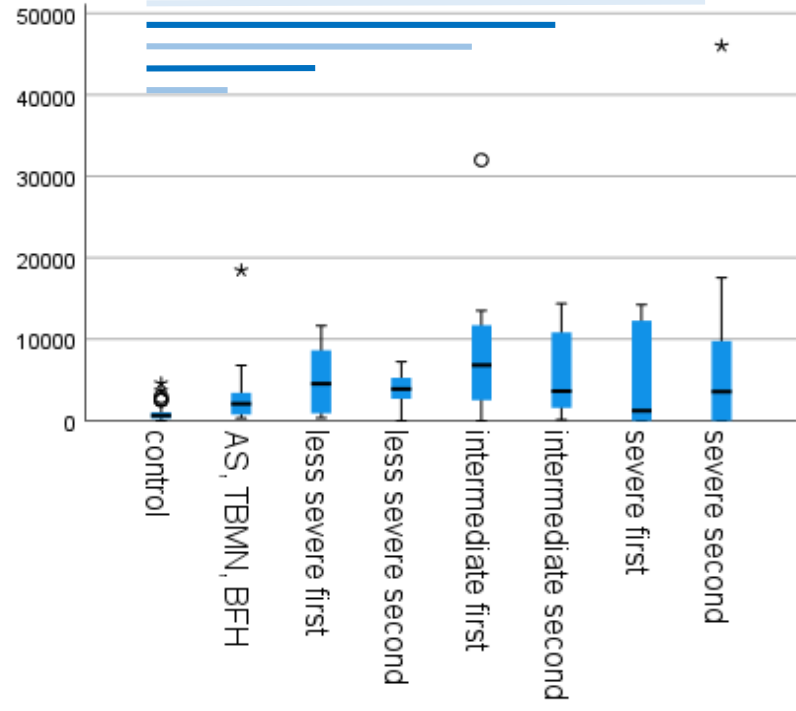

## Figure S10: Proteoforms and PTM of albumin

### A: Global distribution of plasma protein concentrations after 2D-AEC

Example: NM. Section of sub-fractions containing eight numbered chromatographic clusters of albumin (identified after mass spectrometry). Frames indicate sub-fractions, which form a cluster. Number and color code show the total fractional protein concentration. Black highlighting indicates the sub-fractions analyzed for PTM.

### B: Mass spectrometric quantifiers of albumin variants after analysis of sample from males (NM) by the Proteome discoverer<sup>®</sup>

Estimated percentage of albumin hits in each framed cluster compared to total hits of albumin in all sub-fractions. The analyzed fractions of the main clusters (2 to 6) contained ~48% of all albumin peptides of the sample.

**B-F:** Grey filling: albumin protein concentration is not altered in AM (ratios around 1.0,  $>0.5 \dots <2.0$ ); red filling: protein concentration is increased in AM in comparison to NM due to the ratios calculated by Sieve<sup>®</sup> (ratios  $>2$ , cf. Fig. C).

### C: Mass spectrometric comparison of the concentrations of albumin variants from AM and NM determined by Sieve<sup>®</sup>

The quantifier “ratio” indicates the quotient AM/NM of peptide signals and corresponds to the concentration quotient of albumin of homologous sub-fractions. The mean ratio was built from all sub-fractions of one cluster.

The main clusters of albumin (2 to 6) showed ratios of ~1.0. Thus, the protein concentrations of these proteoforms (clusters) are not altered under AS. Contrarily, the minor clusters 1 and 7 were found about six-fold and the cluster 8 even nearly 50-fold increased under AS.

### D-G: Deamidation and carbamoylation rates of albumin proteoforms

The search for PTM ran successively using Proteome Discoverer<sup>®</sup> 1.3 (Thermo) with no more than three dynamic modification types per run. We considered only highly confident database matches when the sequence coverage was  $>40\%$ . The following dynamic modifications of amino acids were analyzed: deamidation (N, Q, R) and carbamoylation (K, M, R). Multi reports of the related replicates were utilized.

Mean values of the modification rates, #PTM/PSM of albumin peptides were determined including the homologous sub-fractions from all NM, AM, NF, and CF.

In NM the minor clusters (1, 7, 8), which are elevated under AS, showed higher deamidation and lower carbamoylation rates than the main clusters. However, carbamoylation was significantly increased in minor clusters under AS (Fig. G).

| 2D-fraction | 0      | 1                   | 2     | 3     | 4     | 5      | 6     | 7                   | 8      | 9      | 10     | 11                  | 12     | 13     | 14     | 15                  | 16     | 17     | 18     | 19                   | 20    | 21    | 22    | 23                   | 24    | 25    | 26    |                      | 35    | 36    | 37     | 38                                  | 39     | 40     | 41     | 42     | Mr [kDa] |     |
|-------------|--------|---------------------|-------|-------|-------|--------|-------|---------------------|--------|--------|--------|---------------------|--------|--------|--------|---------------------|--------|--------|--------|----------------------|-------|-------|-------|----------------------|-------|-------|-------|----------------------|-------|-------|--------|-------------------------------------|--------|--------|--------|--------|----------|-----|
| 1D-fraction | sample | 25 mM NaCl (pH 7.4) |       |       |       |        |       | 40 mM NaCl (pH 7.4) |        |        |        | 50 mM NaCl (pH 7.4) |        |        |        | 75 mM NaCl (pH 7.4) |        |        |        | 100 mM NaCl (pH 7.4) |       |       |       | 125 mM NaCl (pH 7.4) |       |       |       | 225 mM NaCl (pH 7.2) |       |       |        | 500 mM NaCl (pH 7.2) + 20% Propanol |        |        |        |        |          |     |
| 25          | 0.001  | 0.26                | 0.690 | 0.546 | 0.018 | 0.000  | 0.001 | 0.003               | 0.005  | 0.006  | 0.006  | 0.005               | 0.006  | 0.005  | 0.004  | 0.004               | 0.007  | 0.004  | 0.005  | 0.004                | 0.017 | 0.016 | 0.014 | 0.013                | 0.049 | 0.050 | 0.043 | 0.166                | 0.216 | 0.035 | 0.020  | 0.044                               | 0.056  | -0.010 | -0.006 | 680    |          |     |
| 26          | -0.003 | 0.051               | 0.242 | 0.288 | 0.016 | 0.004  | 0.002 | 0.003               | 0.002  | 0.002  | 0.001  | 0.001               | 0.002  | 0.004  | 0.002  | 0.003               | 0.004  | 0.010  | 0.012  | 0.010                | 0.012 | 0.047 | 0.041 | 0.053                | 0.087 | 0.090 | 0.015 | 0.008                | 0.071 | 0.055 | -0.002 | -0.013                              | 645    |        |        |        |          |     |
| 27          | -0.003 | 0.000               | 0.112 | 0.357 | 0.020 | 0.001  | 0.003 | 0.001               | 0.000  | 0.000  | 0.000  | 0.002               | 0.002  | 0.002  | 0.001  | 0.001               | 0.001  | -0.001 | 0.000  | 0.001                | 0.007 | 0.006 | 0.005 | 0.004                | 0.021 | 0.020 | 0.014 | 0.066                | 0.166 | 0.014 | 0.004  | 0.023                               | 0.056  | 0.002  | 0.012  | 612    |          |     |
| 28          | -0.002 | 0.075               | 0.250 | 0.250 | 0.005 | 0.003  | 0.002 | 0.000               | -0.002 | -0.001 | -0.002 | -0.002              | -0.001 | -0.001 | -0.001 | -0.001              | -0.001 | -0.001 | -0.001 | 0.000                | 0.002 | 0.003 | 0.001 | 0.002                | 0.013 | 0.010 | 0.008 | 0.030                | 0.048 | 0.006 | 0.002  | 0.061                               | 0.035  | -0.015 | -0.018 | 581    |          |     |
| 29          | 0.002  | 0.003               | 0.312 | 0.312 | 0.023 | 0.005  | 0.006 | 0.001               | 0.001  | 0.001  | 0.001  | 0.001               | 0.001  | 0.001  | 0.001  | 0.001               | 0.001  | 0.001  | 0.002  | 0.004                | 0.007 | 0.004 | 0.003 | 0.011                | 0.010 | 0.007 | 0.031 | 0.062                | 0.007 | 0.004 | 0.023  | 0.022                               | 0.010  | -0.020 | 551    |        |          |     |
| 30          | -0.003 | 0.054               | 0.176 | 0.178 | 0.003 | -0.004 | 0.000 | -0.001              | -0.002 | -0.002 | -0.002 | -0.002              | -0.002 | -0.002 | -0.003 | -0.003              | -0.002 | -0.003 | -0.003 | 0.002                | 0.001 | 0.001 | 0.001 | 0.013                | 0.009 | 0.005 | 0.015 | 0.040                | 0.004 | 0.000 | 0.052  | 0.085                               | -0.032 | -0.031 | 523    |        |          |     |
| 31          | -0.003 | 0.035               | 0.152 | 0.174 | 0.007 | 0.001  | 0.002 | 0.000               | 0.002  | 0.000  | 0.000  | 0.001               | 0.001  | 0.000  | -0.001 | 0.000               | -0.001 | 0.000  | -0.001 | 0.001                | 0.001 | 0.004 | 0.003 | 0.014                | 0.011 | 0.011 | 0.023 | 0.058                | 0.018 | 0.003 | 0.031  | 0.075                               | 0.006  | 0.009  | 496    |        |          |     |
| 32          | -0.001 | 0.033               | 0.167 | 0.168 | 0.007 | 0.001  | 0.002 | 0.002               | 0.001  | 0.000  | -0.001 | 0.000               | 0.001  | 0.002  | 0.003  | 0.002               | 0.001  | 0.002  | 0.004  | 0.002                | 0.003 | 0.008 | 0.009 | 0.008                | 0.007 | 0.018 | 0.018 | 0.013                | 0.019 | 0.063 | 0.011  | 0.004                               | 0.003  | 0.036  | -0.023 | -0.027 | 471      |     |
| 33          | 0.004  | 0.088               | 0.318 | 0.312 | 0.027 | 0.002  | 0.002 | 0.003               | 0.002  | 0.003  | 0.002  | 0.001               | 0.001  | 0.001  | 0.001  | 0.001               | 0.001  | 0.001  | 0.002  | 0.002                | 0.002 | 0.003 | 0.012 | 0.012                | 0.008 | 0.007 | 0.021 | 0.017                | 0.010 | 0.019 | 0.060  | 0.013                               | 0.003  | 0.038  | 0.076  | 0.003  | -0.035   | 447 |
| 34          | -0.001 | 0.051               | 0.214 | 0.227 | 0.021 | 0.002  | 0.002 | 0.002               | 0.004  | 0.000  | -0.001 | -0.001              | 0.002  | 0.000  | 0.000  | -0.001              | 0.000  | -0.001 | 0.000  | 0.002                | 0.008 | 0.011 | 0.007 | 0.006                | 0.023 | 0.019 | 0.011 | 0.020                | 0.093 | 0.011 | 0.002  | 0.008                               | 0.038  | 0.003  | 0.001  | 0.001  | 424      |     |
| 35          | 0.002  | 0.139               | 0.300 | 0.250 | 0.002 | -0.002 | 0.004 | 0.003               | 0.002  | 0.001  | -0.001 | -0.002              | -0.002 | -0.002 | -0.003 | -0.003              | -0.002 | -0.002 | -0.002 | 0.010                | 0.009 | 0.007 | 0.004 | 0.022                | 0.013 | 0.007 | 0.014 | 0.062                | 0.006 | 0.000 | 0.060  | 0.080                               | -0.041 | -0.036 | 402    |        |          |     |
| 36          | 0.001  | 0.135               | 0.329 | 0.285 | 0.018 | 0.005  | 0.005 | 0.005               | 0.002  | 0.001  | 0.001  | 0.000               | 0.001  | 0.001  | 0.001  | 0.001               | 0.001  | 0.001  | 0.002  | 0.010                | 0.012 | 0.010 | 0.008 | 0.026                | 0.017 | 0.009 | 0.019 | 0.069                | 0.008 | 0.002 | 0.010  | 0.007                               | -0.018 | -0.021 | 382    |        |          |     |
| 37          | -0.002 | 0.116               | 0.317 | 0.278 | 0.019 | 0.003  | 0.003 | 0.002               | 0.001  | 0.000  | -0.001 | 0.000               | 0.001  | 0.001  | -0.001 | -0.002              | -0.001 | 0.000  | -0.001 | 0.001                | 0.008 | 0.009 | 0.008 | 0.007                | 0.018 | 0.018 | 0.013 | 0.017                | 0.046 | 0.010 | 0.004  | 0.003                               | 0.036  | -0.032 | -0.034 | 362    |          |     |
| 38          | -0.002 | 0.121               | 0.336 | 0.312 | 0.027 | 0.002  | 0.002 | 0.006               | 0.004  | 0.001  | 0.000  | 0.001               | 0.001  | -0.001 | -0.001 | -0.001              | -0.001 | -0.001 | 0.001  | 0.008                | 0.008 | 0.008 | 0.008 | 0.031                | 0.023 | 0.016 | 0.017 | 0.046                | 0.013 | 0.003 | 0.020  | 0.048                               | 0.003  | 0.015  | 344    |        |          |     |
| 39          | 0.002  | 0.112               | 0.283 | 0.272 | 0.028 | 0.014  | 0.005 | 0.003               | 0.004  | 0.003  | 0.003  | 0.004               | 0.003  | 0.002  | 0.001  | 0.001               | 0.003  | 0.004  | 0.002  | 0.004                | 0.015 | 0.015 | 0.013 | 0.013                | 0.043 | 0.033 | 0.021 | 0.017                | 0.057 | 0.013 | 0.006  | 0.022                               | 0.036  | -0.001 | -0.008 | 326    |          |     |
| 40          | 0.004  | 0.162               | 0.367 | 0.336 | 0.020 | -0.001 | 0.000 | 0.000               | 0.003  | 0.009  | 0.004  | 0.005               | 0.005  | 0.004  | 0.006  | 0.002               | 0.006  | 0.004  | 0.002  | 0.005                | 0.018 | 0.016 | 0.013 | 0.013                | 0.041 | 0.029 | 0.021 | 0.018                | 0.071 | 0.016 | 0.008  | 0.150                               | 0.091  | 0.013  | 0.008  | 309    |          |     |
| 41          | 0.005  | 0.152               | 0.361 | 0.379 | 0.020 | 0.000  | 0.000 | 0.001               | 0.006  | 0.007  | 0.004  | 0.003               | 0.004  | 0.004  | 0.003  | 0.003               | 0.003  | 0.006  | 0.006  | 0.004                | 0.007 | 0.028 | 0.027 | 0.024                | 0.020 | 0.061 | 0.044 | 0.030                | 0.017 | 0.065 | 0.015  | 0.010                               | 0.032  | 0.044  | -0.012 | -0.004 | 293      |     |
| 42          | 0.004  | 0.366               | 0.602 | 0.548 | 0.039 | 0.007  | 0.001 | 0.001               | 0.006  | 0.005  | 0.003  | 0.003               | 0.004  | 0.001  | 0.001  | 0.002               | 0.006  | 0.004  | 0.005  | 0.024                | 0.028 | 0.023 | 0.018 | 0.054                | 0.039 | 0.028 | 0.013 | 0.050                | 0.011 | 0.005 | 0.007  | 0.006                               | 0.028  | -0.022 | -0.022 | 278    |          |     |
| 43          | -0.003 | 0.106               | 0.254 | 0.257 | 0.021 | 0.002  | 0.002 | 0.006               | 0.014  | 0.011  | 0.006  | 0.003               | 0.007  | 0.006  | 0.004  | 0.004               | 0.004  | 0.002  | 0.021  | 0.021                | 0.021 | 0.021 | 0.446 | 0.211                | 0.236 | 0.244 | 0.428 | 0.155                | 0.064 | 0.106 | 0.013  | 0.004                               | 0.050  | 0.050  | 0.012  | 0.013  | 264      |     |
| 44          | -0.007 | 0.062               | 0.207 | 0.220 | 0.035 | 0.014  | 0.018 | 0.016               | 0.076  | 0.036  | 0.017  | 0.013               | 0.036  | 0.028  | 0.020  | 0.023               | 0.033  | 0.032  | 0.022  | 0.021                | 0.164 | 0.300 | 0.282 | 0.278                | 0.506 | 0.146 | 0.064 | 0.015                | 0.062 | 0.011 | 0.005  | 0.085                               | 0.064  | -0.015 | -0.021 | 251    |          |     |
| 45          | -0.004 | 0.120               | 0.327 | 0.343 | 0.084 | 0.041  | 0.037 | 0.041               | 0.133  | 0.065  | 0.038  | 0.022               | 0.068  | 0.055  | 0.039  | 0.037               | 0.168  | 0.070  | 0.055  | 0.065                | 0.682 | 0.276 | 0.404 | 0.411                | 0.842 | 0.166 | 0.075 | 0.022                | 0.080 | 0.017 | 0.008  | 0.047                               | 0.084  | -0.032 | -0.025 | 238    |          |     |
| 46          | -0.007 | 0.075               | 0.305 | 0.343 | 0.127 | 0.064  | 0.049 | 0.050               | 0.167  | 0.070  | 0.035  | 0.024               | 0.060  | 0.051  | 0.037  | 0.050               | 0.180  | 0.071  | 0.050  | 0.117                | 0.694 | 0.420 | 0.538 | 0.918                | 0.457 | 0.164 | 0.065 | 0.014                | 0.065 | 0.015 | 0.004  | 0.018                               | 0.033  | -0.033 | -0.031 | 228    |          |     |
| 47          | -0.004 | 0.085               | 0.388 | 0.436 | 0.137 | 0.072  | 0.059 | 0.060               | 0.191  | 0.092  | 0.047  | 0.032               | 0.073  | 0.060  | 0.048  | 0.055               | 0.253  | 0.124  | 0.122  | 0.227                | 0.883 | 0.426 | 0.537 | 0.918                | 0.534 | 0.162 | 0.069 | 0.016                | 0.063 | 0.018 | 0.005  | 0.046                               | 0.074  | -0.022 | -0.002 | 214    |          |     |
| 48          | -0.005 | 0.156               | 0.413 | 0.414 | 0.096 | 0.046  | 0.036 | 0.044               | 0.168  | 0.076  | 0.043  | 0.031               | 0.070  | 0.050  | 0.044  | 0.056               | 0.174  | 0.173  | 0.203  | 0.336                | 1.046 | 0.624 | 0.758 | 1.244                | 0.447 | 0.140 | 0.059 | 0.018                | 0.050 | 0.015 | 0.006  | 0.016                               | 0.030  | -0.029 | -0.029 | 203    |          |     |
| 49          | -0.005 | 0.145               | 0.379 | 0.365 | 0.088 | 0.037  | 0.029 | 0.036               | 0.132  | 0.061  | 0.038  | 0.027               | 0.060  | 0.052  | 0.040  | 0.051               | 0.346  | 0.268  | 0.311  | 0.371                | 0.904 | 0.568 | 0.273 | 0.246                | 0.300 | 0.101 | 0.043 | 0.015                | 0.050 | 0.014 | 0.007  | 0.033                               | 0.047  | -0.002 | -0.018 | 193    |          |     |
| 50          | -0.003 | 0.216               | 0.430 | 0.434 | 0.049 | 0.015  | 0.013 | 0.018               | 0.075  | 0.048  | 0.030  | 0.016               | 0.039  | 0.036  | 0.027  | 0.033               | 0.283  | 0.266  | 0.288  | 0.372                | 1.056 | 0.174 | 0.286 | 0.293                | 0.293 | 0.089 | 0.036 | 0.010                | 0.056 | 0.013 | 0.003  | 0.019                               | 0.041  | -0.007 | -0.007 | 183    |          |     |
| 51          | -0.003 | 0.400               | 0.694 | 0.847 | 0.040 | 0.006  | 0.002 | 0.005               | 0.025  | 0.019  | 0.010  | 0.005               | 0.015  | 0.012  | 0.012  | 0.010               | 0.019  | 0.010  | 0.099  | 0.129                | 0.537 | 0.342 | 0.165 | 0.157                | 0.049 | 0.021 | 0.011 | 0.044                | 0.009 | 0.003 | 0.055  | 0.041                               | -0.016 | -0.022 | 174    |        |          |     |
| 52          | -0.006 | 0.555               | 0.752 | 0.836 | 0.048 | 0.004  | 0.004 | 0.005               | 0.011  | 0.008  | 0.004  | 0.005               | 0.005  | 0.005  | 0.002  | 0.003               | 0.016  | 0.010  | 0.008  | 0.010                | 0.884 | 0.658 | 0.242 | 0.308                | 0.030 | 0.013 | 0.005 | 0.009                | 0.047 | 0.007 | 0.003  | 0.038                               | 0.044  | -0.007 | -0.015 | 165    |          |     |
| 53          | -0.001 | 0.068               | 0.265 | 0.347 | 0.024 | 0.004  | 0.005 | 0.005               | 0.007  | 0.006  | 0.001  | 0.002               | 0.004  | 0.005  | 0.002  | 0.002               | 0.021  | 0.013  | 0.010  | 0.010                | 0.177 | 0.180 | 0.127 | 0.168                | 0.180 | 0.018 | 0.018 | 0.005                | 0.032 | 0.002 | -0.001 | -0.001                              | 0.003  | 0.024  | 0.021  | 156    |          |     |
| 54          | 0.001  | 0.157               | 0.442 | 0.477 | 0.050 | 0.006  | 0.004 | 0.004               | 0.007  | 0.005  | 0.002  | 0.003               | 0.004  | 0.003  | 0.001  | 0.001               | 0.012  | 0.006  | 0.005  | 0.009                | 0.058 | 0.058 | 0.054 | 0.053                | 0.107 | 0.042 | 0.013 | 0.012                | 0.053 | 0.005 | 0.001  | 0.031                               | 0.025  | 0.011  | 0.012  | 148    |          |     |
| 55          | -0.002 | 0.125               | 0.289 | 0.277 | 0.017 | 0.002  | 0.003 | 0.004               | 0.014  | 0.008  | 0.006  | 0.011               | 0.009  | 0.007  | 0.007  | 0.023               | 0.015  | 0.012  | 0.015  | 0.117                | 0.130 | 0.111 | 0.107 | 0.266                | 0.110 | 0.043 | 0.009 | 0.063                | 0.008 | 0.004 | -0.004 | 0.000                               | -0.033 | -0.031 | 141    |        |          |     |
| 56          | -0.001 | 0.076               | 0.198 | 0.201 | 0.019 | 0.001  | 0.003 | 0.004               | 0.017  | 0.018  | 0.012  | 0.009               | 0.017  | 0.014  | 0.011  | 0.010               | 0.027  | 0.019  | 0.014  | 0.015                | 0.104 | 0.129 | 0.095 | 0.074                | 0.193 | 0.097 | 0.040 | 0.012                | 0.054 | 0.009 | 0.005  | 0.025                               | 0.027  | 0.003  | -0.003 | 134    |          |     |
| 57          | -0.006 | 0.008               | 0.106 | 0.138 | 0.059 | 0.022  | 0.019 | 0                   |        |        |        |                     |        |        |        |                     |        |        |        |                      |       |       |       |                      |       |       |       |                      |       |       |        |                                     |        |        |        |        |          |     |

## Figure S11: Proteoforms and PTM of transferrin

### A: Global distribution of plasma protein concentrations after 2D-AEC (NM)

Section of sub-fraction containing seven numbered chromatographic clusters of transferrin. Frames indicate sub-fractions, which form a cluster and analyzed by mass spectrometry. Number and color code show the total fractional protein concentration. Black highlighting indicates the sub-fractions analyzed for PTM (see legend to Fig. S7).

### B: Mass spectrometric quantifiers of transferrin variants after analysis of sample from NM by the Proteome discoverer<sup>®</sup>

Grey: mass spectrometric analyzed sub-fractions. Figures indicate the presence of transferrin peptides. Quantifiers (second line): A: area (red color code); P: number of peptides (green color code); C: sequence coverage. Frames indicate sub-fractions, which form a cluster and analyzed by mass spectrometry.

### C: Mass spectrometric comparison of the concentrations of transferrin variants from AM and NM determined by Sieve<sup>®</sup>

Grey: mass spectrometric analyzed sub-fractions. Figures indicate the presence of transferrin peptides. The quantifier "ratio" (from  $\gg 1.0$  to  $\ll 1.0$ , color code from red to green) indicate the quotients AM/NM of peptide signals and corresponds to the concentration quotient of transferrin of homologous sub-fractions. P: number of peptides; H: hits. Frames indicate sub-fractions, which form a cluster.

### D: Mass spectrometric comparison of the concentrations of transferrin variants from AM and NM determined by the Proteome discoverer<sup>®</sup>

Estimated percentage of transferrin hits in each framed cluster compared to total hits of transferrin of entire sub-fractions (cf. Fig. C). The analyzed fractions contained ~39% of all transferrin peptides of the sample.



| 2D-fraction<br>→ | 1 |   |   | 2 |   |   | 3 |   |   | 4 |   |   | 5 |   |   | 6 |   |   | 7 |   |   | 8 |   |   | 9 |   |   | 10 |   |   | 40 |   |   | MW<br>[kDa] |      |   |  |
|------------------|---|---|---|---|---|---|---|---|---|---|---|---|---|---|---|---|---|---|---|---|---|---|---|---|---|---|---|----|---|---|----|---|---|-------------|------|---|--|
| 1D-fraction<br>↓ | A | P | C | A | P | C | A | P | C | A | P | C | A | P | C | A | P | C | A | P | C | A | P | C | A | P | C | A  | P | C | A  | P | C | A           | P    | C |  |
| 15               |   |   |   |   |   |   |   |   |   |   |   |   |   |   |   |   |   |   |   |   |   |   |   |   |   |   |   |    |   |   |    |   |   |             | 1149 |   |  |
| 16               |   |   |   |   |   |   |   |   |   |   |   |   |   |   |   |   |   |   |   |   |   |   |   |   |   |   |   |    |   |   |    |   |   |             | 1090 |   |  |
| 17               |   |   |   |   |   |   |   |   |   |   |   |   |   |   |   |   |   |   |   |   |   |   |   |   |   |   |   |    |   |   |    |   |   |             | 1035 |   |  |
| 18               |   |   |   |   |   |   |   |   |   |   |   |   |   |   |   |   |   |   |   |   |   |   |   |   |   |   |   |    |   |   |    |   |   |             | 982  |   |  |
| 19               |   |   |   |   |   |   |   |   |   |   |   |   |   |   |   |   |   |   |   |   |   |   |   |   |   |   |   |    |   |   |    |   |   |             | 932  |   |  |
| 20               |   |   |   |   |   |   |   |   |   |   |   |   |   |   |   |   |   |   |   |   |   |   |   |   |   |   |   |    |   |   |    |   |   |             | 884  |   |  |
| 21               |   |   |   |   |   |   |   |   |   |   |   |   |   |   |   |   |   |   |   |   |   |   |   |   |   |   |   |    |   |   |    |   |   |             | 839  |   |  |
| 22               |   |   |   |   |   |   |   |   |   |   |   |   |   |   |   |   |   |   |   |   |   |   |   |   |   |   |   |    |   |   |    |   |   |             | 796  |   |  |
| 23               |   |   |   |   |   |   |   |   |   |   |   |   |   |   |   |   |   |   |   |   |   |   |   |   |   |   |   |    |   |   |    |   |   |             | 755  |   |  |
| 24               |   |   |   |   |   |   |   |   |   |   |   |   |   |   |   |   |   |   |   |   |   |   |   |   |   |   |   |    |   |   |    |   |   |             | 716  |   |  |
| 25               |   |   |   |   |   |   |   |   |   |   |   |   |   |   |   |   |   |   |   |   |   |   |   |   |   |   |   |    |   |   |    |   |   |             | 680  |   |  |
| 26               |   |   |   |   |   |   |   |   |   |   |   |   |   |   |   |   |   |   |   |   |   |   |   |   |   |   |   |    |   |   |    |   |   |             | 645  |   |  |
| 27               |   |   |   |   |   |   |   |   |   |   |   |   |   |   |   |   |   |   |   |   |   |   |   |   |   |   |   |    |   |   |    |   |   |             | 612  |   |  |
| 28               |   |   |   |   |   |   |   |   |   |   |   |   |   |   |   |   |   |   |   |   |   |   |   |   |   |   |   |    |   |   |    |   |   |             | 581  |   |  |
| 29               |   |   |   |   |   |   |   |   |   |   |   |   |   |   |   |   |   |   |   |   |   |   |   |   |   |   |   |    |   |   |    |   |   |             | 551  |   |  |
| 30               |   |   |   |   |   |   |   |   |   |   |   |   |   |   |   |   |   |   |   |   |   |   |   |   |   |   |   |    |   |   |    |   |   |             | 523  |   |  |
| 31               |   |   |   |   |   |   |   |   |   |   |   |   |   |   |   |   |   |   |   |   |   |   |   |   |   |   |   |    |   |   |    |   |   |             | 496  |   |  |
| 32               |   |   |   |   |   |   |   |   |   |   |   |   |   |   |   |   |   |   |   |   |   |   |   |   |   |   |   |    |   |   |    |   |   |             | 471  |   |  |
| 33               |   |   |   |   |   |   |   |   |   |   |   |   |   |   |   |   |   |   |   |   |   |   |   |   |   |   |   |    |   |   |    |   |   |             | 447  |   |  |
| 34               |   |   |   |   |   |   |   |   |   |   |   |   |   |   |   |   |   |   |   |   |   |   |   |   |   |   |   |    |   |   |    |   |   |             | 424  |   |  |
| 35               |   |   |   |   |   |   |   |   |   |   |   |   |   |   |   |   |   |   |   |   |   |   |   |   |   |   |   |    |   |   |    |   |   |             | 402  |   |  |
| 36               |   |   |   |   |   |   |   |   |   |   |   |   |   |   |   |   |   |   |   |   |   |   |   |   |   |   |   |    |   |   |    |   |   |             | 382  |   |  |
| 37               |   |   |   |   |   |   |   |   |   |   |   |   |   |   |   |   |   |   |   |   |   |   |   |   |   |   |   |    |   |   |    |   |   |             | 362  |   |  |
| 38               |   |   |   |   |   |   |   |   |   |   |   |   |   |   |   |   |   |   |   |   |   |   |   |   |   |   |   |    |   |   |    |   |   |             | 344  |   |  |
| 39               |   |   |   |   |   |   |   |   |   |   |   |   |   |   |   |   |   |   |   |   |   |   |   |   |   |   |   |    |   |   |    |   |   |             | 326  |   |  |
| 40               |   |   |   |   |   |   |   |   |   |   |   |   |   |   |   |   |   |   |   |   |   |   |   |   |   |   |   |    |   |   |    |   |   |             | 309  |   |  |
| 41               |   |   |   |   |   |   |   |   |   |   |   |   |   |   |   |   |   |   |   |   |   |   |   |   |   |   |   |    |   |   |    |   |   |             | 293  |   |  |
| 42               |   |   |   |   |   |   |   |   |   |   |   |   |   |   |   |   |   |   |   |   |   |   |   |   |   |   |   |    |   |   |    |   |   |             | 278  |   |  |
| 43               |   |   |   |   |   |   |   |   |   |   |   |   |   |   |   |   |   |   |   |   |   |   |   |   |   |   |   |    |   |   |    |   |   |             | 264  |   |  |
| 44               |   |   |   |   |   |   |   |   |   |   |   |   |   |   |   |   |   |   |   |   |   |   |   |   |   |   |   |    |   |   |    |   |   |             | 251  |   |  |
| 45               |   |   |   |   |   |   |   |   |   |   |   |   |   |   |   |   |   |   |   |   |   |   |   |   |   |   |   |    |   |   |    |   |   |             | 238  |   |  |
| 46               |   |   |   |   |   |   |   |   |   |   |   |   |   |   |   |   |   |   |   |   |   |   |   |   |   |   |   |    |   |   |    |   |   |             | 226  |   |  |
| 47               |   |   |   |   |   |   |   |   |   |   |   |   |   |   |   |   |   |   |   |   |   |   |   |   |   |   |   |    |   |   |    |   |   |             | 214  |   |  |
| 48               |   |   |   |   |   |   |   |   |   |   |   |   |   |   |   |   |   |   |   |   |   |   |   |   |   |   |   |    |   |   |    |   |   |             | 203  |   |  |
| 49               |   |   |   |   |   |   |   |   |   |   |   |   |   |   |   |   |   |   |   |   |   |   |   |   |   |   |   |    |   |   |    |   |   |             | 193  |   |  |
| 50               |   |   |   |   |   |   |   |   |   |   |   |   |   |   |   |   |   |   |   |   |   |   |   |   |   |   |   |    |   |   |    |   |   |             | 183  |   |  |
| 51               |   |   |   |   |   |   |   |   |   |   |   |   |   |   |   |   |   |   |   |   |   |   |   |   |   |   |   |    |   |   |    |   |   |             | 174  |   |  |
| 52               |   |   |   |   |   |   |   |   |   |   |   |   |   |   |   |   |   |   |   |   |   |   |   |   |   |   |   |    |   |   |    |   |   |             | 165  |   |  |
| 53               |   |   |   |   |   |   |   |   |   |   |   |   |   |   |   |   |   |   |   |   |   |   |   |   |   |   |   |    |   |   |    |   |   |             | 156  |   |  |
| 54               |   |   |   |   |   |   |   |   |   |   |   |   |   |   |   |   |   |   |   |   |   |   |   |   |   |   |   |    |   |   |    |   |   |             | 148  |   |  |
| 55               |   |   |   |   |   |   |   |   |   |   |   |   |   |   |   |   |   |   |   |   |   |   |   |   |   |   |   |    |   |   |    |   |   |             | 141  |   |  |
| 56               |   |   |   |   |   |   |   |   |   |   |   |   |   |   |   |   |   |   |   |   |   |   |   |   |   |   |   |    |   |   |    |   |   |             | 134  |   |  |
| 57               |   |   |   |   |   |   |   |   |   |   |   |   |   |   |   |   |   |   |   |   |   |   |   |   |   |   |   |    |   |   |    |   |   |             | 127  |   |  |
| 58               |   |   |   |   |   |   |   |   |   |   |   |   |   |   |   |   |   |   |   |   |   |   |   |   |   |   |   |    |   |   |    |   |   |             | 120  |   |  |
| 59               |   |   |   |   |   |   |   |   |   |   |   |   |   |   |   |   |   |   |   |   |   |   |   |   |   |   |   |    |   |   |    |   |   |             | 114  |   |  |
| 60               |   |   |   |   |   |   |   |   |   |   |   |   |   |   |   |   |   |   |   |   |   |   |   |   |   |   |   |    |   |   |    |   |   |             | 108  |   |  |
| 61               |   |   |   |   |   |   |   |   |   |   |   |   |   |   |   |   |   |   |   |   |   |   |   |   |   |   |   |    |   |   |    |   |   |             | 103  |   |  |
| 62               |   |   |   |   |   |   |   |   |   |   |   |   |   |   |   |   |   |   |   |   |   |   |   |   |   |   |   |    |   |   |    |   |   |             | 97   |   |  |
| 63               |   |   |   |   |   |   |   |   |   |   |   |   |   |   |   |   |   |   |   |   |   |   |   |   |   |   |   |    |   |   |    |   |   |             | 92   |   |  |
| 64               |   |   |   |   |   |   |   |   |   |   |   |   |   |   |   |   |   |   |   |   |   |   |   |   |   |   |   |    |   |   |    |   |   |             | 88   |   |  |
| 65               |   |   |   |   |   |   |   |   |   |   |   |   |   |   |   |   |   |   |   |   |   |   |   |   |   |   |   |    |   |   |    |   |   |             | 83   |   |  |
| 66               |   |   |   |   |   |   |   |   |   |   |   |   |   |   |   |   |   |   |   |   |   |   |   |   |   |   |   |    |   |   |    |   |   |             | 79   |   |  |
| 67               |   |   |   |   |   |   |   |   |   |   |   |   |   |   |   |   |   |   |   |   |   |   |   |   |   |   |   |    |   |   |    |   |   |             | 75   |   |  |
| 68               |   |   |   |   |   |   |   |   |   |   |   |   |   |   |   |   |   |   |   |   |   |   |   |   |   |   |   |    |   |   |    |   |   |             | 71   |   |  |
| 69               |   |   |   |   |   |   |   |   |   |   |   |   |   |   |   |   |   |   |   |   |   |   |   |   |   |   |   |    |   |   |    |   |   |             | 67   |   |  |
| 70               |   |   |   |   |   |   |   |   |   |   |   |   |   |   |   |   |   |   |   |   |   |   |   |   |   |   |   |    |   |   |    |   |   |             | 64   |   |  |
| 71               |   |   |   |   |   |   |   |   |   |   |   |   |   |   |   |   |   |   |   |   |   |   |   |   |   |   |   |    |   |   |    |   |   |             | 61   |   |  |
| 72               |   |   |   |   |   |   |   |   |   |   |   |   |   |   |   |   |   |   |   |   |   |   |   |   |   |   |   |    |   |   |    |   |   |             | 58   |   |  |
| 73               |   |   |   |   |   |   |   |   |   |   |   |   |   |   |   |   |   |   |   |   |   |   |   |   |   |   |   |    |   |   |    |   |   |             | 55   |   |  |
| 74               |   |   |   |   |   |   |   |   |   |   |   |   |   |   |   |   |   |   |   |   |   |   |   |   |   |   |   |    |   |   |    |   |   |             | 52   |   |  |
| 75               |   |   |   |   |   |   |   |   |   |   |   |   |   |   |   |   |   |   |   |   |   |   |   |   |   |   |   |    |   |   |    |   |   |             | 49   |   |  |
| 76               |   |   |   |   |   |   |   |   |   |   |   |   |   |   |   |   |   |   |   |   |   |   |   |   |   |   |   |    |   |   |    |   |   |             | 47   |   |  |

**B**

91 0,39  
121 0,59  
131 0,65  
32 0,23  
58 0,37  
50 0,35

708 0,76  
1119 0,75  
1081 0,80  
1013 0,75  
684 0,80

32 0,20

80 0,44  
111 0,52

| 2D-fraction<br>→ | 1 |   |   | 2 |   |   | 3 |   |   | 4 |   |   | 5 |   |   | 6 |   |   | 7 |   |   | 8 |   |   | 9 |   |   | 10 |   |   | 40 |   |      | MW<br>[kDa] |
|------------------|---|---|---|---|---|---|---|---|---|---|---|---|---|---|---|---|---|---|---|---|---|---|---|---|---|---|---|----|---|---|----|---|------|-------------|
|                  | R | P | H | R | P | H | R | P | H | R | P | H | R | P | H | R | P | H | R | P | H | R | P | H | R | P | H | R  | P | H | R  | P | H    |             |
| 15               |   |   |   |   |   |   |   |   |   |   |   |   |   |   |   |   |   |   |   |   |   |   |   |   |   |   |   |    |   |   |    |   | 1149 |             |
| 16               |   |   |   |   |   |   |   |   |   |   |   |   |   |   |   |   |   |   |   |   |   |   |   |   |   |   |   |    |   |   |    |   | 1090 |             |
| 17               |   |   |   |   |   |   |   |   |   |   |   |   |   |   |   |   |   |   |   |   |   |   |   |   |   |   |   |    |   |   |    |   | 1035 |             |
| 18               |   |   |   |   |   |   |   |   |   |   |   |   |   |   |   |   |   |   |   |   |   |   |   |   |   |   |   |    |   |   |    |   | 982  |             |
| 19               |   |   |   |   |   |   |   |   |   |   |   |   |   |   |   |   |   |   |   |   |   |   |   |   |   |   |   |    |   |   |    |   | 932  |             |
| 20               |   |   |   |   |   |   |   |   |   |   |   |   |   |   |   |   |   |   |   |   |   |   |   |   |   |   |   |    |   |   |    |   | 884  |             |
| 21               |   |   |   |   |   |   |   |   |   |   |   |   |   |   |   |   |   |   |   |   |   |   |   |   |   |   |   |    |   |   |    |   | 839  |             |
| 22               |   |   |   |   |   |   |   |   |   |   |   |   |   |   |   |   |   |   |   |   |   |   |   |   |   |   |   |    |   |   |    |   | 796  |             |
| 23               |   |   |   |   |   |   |   |   |   |   |   |   |   |   |   |   |   |   |   |   |   |   |   |   |   |   |   |    |   |   |    |   | 755  |             |
| 24               |   |   |   |   |   |   |   |   |   |   |   |   |   |   |   |   |   |   |   |   |   |   |   |   |   |   |   |    |   |   |    |   | 716  |             |
| 25               |   |   |   |   |   |   |   |   |   |   |   |   |   |   |   |   |   |   |   |   |   |   |   |   |   |   |   |    |   |   |    |   | 680  |             |
| 26               |   |   |   |   |   |   |   |   |   |   |   |   |   |   |   |   |   |   |   |   |   |   |   |   |   |   |   |    |   |   |    |   | 645  |             |
| 27               |   |   |   |   |   |   |   |   |   |   |   |   |   |   |   |   |   |   |   |   |   |   |   |   |   |   |   |    |   |   |    |   | 612  |             |
| 28               |   |   |   |   |   |   |   |   |   |   |   |   |   |   |   |   |   |   |   |   |   |   |   |   |   |   |   |    |   |   |    |   | 581  |             |
| 29               |   |   |   |   |   |   |   |   |   |   |   |   |   |   |   |   |   |   |   |   |   |   |   |   |   |   |   |    |   |   |    |   | 551  |             |
| 30               |   |   |   |   |   |   |   |   |   |   |   |   |   |   |   |   |   |   |   |   |   |   |   |   |   |   |   |    |   |   |    |   | 523  |             |
| 31               |   |   |   |   |   |   |   |   |   |   |   |   |   |   |   |   |   |   |   |   |   |   |   |   |   |   |   |    |   |   |    |   | 496  |             |
| 32               |   |   |   |   |   |   |   |   |   |   |   |   |   |   |   |   |   |   |   |   |   |   |   |   |   |   |   |    |   |   |    |   | 471  |             |
| 33               |   |   |   |   |   |   |   |   |   |   |   |   |   |   |   |   |   |   |   |   |   |   |   |   |   |   |   |    |   |   |    |   | 447  |             |
| 34               |   |   |   |   |   |   |   |   |   |   |   |   |   |   |   |   |   |   |   |   |   |   |   |   |   |   |   |    |   |   |    |   | 424  |             |
| 35               |   |   |   |   |   |   |   |   |   |   |   |   |   |   |   |   |   |   |   |   |   |   |   |   |   |   |   |    |   |   |    |   | 402  |             |
| 36               |   |   |   |   |   |   |   |   |   |   |   |   |   |   |   |   |   |   |   |   |   |   |   |   |   |   |   |    |   |   |    |   | 382  |             |
| 37               |   |   |   |   |   |   |   |   |   |   |   |   |   |   |   |   |   |   |   |   |   |   |   |   |   |   |   |    |   |   |    |   | 362  |             |
| 38               |   |   |   |   |   |   |   |   |   |   |   |   |   |   |   |   |   |   |   |   |   |   |   |   |   |   |   |    |   |   |    |   | 344  |             |
| 39               |   |   |   |   |   |   |   |   |   |   |   |   |   |   |   |   |   |   |   |   |   |   |   |   |   |   |   |    |   |   |    |   | 326  |             |
| 40               |   |   |   |   |   |   |   |   |   |   |   |   |   |   |   |   |   |   |   |   |   |   |   |   |   |   |   |    |   |   |    |   | 309  |             |
| 41               |   |   |   |   |   |   |   |   |   |   |   |   |   |   |   |   |   |   |   |   |   |   |   |   |   |   |   |    |   |   |    |   | 293  |             |
| 42               |   |   |   |   |   |   |   |   |   |   |   |   |   |   |   |   |   |   |   |   |   |   |   |   |   |   |   |    |   |   |    |   | 278  |             |
| 43               |   |   |   |   |   |   |   |   |   |   |   |   |   |   |   |   |   |   |   |   |   |   |   |   |   |   |   |    |   |   |    |   | 264  |             |
| 44               |   |   |   |   |   |   |   |   |   |   |   |   |   |   |   |   |   |   |   |   |   |   |   |   |   |   |   |    |   |   |    |   | 251  |             |
| 45               |   |   |   |   |   |   |   |   |   |   |   |   |   |   |   |   |   |   |   |   |   |   |   |   |   |   |   |    |   |   |    |   | 238  |             |
| 46               |   |   |   |   |   |   |   |   |   |   |   |   |   |   |   |   |   |   |   |   |   |   |   |   |   |   |   |    |   |   |    |   | 226  |             |
| 47               |   |   |   |   |   |   |   |   |   |   |   |   |   |   |   |   |   |   |   |   |   |   |   |   |   |   |   |    |   |   |    |   | 214  |             |
| 48               |   |   |   |   |   |   |   |   |   |   |   |   |   |   |   |   |   |   |   |   |   |   |   |   |   |   |   |    |   |   |    |   | 203  |             |
| 49               |   |   |   |   |   |   |   |   |   |   |   |   |   |   |   |   |   |   |   |   |   |   |   |   |   |   |   |    |   |   |    |   | 193  |             |
| 50               |   |   |   |   |   |   |   |   |   |   |   |   |   |   |   |   |   |   |   |   |   |   |   |   |   |   |   |    |   |   |    |   | 183  |             |
| 51               |   |   |   |   |   |   |   |   |   |   |   |   |   |   |   |   |   |   |   |   |   |   |   |   |   |   |   |    |   |   |    |   | 174  |             |
| 52               |   |   |   |   |   |   |   |   |   |   |   |   |   |   |   |   |   |   |   |   |   |   |   |   |   |   |   |    |   |   |    |   | 165  |             |
| 53               |   |   |   |   |   |   |   |   |   |   |   |   |   |   |   |   |   |   |   |   |   |   |   |   |   |   |   |    |   |   |    |   | 156  |             |
| 54               |   |   |   |   |   |   |   |   |   |   |   |   |   |   |   |   |   |   |   |   |   |   |   |   |   |   |   |    |   |   |    |   | 148  |             |
| 55               |   |   |   |   |   |   |   |   |   |   |   |   |   |   |   |   |   |   |   |   |   |   |   |   |   |   |   |    |   |   |    |   | 141  |             |
| 56               |   |   |   |   |   |   |   |   |   |   |   |   |   |   |   |   |   |   |   |   |   |   |   |   |   |   |   |    |   |   |    |   | 134  |             |
| 57               |   |   |   |   |   |   |   |   |   |   |   |   |   |   |   |   |   |   |   |   |   |   |   |   |   |   |   |    |   |   |    |   | 127  |             |
| 58               |   |   |   |   |   |   |   |   |   |   |   |   |   |   |   |   |   |   |   |   |   |   |   |   |   |   |   |    |   |   |    |   | 120  |             |
| 59               |   |   |   |   |   |   |   |   |   |   |   |   |   |   |   |   |   |   |   |   |   |   |   |   |   |   |   |    |   |   |    |   | 114  |             |
| 60               |   |   |   |   |   |   |   |   |   |   |   |   |   |   |   |   |   |   |   |   |   |   |   |   |   |   |   |    |   |   |    |   | 108  |             |
| 61               |   |   |   |   |   |   |   |   |   |   |   |   |   |   |   |   |   |   |   |   |   |   |   |   |   |   |   |    |   |   |    |   | 103  |             |
| 62               |   |   |   |   |   |   |   |   |   |   |   |   |   |   |   |   |   |   |   |   |   |   |   |   |   |   |   |    |   |   |    |   | 97   |             |
| 63               |   |   |   |   |   |   |   |   |   |   |   |   |   |   |   |   |   |   |   |   |   |   |   |   |   |   |   |    |   |   |    |   | 92   |             |
| 64               |   |   |   |   |   |   |   |   |   |   |   |   |   |   |   |   |   |   |   |   |   |   |   |   |   |   |   |    |   |   |    |   | 88   |             |
| 65               |   |   |   |   |   |   |   |   |   |   |   |   |   |   |   |   |   |   |   |   |   |   |   |   |   |   |   |    |   |   |    |   | 83   |             |
| 66               |   |   |   |   |   |   |   |   |   |   |   |   |   |   |   |   |   |   |   |   |   |   |   |   |   |   |   |    |   |   |    |   | 79   |             |
| 67               |   |   |   |   |   |   |   |   |   |   |   |   |   |   |   |   |   |   |   |   |   |   |   |   |   |   |   |    |   |   |    |   | 75   |             |
| 68               |   |   |   |   |   |   |   |   |   |   |   |   |   |   |   |   |   |   |   |   |   |   |   |   |   |   |   |    |   |   |    |   | 71   |             |
| 69               |   |   |   |   |   |   |   |   |   |   |   |   |   |   |   |   |   |   |   |   |   |   |   |   |   |   |   |    |   |   |    |   | 67   |             |
| 70               |   |   |   |   |   |   |   |   |   |   |   |   |   |   |   |   |   |   |   |   |   |   |   |   |   |   |   |    |   |   |    |   | 64   |             |
| 71               |   |   |   |   |   |   |   |   |   |   |   |   |   |   |   |   |   |   |   |   |   |   |   |   |   |   |   |    |   |   |    |   | 61   |             |
| 72               |   |   |   |   |   |   |   |   |   |   |   |   |   |   |   |   |   |   |   |   |   |   |   |   |   |   |   |    |   |   |    |   | 58   |             |
| 73               |   |   |   |   |   |   |   |   |   |   |   |   |   |   |   |   |   |   |   |   |   |   |   |   |   |   |   |    |   |   |    |   | 55   |             |
| 74               |   |   |   |   |   |   |   |   |   |   |   |   |   |   |   |   |   |   |   |   |   |   |   |   |   |   |   |    |   |   |    |   | 52   |             |
| 75               |   |   |   |   |   |   |   |   |   |   |   |   |   |   |   |   |   |   |   |   |   |   |   |   |   |   |   |    |   |   |    |   | 49   |             |
| 76               |   |   |   |   |   |   |   |   |   |   |   |   |   |   |   |   |   |   |   |   |   |   |   |   |   |   |   |    |   |   |    |   | 47   |             |

C

0,030 18 120  
0,010 37 188  
0,198 34 201

3,39 25 101  
0,873 18 79  
2,25 18 79

0,003 30 151  
0,151 24 116  
0,381 32 186

24,3 26 77  
6,71 7 22

2,29 22 126  
2,97 30 143



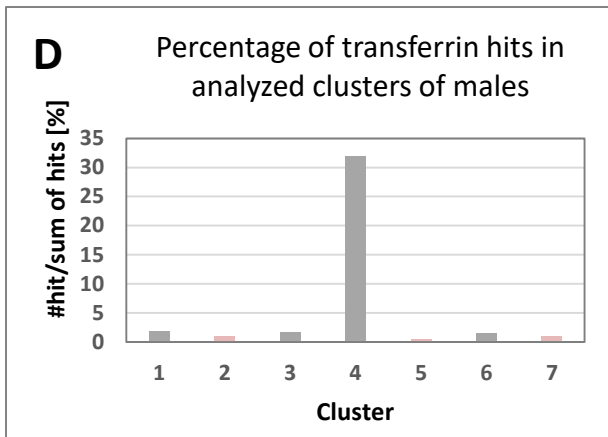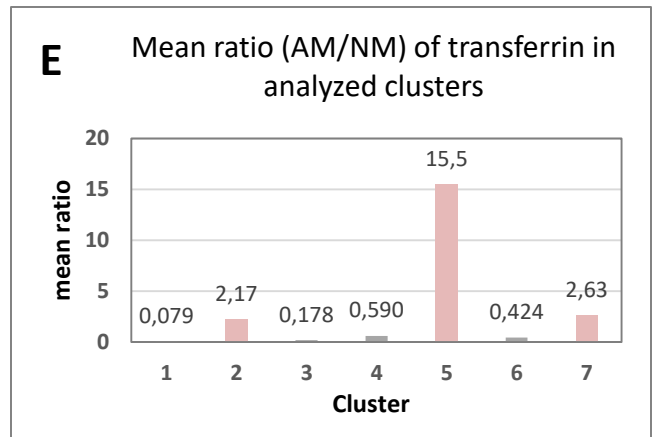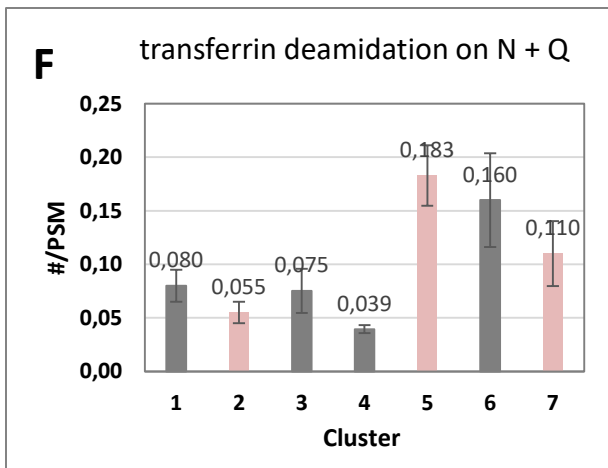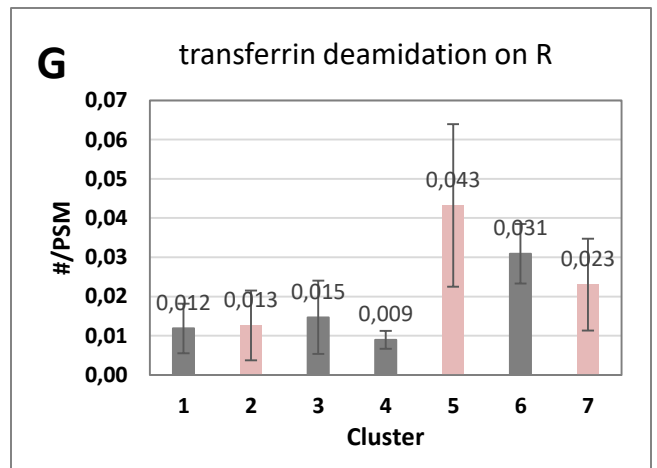

**D-G:** Grey filling: transferrin protein concentration is lower in AM in comparison to NM (ratios <1.0); red filling: protein concentration is higher in AM in comparison to NM due to the ratios calculated by Sieve (ratios >2, Fig. E).

The mean ratio was built from all sub-fractions of one cluster.

The main cluster 4 of transferrin (Fig. D) showed a ratio of ~0.6 (Fig. E) like the minor clusters 1, 3, and 6 (<0.5). This is in accordance with the known alteration direction of this APR under inflammation. Surprisingly, there were three minor clusters (2, 5, and 7) 2 to 15-fold increased under AS.

### **F, G: Deamidation rates of transferrin of proteoforms identified**

The search for PTM ran successively using Proteome Discoverer<sup>®</sup> 1.3 (Thermo) with no more than three dynamic modification types per run. We considered only highly confident database matches when the sequence coverage was >40%. The following dynamic modifications of amino acids were analyzed: deamidation (N, Q, R) and carbamoyl (K, M, R). Multi reports of the related replicates were utilized.

Mean values of the modification rates, #PTM/PSM of transferrin peptides were determined including the homologous sub-fractions from all animals AM, NM, CF, and NF (cf. Fig. A-C).

The minor clusters (5, 7), which are elevated under AS, showed much higher deamidation rates than the main cluster and lower clusters under AS. Practically, no carbamoylation was found.

**Supplementary Table S1:**

**Specification of ELISA-Test kits applied to dog and human samples**

| <b>Measurements in dog samples</b>  |                 |                 |                |                 |
|-------------------------------------|-----------------|-----------------|----------------|-----------------|
| <b>Antigen</b>                      | <b>Supplier</b> | <b>Code</b>     | <b>Species</b> | <b>Function</b> |
| kallikrein                          |                 | KTE20170        | dog            | n               |
| vitronectin                         |                 | KTE20161        | dog            | n               |
| dynein                              |                 | KTE20163        | dog            | n               |
| hyaluronan binding protein 2        |                 | KTE20164        | dog            | n               |
| fukutin                             | Abbkine         | KTE20171        | dog            | n               |
| myosin IXA                          |                 | KTE20175        | dog            | n               |
| collagen 1 alpha 1                  |                 | KTE20165        | dog            | n               |
| collagen 1 alpha 2                  |                 | KTE20166        | dog            | n               |
| collagen 13 alpha 1                 |                 | KTE20169        | dog            | n               |
| formin 1                            |                 | KTE20173        | dog            | n               |
| talin-1                             | CUSABIO         | CSB-EL023597HU  | man            | n               |
| Serum amyloid A                     | Genorise        | GR115278        | dog            | n               |
| leucin rich alpha-2-glycoprotein 1  |                 | MBS075175       | dog            | y               |
| gelsolin                            |                 | MBS2603447      | dog            | y               |
| adiponectin                         |                 | MBS778758       | dog            | n               |
| adiponectin                         |                 | MBS080454       | cat            | y               |
| lumican                             | MyBioSource     | MBS2607240      | dog            | y               |
| procollagen I C-terminal propeptide |                 | MBS2608196      | dog            | y               |
| talin-1                             |                 | MBS2604628      | dog            | y               |
| serum amyloid                       |                 | MBS740421       | dog            | y               |
| serum amyloid                       |                 | MBS1602508      | dog            | y               |
| lumican                             | Cloud-Clone     | USC-SEB496HU    | man            | y               |
| collagen type 13                    |                 | SEC138HU        | man            | y               |
| vitronectin                         | RayBiotech:     | ELH-VTN         | man            | y               |
| adiponectin                         |                 | RD19102310      | man            | y               |
| TGFβ1                               | Biovendor       | BVD-RAF122R     | man            | y               |
| adiponectin                         |                 | BVD-RD191023100 | man            | y               |

**Measurement in dog samples:** When no dog-specific or reliable kit was available, we applied assays of other species-specificity due to the high sequence similarities. Out of the checked kits those marked by yes (y) produced reliable antigen concentrations. The other kits either were not able to detect the proteoform naturally occurring in our samples or were not sensitive enough.

| Measurements in human samples       |             |                         |         |          |
|-------------------------------------|-------------|-------------------------|---------|----------|
| Antigen                             | Supplier    | Code                    | Species | Function |
| angiotensinogen                     | Abbexa      | abx573778               | man     | y        |
| formin 1                            |             | abx387383               | man     | y        |
| alpha-1-acid glycoprotein           |             | HEA816Hu                | man     | y        |
| coagulation factor XIII B           |             | CEB613Hu                | man     | y        |
| complement C1q                      |             | SEA747Hu                | man     | y        |
| complement factor H                 |             | SEA635Hu                | man     | y        |
| complement factor I                 |             | SEB978Hu                | man     | y        |
| collagen type XIII                  |             | SEC138Hu                | man     | y        |
| c-reactive protein                  |             | SEA821Hu                | man     | y        |
| fibronectin                         | Cloud-Clone | USC-HEA037HU            | man     | y        |
| ficolin                             |             | SEA786Hu                | man     | y        |
| hemopexin                           |             | SEB986HU                | man     | y        |
| gelsolin                            |             | SEA372Hu                | man     | y        |
| C4 binding protein alpha            |             | SEB620Hu                | man     | y        |
| retinol binding protein 4           |             | SEA929Hu                | man     | y        |
| talin                               |             | SEA278Hu                | man     | y        |
| leucine rich alpha-2-glycoprotein 1 |             | HEB934Hu high sensitive | man     | y        |
| lumican                             |             | ELH-LUM-1               | man     | y        |
| serum amyloid A                     | RayBiotech  | ELH-SAA-1               | man     | y        |
| vitronectin                         |             | (ELH-VTN                | man     | y        |
| carboxyterminal propeptide of       |             | CSB-E08079h             | man     | y        |
| fibrinogen gamma chain              |             | CSB-E13319h             | man     | y        |
| alpha-trypsin inhibitor heavy chain | CUSBIO      | CSB-E17022h             | man     | y        |
| hyaluronan-binding protein 2        |             | CSB-EL010113HU          | man     | y        |
| complement component C9             |             | CSB-E14011h             | man     | y        |
| serum amyloid A                     | Boster      | BOS-EK1544, SAA/SAA1    | man     | y        |
| TGF $\beta$ 1                       | Biovendor   | BVD-RAF122R*            | man     | y        |
| adiponectin                         |             | BVD-RD191023100*        | man     | y        |

**Measurement in human samples:** The kits were performed according the suppliers instructions with the following modifications: all assays from Cloud-Clone and CUSBIO were performed with double incubation times. Samples were pre-incubated with 0.5% Tween 20 before measurement of gelsolin. For the quantification of PICP, TGF $\beta$ 1, and CRP in urine either incubation times were prolonged or concentrated specimens were applied. For that samples have been concentrated in Amicon® Ultra - 15 Centrifugal filters (3K, UFC900324) by ~10 to ~60 fold depending on the starting volume available.

**Table S2: List of protein chains identified by the Proteome Discoverer® in four sample pools of blood plasma from dogs**

Mass spectrometric data are: Accession number (SwissProt); Description (annotation);

ΣCoverage (sequence coverage); Σ# Proteins (number of distinct proteins assigned to the identified sequences);

Σ# Unique Peptides (singular peptides assigned to the protein); Σ# Peptides (entire peptide count including repeatedly found peptides); Σ# PSMs.

By mass spectrometry, 3115 (443) proteins in total were identified with the Proteome Discoverer® supported by ≥ 1 (≥ 2) peptide/s, respectively.

| Accession  | Description                                                                                                  | ΣCoverage | Σ# Proteins | Σ# Unique Pe | Σ# Peptides | Σ# PSMs |
|------------|--------------------------------------------------------------------------------------------------------------|-----------|-------------|--------------|-------------|---------|
| F1P8Z5     | Apolipoprotein B OS=Canis lupus familiaris GN=APOB PE=4 SV=1 - [F1P8Z5_CANLF]                                | 66,12     | 1           | 239          | 245         | 3734    |
| F1PIX8     | Complement C3 OS=Canis lupus familiaris GN=C3 PE=4 SV=2 - [F1PIX8_CANLF]                                     | 72,98     | 1           | 23           | 98          | 1730    |
| J9PBN6     | Uncharacterized protein OS=Canis lupus familiaris GN=LOC611458 PE=4 SV=1 - [J9PBN6_CANLF]                    | 70,91     | 1           | 14           | 81          | 2455    |
| J9P430     | Transferrin OS=Canis lupus familiaris GN=TF PE=3 SV=1 - [J9P430_CANLF]                                       | 80,29     | 1           | 32           | 76          | 7792    |
| J9P8M2     | Fibronectin OS=Canis lupus familiaris GN=FN1 PE=4 SV=1 - [J9P8M2_CANLF]                                      | 51,55     | 1           | 2            | 73          | 766     |
| F6UMEO     | Alpha-2-macroglobulin OS=Canis lupus familiaris GN=A2M PE=4 SV=1 - [F6UMEO_CANLF]                            | 65,9      | 1           | 71           | 71          | 2430    |
| F1P6H7     | Fibronectin OS=Canis lupus familiaris GN=FN1 PE=4 SV=2 - [F1P6H7_CANLF]                                      | 46,21     | 1           | 0            | 71          | 763     |
| J9NTL7     | Uncharacterized protein OS=Canis lupus familiaris GN=CFH PE=4 SV=1 - [J9NTL7_CANLF]                          | 65,77     | 1           | 53           | 64          | 1387    |
| E2RS80     | Uncharacterized protein OS=Canis lupus familiaris GN=CFB PE=3 SV=2 - [E2RS80_CANLF]                          | 55,99     | 1           | 30           | 61          | 1354    |
| F6UMP8     | Uncharacterized protein OS=Canis lupus familiaris GN=LOC611458 PE=4 SV=1 - [F6UMP8_CANLF]                    | 53,07     | 1           | 2            | 59          | 322     |
| F1PGM1     | Complement C3 OS=Canis lupus familiaris GN=C3 PE=4 SV=2 - [F1PGM1_CANLF]                                     | 46,23     | 1           | 0            | 53          | 370     |
| F1PWR2     | Uncharacterized protein OS=Canis lupus familiaris GN=TF PE=4 SV=2 - [F1PWR2_CANLF]                           | 45,07     | 1           | 27           | 50          | 283     |
| F1Q421     | Plasminogen OS=Canis lupus familiaris GN=PLG PE=3 SV=2 - [F1Q421_CANLF]                                      | 71,18     | 1           | 15           | 49          | 1588    |
| P49822     | Serum albumin OS=Canis lupus familiaris GN=ALB PE=1 SV=3 - [ALBU_CANLF]                                      | 75,99     | 1           | 2            | 47          | 402     |
| F2Z4Q6     | Serum albumin OS=Canis lupus familiaris GN=ALB PE=3 SV=1 - [F2Z4Q6_CANLF]                                    | 75,99     | 1           | 2            | 47          | 641     |
| F1PN98     | Coagulation factor V OS=Canis lupus familiaris GN=F5 PE=3 SV=2 - [F1PN98_CANLF]                              | 26,15     | 1           | 45           | 45          | 439     |
| F1PDJ5     | Apolipoprotein A-I OS=Canis lupus familiaris GN=APOA1 PE=3 SV=1 - [F1PDJ5_CANLF]                             | 85,34     | 1           | 15           | 41          | 1930    |
| Q28295     | von Willebrand factor OS=Canis lupus familiaris GN=VWF PE=1 SV=2 - [VWVF_CANLF]                              | 22,75     | 1           | 0            | 41          | 237     |
| F5XV80     | von Willebrand factor OS=Canis lupus familiaris GN=VWF PE=2 SV=1 - [F5XV80_CANLF]                            | 22,75     | 1           | 0            | 41          | 237     |
| G1K2B9     | von Willebrand factor OS=Canis lupus familiaris GN=VWF PE=4 SV=1 - [G1K2B9_CANLF]                            | 22,75     | 1           | 0            | 41          | 237     |
| F1PBL4     | Fibrinogen alpha chain OS=Canis lupus familiaris GN=FGA PE=4 SV=1 - [F1PBL4_CANLF]                           | 38,12     | 1           | 8            | 40          | 990     |
| F6V1W9     | Transferrin OS=Canis lupus familiaris GN=TF PE=4 SV=1 - [F6V1W9_CANLF]                                       | 39,06     | 1           | 1            | 38          | 537     |
| A0A219Y8W3 | von Willebrand factor OS=Canis lupus familiaris GN=VWF PE=2 SV=1 - [A0A219Y8W3_CANLF]                        | 18,59     | 1           | 0            | 35          | 174     |
| F1PZR4     | Hemopexin OS=Canis lupus familiaris GN=HPX PE=3 SV=2 - [F1PZR4_CANLF]                                        | 75,33     | 1           | 34           | 34          | 2201    |
| F1PW65     | Fibrinogen beta chain OS=Canis lupus familiaris GN=FBG PE=4 SV=2 - [F1PW65_CANLF]                            | 75,15     | 1           | 1            | 34          | 1156    |
| F1P8G0     | Fibrinogen gamma chain OS=Canis lupus familiaris GN=FGG PE=4 SV=2 - [F1P8G0_CANLF]                           | 81,24     | 1           | 29           | 31          | 1008    |
| P19006     | Haptoglobin OS=Canis lupus familiaris GN=HP PE=1 SV=2 - [HPT_CANLF]                                          | 78,72     | 1           | 0            | 28          | 1300    |
| G1K2D9     | Haptoglobin OS=Canis lupus familiaris GN=LOC479668 PE=3 SV=1 - [G1K2D9_CANLF]                                | 74,64     | 1           | 0            | 28          | 1242    |
| F1Q117     | Attractin OS=Canis lupus familiaris GN=ATRN PE=4 SV=2 - [F1Q117_CANLF]                                       | 26,53     | 1           | 23           | 28          | 239     |
| E2RS79     | Uncharacterized protein OS=Canis lupus familiaris GN=CFB PE=3 SV=2 - [E2RS79_CANLF]                          | 42,05     | 1           | 7            | 27          | 291     |
| J9NRV7     | Fibrinogen alpha chain OS=Canis lupus familiaris GN=FGA PE=4 SV=1 - [J9NRV7_CANLF]                           | 31,71     | 1           | 0            | 27          | 298     |
| F1PGS2     | Fibrinogen beta chain OS=Canis lupus familiaris GN=FBG PE=4 SV=2 - [F1PGS2_CANLF]                            | 66,6      | 1           | 0            | 26          | 498     |
| E2QZQ1     | Uncharacterized protein OS=Canis lupus familiaris GN=TF PE=3 SV=1 - [E2QZQ1_CANLF]                           | 47,66     | 1           | 8            | 26          | 374     |
| Q076A4     | Myosin-8 OS=Canis lupus familiaris GN=MYH8 PE=3 SV=1 - [MYH8_CANLF]                                          | 17,79     | 1           | 0            | 26          | 55      |
| E2R7A3     | Complement factor I OS=Canis lupus familiaris GN=CFI PE=3 SV=2 - [E2R7A3_CANLF]                              | 57,88     | 1           | 4            | 25          | 703     |
| P02648     | Apolipoprotein A-I OS=Canis lupus familiaris GN=APOA1 PE=1 SV=2 - [APOA1_CANLF]                              | 68,42     | 1           | 1            | 23          | 438     |
| E2RCC8     | Immunoglobulin heavy constant mu OS=Canis lupus familiaris GN=IGHM PE=4 SV=2 - [E2RCC8_CANLF]                | 55,18     | 1           | 4            | 22          | 2838    |
| F1PY40     | Complement factor I OS=Canis lupus familiaris GN=CFI PE=4 SV=2 - [F1PY40_CANLF]                              | 46,9      | 1           | 2            | 22          | 672     |
| F1PGM9     | Complement component 4 binding protein alpha OS=Canis lupus familiaris GN=C4BPA PE=4 SV=2 - [F1PGM9_C]       | 56,61     | 1           | 21           | 21          | 314     |
| E2RE76     | Apolipoprotein A-IV OS=Canis lupus familiaris GN=APOA4 PE=3 SV=2 - [APOA4_CANLF]                             | 53,97     | 1           | 21           | 21          | 301     |
| F1P7J4     | Complement C5 OS=Canis lupus familiaris GN=C5 PE=4 SV=2 - [F1P7J4_CANLF]                                     | 21,14     | 1           | 21           | 21          | 58      |
| E2R4V3     | Serpin family F member 2 OS=Canis lupus familiaris GN=SERPINF2 PE=3 SV=1 - [E2R4V3_CANLF]                    | 54,99     | 1           | 20           | 20          | 338     |
| F1P903     | Complement C1r OS=Canis lupus familiaris GN=C1R PE=3 SV=2 - [F1P903_CANLF]                                   | 41,99     | 1           | 0            | 20          | 137     |
| F1PNG7     | Complement C1r OS=Canis lupus familiaris GN=C1R PE=3 SV=2 - [F1PNG7_CANLF]                                   | 41,17     | 1           | 0            | 20          | 137     |
| F1Q418     | Inter-alpha-trypsin inhibitor heavy chain 1 OS=Canis lupus familiaris GN=ITH1 PE=4 SV=2 - [F1Q418_CANLF]     | 35,16     | 1           | 20           | 20          | 101     |
| P80009     | Plasminogen (Fragment) OS=Canis lupus familiaris GN=PLG PE=1 SV=1 - [PLMN_CANLF]                             | 80,18     | 1           | 0            | 19          | 126     |
| J9PAD1     | Uncharacterized protein OS=Canis lupus familiaris GN=LOC484960 PE=4 SV=2 - [J9PAD1_CANLF]                    | 22,01     | 1           | 0            | 18          | 75      |
| P33703     | Beta-2-glycoprotein 1 OS=Canis lupus familiaris GN=APOH PE=2 SV=1 - [APOH_CANLF]                             | 53,33     | 1           | 17           | 17          | 789     |
| F1PG39     | Inter-alpha-trypsin inhibitor heavy chain 2 OS=Canis lupus familiaris GN=ITH2 PE=4 SV=2 - [F1PG39_CANLF]     | 33,86     | 1           | 17           | 17          | 81      |
| H9GWY3     | Inter-alpha-trypsin inhibitor heavy chain member 4 OS=Canis lupus familiaris GN=ITH4 PE=4 SV=2 - [H9C]       | 25,36     | 1           | 12           | 17          | 50      |
| F1P707     | Uncharacterized protein OS=Canis lupus familiaris GN=LOC484960 PE=4 SV=2 - [F1P707_CANLF]                    | 17,94     | 1           | 17           | 17          | 42      |
| E2QZ19     | Afamin OS=Canis lupus familiaris GN=AFM PE=3 SV=1 - [E2QZ19_CANLF]                                           | 37,87     | 1           | 0            | 16          | 38      |
| E2R4E7     | Afamin OS=Canis lupus familiaris GN=AFM PE=3 SV=2 - [E2R4E7_CANLF]                                           | 37,5      | 1           | 0            | 16          | 38      |
| F1PQ85     | Mannan binding lectin serine peptidase 1 OS=Canis lupus familiaris GN=MASP1 PE=3 SV=2 - [F1PQ85_CANLF]       | 30,67     | 1           | 7            | 16          | 137     |
| F1PP08     | Dipeptidyl peptidase 4 OS=Canis lupus familiaris GN=DPP4 PE=4 SV=2 - [F1PP08_CANLF]                          | 20,83     | 1           | 14           | 15          | 65      |
| F1PUM6     | Vitronectin OS=Canis lupus familiaris GN=VTN PE=4 SV=1 - [F1PUM6_CANLF]                                      | 31,06     | 1           | 13           | 15          | 278     |
| P60524     | Hemoglobin subunit beta OS=Canis lupus familiaris GN=HBB PE=1 SV=1 - [HBB_CANLF]                             | 92,47     | 1           | 1            | 14          | 193     |
| J9NVC6     | Immunoglobulin heavy constant mu OS=Canis lupus familiaris GN=IGHM PE=4 SV=1 - [J9NVC6_CANLF]                | 31,61     | 1           | 0            | 14          | 281     |
| J9JHX7     | Uncharacterized protein OS=Canis lupus familiaris GN=TF PE=3 SV=1 - [J9JHX7_CANLF]                           | 28,14     | 1           | 0            | 14          | 94      |
| F1PKX3     | Coagulation factor XIII A chain OS=Canis lupus familiaris GN=F13A1 PE=4 SV=2 - [F1PKX3_CANLF]                | 28,1      | 1           | 14           | 14          | 67      |
| F1PNV5     | Kallikrein B1 OS=Canis lupus familiaris GN=KLKB1 PE=2 SV=2 - [F1PNV5_CANLF]                                  | 26,57     | 1           | 13           | 14          | 121     |
| E2RK02     | Glycosylphosphatidylinositol specific phospholipase D1 OS=Canis lupus familiaris GN=GPLD1 PE=4 SV=2 - [E2RK] | 24,47     | 1           | 14           | 14          | 49      |
| O46392     | Collagen alpha-2(I) chain OS=Canis lupus familiaris GN=COL1A2 PE=2 SV=2 - [CO1A2_CANLF]                      | 11,71     | 1           | 0            | 13          | 165     |
| F1PHY1     | Collagen alpha-2(I) chain OS=Canis lupus familiaris GN=COL1A2 PE=4 SV=1 - [F1PHY1_CANLF]                     | 11,71     | 1           | 0            | 13          | 165     |
| F1PAL5     | Angiotensinogen OS=Canis lupus familiaris GN=AGT PE=3 SV=2 - [F1PAL5_CANLF]                                  | 34,8      | 1           | 13           | 13          | 93      |
| A0A1K0GGH0 | Globin A2 OS=Canis lupus familiaris GN=GLNA2 PE=3 SV=1 - [A0A1K0GGH0_CANLF]                                  | 82,31     | 1           | 0            | 12          | 114     |
| J9NYW7     | Immunoglobulin heavy constant mu OS=Canis lupus familiaris GN=IGHM PE=4 SV=1 - [J9NYW7_CANLF]                | 38,46     | 1           | 1            | 12          | 299     |
| J9PAA4     | Carboxypeptidase N subunit 2 OS=Canis lupus familiaris GN=CPN2 PE=4 SV=1 - [J9PAA4_CANLF]                    | 37,11     | 1           | 12           | 12          | 130     |
| E2R3R2     | Proteasome subunit beta type OS=Canis lupus familiaris GN=PSMB5 PE=3 SV=1 - [E2R3R2_CANLF]                   | 60,84     | 1           | 12           | 12          | 159     |
| E2RNG3     | Carboxypeptidase N subunit 1 OS=Canis lupus familiaris GN=CPN1 PE=4 SV=1 - [E2RNG3_CANLF]                    | 41,36     | 1           | 3            | 11          | 55      |
| F1PKB2     | Alpha-mannosidase OS=Canis lupus familiaris GN=MAN2B1 PE=3 SV=2 - [F1PKB2_CANLF]                             | 16,48     | 1           | 11           | 11          | 31      |
| F1PDJ7     | Uncharacterized protein OS=Canis lupus familiaris GN=AZGP1 PE=3 SV=2 - [F1PDJ7_CANLF]                        | 47,62     | 1           | 11           | 11          | 61      |
| E2RMF9     | Serpin family A member 5 OS=Canis lupus familiaris GN=SERPINA5 PE=3 SV=1 - [E2RMF9_CANLF]                    | 38,08     | 1           | 11           | 11          | 125     |
| F1PMS8     | Neural cell adhesion molecule 1 OS=Canis lupus familiaris GN=NCAM1 PE=4 SV=2 - [F1PMS8_CANLF]                | 22,14     | 1           | 0            | 11          | 197     |
| Q512D5     | CD56 120 kDa GPI-linked isoform OS=Canis lupus familiaris GN=CD56 PE=2 SV=1 - [Q512D5_CANLF]                 | 21,66     | 1           | 0            | 11          | 197     |
| Q512D7     | CD56 140 kDa isoform OS=Canis lupus familiaris GN=CD56 PE=2 SV=1 - [Q512D7_CANLF]                            | 18,54     | 1           | 0            | 11          | 197     |
| Q6QNF3     | Platelet-derived growth factor receptor beta OS=Canis lupus familiaris GN=PDGFRB PE=2 SV=1 - [PGFRB_CANL]    | 12,06     | 1           | 0            | 11          | 81      |
| F1PE35     | Platelet-derived growth factor receptor beta OS=Canis lupus familiaris GN=PDGFRB PE=3 SV=2 - [F1PE35_CANL]   | 11,73     | 1           | 0            | 11          | 81      |
| E2RMN2     | Proteasome subunit alpha type OS=Canis lupus familiaris GN=PSMA6 PE=3 SV=1 - [E2RMN2_CANLF]                  | 49,19     | 1           | 11           | 11          | 320     |
| E2RSU8     | Transthyretin OS=Canis lupus familiaris GN=TTR PE=3 SV=1 - [E2RSU8_CANLF]                                    | 73,47     | 1           | 10           | 10          | 133     |
| E2R9B6     | Fetuin B OS=Canis lupus familiaris GN=FETUB PE=4 SV=1 - [E2R9B6_CANLF]                                       | 33,51     | 1           | 10           | 10          | 62      |
| E2RE31     | Immunoglobulin heavy constant mu OS=Canis lupus familiaris GN=IGHM PE=4 SV=2 - [E2RE31_CANLF]                | 27,03     | 1           | 0            | 10          | 60      |
| E2RES2     | Serpin family C member 1 OS=Canis lupus familiaris GN=SERPINC1 PE=3 SV=2 - [E2RES2_CANLF]                    | 26,02     | 1           | 10           | 10          | 18      |

|            |                                                                                                                  |       |   |    |    |      |
|------------|------------------------------------------------------------------------------------------------------------------|-------|---|----|----|------|
| E2RG01     | Complement C7 OS=Canis lupus familiaris GN=C7 PE=4 SV=2 - [E2RG01_CANLF]                                         | 19,93 | 1 | 10 | 10 | 19   |
| Q9XSJ7     | Collagen alpha-1(I) chain OS=Canis lupus familiaris GN=COL1A1 PE=1 SV=1 - [CO1A1_CANLF]                          | 9,73  | 1 | 0  | 10 | 230  |
| F1Q3I5     | Collagen alpha-1(I) chain OS=Canis lupus familiaris GN=COL1A1 PE=4 SV=2 - [F1Q3I5_CANLF]                         | 9,7   | 1 | 0  | 10 | 230  |
| F2Z4N7     | Actin, alpha, cardiac muscle 1 OS=Canis lupus familiaris GN=ACTC1 PE=3 SV=1 - [F2Z4N7_CANLF]                     | 32,1  | 1 | 3  | 10 | 35   |
| E2R5B2     | Enolase 3 OS=Canis lupus familiaris GN=ENO3 PE=3 SV=1 - [E2R5B2_CANLF]                                           | 37,79 | 1 | 8  | 10 | 23   |
| F1PMU2     | Neural cell adhesion molecule 1 OS=Canis lupus familiaris GN=NCAM1 PE=4 SV=2 - [F1PMU2_CANLF]                    | 17,6  | 1 | 0  | 10 | 196  |
| Q5I2D6     | CD56 140 kDa VASE isoform OS=Canis lupus familiaris PE=2 SV=1 - [Q5I2D6_CANLF]                                   | 17,27 | 1 | 0  | 10 | 196  |
| E2QW34     | Proteasome subunit beta type OS=Canis lupus familiaris GN=PSMB2 PE=3 SV=1 - [E2QW34_CANLF]                       | 54,23 | 1 | 10 | 10 | 138  |
| E2RLH6     | Uncharacterized protein OS=Canis lupus familiaris GN=LOC609402 PE=3 SV=2 - [E2RLH6_CANLF]                        | 67,11 | 1 | 0  | 9  | 85   |
| E2QUV3     | Alpha 2-HS glycoprotein OS=Canis lupus familiaris GN=AHSG PE=3 SV=2 - [E2QUV3_CANLF]                             | 36,16 | 1 | 9  | 9  | 216  |
| F1PJ74     | Apolipoprotein E OS=Canis lupus familiaris GN=APOE PE=3 SV=1 - [F1PJ74_CANLF]                                    | 34,98 | 1 | 1  | 9  | 65   |
| Q28243     | Fibrinogen A-alpha-chain (Fragment) OS=Canis lupus familiaris PE=4 SV=1 - [Q28243_CANLF]                         | 20,99 | 1 | 0  | 9  | 75   |
| Q6EI20     | Keratin, type I cytoskeletal 10 OS=Canis lupus familiaris GN=KRT10 PE=2 SV=1 - [K1C10_CANLF]                     | 17,78 | 1 | 0  | 9  | 66   |
| F1PYU9     | Keratin, type I cytoskeletal 10 OS=Canis lupus familiaris GN=KRT10 PE=3 SV=2 - [F1PYU9_CANLF]                    | 17,78 | 1 | 0  | 9  | 66   |
| E2R833     | Leucine rich alpha-2-glycoprotein 1 OS=Canis lupus familiaris GN=LRG1 PE=4 SV=2 - [E2R833_CANLF]                 | 27,95 | 1 | 0  | 9  | 38   |
| J9N5S7     | Leucine rich alpha-2-glycoprotein 1 OS=Canis lupus familiaris GN=LRG1 PE=4 SV=1 - [J9N5S7_CANLF]                 | 27,4  | 1 | 0  | 9  | 38   |
| F1PHS2     | Serpin family A member 6 OS=Canis lupus familiaris GN=SERPINA6 PE=3 SV=2 - [F1PHS2_CANLF]                        | 26,73 | 1 | 9  | 9  | 54   |
| J9JHW4     | Proteasome endopeptidase complex OS=Canis lupus familiaris PE=3 SV=1 - [J9JHW4_CANLF]                            | 36,12 | 1 | 1  | 9  | 47   |
| Q7M321     | Plasmin (Fragments) OS=Canis lupus familiaris PE=4 SV=1 - [Q7M321_CANLF]                                         | 78,33 | 1 | 1  | 8  | 376  |
| E2RAK7     | Apolipoprotein A-II OS=Canis lupus familiaris GN=APOA2 PE=1 SV=2 - [APOA2_CANLF]                                 | 67    | 1 | 8  | 8  | 234  |
| J9P028     | Glutathione peroxidase OS=Canis lupus familiaris GN=GPX3 PE=3 SV=1 - [J9P028_CANLF]                              | 54,9  | 1 | 8  | 8  | 135  |
| P56595     | Apolipoprotein C-I OS=Canis lupus familiaris GN=APOC1 PE=1 SV=1 - [APOC1_CANLF]                                  | 40,91 | 1 | 8  | 8  | 56   |
| P18649     | Apolipoprotein E OS=Canis lupus familiaris GN=APOE PE=1 SV=2 - [APOE_CANLF]                                      | 35,08 | 1 | 1  | 8  | 48   |
| F1PCK2     | Alpha-1-B glycoprotein OS=Canis lupus familiaris GN=A1BG PE=4 SV=2 - [F1PCK2_CANLF]                              | 26,08 | 1 | 8  | 8  | 22   |
| P25473     | Clusterin OS=Canis lupus familiaris GN=CLU PE=2 SV=1 - [CLU_CANLF]                                               | 21,12 | 1 | 0  | 8  | 26   |
| E2QYU2     | Clusterin OS=Canis lupus familiaris GN=CLU PE=3 SV=1 - [E2QYU2_CANLF]                                            | 21,03 | 1 | 0  | 8  | 26   |
| E2RS75     | Uncharacterized protein OS=Canis lupus familiaris GN=CFB PE=3 SV=1 - [E2RS75_CANLF]                              | 14,34 | 1 | 0  | 8  | 13   |
| E2RK21     | Uncharacterized protein OS=Canis lupus familiaris GN=CFH PE=4 SV=2 - [E2RK21_CANLF]                              | 12,36 | 1 | 0  | 8  | 20   |
| Q6EIV9     | Keratin, type II cytoskeletal 1 OS=Canis lupus familiaris GN=KRT1 PE=2 SV=1 - [K2C1_CANLF]                       | 10,99 | 1 | 0  | 8  | 107  |
| F1PTY1     | Keratin, type II cytoskeletal 1 OS=Canis lupus familiaris GN=KRT1 PE=3 SV=1 - [F1PTY1_CANLF]                     | 10,99 | 1 | 0  | 8  | 107  |
| E2RAH4     | Tropomyosin 2 (beta) OS=Canis lupus familiaris GN=TPM2 PE=2 SV=2 - [E2RAH4_CANLF]                                | 23,94 | 1 | 2  | 8  | 15   |
| F1PVC1     | Actin, alpha 1, skeletal muscle OS=Canis lupus familiaris GN=ACTA1 PE=3 SV=2 - [F1PVC1_CANLF]                    | 28,01 | 1 | 1  | 8  | 28   |
| E2RC23     | Procollagen C-endopeptidase enhancer OS=Canis lupus familiaris GN=PCOLCE PE=4 SV=1 - [E2RC23_CANLF]              | 33,19 | 1 | 8  | 8  | 39   |
| E2RLN1     | Serpin family D member 1 OS=Canis lupus familiaris GN=SERPIND1 PE=3 SV=1 - [E2RLN1_CANLF]                        | 23,19 | 1 | 4  | 8  | 19   |
| J9P849     | Proteasome subunit alpha type OS=Canis lupus familiaris GN=PSMA3 PE=3 SV=1 - [J9P849_CANLF]                      | 34,55 | 1 | 0  | 8  | 123  |
| E2RK4R     | Proteasome subunit alpha type OS=Canis lupus familiaris GN=PSMA3 PE=3 SV=1 - [E2RK4R_CANLF]                      | 33,33 | 1 | 0  | 8  | 123  |
| J9P9G4     | Proteasome subunit alpha type OS=Canis lupus familiaris PE=3 SV=1 - [J9P9G4_CANLF]                               | 32,7  | 1 | 1  | 8  | 62   |
| F1PQ99     | Mannan binding lectin serine peptidase 1 OS=Canis lupus familiaris GN=MASP1 PE=3 SV=1 - [F1PQ99_CANLF]           | 15,91 | 1 | 0  | 8  | 62   |
| F1PSX2     | Uncharacterized protein OS=Canis lupus familiaris PE=4 SV=2 - [F1PSX2_CANLF]                                     | 84,91 | 1 | 0  | 7  | 2482 |
| L7NOF2     | Uncharacterized protein OS=Canis lupus familiaris PE=4 SV=1 - [L7NOF2_CANLF]                                     | 71,43 | 1 | 0  | 7  | 2314 |
| J9PAW5     | Uncharacterized protein OS=Canis lupus familiaris PE=4 SV=1 - [J9PAW5_CANLF]                                     | 71,43 | 1 | 0  | 7  | 2374 |
| H9GWR8     | Uncharacterized protein OS=Canis lupus familiaris PE=4 SV=1 - [H9GWR8_CANLF]                                     | 69,77 | 1 | 0  | 7  | 2482 |
| J9NSQ1     | Uncharacterized protein OS=Canis lupus familiaris PE=4 SV=1 - [J9NSQ1_CANLF]                                     | 58,44 | 1 | 0  | 7  | 2314 |
| J9P9J6     | Uncharacterized protein OS=Canis lupus familiaris PE=4 SV=1 - [J9P9J6_CANLF]                                     | 31,07 | 1 | 7  | 7  | 133  |
| A1ILJ0     | Alpha 1 antitrypsin OS=Canis lupus familiaris PE=2 SV=1 - [A1ILJ0_CANLF]                                         | 21,2  | 1 | 1  | 7  | 104  |
| F1PYM4     | Insulin like growth factor binding protein acid labile subunit OS=Canis lupus familiaris GN=IGFALS PE=4 SV=2 - [ | 16,06 | 1 | 7  | 7  | 17   |
| F1PZC6     | Histidine rich glycoprotein OS=Canis lupus familiaris GN=HRG PE=4 SV=2 - [F1PZC6_CANLF]                          | 16,01 | 1 | 7  | 7  | 17   |
| F1PHR2     | Pyruvate kinase OS=Canis lupus familiaris GN=PKM PE=3 SV=2 - [F1PHR2_CANLF]                                      | 16,82 | 1 | 5  | 7  | 10   |
| Q076A3     | Myosin-13 OS=Canis lupus familiaris GN=MYH13 PE=3 SV=1 - [MYH13_CANLF]                                           | 3,97  | 1 | 0  | 7  | 7    |
| F1P916     | Tropomyosin 1 OS=Canis lupus familiaris GN=TPM1 PE=3 SV=2 - [F1P916_CANLF]                                       | 18,71 | 1 | 0  | 7  | 11   |
| F1PQU7     | Myosin-13 OS=Canis lupus familiaris GN=MYH13 PE=3 SV=2 - [F1PQU7_CANLF]                                          | 3,97  | 1 | 0  | 7  | 7    |
| A0A0N9JIB9 | Tropomyosin 1 alpha OS=Canis lupus familiaris GN=Tpm1 PE=2 SV=1 - [A0A0N9JIB9_CANLF]                             | 18,31 | 1 | 0  | 7  | 11   |
| E2RRM2     | Coagulation factor II, thrombin OS=Canis lupus familiaris GN=F2 PE=3 SV=2 - [E2RRM2_CANLF]                       | 15,17 | 1 | 0  | 7  | 15   |
| J9NSF9     | Prothrombin OS=Canis lupus familiaris GN=F2 PE=3 SV=1 - [J9NSF9_CANLF]                                           | 14,65 | 1 | 0  | 7  | 15   |
| O18840     | Actin, cytoplasmic 1 OS=Canis lupus familiaris GN=ACTB PE=2 SV=3 - [ACTB_CANLF]                                  | 29,33 | 1 | 0  | 7  | 12   |
| Z4YH12     | Uncharacterized protein OS=Canis lupus familiaris GN=ACTG1 PE=3 SV=1 - [Z4YH12_CANLF]                            | 29,1  | 1 | 0  | 7  | 12   |
| J9NXE2     | Actin, cytoplasmic 1 Actin, cytoplasmic 1, N-terminally processed OS=Canis lupus familiaris GN=ACTBL2 PE=3 SV=1  | 35,12 | 1 | 0  | 7  | 39   |
| F1PQL8     | Uncharacterized protein OS=Canis lupus familiaris GN=ACTG1 PE=3 SV=2 - [F1PQL8_CANLF]                            | 35,12 | 1 | 0  | 7  | 39   |
| E2QX17     | Proteasome subunit beta type OS=Canis lupus familiaris GN=PSMB3 PE=3 SV=1 - [E2QX17_CANLF]                       | 43,41 | 1 | 7  | 7  | 114  |
| E2R416     | Lumican OS=Canis lupus familiaris GN=LUM PE=4 SV=1 - [E2R416_CANLF]                                              | 27,81 | 1 | 7  | 7  | 57   |
| L7NOK2     | Uncharacterized protein OS=Canis lupus familiaris PE=4 SV=1 - [L7NOK2_CANLF]                                     | 67,77 | 1 | 4  | 6  | 191  |
| P60529     | Hemoglobin subunit alpha OS=Canis lupus familiaris GN=HBA PE=1 SV=1 - [HBA_CANLF]                                | 63,83 | 1 | 0  | 6  | 87   |
| J9JHF7     | Uncharacterized protein OS=Canis lupus familiaris GN=LOC100855540 PE=3 SV=1 - [J9JHF7_CANLF]                     | 63,38 | 1 | 1  | 6  | 56   |
| J9NXL3     | Uncharacterized protein OS=Canis lupus familiaris GN=LOC100855558 PE=3 SV=1 - [J9NXL3_CANLF]                     | 63,38 | 1 | 0  | 6  | 87   |
| E2RQ71     | Apolipoprotein M OS=Canis lupus familiaris GN=APOM PE=4 SV=2 - [E2RQ71_CANLF]                                    | 47,87 | 1 | 6  | 6  | 47   |
| J9P4B4     | Complement C1q A chain OS=Canis lupus familiaris GN=C1QA PE=4 SV=1 - [J9P4B4_CANLF]                              | 37,5  | 1 | 6  | 6  | 43   |
| F1PD34     | Secreted phosphoprotein 2 OS=Canis lupus familiaris GN=SPP2 PE=4 SV=2 - [F1PD34_CANLF]                           | 34,67 | 1 | 0  | 6  | 34   |
| J9P1G2     | Complement C1q B chain OS=Canis lupus familiaris GN=C1QB PE=4 SV=1 - [J9P1G2_CANLF]                              | 34,4  | 1 | 6  | 6  | 64   |
| E2RQP5     | Secreted phosphoprotein 2 OS=Canis lupus familiaris GN=SPP2 PE=4 SV=1 - [E2RQP5_CANLF]                           | 33,82 | 1 | 0  | 6  | 34   |
| E2RPW3     | Paraoxonase 1 OS=Canis lupus familiaris GN=PON1 PE=4 SV=2 - [E2RPW3_CANLF]                                       | 31,18 | 1 | 6  | 6  | 12   |
| Q8WMR1     | Plasminogen (Fragment) OS=Canis lupus familiaris PE=2 SV=1 - [Q8WMR1_CANLF]                                      | 30,64 | 1 | 0  | 6  | 33   |
| F1PCE5     | Serpin family A member 1 OS=Canis lupus familiaris GN=SERPINA1 PE=3 SV=2 - [F1PCE5_CANLF]                        | 17,9  | 1 | 0  | 6  | 103  |
| F1PEN8     | Carboxylic ester hydrolase OS=Canis lupus familiaris GN=BHE PE=3 SV=1 - [F1PEN8_CANLF]                           | 16,28 | 1 | 6  | 6  | 11   |
| F1PE28     | Transketolase OS=Canis lupus familiaris GN=TKT PE=4 SV=2 - [F1PE28_CANLF]                                        | 15,97 | 1 | 6  | 6  | 20   |
| E2RFB7     | Amine oxidase OS=Canis lupus familiaris GN=AOC3 PE=3 SV=2 - [E2RFB7_CANLF]                                       | 11,01 | 1 | 0  | 6  | 18   |
| E2RFC0     | Amine oxidase OS=Canis lupus familiaris GN=AOC3 PE=3 SV=2 - [E2RFC0_CANLF]                                       | 10,95 | 1 | 0  | 6  | 18   |
| F1P912     | Tropomyosin 1 OS=Canis lupus familiaris GN=TPM1 PE=3 SV=1 - [F1P912_CANLF]                                       | 11,96 | 1 | 0  | 6  | 9    |
| J9P713     | Inter-alpha-trypsin inhibitor heavy chain 3 OS=Canis lupus familiaris GN=ITHI3 PE=4 SV=1 - [J9P713_CANLF]        | 13,83 | 1 | 0  | 6  | 12   |
| H9GWG4     | Inter-alpha-trypsin inhibitor heavy chain 3 OS=Canis lupus familiaris GN=ITHI3 PE=4 SV=2 - [H9GWG4_CANLF]        | 11,24 | 1 | 0  | 6  | 12   |
| E7BU9P     | Proteasome subunit beta type OS=Canis lupus familiaris GN=PSMB7 PE=2 SV=1 - [E7BU9P_CANLF]                       | 33,57 | 1 | 0  | 6  | 68   |
| E2RPC6     | Proteasome subunit beta type OS=Canis lupus familiaris GN=PSMB7 PE=3 SV=2 - [E2RPC6_CANLF]                       | 32,75 | 1 | 0  | 6  | 68   |
| F1PGD4     | Neural EGFL like 2 OS=Canis lupus familiaris GN=NELL2 PE=4 SV=2 - [F1PGD4_CANLF]                                 | 9,8   | 1 | 6  | 6  | 16   |
| E2R7G9     | Uncharacterized protein OS=Canis lupus familiaris PE=4 SV=2 - [E2R7G9_CANLF]                                     | 58,09 | 1 | 5  | 5  | 89   |
| F1PF90     | Uncharacterized protein OS=Canis lupus familiaris PE=4 SV=2 - [F1PF90_CANLF]                                     | 54,68 | 1 | 5  | 5  | 42   |
| L7N0E8     | Uncharacterized protein OS=Canis lupus familiaris PE=4 SV=1 - [L7N0E8_CANLF]                                     | 44,72 | 1 | 5  | 5  | 11   |
| A0A1K0FUG1 | Globin A1 OS=Canis lupus familiaris GN=GLNA1 PE=3 SV=1 - [A0A1K0FUG1_CANLF]                                      | 43,54 | 1 | 0  | 5  | 20   |
| J9JH23     | Uncharacterized protein OS=Canis lupus familiaris PE=3 SV=1 - [J9JH23_CANLF]                                     | 42,11 | 1 | 0  | 5  | 20   |
| F1PNY2     | Uncharacterized protein OS=Canis lupus familiaris PE=4 SV=2 - [F1PNY2_CANLF]                                     | 40,76 | 1 | 2  | 5  | 234  |
| P12278     | Apolipoprotein C-II OS=Canis lupus familiaris GN=APOC2 PE=1 SV=1 - [APOC2_CANLF]                                 | 39,6  | 1 | 0  | 5  | 143  |
| J9JH55     | Joining chain of multimeric IgA and IgM OS=Canis lupus familiaris GN=JCHAIN PE=4 SV=1 - [J9JH55_CANLF]           | 35,85 | 1 | 5  | 5  | 20   |
| Q9S195     | Adiponectin (Fragment) OS=Canis lupus familiaris GN=APM1 PE=2 SV=1 - [Q9S195_CANLF]                              | 31,44 | 1 | 0  | 5  | 104  |
| E2RNL8     | Apolipoprotein D OS=Canis lupus familiaris GN=APOD PE=3 SV=2 - [E2RNL8_CANLF]                                    | 28,78 | 1 | 0  | 5  | 28   |
| E2RNM1     | Apolipoprotein D OS=Canis lupus familiaris GN=APOD PE=3 SV=1 - [E2RNM1_CANLF]                                    | 27,83 | 1 | 0  | 5  | 28   |

|            |                                                                                                              |       |   |   |   |     |
|------------|--------------------------------------------------------------------------------------------------------------|-------|---|---|---|-----|
| F6XTZ1     | Carboxypeptidase N subunit 1 OS=Canis lupus familiaris GN=CPN1 PE=4 SV=1 - [F6XTZ1_CANLF]                    | 27,39 | 1 | 0 | 5 | 13  |
| F1Q4D9     | Retinol binding protein 4 OS=Canis lupus familiaris GN=RBP4 PE=3 SV=1 - [F1Q4D9_CANLF]                       | 27,01 | 1 | 5 | 5 | 15  |
| J9NWX4     | Uncharacterized protein OS=Canis lupus familiaris GN=LOC610540 PE=4 SV=1 - [J9NWX4_CANLF]                    | 26,75 | 1 | 1 | 5 | 91  |
| B5U1S6     | Adiponectin (Fragment) OS=Canis lupus PE=2 SV=1 - [B5U1S6_CANLU]                                             | 26,64 | 1 | 0 | 5 | 104 |
| J9NWJ6     | Apolipoprotein C-II OS=Canis lupus familiaris GN=APOC2 PE=4 SV=1 - [J9NWJ6_CANLF]                            | 25,64 | 1 | 0 | 5 | 143 |
| L7NOF1     | Uncharacterized protein OS=Canis lupus familiaris GN=LOC100687054 PE=4 SV=1 - [L7NOF1_CANLF]                 | 25,47 | 1 | 0 | 5 | 277 |
| E2RJC2     | Complement C1q C chain OS=Canis lupus familiaris GN=C1QC PE=4 SV=1 - [E2RJC2_CANLF]                          | 25,31 | 1 | 5 | 5 | 57  |
| J9NYG8     | Complement component 4 binding protein beta OS=Canis lupus familiaris GN=C4BPB PE=4 SV=1 - [J9NYG8_CAI]      | 25,1  | 1 | 0 | 5 | 13  |
| AOA0B4J198 | Adiponectin, C1Q and collagen domain containing OS=Canis lupus familiaris GN=ADIPOQ PE=4 SV=1 - [AOA0B4J198] | 25    | 1 | 0 | 5 | 104 |
| Q76C76     | Adiponectin OS=Canis lupus familiaris GN=apM1 PE=2 SV=1 - [Q76C76_CANLF]                                     | 25    | 1 | 0 | 5 | 104 |
| F1PVL0     | Complement component 4 binding protein beta OS=Canis lupus familiaris GN=C4BPB PE=4 SV=2 - [F1PVL0_CAI]      | 25    | 1 | 0 | 5 | 13  |
| F6Y713     | Alpha-1-acid glycoprotein OS=Canis lupus familiaris GN=LOC100685620 PE=3 SV=1 - [F6Y713_CANLF]               | 23,9  | 1 | 5 | 5 | 18  |
| F1PYX9     | Serpin family G member 1 OS=Canis lupus familiaris GN=SERPING1 PE=3 SV=2 - [F1PYX9_CANLF]                    | 19,3  | 1 | 5 | 5 | 19  |
| J9NUI6     | Alpha-1-microglobulin/bikunin precursor OS=Canis lupus familiaris GN=AMBP PE=4 SV=1 - [J9NUI6_CANLF]         | 17,48 | 1 | 0 | 5 | 9   |
| E2R796     | Alpha-1-microglobulin/bikunin precursor OS=Canis lupus familiaris GN=AMBP PE=4 SV=2 - [E2R796_CANLF]         | 17,23 | 1 | 0 | 5 | 9   |
| E2R2F7     | Sex hormone binding globulin OS=Canis lupus familiaris GN=SHBG PE=4 SV=1 - [E2R2F7_CANLF]                    | 17,04 | 1 | 5 | 5 | 19  |
| F1Q041     | Coagulation factor XIII B chain OS=Canis lupus familiaris GN=F13B PE=4 SV=2 - [F1Q041_CANLF]                 | 13,41 | 1 | 5 | 5 | 10  |
| E2RG76     | Complement C6 OS=Canis lupus familiaris GN=C6 PE=4 SV=2 - [E2RG76_CANLF]                                     | 9,08  | 1 | 5 | 5 | 8   |
| E2RT38     | Maltase-glucoamylase OS=Canis lupus familiaris GN=MGAM PE=3 SV=2 - [E2RT38_CANLF]                            | 4,64  | 1 | 0 | 5 | 6   |
| F1PAQ3     | Maltase-glucoamylase OS=Canis lupus familiaris GN=MGAM PE=3 SV=2 - [F1PAQ3_CANLF]                            | 4,59  | 1 | 0 | 5 | 6   |
| F1PA63     | Lecithin-cholesterol acyltransferase OS=Canis lupus familiaris GN=LCAT PE=4 SV=1 - [F1PA63_CANLF]            | 19,41 | 1 | 5 | 5 | 43  |
| F1PLT8     | Sulphydryl oxidase OS=Canis lupus familiaris GN=QSOX1 PE=4 SV=2 - [F1PLT8_CANLF]                             | 9,54  | 1 | 5 | 5 | 10  |
| T2KEN6     | Pentaxin OS=Canis lupus familiaris GN=CRP PE=2 SV=1 - [T2KEN6_CANLF]                                         | 39,91 | 1 | 0 | 5 | 21  |
| E2R5J0     | Pentaxin OS=Canis lupus familiaris GN=CRP PE=3 SV=2 - [E2R5J0_CANLF]                                         | 35,89 | 1 | 0 | 5 | 21  |
| F1PH86     | Serpin family A member 3 OS=Canis lupus familiaris GN=SERPINA3 PE=3 SV=2 - [F1PH86_CANLF]                    | 16,15 | 1 | 0 | 5 | 15  |
| F1PH87     | Serpin family A member 3 OS=Canis lupus familiaris GN=SERPINA3 PE=3 SV=2 - [F1PH87_CANLF]                    | 15,11 | 1 | 0 | 5 | 15  |
| P05123     | Creatine kinase M-type OS=Canis lupus familiaris GN=CKM PE=1 SV=3 - [KCRM_CANLF]                             | 15,75 | 1 | 5 | 5 | 16  |
| Q28259     | Glyceraldehyde-3-phosphate dehydrogenase OS=Canis lupus familiaris GN=GAPDH PE=2 SV=3 - [G3P_CANLF]          | 26,73 | 1 | 0 | 5 | 12  |
| E2RQ24     | Myosin light chain 1 OS=Canis lupus familiaris GN=MYL1 PE=4 SV=2 - [E2RQ24_CANLF]                            | 26,63 | 1 | 0 | 5 | 9   |
| F1P7C9     | Glyceraldehyde-3-phosphate dehydrogenase OS=Canis lupus familiaris GN=LOC106559694 PE=3 SV=2 - [F1P7C9]      | 26,73 | 1 | 0 | 5 | 12  |
| F1PBT3     | Fructose-bisphosphate aldolase OS=Canis lupus familiaris PE=3 SV=2 - [F1PBT3_CANLF]                          | 8,27  | 1 | 0 | 5 | 12  |
| F1PTZ9     | Glyceraldehyde-3-phosphate dehydrogenase OS=Canis lupus familiaris GN=GAPDH PE=3 SV=2 - [F1PTZ9_CANL]        | 26,97 | 1 | 0 | 5 | 12  |
| F1PV96     | Myosin light chain 1 OS=Canis lupus familiaris GN=MYL1 PE=4 SV=2 - [F1PV96_CANLF]                            | 25,98 | 1 | 0 | 5 | 9   |
| J9P7A6     | Uncharacterized protein OS=Canis lupus familiaris PE=4 SV=1 - [J9P7A6_CANLF]                                 | 22,57 | 1 | 0 | 5 | 12  |
| J9P9X0     | Interleukin 1 receptor accessory protein OS=Canis lupus familiaris GN=IL1RAP PE=4 SV=1 - [J9P9X0_CANLF]      | 12,24 | 1 | 0 | 5 | 13  |
| F1PIL9     | Interleukin 1 receptor accessory protein OS=Canis lupus familiaris GN=IL1RAP PE=4 SV=2 - [F1PIL9_CANLF]      | 11,19 | 1 | 0 | 5 | 13  |
| J9NUS9     | Interleukin 1 receptor accessory protein OS=Canis lupus familiaris GN=IL1RAP PE=4 SV=1 - [J9NUS9_CANLF]      | 11,19 | 1 | 0 | 5 | 13  |
| F1PEM7     | Insulin like growth factor binding protein 2 OS=Canis lupus familiaris GN=IGFBP2 PE=4 SV=1 - [F1PEM7_CANLF]  | 30,77 | 1 | 5 | 5 | 16  |
| E2RN74     | Carboxypeptidase B2 OS=Canis lupus familiaris GN=CPB2 PE=3 SV=1 - [E2RN74_CANLF]                             | 20,57 | 1 | 5 | 5 | 36  |
| F1PF02     | Proteasome subunit beta type OS=Canis lupus familiaris GN=PSMB1 PE=3 SV=2 - [F1PF02_CANLF]                   | 41,27 | 1 | 5 | 5 | 97  |
| E2R0B6     | Proteasome subunit beta type OS=Canis lupus familiaris GN=PSMB6 PE=3 SV=1 - [E2R0B6_CANLF]                   | 36,4  | 1 | 5 | 5 | 95  |
| E2RF52     | Proteasome subunit alpha type OS=Canis lupus familiaris GN=PSMA8 PE=3 SV=2 - [E2RF52_CANLF]                  | 24,8  | 1 | 2 | 5 | 81  |
| J9P915     | Proteasome endopeptidase complex OS=Canis lupus familiaris PE=3 SV=1 - [J9P915_CANLF]                        | 21,29 | 1 | 0 | 5 | 22  |
| L7NOI0     | Uncharacterized protein OS=Canis lupus familiaris PE=4 SV=1 - [L7NOI0_CANLF]                                 | 63,77 | 1 | 2 | 4 | 143 |
| F1PH61     | Uncharacterized protein OS=Canis lupus familiaris PE=4 SV=2 - [F1PH61_CANLF]                                 | 58,82 | 1 | 4 | 4 | 29  |
| J9P5C8     | Uncharacterized protein OS=Canis lupus familiaris PE=4 SV=1 - [J9P5C8_CANLF]                                 | 53,85 | 1 | 2 | 4 | 241 |
| J9NY8      | Uncharacterized protein OS=Canis lupus familiaris PE=4 SV=1 - [J9NY8_CANLF]                                  | 53,61 | 1 | 2 | 4 | 347 |
| F1PKI5     | Immunoglobulin heavy constant mu OS=Canis lupus familiaris GN=IGHM PE=4 SV=2 - [F1PKI5_CANLF]                | 52,07 | 1 | 1 | 4 | 18  |
| J9P9H8     | Uncharacterized protein OS=Canis lupus familiaris GN=LOC100855558 PE=3 SV=1 - [J9P9H8_CANLF]                 | 50,36 | 1 | 0 | 4 | 8   |
| J9PAX5     | Uncharacterized protein OS=Canis lupus familiaris PE=4 SV=1 - [J9PAX5_CANLF]                                 | 47,37 | 1 | 2 | 4 | 215 |
| J9P3B7     | Immunoglobulin heavy constant mu OS=Canis lupus familiaris GN=IGHM PE=4 SV=1 - [J9P3B7_CANLF]                | 44,68 | 1 | 0 | 4 | 43  |
| F1PL50     | Uncharacterized protein OS=Canis lupus familiaris PE=4 SV=2 - [F1PL50_CANLF]                                 | 42,41 | 1 | 4 | 4 | 55  |
| J9P0D4     | Uncharacterized protein OS=Canis lupus familiaris PE=4 SV=1 - [J9P0D4_CANLF]                                 | 30,5  | 1 | 3 | 4 | 47  |
| F1PYR5     | Uncharacterized protein OS=Canis lupus familiaris PE=4 SV=2 - [F1PYR5_CANLF]                                 | 30,17 | 1 | 4 | 4 | 160 |
| F1Q184     | Uncharacterized protein OS=Canis lupus familiaris PE=4 SV=2 - [F1Q184_CANLF]                                 | 24,26 | 1 | 4 | 4 | 112 |
| J9P7F7     | Uncharacterized protein OS=Canis lupus familiaris GN=FCN2 PE=4 SV=1 - [J9P7F7_CANLF]                         | 22,98 | 1 | 4 | 4 | 26  |
| F1Q1W7     | Uncharacterized protein OS=Canis lupus familiaris GN=LOC610540 PE=4 SV=2 - [F1Q1W7_CANLF]                    | 19,78 | 1 | 0 | 4 | 58  |
| F1PCE2     | Exostosin like glycosyltransferase 2 OS=Canis lupus familiaris GN=EXTL2 PE=4 SV=2 - [F1PCE2_CANLF]           | 17,72 | 1 | 0 | 4 | 6   |
| J9P983     | Exostosin like glycosyltransferase 2 OS=Canis lupus familiaris GN=EXTL2 PE=4 SV=1 - [J9P983_CANLF]           | 16,97 | 1 | 0 | 4 | 6   |
| B5LX43     | Factor XI OS=Canis lupus familiaris PE=2 SV=1 - [B5LX43_CANLF]                                               | 9,62  | 1 | 0 | 4 | 8   |
| F1PPK8     | Coagulation factor XI OS=Canis lupus familiaris GN=F11 PE=3 SV=2 - [F1PPK8_CANLF]                            | 9,43  | 1 | 0 | 4 | 8   |
| F6Y6T8     | Uncharacterized protein OS=Canis lupus familiaris GN=PIGR PE=4 SV=1 - [F6Y6T8_CANLF]                         | 8,27  | 1 | 1 | 4 | 4   |
| F6XKCO     | Complement C8 gamma chain OS=Canis lupus familiaris GN=C8G PE=3 SV=1 - [F6XKCO_CANLF]                        | 39,11 | 1 | 2 | 4 | 16  |
| F224Q7     | Serpin family F member 1 OS=Canis lupus familiaris GN=SERPINF1 PE=3 SV=1 - [F224Q7_CANLF]                    | 16,51 | 1 | 4 | 4 | 7   |
| E2R674     | Tropomyosin 2 (beta) OS=Canis lupus familiaris GN=TPM2 PE=4 SV=2 - [E2R674_CANLF]                            | 13,59 | 1 | 0 | 4 | 5   |
| F1PYE8     | Glyceraldehyde-3-phosphate dehydrogenase OS=Canis lupus familiaris PE=3 SV=2 - [F1PYE8_CANLF]                | 22,66 | 1 | 0 | 4 | 10  |
| F1PNS6     | Peptidase D OS=Canis lupus familiaris GN=PEPD PE=3 SV=2 - [F1PNS6_CANLF]                                     | 18,65 | 1 | 4 | 4 | 6   |
| J9P8Q8     | Serpin family D member 1 OS=Canis lupus familiaris GN=SERPIND1 PE=3 SV=1 - [J9P8Q8_CANLF]                    | 13,02 | 1 | 0 | 4 | 5   |
| J9NWX1     | Uncharacterized protein OS=Canis lupus familiaris PE=3 SV=1 - [J9NWX1_CANLF]                                 | 23,35 | 1 | 0 | 4 | 13  |
| H9GW85     | Uncharacterized protein OS=Canis lupus familiaris PE=4 SV=2 - [H9GW85_CANLF]                                 | 34,78 | 1 | 0 | 4 | 8   |
| J9P8Z6     | Complement C9 OS=Canis lupus familiaris GN=C9 PE=4 SV=1 - [J9P8Z6_CANLF]                                     | 25,45 | 1 | 0 | 4 | 11  |
| F1PSK2     | Deleted in malignant brain tumors 1 OS=Canis lupus familiaris GN=DMBT1 PE=4 SV=2 - [F1PSK2_CANLF]            | 14,39 | 1 | 0 | 4 | 8   |
| L7N0D6     | Deleted in malignant brain tumors 1 OS=Canis lupus familiaris GN=DMBT1 PE=4 SV=1 - [L7N0D6_CANLF]            | 9,03  | 1 | 0 | 4 | 8   |
| F1PRV8     | Deleted in malignant brain tumors 1 OS=Canis lupus familiaris GN=DMBT1 PE=4 SV=2 - [F1PRV8_CANLF]            | 8,51  | 1 | 0 | 4 | 8   |
| F1PSS2     | Thrombospondin 4 OS=Canis lupus familiaris GN=THBS4 PE=4 SV=2 - [F1PSS2_CANLF]                               | 8,25  | 1 | 3 | 4 | 13  |
| Q28278     | Vitamin K-dependent protein C OS=Canis lupus familiaris GN=PROC PE=2 SV=2 - [PROC_CANLF]                     | 15,35 | 1 | 0 | 4 | 27  |
| J9NVK0     | Vitamin K-dependent protein C OS=Canis lupus familiaris GN=PROC PE=3 SV=1 - [J9NVK0_CANLF]                   | 13,67 | 1 | 0 | 4 | 27  |
| J9P482     | Immunoglobulin heavy constant mu OS=Canis lupus familiaris GN=IGHM PE=4 SV=1 - [J9P482_CANLF]                | 44,83 | 1 | 0 | 3 | 17  |
| J9P6Z9     | Uncharacterized protein OS=Canis lupus familiaris PE=4 SV=1 - [J9P6Z9_CANLF]                                 | 44,83 | 1 | 2 | 3 | 14  |
| J9P182     | Immunoglobulin heavy constant mu OS=Canis lupus familiaris GN=IGHM PE=4 SV=1 - [J9P182_CANLF]                | 44,07 | 1 | 2 | 3 | 59  |
| H9GWRO     | Uncharacterized protein OS=Canis lupus familiaris PE=4 SV=2 - [H9GWRO_CANLF]                                 | 36    | 1 | 0 | 3 | 159 |
| J9PAD4     | Uncharacterized protein OS=Canis lupus familiaris PE=4 SV=1 - [J9PAD4_CANLF]                                 | 36    | 1 | 0 | 3 | 82  |
| F1PDJ0     | Apolipoprotein C-III OS=Canis lupus familiaris GN=APOC3 PE=4 SV=1 - [F1PDJ0_CANLF]                           | 35    | 1 | 1 | 3 | 85  |
| J9P8P3     | Uncharacterized protein OS=Canis lupus familiaris PE=4 SV=1 - [J9P8P3_CANLF]                                 | 34,88 | 1 | 0 | 3 | 82  |
| F6V8B5     | Uncharacterized protein OS=Canis lupus familiaris PE=4 SV=1 - [F6V8B5_CANLF]                                 | 33,82 | 1 | 2 | 3 | 16  |
| J9NYCO     | Microfibril associated protein 4 OS=Canis lupus familiaris GN=MFAP4 PE=4 SV=1 - [J9NYCO_CANLF]               | 33,46 | 1 | 3 | 3 | 21  |
| J9P1F6     | Uncharacterized protein OS=Canis lupus familiaris PE=4 SV=1 - [J9P1F6_CANLF]                                 | 31,91 | 1 | 1 | 3 | 94  |
| J9P1M7     | Uncharacterized protein OS=Canis lupus familiaris PE=4 SV=1 - [J9P1M7_CANLF]                                 | 31,91 | 1 | 0 | 3 | 113 |
| J9NWX7     | Immunoglobulin heavy constant mu OS=Canis lupus familiaris GN=IGHM PE=4 SV=1 - [J9NWX7_CANLF]                | 31,43 | 1 | 1 | 3 | 54  |
| L7NOE7     | Uncharacterized protein OS=Canis lupus familiaris GN=LOC612180 PE=4 SV=1 - [L7NOE7_CANLF]                    | 31,03 | 1 | 1 | 3 | 107 |
| J9P455     | Uncharacterized protein OS=Canis lupus familiaris PE=4 SV=1 - [J9P455_CANLF]                                 | 30,95 | 1 | 1 | 3 | 18  |
| J9P3L5     | Uncharacterized protein OS=Canis lupus familiaris PE=4 SV=1 - [J9P3L5_CANLF]                                 | 30,61 | 1 | 1 | 3 | 58  |
| J9P843     | Apolipoprotein A-I OS=Canis lupus familiaris GN=APOA1 PE=4 SV=1 - [J9P843_CANLF]                             | 27,54 | 1 | 0 | 3 | 14  |

|            |                                                                                                                           |       |   |   |   |     |
|------------|---------------------------------------------------------------------------------------------------------------------------|-------|---|---|---|-----|
| P19708     | Serum amyloid A protein OS=Canis lupus familiaris GN=SAA1 PE=1 SV=2 - [SAA_CANLF]                                         | 19,38 | 1 | 1 | 3 | 8   |
| D5G335     | Apolipoprotein E4 (Fragment) OS=Canis lupus familiaris PE=3 SV=1 - [D5G335_CANLF]                                         | 17,65 | 1 | 0 | 3 | 13  |
| D5G341     | Apolipoprotein E4 (Fragment) OS=Canis lupus familiaris PE=3 SV=1 - [D5G341_CANLF]                                         | 17,65 | 1 | 0 | 3 | 13  |
| D5G334     | Apolipoprotein E4 (Fragment) OS=Canis lupus familiaris PE=3 SV=1 - [D5G334_CANLF]                                         | 17,65 | 1 | 0 | 3 | 13  |
| E2RNL3     | Peroxisidoxin 4 OS=Canis lupus familiaris GN=PRDX4 PE=4 SV=1 - [E2RNL3_CANLF]                                             | 15,44 | 1 | 2 | 3 | 4   |
| Q8MJZ1     | Polymeric immunoglobulin receptor (Fragment) OS=Canis lupus familiaris PE=2 SV=1 - [Q8MJZ1_CANLF]                         | 14,44 | 1 | 0 | 3 | 3   |
| E2R109     | Complement C8 alpha chain OS=Canis lupus familiaris GN=C8A PE=4 SV=1 - [E2R109_CANLF]                                     | 9,51  | 1 | 3 | 3 | 15  |
| E2QYG1     | Periostin OS=Canis lupus familiaris GN=POSTN PE=2 SV=2 - [E2QYG1_CANLF]                                                   | 7,55  | 1 | 0 | 3 | 5   |
| E2QUG4     | Periostin OS=Canis lupus familiaris GN=POSTN PE=4 SV=2 - [E2QUG4_CANLF]                                                   | 7,06  | 1 | 0 | 3 | 5   |
| F1PAX2     | Ceruloplasmin OS=Canis lupus familiaris GN=CP PE=3 SV=2 - [F1PAX2_CANLF]                                                  | 3,94  | 1 | 3 | 3 | 6   |
| F6PNA4     | Uncharacterized protein OS=Canis lupus familiaris GN=LOC609402 PE=3 SV=1 - [F6PNA4_CANLF]                                 | 25,85 | 1 | 0 | 3 | 10  |
| E2RN10     | Beta-2-microglobulin OS=Canis lupus familiaris GN=B2M PE=1 SV=2 - [E2RN10_CANLF]                                          | 21,6  | 1 | 3 | 3 | 16  |
| F1PR54     | Uncharacterized protein OS=Canis lupus familiaris GN=LTF PE=3 SV=1 - [F1PR54_CANLF]                                       | 3,53  | 1 | 0 | 3 | 14  |
| E2RRB2     | Calcium-transporting ATPase OS=Canis lupus familiaris GN=ATP2A1 PE=3 SV=1 - [E2RRB2_CANLF]                                | 4,6   | 1 | 0 | 3 | 8   |
| J9P9P2     | Calcium-transporting ATPase OS=Canis lupus familiaris GN=ATP2A1 PE=3 SV=1 - [J9P9P2_CANLF]                                | 4,63  | 1 | 0 | 3 | 8   |
| F1PGU1     | Myosin light chain, phosphorylatable, fast skeletal muscle OS=Canis lupus familiaris GN=MYLPF PE=4 SV=2 - [F1PGU1_CANLF]  | 22,35 | 1 | 3 | 3 | 3   |
| J9NST4     | Uncharacterized protein OS=Canis lupus familiaris PE=4 SV=1 - [J9NST4_CANLF]                                              | 19,63 | 1 | 3 | 3 | 43  |
| E2RFV9     | Complement C9 OS=Canis lupus familiaris GN=C9 PE=4 SV=2 - [E2RFV9_CANLF]                                                  | 8,68  | 1 | 3 | 3 | 22  |
| Q8WN71     | Myosin light chain 2 OS=Canis lupus familiaris GN=MYL2 PE=2 SV=1 - [Q8WN71_CANLF]                                         | 19,28 | 1 | 3 | 3 | 6   |
| F6XIP5     | Myosin light chain 6B OS=Canis lupus familiaris GN=MYL6B PE=4 SV=1 - [F6XIP5_CANLF]                                       | 14,35 | 1 | 2 | 3 | 5   |
| J9PB14     | Biotinidase OS=Canis lupus familiaris GN=BDT PE=4 SV=1 - [J9PB14_CANLF]                                                   | 6,39  | 1 | 0 | 3 | 7   |
| E2QY64     | Biotinidase OS=Canis lupus familiaris GN=BDT PE=4 SV=2 - [E2QY64_CANLF]                                                   | 6,24  | 1 | 0 | 3 | 7   |
| Q6TEQ7     | Annexin A2 OS=Canis lupus familiaris GN=ANXA2 PE=1 SV=1 - [ANXA2_CANLF]                                                   | 13,57 | 1 | 3 | 3 | 7   |
| E2R612     | EGF containing fibulin like extracellular matrix protein 1 OS=Canis lupus familiaris GN=EFEMP1 PE=4 SV=1 - [E2R612_CANLF] | 9,36  | 1 | 3 | 3 | 5   |
| Q28284     | CD44 antigen (Fragment) OS=Canis lupus familiaris GN=CD44 PE=2 SV=1 - [CD44_CANLF]                                        | 8,83  | 1 | 0 | 3 | 48  |
| J9P423     | CD44 antigen OS=Canis lupus familiaris GN=CD44 PE=4 SV=1 - [J9P423_CANLF]                                                 | 8,54  | 1 | 0 | 3 | 48  |
| F1PTZ7     | CD44 antigen OS=Canis lupus familiaris GN=CD44 PE=4 SV=2 - [F1PTZ7_CANLF]                                                 | 4,4   | 1 | 0 | 3 | 48  |
| F1PCD8     | Laminin subunit beta 1 OS=Canis lupus familiaris GN=LAMB1 PE=4 SV=2 - [F1PCD8_CANLF]                                      | 2,55  | 1 | 3 | 3 | 6   |
| Q28262     | Platelet-activating factor acetylhydrolase OS=Canis lupus familiaris GN=PLA2G7 PE=2 SV=1 - [PAFA_CANLF]                   | 10,36 | 1 | 0 | 3 | 5   |
| F1P9E5     | Platelet-activating factor acetylhydrolase OS=Canis lupus familiaris GN=PLA2G7 PE=4 SV=1 - [F1P9E5_CANLF]                 | 10,36 | 1 | 0 | 3 | 5   |
| E2RKQ6     | Galectin 3 binding protein OS=Canis lupus familiaris GN=LGALS3BP PE=4 SV=1 - [E2RKQ6_CANLF]                               | 6,8   | 1 | 3 | 3 | 7   |
| P02677     | Fibrinogen beta chain (Fragment) OS=Canis lupus familiaris GN=FGB PE=1 SV=2 - [FIBB_CANLF]                                | 61,29 | 1 | 1 | 2 | 22  |
| P12800     | Fibrinogen gamma chain (Fragment) OS=Canis lupus familiaris GN=FGG PE=1 SV=1 - [FIBG_CANLF]                               | 58,33 | 1 | 1 | 2 | 19  |
| J9NVZ4     | Uncharacterized protein OS=Canis lupus familiaris PE=4 SV=1 - [J9NVZ4_CANLF]                                              | 38,14 | 1 | 0 | 2 | 45  |
| L7N098     | Uncharacterized protein OS=Canis lupus familiaris PE=4 SV=1 - [L7N098_CANLF]                                              | 37,69 | 1 | 0 | 2 | 71  |
| J9P4E8     | Uncharacterized protein OS=Canis lupus familiaris PE=4 SV=1 - [J9P4E8_CANLF]                                              | 32,74 | 1 | 0 | 2 | 45  |
| F1PSJ5     | Uncharacterized protein OS=Canis lupus familiaris PE=4 SV=2 - [F1PSJ5_CANLF]                                              | 31,25 | 1 | 0 | 2 | 253 |
| J9P050     | Uncharacterized protein OS=Canis lupus familiaris PE=4 SV=1 - [J9P050_CANLF]                                              | 30,46 | 1 | 1 | 2 | 39  |
| F1PKN5     | Uncharacterized protein OS=Canis lupus familiaris PE=4 SV=2 - [F1PKN5_CANLF]                                              | 29,45 | 1 | 2 | 2 | 33  |
| L7N0E6     | Uncharacterized protein OS=Canis lupus familiaris PE=4 SV=1 - [L7N0E6_CANLF]                                              | 28,67 | 1 | 1 | 2 | 15  |
| P12279     | Apolipoprotein C-III OS=Canis lupus familiaris GN=APOC3 PE=2 SV=1 - [APOC3_CANLF]                                         | 28    | 1 | 0 | 2 | 68  |
| J9P590     | Uncharacterized protein OS=Canis lupus familiaris PE=4 SV=1 - [J9P590_CANLF]                                              | 27,94 | 1 | 2 | 2 | 24  |
| E2QYB2     | Uncharacterized protein OS=Canis lupus familiaris PE=4 SV=2 - [E2QYB2_CANLF]                                              | 27,93 | 1 | 0 | 2 | 16  |
| L7NOK1     | Uncharacterized protein OS=Canis lupus familiaris PE=4 SV=1 - [L7NOK1_CANLF]                                              | 26,44 | 1 | 1 | 2 | 40  |
| J9NS91     | Uncharacterized protein OS=Canis lupus familiaris PE=4 SV=1 - [J9NS91_CANLF]                                              | 25,83 | 1 | 0 | 2 | 16  |
| J9P6L3     | Uncharacterized protein OS=Canis lupus familiaris PE=4 SV=1 - [J9P6L3_CANLF]                                              | 25,41 | 1 | 0 | 2 | 13  |
| J9JHN3     | Uncharacterized protein OS=Canis lupus familiaris PE=4 SV=1 - [J9JHN3_CANLF]                                              | 24,81 | 1 | 1 | 2 | 29  |
| J9POX4     | Uncharacterized protein OS=Canis lupus familiaris PE=4 SV=1 - [J9POX4_CANLF]                                              | 24,6  | 1 | 0 | 2 | 16  |
| J9P3U4     | Uncharacterized protein OS=Canis lupus familiaris PE=4 SV=1 - [J9P3U4_CANLF]                                              | 24,6  | 1 | 0 | 2 | 16  |
| J9P7N3     | Uncharacterized protein OS=Canis lupus familiaris PE=4 SV=1 - [J9P7N3_CANLF]                                              | 24,6  | 1 | 0 | 2 | 13  |
| J9PBB2     | Uncharacterized protein OS=Canis lupus familiaris PE=4 SV=1 - [J9PBB2_CANLF]                                              | 24,6  | 1 | 0 | 2 | 16  |
| F1Q185     | Uncharacterized protein OS=Canis lupus familiaris PE=4 SV=2 - [F1Q185_CANLF]                                              | 22,67 | 1 | 2 | 2 | 4   |
| F1PQUO     | Uncharacterized protein OS=Canis lupus familiaris PE=4 SV=2 - [F1PQUO_CANLF]                                              | 21,43 | 1 | 1 | 2 | 62  |
| J9POV6     | Uncharacterized protein OS=Canis lupus familiaris PE=4 SV=1 - [J9POV6_CANLF]                                              | 20,57 | 1 | 1 | 2 | 21  |
| J9P9B9     | Uncharacterized protein OS=Canis lupus familiaris PE=4 SV=1 - [J9P9B9_CANLF]                                              | 19,05 | 1 | 1 | 2 | 31  |
| J9NZT2     | Uncharacterized protein OS=Canis lupus familiaris PE=4 SV=1 - [J9NZT2_CANLF]                                              | 17,6  | 1 | 1 | 2 | 13  |
| L7N0E5     | Uncharacterized protein OS=Canis lupus familiaris PE=4 SV=1 - [L7N0E5_CANLF]                                              | 17,24 | 1 | 1 | 2 | 45  |
| J9NY02     | Uncharacterized protein OS=Canis lupus familiaris PE=4 SV=1 - [J9NY02_CANLF]                                              | 15,71 | 1 | 0 | 2 | 67  |
| A0A096P6K5 | Serum amyloid A protein OS=Canis lupus familiaris GN=LOC476879 PE=3 SV=1 - [A0A096P6K5_CANLF]                             | 14,73 | 1 | 0 | 2 | 6   |
| J9NV9E     | Serum amyloid A protein OS=Canis lupus familiaris GN=LOC102155886 PE=3 SV=1 - [J9NV9E_CANLF]                              | 14,62 | 1 | 0 | 2 | 6   |
| E2RBD4     | Serum amyloid A protein OS=Canis lupus familiaris PE=3 SV=1 - [E2RBD4_CANLF]                                              | 13,01 | 1 | 0 | 2 | 6   |
| E2R9D2     | Uncharacterized protein OS=Canis lupus familiaris PE=4 SV=2 - [E2R9D2_CANLF]                                              | 8,52  | 1 | 2 | 2 | 9   |
| J9PAK7     | Guanine nucleotide-binding protein subunit gamma OS=Canis lupus familiaris GN=GNG2 PE=3 SV=1 - [J9PAK7_CANLF]             | 6,73  | 1 | 0 | 2 | 5   |
| E2R886     | Uncharacterized protein OS=Canis lupus familiaris PE=4 SV=2 - [E2R886_CANLF]                                              | 6,73  | 1 | 0 | 2 | 4   |
| J9PB28     | Fibrinogen like 2 OS=Canis lupus familiaris GN=FLG2 PE=4 SV=1 - [J9PB28_CANLF]                                            | 5,9   | 1 | 2 | 2 | 33  |
| E2RH18     | Complement factor properdin OS=Canis lupus familiaris GN=CFP PE=4 SV=1 - [E2RH18_CANLF]                                   | 5,6   | 1 | 2 | 2 | 4   |
| E2R141     | Complement C8 beta chain OS=Canis lupus familiaris GN=C8B PE=4 SV=1 - [E2R141_CANLF]                                      | 5,25  | 1 | 2 | 2 | 3   |
| O97624     | Keratin 17 (Fragment) OS=Canis lupus familiaris PE=3 SV=1 - [O97624_CANLF]                                                | 5     | 1 | 0 | 2 | 2   |
| Q28275     | Fibronectin (Fragment) OS=Canis lupus familiaris GN=FN1 PE=2 SV=2 - [FINC_CANLF]                                          | 4,98  | 1 | 0 | 2 | 3   |
| F1PRB0     | Uncharacterized protein OS=Canis lupus familiaris GN=LOC486530 PE=3 SV=2 - [F1PRB0_CANLF]                                 | 4,56  | 1 | 0 | 2 | 4   |
| F1PVL5     | Keratin 79 OS=Canis lupus familiaris GN=KRT79 PE=3 SV=2 - [F1PVL5_CANLF]                                                  | 4,3   | 1 | 0 | 2 | 66  |
| E2R917     | Keratin 75 OS=Canis lupus familiaris GN=KRT75 PE=3 SV=2 - [E2R917_CANLF]                                                  | 4,17  | 1 | 0 | 2 | 66  |
| F1PTS8     | Uncharacterized protein OS=Canis lupus familiaris GN=LOC486523 PE=3 SV=1 - [F1PTS8_CANLF]                                 | 4,03  | 1 | 0 | 2 | 13  |
| L7N095     | Keratin 5 OS=Canis lupus familiaris GN=KRT5 PE=3 SV=1 - [L7N095_CANLF]                                                    | 4,03  | 1 | 0 | 2 | 13  |
| E2R8Z5     | Keratin 5 OS=Canis lupus familiaris GN=KRT5 PE=3 SV=2 - [E2R8Z5_CANLF]                                                    | 3,86  | 1 | 0 | 2 | 67  |
| L7N094     | Keratin 3 OS=Canis lupus familiaris GN=KRT3 PE=3 SV=1 - [L7N094_CANLF]                                                    | 3,65  | 1 | 0 | 2 | 66  |
| Q6EI21     | Keratin, type II cytoskeletal 2 epidermal OS=Canis lupus familiaris GN=KRT2 PE=2 SV=1 - [K22E_CANLF]                      | 3,63  | 1 | 0 | 2 | 17  |
| F1PTX4     | Keratin, type II cytoskeletal 2 epidermal OS=Canis lupus familiaris GN=KRT2 PE=3 SV=2 - [F1PTX4_CANLF]                    | 3,62  | 1 | 0 | 2 | 17  |
| F1QON9     | Keratin 19 OS=Canis lupus familiaris GN=KRT19 PE=3 SV=1 - [F1QON9_CANLF]                                                  | 3,51  | 1 | 0 | 2 | 2   |
| F1PSS8     | Protein S (alpha) OS=Canis lupus familiaris GN=PROS1 PE=4 SV=2 - [F1PSS8_CANLF]                                           | 3,39  | 1 | 2 | 2 | 2   |
| Q9GLD3     | Transferrin receptor protein 1 OS=Canis lupus familiaris GN=TFRC PE=1 SV=1 - [TFR1_CANLF]                                 | 3,38  | 1 | 0 | 2 | 3   |
| F1PEN6     | Transferrin receptor protein 1 OS=Canis lupus familiaris GN=TFRC PE=2 SV=1 - [F1PEN6_CANLF]                               | 3,38  | 1 | 0 | 2 | 3   |
| F1QQO9     | Keratin 17 OS=Canis lupus familiaris GN=KRT17 PE=3 SV=2 - [F1QQO9_CANLF]                                                  | 3,23  | 1 | 0 | 2 | 2   |
| E2R7U2     | Keratin 13 OS=Canis lupus familiaris GN=KRT13 PE=3 SV=2 - [E2R7U2_CANLF]                                                  | 3,2   | 1 | 0 | 2 | 2   |
| E2R7W6     | Uncharacterized protein OS=Canis lupus familiaris GN=KRT42 PE=3 SV=1 - [E2R7W6_CANLF]                                     | 3,09  | 1 | 0 | 2 | 2   |
| E2R8Q7     | Keratin 15 OS=Canis lupus familiaris GN=KRT15 PE=3 SV=2 - [E2R8Q7_CANLF]                                                  | 3,06  | 1 | 0 | 2 | 2   |
| J9P4H9     | Keratin 13 OS=Canis lupus familiaris GN=KRT13 PE=3 SV=1 - [J9P4H9_CANLF]                                                  | 3,05  | 1 | 0 | 2 | 2   |
| J9P4Q9     | Keratin 15 OS=Canis lupus familiaris GN=KRT15 PE=3 SV=1 - [J9P4Q9_CANLF]                                                  | 2,97  | 1 | 0 | 2 | 2   |
| F1QOR0     | Keratin 14 OS=Canis lupus familiaris GN=KRT14 PE=3 SV=2 - [F1QOR0_CANLF]                                                  | 2,9   | 1 | 0 | 2 | 2   |
| J9NWS3     | Keratin, type I cytoskeletal 9 OS=Canis lupus familiaris GN=KRT9 PE=3 SV=1 - [J9NWS3_CANLF]                               | 2,69  | 1 | 0 | 2 | 15  |
| H9GWY1     | Inter-alpha-trypsin inhibitor heavy chain family member 4 OS=Canis lupus familiaris GN=TIH4 PE=4 SV=2 - [H9GWY1_CANLF]    | 2,61  | 1 | 0 | 2 | 3   |
| H2BF45     | Attractin (Fragment) OS=Canis lupus familiaris PE=2 SV=1 - [H2BF45_CANLF]                                                 | 2,6   | 1 | 0 | 2 | 2   |
| E2R150     | Keratin 24 OS=Canis lupus familiaris GN=KRT24 PE=3 SV=2 - [E2R150_CANLF]                                                  | 2,59  | 1 | 0 | 2 | 2   |

|            |                                                                                                                       |       |   |   |   |    |
|------------|-----------------------------------------------------------------------------------------------------------------------|-------|---|---|---|----|
| J9P01      | Keratin, type I cytoskeletal 9 OS=Canis lupus familiaris GN=KRT9 PE=3 SV=1 - [J9P01_CANLF]                            | 2,58  | 1 | 0 | 2 | 15 |
| F1Q0N7     | Keratin, type I cytoskeletal 9 OS=Canis lupus familiaris GN=KRT9 PE=3 SV=1 - [F1Q0N7_CANLF]                           | 2,47  | 1 | 0 | 2 | 15 |
| E2RR43     | Coiled-coil domain containing 18 OS=Canis lupus familiaris GN=CCDC18 PE=4 SV=2 - [E2RR43_CANLF]                       | 2,41  | 1 | 0 | 2 | 2  |
| J9NUU7     | Coiled-coil domain containing 18 OS=Canis lupus familiaris GN=CCDC18 PE=4 SV=1 - [J9NUU7_CANLF]                       | 2,41  | 1 | 0 | 2 | 2  |
| J9P196     | Coiled-coil domain containing 18 OS=Canis lupus familiaris GN=CCDC18 PE=4 SV=1 - [J9P196_CANLF]                       | 2,33  | 1 | 0 | 2 | 2  |
| O18740     | Keratin, type I cytoskeletal 9 OS=Canis lupus familiaris GN=KRT9 PE=3 SV=1 - [K1C9_CANLF]                             | 2,04  | 1 | 0 | 2 | 15 |
| F1PG69     | Collagen type III alpha 1 chain OS=Canis lupus familiaris GN=COL3A1 PE=4 SV=2 - [F1PG69_CANLF]                        | 1,43  | 1 | 0 | 2 | 7  |
| J9P0L0     | Collagen type III alpha 1 chain OS=Canis lupus familiaris GN=COL3A1 PE=4 SV=1 - [J9P0L0_CANLF]                        | 1,43  | 1 | 0 | 2 | 7  |
| F1PBV8     | A-kinase anchoring protein 9 OS=Canis lupus familiaris GN=AKAP9 PE=4 SV=2 - [F1PBV8_CANLF]                            | 0,31  | 1 | 0 | 2 | 7  |
| J9P4D9     | A-kinase anchoring protein 9 OS=Canis lupus familiaris GN=AKAP9 PE=4 SV=1 - [J9P4D9_CANLF]                            | 0,3   | 1 | 0 | 2 | 7  |
| E2RGB0     | Uncharacterized protein OS=Canis lupus familiaris PE=4 SV=2 - [E2RGB0_CANLF]                                          | 20,66 | 1 | 2 | 2 | 3  |
| E2RRN8     | Vasorin OS=Canis lupus familiaris GN=VASN PE=4 SV=1 - [E2RRN8_CANLF]                                                  | 6,7   | 1 | 2 | 2 | 6  |
| F1PAB0     | Uncharacterized protein OS=Canis lupus familiaris PE=4 SV=2 - [F1PAB0_CANLF]                                          | 5,27  | 1 | 2 | 2 | 2  |
| J9P654     | Peptidoglycan recognition protein 2 OS=Canis lupus familiaris GN=PGLYRP2 PE=4 SV=1 - [J9P654_CANLF]                   | 8,82  | 1 | 0 | 2 | 2  |
| F6XZU1     | Peptidoglycan recognition protein 2 OS=Canis lupus familiaris GN=PGLYRP2 PE=4 SV=1 - [F6XZU1_CANLF]                   | 7,83  | 1 | 0 | 2 | 2  |
| J9P7Q8     | Carboxylic ester hydrolase OS=Canis lupus familiaris GN=CEL PE=3 SV=1 - [J9P7Q8_CANLF]                                | 4,35  | 1 | 0 | 2 | 13 |
| F1PHD0     | Carboxyl ester lipase OS=Canis lupus familiaris GN=CEL PE=3 SV=1 - [F1PHD0_CANLF]                                     | 3,93  | 1 | 0 | 2 | 13 |
| F6Y3P9     | Gelsolin OS=Canis lupus familiaris GN=GSN PE=4 SV=1 - [F6Y3P9_CANLF]                                                  | 3,58  | 1 | 2 | 2 | 2  |
| E2RPP1     | Laminin subunit alpha 3 OS=Canis lupus familiaris GN=LAMA3 PE=4 SV=2 - [E2RPP1_CANLF]                                 | 1,86  | 1 | 2 | 2 | 2  |
| F1Q2D1     | Centrosomal protein 290 OS=Canis lupus familiaris GN=CEP290 PE=4 SV=2 - [F1Q2D1_CANLF]                                | 0,87  | 1 | 0 | 2 | 3  |
| E2R0F5     | Centrosomal protein 290 OS=Canis lupus familiaris GN=CEP290 PE=4 SV=1 - [E2R0F5_CANLF]                                | 0,85  | 1 | 0 | 2 | 3  |
| F1PEV3     | Deltex E3 ubiquitin ligase 3L OS=Canis lupus familiaris GN=DTX3L PE=4 SV=2 - [F1PEV3_CANLF]                           | 3,26  | 1 | 1 | 2 | 2  |
| Q9TV65     | Angiotensinogen (Fragment) OS=Canis lupus familiaris PE=2 SV=1 - [Q9TV65_CANLF]                                       | 20,44 | 1 | 0 | 2 | 10 |
| F6X7L0     | Tropomyosin 4 OS=Canis lupus familiaris GN=TPM4 PE=3 SV=1 - [F6X7L0_CANLF]                                            | 8,45  | 1 | 0 | 2 | 3  |
| F1PCH3     | Enolase 1 OS=Canis lupus familiaris GN=ENO1 PE=3 SV=2 - [F1PCH3_CANLF]                                                | 7,69  | 1 | 0 | 2 | 6  |
| A0A0N9JE84 | Tropomyosin 4 delta OS=Canis lupus familiaris GN=Tpm4 PE=2 SV=1 - [A0A0N9JE84_CANLF]                                  | 8,45  | 1 | 0 | 2 | 3  |
| O62755     | Pyruvate kinase M (Fragment) OS=Canis lupus familiaris PE=2 SV=1 - [O62755_CANLF]                                     | 41,38 | 1 | 0 | 2 | 2  |
| F1PJP1     | Dynein axonemal heavy chain 11 OS=Canis lupus familiaris GN=DNAH11 PE=4 SV=2 - [F1PJP1_CANLF]                         | 0,97  | 1 | 0 | 2 | 2  |
| J9P9P6     | Dynein axonemal heavy chain 11 OS=Canis lupus familiaris GN=DNAH11 PE=4 SV=1 - [J9P9P6_CANLF]                         | 0,97  | 1 | 0 | 2 | 2  |
| Q2YF02     | Vitronectin (Fragment) OS=Canis lupus familiaris PE=4 SV=1 - [Q2YF02_CANLF]                                           | 40,54 | 1 | 0 | 2 | 7  |
| E2RMA3     | Secreted protein acidic and cysteine rich OS=Canis lupus familiaris GN=SPARC PE=4 SV=1 - [E2RMA3_CANLF]               | 13,53 | 1 | 2 | 2 | 3  |
| F1PHN8     | Serpin family A member 4 OS=Canis lupus familiaris GN=SERPINA4 PE=3 SV=2 - [F1PHN8_CANLF]                             | 6,35  | 1 | 2 | 2 | 6  |
| P19540     | Coagulation factor IX OS=Canis lupus familiaris GN=F9 PE=1 SV=1 - [FA9_CANLF]                                         | 6,19  | 1 | 0 | 2 | 7  |
| G1K2D7     | Coagulation factor IX OS=Canis lupus familiaris GN=F9 PE=3 SV=1 - [G1K2D7_CANLF]                                      | 6,1   | 1 | 0 | 2 | 7  |
| E2R8F7     | Myosin light chain 3 OS=Canis lupus familiaris GN=MYL3 PE=4 SV=2 - [E2R8F7_CANLF]                                     | 10,48 | 1 | 2 | 2 | 2  |
| E2R120     | Four and a half LIM domains 1 OS=Canis lupus familiaris GN=FHL1 PE=4 SV=2 - [E2R120_CANLF]                            | 8,45  | 1 | 2 | 2 | 3  |
| E2REZ4     | Coiled-coil and C2 domain containing 2A OS=Canis lupus familiaris GN=CC2D2A PE=4 SV=2 - [E2REZ4_CANLF]                | 2,96  | 1 | 2 | 2 | 3  |
| E2RT39     | Uncharacterized protein OS=Canis lupus familiaris PE=3 SV=2 - [E2RT39_CANLF]                                          | 2,14  | 1 | 0 | 2 | 18 |
| J9NV81     | ALG13, UDP-N-acetylglucosaminyltransferase subunit OS=Canis lupus familiaris GN=ALG13 PE=4 SV=1 - [J9NV81_CANLF]      | 2,86  | 1 | 2 | 2 | 3  |
| F1P6B7     | Annexin OS=Canis lupus familiaris GN=ANXA1 PE=3 SV=1 - [F1P6B7_CANLF]                                                 | 6,96  | 1 | 2 | 2 | 5  |
| F2Z4N0     | Uncharacterized protein OS=Canis lupus familiaris GN=ACTA2 PE=3 SV=1 - [F2Z4N0_CANLF]                                 | 6,1   | 1 | 0 | 2 | 3  |
| J9PB40     | ErbB2 interacting protein OS=Canis lupus familiaris GN=ERBIN PE=4 SV=1 - [J9PB40_CANLF]                               | 0,92  | 1 | 0 | 2 | 3  |
| E2QWR8     | ErbB2 interacting protein OS=Canis lupus familiaris GN=ERBIN PE=4 SV=2 - [E2QWR8_CANLF]                               | 0,85  | 1 | 0 | 2 | 3  |
| J9P2B7     | Histone H2A OS=Canis lupus familiaris GN=LOC611231 PE=3 SV=1 - [J9P2B7_CANLF]                                         | 17,97 | 1 | 0 | 2 | 4  |
| E2QX34     | Histone H2A OS=Canis lupus familiaris PE=3 SV=2 - [E2QX34_CANLF]                                                      | 17,97 | 1 | 0 | 2 | 4  |
| F1PF26     | Histone H2A OS=Canis lupus familiaris GN=LOC488254 PE=3 SV=2 - [F1PF26_CANLF]                                         | 17,97 | 1 | 0 | 2 | 4  |
| F1PF27     | Histone H2A OS=Canis lupus familiaris GN=HIST2H2AC PE=3 SV=2 - [F1PF27_CANLF]                                         | 17,83 | 1 | 0 | 2 | 4  |
| L7N0D9     | Histone H2A OS=Canis lupus familiaris GN=H2AFJ PE=3 SV=1 - [L7N0D9_CANLF]                                             | 17,83 | 1 | 0 | 2 | 4  |
| J9JHP2     | Histone H2A OS=Canis lupus familiaris GN=LOC100856200 PE=3 SV=1 - [J9JHP2_CANLF]                                      | 17,69 | 1 | 0 | 2 | 4  |
| J9P664     | Histone H2A OS=Canis lupus familiaris GN=LOC100855609 PE=3 SV=1 - [J9P664_CANLF]                                      | 17,69 | 1 | 0 | 2 | 4  |
| J9NRH7     | Histone H2A OS=Canis lupus familiaris GN=LOC106558252 PE=3 SV=1 - [J9NRH7_CANLF]                                      | 17,69 | 1 | 0 | 2 | 4  |
| J9PM9      | Histone H2A OS=Canis lupus familiaris GN=LOC488297 PE=3 SV=1 - [J9PM9_CANLF]                                          | 17,69 | 1 | 0 | 2 | 4  |
| J9POL5     | Histone H2A OS=Canis lupus familiaris GN=HIST2H2AA PE=3 SV=1 - [J9POL5_CANLF]                                         | 17,69 | 1 | 0 | 2 | 4  |
| F1P790     | Histone H2A OS=Canis lupus familiaris GN=HIST3H2A PE=3 SV=2 - [F1P790_CANLF]                                          | 17,69 | 1 | 0 | 2 | 4  |
| J9P5B1     | Histone H2A OS=Canis lupus familiaris GN=LOC488289 PE=3 SV=1 - [J9P5B1_CANLF]                                         | 17,69 | 1 | 0 | 2 | 4  |
| F1P7D1     | Histone H2A OS=Canis lupus familiaris GN=HIST1H2AA PE=3 SV=2 - [F1P7D1_CANLF]                                         | 17,56 | 1 | 0 | 2 | 4  |
| J9NZY9     | Histone H2A OS=Canis lupus familiaris PE=3 SV=1 - [J9NZY9_CANLF]                                                      | 17,16 | 1 | 0 | 2 | 4  |
| J9P0B2     | Histone H2A OS=Canis lupus familiaris GN=LOC488291 PE=3 SV=1 - [J9P0B2_CANLF]                                         | 17,04 | 1 | 0 | 2 | 4  |
| E2RN80     | Histone H2A OS=Canis lupus familiaris GN=H2AFX PE=3 SV=1 - [E2RN80_CANLF]                                             | 16,08 | 1 | 0 | 2 | 4  |
| F6XE7      | Follicle-stimulating hormone receptor OS=Canis lupus familiaris GN=FSHR PE=3 SV=1 - [F6XE7_CANLF]                     | 8,56  | 1 | 1 | 2 | 3  |
| J9P556     | Uncharacterized protein OS=Canis lupus familiaris GN=LOC490399 PE=4 SV=1 - [J9P556_CANLF]                             | 6,83  | 1 | 0 | 2 | 4  |
| E2R8K8     | Uncharacterized protein OS=Canis lupus familiaris GN=LOC490399 PE=4 SV=2 - [E2R8K8_CANLF]                             | 6,81  | 1 | 0 | 2 | 4  |
| F1P5C8     | Tyrosine-protein kinase OS=Canis lupus familiaris GN=SYK PE=3 SV=1 - [F1P5C8_CANLF]                                   | 6     | 1 | 1 | 2 | 2  |
| F1PLV6     | Fibulin-1 OS=Canis lupus familiaris GN=FBLN1 PE=3 SV=2 - [F1PLV6_CANLF]                                               | 5,08  | 1 | 2 | 2 | 9  |
| E2R1C3     | Proteasome subunit alpha type OS=Canis lupus familiaris PE=3 SV=2 - [E2R1C3_CANLF]                                    | 16,53 | 1 | 2 | 2 | 4  |
| A0A0E3ZQ59 | XynC protein OS=Pasteurella multocida subsp. multocida OH4807 GN=I926_08580 PE=4 SV=1 - [A0A0E3ZQ59_CANLF]            | 15,24 | 1 | 2 | 2 | 2  |
| F1PUB5     | Proteasome endopeptidase complex OS=Canis lupus familiaris GN=PSMA7 PE=3 SV=2 - [F1PUB5_CANLF]                        | 13,24 | 1 | 1 | 2 | 2  |
| Q2VCP3     | von Willebrand factor (Fragment) OS=Canis lupus familiaris GN=VWF PE=4 SV=1 - [Q2VCP3_CANLU]                          | 10,66 | 1 | 0 | 2 | 4  |
| C7G0S1     | von Willebrand factor (Fragment) OS=Canis lupus familiaris GN=VWF PE=4 SV=1 - [C7G0S1_CANLU]                          | 6,57  | 1 | 0 | 2 | 4  |
| F1PCS8     | CD93 molecule OS=Canis lupus familiaris GN=CD93 PE=4 SV=1 - [F1PCS8_CANLF]                                            | 4,94  | 1 | 2 | 2 | 3  |
| F1PF31     | Tenascin C OS=Canis lupus familiaris GN=TNC PE=4 SV=1 - [F1PF31_CANLF]                                                | 1,43  | 1 | 0 | 2 | 3  |
| J9NRP5     | Tenascin C OS=Canis lupus familiaris GN=TNC PE=4 SV=1 - [J9NRP5_CANLF]                                                | 1,34  | 1 | 0 | 2 | 3  |
| J9NUH6     | Uncharacterized protein OS=Canis lupus familiaris PE=4 SV=1 - [J9NUH6_CANLF]                                          | 11,19 | 1 | 0 | 2 | 2  |
| E2R161     | Secreted phosphoprotein 1 OS=Canis lupus familiaris GN=SP1 PE=4 SV=1 - [E2R161_CANLF]                                 | 12,04 | 1 | 0 | 2 | 7  |
| E2R231     | Dickkopf WNT signaling pathway inhibitor 3 OS=Canis lupus familiaris GN=DKK3 PE=4 SV=2 - [E2R231_CANLF]               | 11,53 | 1 | 0 | 2 | 8  |
| E2RNR9     | Osteomodulin OS=Canis lupus familiaris GN=OMD PE=4 SV=2 - [E2RNR9_CANLF]                                              | 4,81  | 1 | 0 | 2 | 4  |
| J9P319     | Osteomodulin OS=Canis lupus familiaris GN=OMD PE=4 SV=1 - [J9P319_CANLF]                                              | 4,83  | 1 | 0 | 2 | 4  |
| Q3HTT3     | Osteopontin (Fragment) OS=Canis lupus familiaris PE=2 SV=1 - [Q3HTT3_CANLF]                                           | 11,28 | 1 | 1 | 2 | 24 |
| WORY37     | Dickkopf 3 homolog OS=Canis lupus familiaris GN=Dkk-3 PE=2 SV=1 - [WORY37_CANLF]                                      | 11,49 | 1 | 0 | 2 | 8  |
| E2QYM7     | Thrombospondin 3 OS=Canis lupus familiaris GN=THBS3 PE=4 SV=1 - [E2QYM7_CANLF]                                        | 4,71  | 1 | 1 | 2 | 4  |
| F1PE53     | Rho associated coiled-coil containing protein kinase 2 OS=Canis lupus familiaris GN=ROCK2 PE=3 SV=2 - [F1PE53_CANLF]  | 1,15  | 1 | 2 | 2 | 2  |
| A0A0M5JRD3 | Fibrinogen gamma chain (Fragment) OS=Canis lupus baileyi GN=FGG PE=4 SV=1 - [A0A0M5JRD3_CANLU]                        | 91,3  | 1 | 0 | 1 | 20 |
| A0A0H4NYY6 | Plasminogen (Fragment) OS=Canis lupus familiaris GN=plg PE=4 SV=1 - [A0A0H4NYY6_CANLF]                                | 88    | 1 | 0 | 1 | 67 |
| P68213     | Fibrinogen alpha chain (Fragment) OS=Canis lupus familiaris GN=FGA PE=1 SV=1 - [FIBA_CANLF]                           | 42,86 | 1 | 0 | 1 | 1  |
| P01784     | Ig heavy chain V region GOM OS=Canis lupus familiaris PE=1 SV=1 - [HV01_CANLF]                                        | 16,67 | 1 | 0 | 1 | 61 |
| E2QYB1     | Uncharacterized protein OS=Canis lupus familiaris PE=4 SV=2 - [E2QYB1_CANLF]                                          | 14,61 | 1 | 0 | 1 | 5  |
| L7N0L4     | Uncharacterized protein OS=Canis lupus familiaris PE=4 SV=1 - [L7N0L4_CANLF]                                          | 14,18 | 1 | 0 | 1 | 61 |
| P01785     | Ig heavy chain V region MOO OS=Canis lupus familiaris PE=1 SV=1 - [HV02_CANLF]                                        | 13,68 | 1 | 1 | 1 | 1  |
| E2R8C5     | Immunoglobulin lambda variable 2-33 (non-functional) OS=Canis lupus familiaris GN=IGLV2-33 PE=4 SV=2 - [E2R8C5_CANLF] | 12,9  | 1 | 1 | 1 | 10 |
| L7N0G5     | Uncharacterized protein OS=Canis lupus familiaris PE=4 SV=1 - [L7N0G5_CANLF]                                          | 12,75 | 1 | 0 | 1 | 5  |
| P01618     | Ig kappa chain V region GOM OS=Canis lupus familiaris PE=1 SV=1 - [KV1_CANLF]                                         | 12,04 | 1 | 0 | 1 | 5  |
| L7N0J0     | Uncharacterized protein OS=Canis lupus familiaris PE=4 SV=1 - [L7N0J0_CANLF]                                          | 11,35 | 1 | 0 | 1 | 3  |
| J9PAL2     | Uncharacterized protein OS=Canis lupus familiaris PE=4 SV=1 - [J9PAL2_CANLF]                                          | 10,66 | 1 | 0 | 1 | 5  |



|            |                                                                                                                                   |       |   |   |   |    |
|------------|-----------------------------------------------------------------------------------------------------------------------------------|-------|---|---|---|----|
| J9PAM5     | Uncharacterized protein OS=Canis lupus familiaris PE=4 SV=1 - [J9PAM5_CANLF]                                                      | 10,32 | 1 | 0 | 1 | 5  |
| L7N0P9     | Uncharacterized protein OS=Canis lupus familiaris PE=4 SV=1 - [L7N0P9_CANLF]                                                      | 10,32 | 1 | 0 | 1 | 5  |
| F1PPK4     | Uncharacterized protein OS=Canis lupus familiaris PE=4 SV=2 - [F1PPK4_CANLF]                                                      | 10,16 | 1 | 0 | 1 | 5  |
| J9NTU3     | FGFR10P N-terminal like OS=Canis lupus familiaris GN=FOPNL PE=4 SV=1 - [J9NTU3_CANLF]                                             | 9,77  | 1 | 1 | 1 | 2  |
| J9NVV7     | Uncharacterized protein OS=Canis lupus familiaris PE=4 SV=1 - [J9NVV7_CANLF]                                                      | 9,77  | 1 | 0 | 1 | 5  |
| J9NSV4     | Immunoglobulin heavy constant mu OS=Canis lupus familiaris GN=IGHM PE=4 SV=1 - [J9NSV4_CANLF]                                     | 9,48  | 1 | 0 | 1 | 1  |
| L7NOJ5     | Uncharacterized protein OS=Canis lupus familiaris PE=4 SV=1 - [L7NOJ5_CANLF]                                                      | 9,41  | 1 | 1 | 1 | 1  |
| J9PAP4     | Uncharacterized protein OS=Canis lupus familiaris PE=4 SV=1 - [J9PAP4_CANLF]                                                      | 9,38  | 1 | 0 | 1 | 1  |
| F1PKL6     | Uncharacterized protein OS=Canis lupus familiaris PE=4 SV=2 - [F1PKL6_CANLF]                                                      | 8,22  | 1 | 1 | 1 | 6  |
| E2R047     | Uncharacterized protein OS=Canis lupus familiaris GN=BLOC1S1 PE=4 SV=2 - [E2R047_CANLF]                                           | 8     | 1 | 1 | 1 | 1  |
| F1PVJ7     | Uncharacterized protein OS=Canis lupus familiaris PE=4 SV=2 - [F1PVJ7_CANLF]                                                      | 7,54  | 1 | 1 | 1 | 1  |
| J9P477     | PAXX, non-homologous end joining factor OS=Canis lupus familiaris GN=PAXX PE=4 SV=1 - [J9P477_CANLF]                              | 6,95  | 1 | 0 | 1 | 1  |
| F6XGN4     | PAXX, non-homologous end joining factor OS=Canis lupus familiaris GN=PAXX PE=4 SV=1 - [F6XGN4_CANLF]                              | 6,37  | 1 | 0 | 1 | 1  |
| E2QUU8     | Uncharacterized protein OS=Canis lupus familiaris PE=4 SV=2 - [E2QUU8_CANLF]                                                      | 6,21  | 1 | 0 | 1 | 4  |
| M9PM25     | RNA-binding protein Raly short isoform OS=Canis lupus familiaris GN=RALY PE=2 SV=1 - [M9PM25_CANLF]                               | 6,14  | 1 | 0 | 1 | 2  |
| E2RLM4     | Cyclin dependent kinase 6 OS=Canis lupus familiaris GN=CDKG PE=3 SV=1 - [E2RLM4_CANLF]                                            | 6,13  | 1 | 1 | 1 | 1  |
| A0A059Q851 | Cytochrome b (Fragment) OS=Canis lupus familiaris GN=CYTB PE=3 SV=1 - [A0A059Q851_CANLF]                                          | 6,02  | 1 | 0 | 1 | 1  |
| B2XXZ0     | Phosphoprotein OS=Mokola virus GN=P PE=3 SV=1 - [B2XXZ0_MOKV]                                                                     | 5,94  | 1 | 0 | 1 | 2  |
| B2XXZ5     | Phosphoprotein OS=Mokola virus GN=P PE=3 SV=1 - [B2XXZ5_MOKV]                                                                     | 5,94  | 1 | 0 | 1 | 2  |
| A0A051U081 | Glial fibrillary acidic protein transcript variant gamma OS=Canis lupus familiaris GN=GFAP PE=2 SV=1 - [A0A051U081_CANLF]         | 5,85  | 1 | 0 | 1 | 2  |
| E2R552     | RALY heterogeneous nuclear ribonucleoprotein OS=Canis lupus familiaris GN=RALY PE=4 SV=1 - [E2R552_CANLF]                         | 5,8   | 1 | 0 | 1 | 2  |
| J9NTG9     | Eukaryotic translation initiation factor 3 subunit I OS=Canis lupus familiaris GN=EIF3I PE=4 SV=1 - [J9NTG9_CANLF]                | 5,74  | 1 | 0 | 1 | 3  |
| A0A0M4HNB4 | Apolipoprotein B-100 (Fragment) OS=Canis lupus familiaris GN=APOB PE=4 SV=1 - [A0A0M4HNB4_CANLF]                                  | 5,61  | 1 | 0 | 1 | 2  |
| A0A0M5JRC1 | Apolipoprotein B-100 (Fragment) OS=Canis lupus familiaris GN=APOB PE=4 SV=1 - [A0A0M5JRC1_CANLF]                                  | 5,61  | 1 | 0 | 1 | 2  |
| D6N0H1     | Apolipoprotein B (Fragment) OS=Canis lupus familiaris GN=APOB PE=4 SV=1 - [D6N0H1_CANLF]                                          | 5,43  | 1 | 0 | 1 | 2  |
| Q3ZE88     | Apolipoprotein B (Fragment) OS=Canis lupus familiaris GN=APOB PE=4 SV=1 - [Q3ZE88_CANLF]                                          | 5,43  | 1 | 0 | 1 | 2  |
| E2RTL7     | Uncharacterized protein OS=Canis lupus familiaris GN=RTPA PE=4 SV=2 - [E2RTL7_CANLF]                                              | 5,37  | 1 | 1 | 1 | 1  |
| C7G0N2     | Apolipoprotein B (Fragment) OS=Canis lupus familiaris GN=APOB PE=4 SV=1 - [C7G0N2_CANLF]                                          | 5,31  | 1 | 0 | 1 | 2  |
| H8Y2Y6     | Cytochrome b OS=Canis lupus familiaris GN=CYTB PE=3 SV=1 - [H8Y2Y6_CANLF]                                                         | 5,28  | 1 | 0 | 1 | 1  |
| Q49RE5     | Cytochrome b OS=Canis lupus familiaris GN=CYTB PE=3 SV=1 - [Q49RE5_CANLF]                                                         | 5,28  | 1 | 0 | 1 | 1  |
| E2RQF8     | Uncharacterized protein OS=Canis lupus familiaris PE=4 SV=2 - [E2RQF8_CANLF]                                                      | 5,11  | 1 | 1 | 1 | 2  |
| J9IH97     | Transient receptor potential cation channel subfamily M member 1 OS=Canis lupus familiaris GN=TRPM1 PE=4 SV=1 - [J9IH97_CANLF]    | 4,76  | 1 | 0 | 1 | 2  |
| J9P831     | Uncharacterized protein OS=Canis lupus familiaris GN=LOC491421 PE=4 SV=1 - [J9P831_CANLF]                                         | 4,75  | 1 | 1 | 1 | 2  |
| J9P8U3     | Uncharacterized protein OS=Canis lupus familiaris PE=4 SV=1 - [J9P8U3_CANLF]                                                      | 4,53  | 1 | 0 | 1 | 15 |
| J9P8U8     | RWD domain containing 1 OS=Canis lupus familiaris GN=RWDD1 PE=4 SV=1 - [J9P8U8_CANLF]                                             | 4,53  | 1 | 1 | 1 | 1  |
| E2RLY1     | Cysteine protease OS=Canis lupus familiaris GN=ATG4A PE=3 SV=2 - [E2RLY1_CANLF]                                                   | 4,51  | 1 | 1 | 1 | 2  |
| F1PD33     | Peptidyl-prolyl cis-trans isomerase OS=Canis lupus familiaris GN=PPIL6 PE=3 SV=1 - [F1PD33_CANLF]                                 | 4,51  | 1 | 1 | 1 | 1  |
| F1P8E4     | Mitochondrial ribosomal protein L39 OS=Canis lupus familiaris GN=MRPL39 PE=4 SV=2 - [F1P8E4_CANLF]                                | 4,48  | 1 | 1 | 1 | 1  |
| A0A0E3ZPC2 | Penicillin-binding protein 2 OS=Pasteurella multocida subsp. multocida OH4807 GN=1926_04260 PE=4 SV=1 - [A0A0E3ZPC2_CANLF]        | 4,35  | 1 | 0 | 1 | 1  |
| F1Q187     | Interleukin 3 receptor subunit alpha OS=Canis lupus familiaris GN=IL3RA PE=4 SV=2 - [F1Q187_CANLF]                                | 4,32  | 1 | 1 | 1 | 1  |
| J9P8B0     | Dipeptidyl peptidase 4 OS=Canis lupus familiaris GN=DPP4 PE=4 SV=1 - [J9P8B0_CANLF]                                               | 4,32  | 1 | 0 | 1 | 2  |
| E2R4Z8     | High mobility group 20B OS=Canis lupus familiaris GN=HMG20B PE=4 SV=1 - [E2R4Z8_CANLF]                                            | 4,11  | 1 | 1 | 1 | 2  |
| P06871     | Cationic trypsin OS=Canis lupus familiaris PE=2 SV=1 - [TRY1_CANLF]                                                               | 4,07  | 1 | 0 | 1 | 18 |
| F1PCE8     | Uncharacterized protein OS=Canis lupus familiaris GN=LOC475521 PE=3 SV=1 - [F1PCE8_CANLF]                                         | 4,07  | 1 | 0 | 1 | 18 |
| E2RHG2     | Uncharacterized protein OS=Canis lupus familiaris GN=PRDX1 PE=4 SV=1 - [E2RHG2_CANLF]                                             | 4,02  | 1 | 0 | 1 | 1  |
| H9GW62     | Uncharacterized protein OS=Canis lupus familiaris PE=4 SV=1 - [H9GW62_CANLF]                                                      | 3,99  | 1 | 0 | 1 | 1  |
| E2R3K2     | Cytochrome P450 family 2 subfamily R member 1 OS=Canis lupus familiaris GN=CYP2R1 PE=3 SV=1 - [E2R3K2_CANLF]                      | 3,99  | 1 | 1 | 1 | 1  |
| F1PWG0     | Uncharacterized protein OS=Canis lupus familiaris GN=IFIT5 PE=4 SV=2 - [F1PWG0_CANLF]                                             | 3,94  | 1 | 1 | 1 | 1  |
| E2RKT9     | Ubiquitin conjugating enzyme E2 L5, pseudogene OS=Canis lupus familiaris GN=UBE2L5P PE=3 SV=1 - [E2RKT9_CANLF]                    | 3,9   | 1 | 0 | 1 | 1  |
| F1PHI1     | RIC8 guanine nucleotide exchange factor B OS=Canis lupus familiaris GN=RIC8B PE=4 SV=2 - [F1PHI1_CANLF]                           | 3,85  | 1 | 0 | 1 | 1  |
| F1PG16     | Uncharacterized protein OS=Canis lupus familiaris GN=CD5L PE=4 SV=2 - [F1PG16_CANLF]                                              | 3,82  | 1 | 0 | 1 | 1  |
| W8VYQ1     | Apoptosis inhibitor of macrophage OS=Canis lupus familiaris GN=CD5L PE=2 SV=1 - [W8VYQ1_CANLF]                                    | 3,82  | 1 | 0 | 1 | 1  |
| F1PHI2     | RIC8 guanine nucleotide exchange factor B OS=Canis lupus familiaris GN=RIC8B PE=4 SV=2 - [F1PHI2_CANLF]                           | 3,78  | 1 | 0 | 1 | 1  |
| F1PAX5     | Uncharacterized protein OS=Canis lupus familiaris GN=CD5L PE=4 SV=2 - [F1PAX5_CANLF]                                              | 3,75  | 1 | 0 | 1 | 1  |
| E2RG47     | Dolichyl-diphosphooligosaccharide--protein glycosyltransferase subunit STT3B OS=Canis lupus familiaris GN=STT3B                   | 3,63  | 1 | 1 | 1 | 1  |
| J9PAG6     | Growth arrest specific 8 OS=Canis lupus familiaris GN=GAS8 PE=4 SV=1 - [J9PAG6_CANLF]                                             | 3,56  | 1 | 0 | 1 | 1  |
| F1P7H0     | Growth arrest specific 8 OS=Canis lupus familiaris GN=GAS8 PE=4 SV=2 - [F1P7H0_CANLF]                                             | 3,51  | 1 | 0 | 1 | 1  |
| J9P488     | Uncharacterized protein n=1 Tax=Canis lupus familiaris RepID=J9P488_CANLF                                                         | 3,24  | 1 | 0 | 1 | 1  |
| Q95LG6     | Skeletal muscle ryanodine receptor (Fragment) OS=Canis lupus familiaris GN=RYR1 PE=2 SV=1 - [Q95LG6_CANLF]                        | 3,13  | 1 | 1 | 1 | 1  |
| E2RM11     | Nucleobindin 2 OS=Canis lupus familiaris GN=NUCB2 PE=4 SV=2 - [E2RM11_CANLF]                                                      | 3,1   | 1 | 1 | 1 | 3  |
| E2R984     | Polycomb group ring finger 1 OS=Canis lupus familiaris GN=PCGF1 PE=4 SV=2 - [E2R984_CANLF]                                        | 3,09  | 1 | 1 | 1 | 1  |
| F6X6Y7     | Transcription elongation factor A3 OS=Canis lupus familiaris GN=TCEA3 PE=4 SV=1 - [F6X6Y7_CANLF]                                  | 2,99  | 1 | 0 | 1 | 1  |
| E2R1N7     | Prenylcysteine oxidase 1 OS=Canis lupus familiaris GN=PCYOX1 PE=3 SV=1 - [E2R1N7_CANLF]                                           | 2,97  | 1 | 1 | 1 | 1  |
| F1PP29     | Immunoglobulin heavy constant epsilon OS=Canis lupus familiaris GN=IGHG PE=4 SV=1 - [F1PP29_CANLF]                                | 2,95  | 1 | 1 | 1 | 1  |
| J9NZM2     | Uncharacterized protein OS=Canis lupus familiaris PE=4 SV=1 - [J9NZM2_CANLF]                                                      | 2,87  | 1 | 0 | 1 | 1  |
| E2RLF1     | Prosaposin OS=Canis lupus familiaris GN=PSAP PE=4 SV=1 - [E2RLF1_CANLF]                                                           | 2,86  | 1 | 1 | 1 | 4  |
| J9NZ31     | Protein-L-isoaspartate (D-aspartate) O-methyltransferase domain containing 1 OS=Canis lupus familiaris GN=PLMT1                   | 2,81  | 1 | 0 | 1 | 5  |
| E2RI96     | Protein-L-isoaspartate (D-aspartate) O-methyltransferase domain containing 1 OS=Canis lupus familiaris GN=PLMT1                   | 2,77  | 1 | 0 | 1 | 5  |
| L7N096     | Keratin 4 OS=Canis lupus familiaris GN=LOC608027 PE=3 SV=1 - [L7N096_CANLF]                                                       | 2,67  | 1 | 0 | 1 | 2  |
| E2RCT8     | Uncharacterized protein OS=Canis lupus familiaris PE=3 SV=2 - [E2RCT8_CANLF]                                                      | 2,65  | 1 | 0 | 1 | 4  |
| F1PXT2     | Rho guanine nucleotide exchange factor 38 OS=Canis lupus familiaris GN=ARHGEF38 PE=4 SV=2 - [F1PXT2_CANLF]                        | 2,58  | 1 | 0 | 1 | 1  |
| E2QU53     | Rho guanine nucleotide exchange factor 38 OS=Canis lupus familiaris GN=ARHGEF38 PE=4 SV=2 - [E2QU53_CANLF]                        | 2,57  | 1 | 0 | 1 | 1  |
| A0A051U0J7 | Glial fibrillary acidic protein transcript variant delta/epsilon OS=Canis lupus familiaris GN=GFAP PE=2 SV=1 - [A0A051U0J7_CANLF] | 2,55  | 1 | 0 | 1 | 2  |
| A0A051U281 | Glial fibrillary acidic protein transcript variant alpha OS=Canis lupus familiaris GN=GFAP PE=2 SV=1 - [A0A051U281_CANLF]         | 2,54  | 1 | 0 | 1 | 2  |
| E2RS09     | Glial fibrillary acidic protein OS=Canis lupus familiaris GN=GFAP PE=3 SV=1 - [E2RS09_CANLF]                                      | 2,54  | 1 | 0 | 1 | 2  |
| E2R2C8     | Keratin 80 OS=Canis lupus familiaris GN=KRT80 PE=3 SV=1 - [E2R2C8_CANLF]                                                          | 2,43  | 1 | 0 | 1 | 2  |
| F1PB85     | Serpin family A member 7 OS=Canis lupus familiaris GN=SERPINA7 PE=3 SV=2 - [F1PB85_CANLF]                                         | 2,42  | 1 | 1 | 1 | 16 |
| F1PSB5     | Uncharacterized protein OS=Canis lupus familiaris GN=CFH PE=4 SV=2 - [F1PSB5_CANLF]                                               | 2,4   | 1 | 0 | 1 | 2  |
| E2RJG1     | Armadillo repeat containing, X-linked 3 OS=Canis lupus familiaris GN=ARMCX3 PE=4 SV=2 - [E2RJG1_CANLF]                            | 2,37  | 1 | 1 | 1 | 1  |
| E2R5W6     | GC, vitamin D binding protein OS=Canis lupus familiaris GN=GC PE=3 SV=2 - [E2R5W6_CANLF]                                          | 2,32  | 1 | 0 | 1 | 2  |
| E2RIY6     | Transcription elongation factor A3 OS=Canis lupus familiaris GN=TCEA3 PE=4 SV=2 - [E2RIY6_CANLF]                                  | 2,3   | 1 | 0 | 1 | 1  |
| F1PFZ8     | Serine/threonine kinase 40 OS=Canis lupus familiaris GN=STRK40 PE=4 SV=2 - [F1PFZ8_CANLF]                                         | 2,3   | 1 | 1 | 1 | 1  |
| A0A051U0N3 | Glial fibrillary acidic protein transcript variant kappa OS=Canis lupus familiaris GN=GFAP PE=2 SV=1 - [A0A051U0N3_CANLF]         | 2,29  | 1 | 0 | 1 | 2  |
| F1PNZ8     | Uncharacterized protein OS=Canis lupus familiaris PE=4 SV=2 - [F1PNZ8_CANLF]                                                      | 2,27  | 1 | 1 | 1 | 5  |
| F1P841     | GC, vitamin D binding protein OS=Canis lupus familiaris GN=GC PE=3 SV=2 - [F1P841_CANLF]                                          | 2,26  | 1 | 0 | 1 | 2  |
| F1PW98     | Uncharacterized protein OS=Canis lupus familiaris GN=KRT8 PE=3 SV=2 - [F1PW98_CANLF]                                              | 2,23  | 1 | 0 | 1 | 2  |
| J9PB10     | Uncharacterized protein OS=Canis lupus familiaris PE=4 SV=1 - [J9PB10_CANLF]                                                      | 2,21  | 1 | 0 | 1 | 1  |
| F1PJM6     | MAP7 domain containing 3 OS=Canis lupus familiaris GN=MAP7D3 PE=4 SV=2 - [F1PJM6_CANLF]                                           | 2,2   | 1 | 0 | 1 | 2  |
| Q9TU80     | Coxsackie-adenovirus-receptor homolog (Fragment) OS=Canis lupus familiaris PE=2 SV=1 - [Q9TU80_CANLF]                             | 2,19  | 1 | 0 | 1 | 1  |
| J9P314     | Uncharacterized protein OS=Canis lupus familiaris PE=3 SV=1 - [J9P314_CANLF]                                                      | 2,15  | 1 | 1 | 1 | 1  |
| F1PU95     | Htra serine peptidase 1 OS=Canis lupus familiaris GN=HTRA1 PE=4 SV=2 - [F1PU95_CANLF]                                             | 2,13  | 1 | 0 | 1 | 59 |
| E2Q5T8     | Protein phosphatase 1 regulatory subunit 16B OS=Canis lupus familiaris GN=PPP1R16B PE=4 SV=1 - [E2Q5T8_CANLF]                     | 2,11  | 1 | 1 | 1 | 1  |
| F1P9G4     | DEK proto-oncogene OS=Canis lupus familiaris GN=DEK PE=4 SV=2 - [F1P9G4_CANLF]                                                    | 2,1   | 1 | 1 | 1 | 3  |

|            |                                                                                                                 |      |   |   |   |    |
|------------|-----------------------------------------------------------------------------------------------------------------|------|---|---|---|----|
| E2YQY4     | Cytidine monophosphate N-acetylneuraminic acid synthetase OS=Canis lupus familiaris GN=CMAS PE=4 SV=1 -         | 2,07 | 1 | 1 | 1 | 1  |
| J9NVE8     | MAP7 domain containing 3 OS=Canis lupus familiaris GN=MAP7D3 PE=4 SV=1 - [J9NVE8_CANLF]                         | 2,05 | 1 | 0 | 0 | 2  |
| E2REU6     | Uncharacterized protein OS=Canis lupus familiaris GN=KRT18 PE=3 SV=2 - [E2REU6_CANLF]                           | 2,01 | 1 | 0 | 0 | 1  |
| F1Q4H9     | Uncharacterized protein n=1 Tax=Canis lupus familiaris RepID=F1Q4H9_CANLF                                       | 1,95 | 1 | 1 | 1 | 1  |
| A0A189RMP1 | Major outer capsid protein OS=African horse sickness virus 8 GN=VP2 PE=4 SV=1 - [A0A189RMP1_AHSV8]              | 1,89 | 1 | 0 | 0 | 1  |
| A0A189RMT5 | Major outer capsid protein OS=African horse sickness virus 8 GN=VP2 PE=4 SV=1 - [A0A189RMT5_AHSV8]              | 1,89 | 1 | 0 | 0 | 1  |
| A0A0U2DHR4 | VP2 OS=African horse sickness virus 8 GN=VP2 PE=4 SV=1 - [A0A0U2DHR4_AHSV8]                                     | 1,89 | 1 | 0 | 0 | 1  |
| A0A0U2DD11 | VP2 OS=African horse sickness virus 8 GN=VP2 PE=4 SV=1 - [A0A0U2DD11_AHSV8]                                     | 1,89 | 1 | 0 | 0 | 1  |
| A0A189RMR3 | Major outer capsid protein OS=African horse sickness virus 8 GN=VP2 PE=4 SV=1 - [A0A189RMR3_AHSV8]              | 1,89 | 1 | 0 | 0 | 1  |
| A0A0U2DGT4 | VP2 OS=African horse sickness virus 8 GN=VP2 PE=4 SV=1 - [A0A0U2DGT4_AHSV8]                                     | 1,89 | 1 | 0 | 0 | 1  |
| E2R489     | Keratin 84 OS=Canis lupus familiaris GN=KRT84 PE=3 SV=1 - [E2R489_CANLF]                                        | 1,88 | 1 | 0 | 0 | 2  |
| E2R568     | Keratin 4 OS=Canis lupus familiaris GN=LOC608027 PE=3 SV=2 - [E2R568_CANLF]                                     | 1,86 | 1 | 0 | 0 | 2  |
| F1PW10     | Transforming growth factor beta induced OS=Canis lupus familiaris GN=TGFBI PE=4 SV=2 - [F1PW10_CANLF]           | 1,85 | 1 | 0 | 0 | 1  |
| E2R959     | Keratin 4 OS=Canis lupus familiaris GN=LOC608027 PE=3 SV=2 - [E2R959_CANLF]                                     | 1,85 | 1 | 0 | 0 | 2  |
| J9P2W2     | Transforming growth factor beta induced OS=Canis lupus familiaris GN=TGFBI PE=4 SV=1 - [J9P2W2_CANLF]           | 1,83 | 1 | 0 | 0 | 1  |
| E2QT78     | Uncharacterized protein n=1 Tax=Canis lupus familiaris RepID=E2QT78_CANLF                                       | 1,77 | 1 | 1 | 1 | 1  |
| J9P2L4     | HtrA serine peptidase 1 OS=Canis lupus familiaris GN=HTRA1 PE=4 SV=1 - [J9P2L4_CANLF]                           | 1,77 | 1 | 0 | 0 | 59 |
| F1PQ21     | Astrotractin 1 OS=Canis lupus familiaris GN=ASTN1 PE=4 SV=2 - [F1PQ21_CANLF]                                    | 1,77 | 1 | 1 | 1 | 1  |
| A0A0U2DH70 | VP2 OS=African horse sickness virus 7 GN=VP2 PE=4 SV=1 - [A0A0U2DH70_AHSV7]                                     | 1,77 | 1 | 1 | 1 | 1  |
| F1PB04     | PDZ domain containing 7 OS=Canis lupus familiaris GN=PDZD7 PE=4 SV=2 - [F1PB04_CANLF]                           | 1,7  | 1 | 0 | 0 | 5  |
| E2RKK3     | Coiled-coil domain containing 151 OS=Canis lupus familiaris GN=CCDC151 PE=4 SV=2 - [E2RKK3_CANLF]               | 1,68 | 1 | 1 | 1 | 2  |
| A0A0E3ZQT8 | Sulfate transporter OS=Pasteurella multocida subsp. multocida OH4807 GN=I926_08670 PE=3 SV=1 - [A0A0E3ZQT8]     | 1,63 | 1 | 1 | 1 | 1  |
| E2RSZ2     | Hedgehog acyltransferase OS=Canis lupus familiaris GN=HHAT PE=3 SV=2 - [E2RSZ2_CANLF]                           | 1,62 | 1 | 0 | 0 | 1  |
| A0MJA4     | Niemann-Pick C1-like 1 protein OS=Canis lupus familiaris GN=NPC1L1 PE=2 SV=1 - [A0MJA4_CANLF]                   | 1,58 | 1 | 0 | 0 | 1  |
| A0A0K2CW84 | Capsid protein OS=African horse sickness virus 2 GN=VP2 PE=4 SV=1 - [A0A0K2CW84_AHSV2]                          | 1,52 | 1 | 0 | 0 | 1  |
| A0A189RM16 | Major outer capsid protein OS=African horse sickness virus 2 GN=VP2 PE=4 SV=1 - [A0A189RM16_AHSV2]              | 1,52 | 1 | 0 | 0 | 1  |
| A0A0N9LU47 | Capsid protein OS=African horse sickness virus 2 GN=VP2 PE=4 SV=1 - [A0A0N9LU47_AHSV2]                          | 1,52 | 1 | 0 | 0 | 1  |
| A0A189RMM8 | Major outer capsid protein OS=African horse sickness virus 2 GN=VP2 PE=4 SV=1 - [A0A189RMM8_AHSV2]              | 1,52 | 1 | 0 | 0 | 1  |
| A0A0U2DHN5 | VP2 OS=African horse sickness virus 2 GN=VP2 PE=4 SV=1 - [A0A0U2DHN5_AHSV2]                                     | 1,52 | 1 | 0 | 0 | 1  |
| A0A189RMK9 | Major outer capsid protein OS=African horse sickness virus 2 GN=VP2 PE=4 SV=1 - [A0A189RMK9_AHSV2]              | 1,52 | 1 | 0 | 0 | 1  |
| A0A0U1XQZ7 | Outer capsid protein OS=African horse sickness virus 2 GN=VP2 PE=4 SV=1 - [A0A0U1XQZ7_AHSV2]                    | 1,52 | 1 | 0 | 0 | 1  |
| A0A189RMN7 | Major outer capsid protein OS=African horse sickness virus 2 GN=VP2 PE=4 SV=1 - [A0A189RMN7_AHSV2]              | 1,52 | 1 | 0 | 0 | 1  |
| F1PYT6     | Diacylglycerol kinase OS=Canis lupus familiaris GN=DGKK PE=3 SV=2 - [F1PYT6_CANLF]                              | 1,51 | 1 | 0 | 0 | 1  |
| F1PMS2     | Serine/threonine-protein phosphatase 2A 56 kDa regulatory subunit OS=Canis lupus familiaris GN=PPP2R5A PE       | 1,49 | 1 | 0 | 0 | 1  |
| J9NTU6     | YEATS domain containing 2 OS=Canis lupus familiaris GN=YEATS2 PE=4 SV=1 - [J9NTU6_CANLF]                        | 1,35 | 1 | 0 | 0 | 1  |
| F6UZ61     | YEATS domain containing 2 OS=Canis lupus familiaris GN=YEATS2 PE=4 SV=1 - [F6UZ61_CANLF]                        | 1,34 | 1 | 0 | 0 | 1  |
| E2RQR3     | Leucyl-tRNA synthetase 2, mitochondrial OS=Canis lupus familiaris GN=LARS2 PE=3 SV=1 - [E2RQR3_CANLF]           | 1,33 | 1 | 1 | 1 | 1  |
| F1PDT5     | Centelin OS=Canis lupus familiaris GN=CNTLN PE=4 SV=2 - [F1PDT5_CANLF]                                          | 1,29 | 1 | 0 | 0 | 1  |
| E2RQU1     | Ankyrin repeat domain 26 OS=Canis lupus familiaris GN=ANKRD26 PE=4 SV=2 - [E2RQU1_CANLF]                        | 1,27 | 1 | 1 | 1 | 1  |
| F6URD2     | Serine/threonine kinase 3 OS=Canis lupus familiaris GN=STK3 PE=4 SV=1 - [F6URD2_CANLF]                          | 1,22 | 1 | 0 | 0 | 1  |
| E2RS10     | Eukaryotic translation initiation factor 2 alpha kinase 4 OS=Canis lupus familiaris GN=EIF2AK4 PE=4 SV=1 - [E2R | 1,21 | 1 | 1 | 1 | 1  |
| E2REE8     | Amine oxidase OS=Canis lupus familiaris GN=AOC2 PE=3 SV=1 - [E2REE8_CANLF]                                      | 1,19 | 1 | 0 | 0 | 2  |
| Q8MJU5     | Alpha-fetoprotein OS=Canis lupus familiaris GN=AFP PE=2 SV=1 - [FETA_CANLF]                                     | 1,15 | 1 | 0 | 0 | 8  |
| F1PXN2     | Alpha-fetoprotein OS=Canis lupus familiaris GN=AFP PE=3 SV=1 - [F1PXN2_CANLF]                                   | 1,15 | 1 | 0 | 0 | 8  |
| F1Q4B9     | Centelin OS=Canis lupus familiaris GN=CNTLN PE=4 SV=2 - [F1Q4B9_CANLF]                                          | 1,14 | 1 | 0 | 0 | 1  |
| F1P9F6     | Uncharacterized protein n=1 Tax=Canis lupus familiaris RepID=F1P9F6_CANLF                                       | 1,13 | 1 | 1 | 1 | 1  |
| F1Q414     | Lysine demethylase 5A OS=Canis lupus familiaris GN=KDM5A PE=4 SV=2 - [F1Q414_CANLF]                             | 1,13 | 1 | 1 | 1 | 1  |
| E2RQA6     | Bardet-Biedl syndrome 7 protein homolog n=1 Tax=Canis lupus familiaris RepID=E2RQA6_CANLF                       | 1,12 | 1 | 1 | 1 | 1  |
| F1PM26     | CD109 molecule OS=Canis lupus familiaris GN=CD109 PE=4 SV=2 - [F1PM26_CANLF]                                    | 1,11 | 1 | 1 | 1 | 1  |
| E2RKW5     | Nuclear receptor corepressor 1 OS=Canis lupus familiaris GN=NCOR1 PE=4 SV=2 - [E2RKW5_CANLF]                    | 1,1  | 1 | 1 | 1 | 1  |
| F1PRL9     | Transient receptor potential cation channel subfamily M member 1 OS=Canis lupus familiaris GN=TRPM1 PE=4        | 1,09 | 1 | 0 | 0 | 2  |
| E2RI36     | Nuclear transcription factor, X-box binding 1 OS=Canis lupus familiaris GN=NFX1 PE=4 SV=2 - [E2RI36_CANLF]      | 1,07 | 1 | 1 | 1 | 1  |
| F6V049     | Alpha-mannosidase OS=Canis lupus familiaris GN=MAN2A2 PE=3 SV=1 - [F6V049_CANLF]                                | 1,04 | 1 | 0 | 0 | 18 |
| J9NRR7     | GRAM domain containing 1A OS=Canis lupus familiaris GN=GRAMD1A PE=4 SV=1 - [J9NRR7_CANLF]                       | 1,03 | 1 | 0 | 0 | 1  |
| E2RSC3     | Chromosome 16 open reading frame 58 OS=Canis lupus familiaris GN=C16orf58 PE=4 SV=2 - [E2RSC3_CANLF]            | 1,02 | 1 | 0 | 0 | 1  |
| F1PD61     | Uncharacterized protein n=1 Tax=Canis lupus familiaris RepID=F1PD61_CANLF                                       | 1,02 | 1 | 0 | 0 | 1  |
| J9P435     | Uncharacterized protein n=1 Tax=Canis lupus familiaris RepID=J9P435_CANLF                                       | 1,02 | 1 | 0 | 0 | 1  |
| F1PJ75     | PCF11 cleavage and polyadenylation factor subunit OS=Canis lupus familiaris GN=PCF11 PE=4 SV=2 - [F1PJ75_C      | 0,99 | 1 | 1 | 1 | 1  |
| F1Q410     | Microtubule associated serine/threonine kinase family member 4 OS=Canis lupus familiaris GN=MAST4 PE=4 S        | 0,94 | 1 | 1 | 1 | 1  |
| E2RNZ8     | Tudor domain containing 9 OS=Canis lupus familiaris GN=TDRD9 PE=4 SV=2 - [E2RNZ8_CANLF]                         | 0,9  | 1 | 0 | 0 | 3  |
| E2QV80     | ADP ribosylation factor guanine nucleotide exchange factor 2 OS=Canis lupus familiaris GN=ARFGEF2 PE=4 SV=      | 0,9  | 1 | 1 | 1 | 1  |
| E2RNZ9     | Tudor domain containing 9 OS=Canis lupus familiaris GN=TDRD9 PE=4 SV=2 - [E2RNZ9_CANLF]                         | 0,89 | 1 | 0 | 0 | 3  |
| J9P8U1     | Tudor domain containing 9 OS=Canis lupus familiaris GN=TDRD9 PE=4 SV=1 - [J9P8U1_CANLF]                         | 0,89 | 1 | 0 | 0 | 3  |
| E2RJ91     | BTB domain containing 7 OS=Canis lupus familiaris GN=BTBD7 PE=4 SV=1 - [E2RJ91_CANLF]                           | 0,89 | 1 | 1 | 1 | 3  |
| E2REY7     | GRAM domain containing 1A OS=Canis lupus familiaris GN=GRAMD1A PE=4 SV=2 - [E2REY7_CANLF]                       | 0,87 | 1 | 0 | 0 | 1  |
| F1PUE8     | Centrosomal protein 85 like OS=Canis lupus familiaris GN=CEP85L PE=4 SV=2 - [F1PUE8_CANLF]                      | 0,85 | 1 | 0 | 0 | 1  |
| F1PAK4     | Transmembrane 9 superfamily member OS=Canis lupus familiaris PE=3 SV=2 - [F1PAK4_CANLF]                         | 0,85 | 1 | 0 | 0 | 4  |
| E2RTG6     | Ras protein specific guanine nucleotide releasing factor 2 OS=Canis lupus familiaris GN=RASGRF2 PE=4 SV=2 - [   | 0,85 | 1 | 0 | 0 | 1  |
| J9NYT7     | Ras protein specific guanine nucleotide releasing factor 2 OS=Canis lupus familiaris GN=RASGRF2 PE=4 SV=1 - [   | 0,83 | 1 | 0 | 0 | 1  |
| E2RR68     | Family with sequence similarity 129 member B OS=Canis lupus familiaris GN=FAM129B PE=4 SV=1 - [E2RR68_C         | 0,81 | 1 | 0 | 0 | 4  |
| J9NU18     | Ras protein specific guanine nucleotide releasing factor 2 OS=Canis lupus familiaris GN=RASGRF2 PE=4 SV=1 - [   | 0,81 | 1 | 0 | 0 | 1  |
| J9PAM7     | Ras protein specific guanine nucleotide releasing factor 2 OS=Canis lupus familiaris GN=RASGRF2 PE=4 SV=1 - [   | 0,8  | 1 | 0 | 0 | 1  |
| A0A0N7CYP2 | VP1 OS=African horse sickness virus 4 GN=VP1 PE=4 SV=1 - [A0A0N7CYP2_AHSV4]                                     | 0,77 | 1 | 0 | 0 | 1  |
| A0A189RN00 | RNA-dependent RNA polymerase OS=African horse sickness virus 8 GN=VP1 PE=4 SV=1 - [A0A189RN00_AHSV8]            | 0,77 | 1 | 0 | 0 | 1  |
| F1PKV6     | NLR family pyrin domain containing 14 OS=Canis lupus familiaris GN=NLRP14 PE=4 SV=2 - [F1PKV6_CANLF]            | 0,75 | 1 | 0 | 0 | 1  |
| F1P818     | SART1, U4/U6.U5 tri-snRNP-associated protein 1 OS=Canis lupus familiaris GN=SART1 PE=4 SV=2 - [F1P818_CA        | 0,75 | 1 | 0 | 0 | 1  |
| F1PGI8     | Leucine rich repeat and coiled-coil centrosomal protein 1 OS=Canis lupus familiaris GN=LRRCC1 PE=4 SV=2 - [F1   | 0,68 | 1 | 1 | 1 | 43 |
| E2R754     | PDZ domain containing 7 OS=Canis lupus familiaris GN=PDZD7 PE=4 SV=2 - [E2R754_CANLF]                           | 0,66 | 1 | 0 | 0 | 5  |
| E2RJ74     | NLR family pyrin domain containing 14 OS=Canis lupus familiaris GN=NLRP14 PE=4 SV=1 - [E2RJ74_CANLF]            | 0,64 | 1 | 0 | 0 | 1  |
| F1PXC8     | WWC family member 3 OS=Canis lupus familiaris GN=WWC3 PE=4 SV=2 - [F1PXC8_CANLF]                                | 0,64 | 1 | 0 | 0 | 6  |
| J9P0N3     | Activating transcription factor 7 interacting protein OS=Canis lupus familiaris GN=ATF7IP PE=4 SV=1 - [J9P0N3_  | 0,64 | 1 | 0 | 0 | 1  |
| E2R990     | CCR4-NOT transcription complex subunit 1 OS=Canis lupus familiaris GN=CNOT1 PE=4 SV=2 - [E2R990_CANLF]          | 0,63 | 1 | 0 | 0 | 1  |
| E2REI6     | Activating transcription factor 7 interacting protein OS=Canis lupus familiaris GN=ATF7IP PE=4 SV=2 - [E2REI6_  | 0,63 | 1 | 0 | 0 | 1  |
| H9GWC8     | Tubulin folding cofactor D OS=Canis lupus familiaris GN=TBCE PE=4 SV=1 - [H9GWC8_CANLF]                         | 0,62 | 1 | 1 | 1 | 2  |
| F1P8M0     | F-box protein, helicase, 18 OS=Canis lupus familiaris GN=FBXO18 PE=4 SV=2 - [F1P8M0_CANLF]                      | 0,62 | 1 | 0 | 0 | 1  |
| F1PLK8     | Programmed cell death 11 OS=Canis lupus familiaris GN=PCDD11 PE=4 SV=2 - [F1PLK8_CANLF]                         | 0,59 | 1 | 1 | 1 | 1  |
| A0A091DVX3 | Alpha-mannosidase 2x n=102 Tax=Theria RepID=A0A091DVX3_FUKDA                                                    | 0,56 | 1 | 0 | 0 | 2  |
| E2QXZ2     | Squamous cell carcinoma antigen recognized by T-cells 3 OS=Canis lupus familiaris GN=SART3 PE=4 SV=2 - [E2C     | 0,55 | 1 | 0 | 0 | 1  |
| E2RK31     | Centrosomal protein 152 OS=Canis lupus familiaris GN=CEP152 PE=4 SV=2 - [E2RK31_CANLF]                          | 0,54 | 1 | 0 | 0 | 28 |
| J9IHU7     | Centromere protein E OS=Canis lupus familiaris GN=CENPE PE=3 SV=1 - [J9IHU7_CANLF]                              | 0,53 | 1 | 0 | 0 | 38 |
| J9NTC4     | Centrosomal protein 152 OS=Canis lupus familiaris GN=CEP152 PE=4 SV=1 - [J9NTC4_CANLF]                          | 0,52 | 1 | 0 | 0 | 28 |
| J9P002     | Centrosomal protein 152 OS=Canis lupus familiaris GN=CEP152 PE=4 SV=1 - [J9P002_CANLF]                          | 0,51 | 1 | 0 | 0 | 28 |
| F1PWF3     | Zinc finger CCHC-type containing 6 OS=Canis lupus familiaris GN=ZC3H6 PE=4 SV=2 - [F1PWF3_CANLF]                | 0,51 | 1 | 0 | 0 | 1  |

|            |                                                                                                                 |       |   |   |   |    |
|------------|-----------------------------------------------------------------------------------------------------------------|-------|---|---|---|----|
| F1PUS9     | Dystonin OS=Canis lupus familiaris GN=DST PE=4 SV=2 - [F1PUS9_CANLF]                                            | 0,41  | 1 | 0 | 1 | 1  |
| F6UMS1     | Suppressor of glucose, autophagy associated 1 OS=Canis lupus familiaris GN=SOGA1 PE=4 SV=1 - [F6UMS1_CA]        | 0,41  | 1 | 0 | 1 | 1  |
| F1Q188     | Kinesin family member 21B OS=Canis lupus familiaris GN=KIF21B PE=3 SV=2 - [F1Q188_CANLF]                        | 0,37  | 1 | 0 | 1 | 1  |
| J9P991     | Kinesin family member 21B OS=Canis lupus familiaris GN=KIF21B PE=3 SV=1 - [J9P991_CANLF]                        | 0,37  | 1 | 0 | 1 | 1  |
| E2RPN3     | Citron rho-interacting serine/threonine kinase OS=Canis lupus familiaris GN=CIT PE=3 SV=2 - [E2RPN3_CANLF]      | 0,34  | 1 | 0 | 1 | 38 |
| J9P1U4     | Nuclear mitotic apparatus protein 1 OS=Canis lupus familiaris GN=NUMA1 PE=4 SV=1 - [J9P1U4_CANLF]               | 0,33  | 1 | 0 | 1 | 1  |
| E2R099     | Upstream transcription factor family member 3 OS=Canis lupus familiaris GN=USF3 PE=4 SV=1 - [E2R099_CANL]       | 0,31  | 1 | 0 | 1 | 1  |
| E2RSY7     | Nuclear mitotic apparatus protein 1 OS=Canis lupus familiaris GN=NUMA1 PE=4 SV=2 - [E2RSY7_CANLF]               | 0,29  | 1 | 0 | 1 | 1  |
| J9P0W8     | Dystonin OS=Canis lupus familiaris GN=DST PE=4 SV=1 - [J9P0W8_CANLF]                                            | 0,27  | 1 | 0 | 1 | 1  |
| F1PV45     | Titin OS=Canis lupus familiaris GN=TTN PE=4 SV=2 - [F1PV45_CANLF]                                               | 0,03  | 1 | 1 | 1 | 2  |
| P32750     | Cholinesterase (Fragment) OS=Canis lupus familiaris GN=BCHE PE=2 SV=1 - [CHLE_CANLF]                            | 23,4  | 1 | 0 | 1 | 1  |
| E2RI73     | RNA polymerase I subunit D OS=Canis lupus familiaris GN=POLR1D PE=4 SV=1 - [E2RI73_CANLF]                       | 18,05 | 1 | 1 | 1 | 1  |
| Q9TS44     | Cholecystokinins OS=Canis lupus familiaris GN=CCK PE=1 SV=1 - [CCKN_CANLF]                                      | 17,24 | 1 | 0 | 1 | 1  |
| F1PAE2     | ATP synthase subunit d, mitochondrial OS=Canis lupus familiaris PE=3 SV=2 - [F1PAE2_CANLF]                      | 16,67 | 1 | 1 | 1 | 1  |
| J9JHX3     | Uncharacterized protein OS=Canis lupus familiaris PE=4 SV=1 - [J9JHX3_CANLF]                                    | 16,35 | 1 | 1 | 1 | 2  |
| E2QXV4     | IZUMO family member 4 OS=Canis lupus familiaris GN=IZUMO4 PE=4 SV=2 - [E2QXV4_CANLF]                            | 16,06 | 1 | 1 | 1 | 1  |
| F6XC80     | Stathmin OS=Canis lupus familiaris GN=STMN2 PE=3 SV=1 - [F6XC80_CANLF]                                          | 13,97 | 1 | 1 | 1 | 1  |
| E2RQ33     | Transmembrane protein 89 OS=Canis lupus familiaris GN=TMEM89 PE=4 SV=1 - [E2RQ33_CANLF]                         | 11,95 | 1 | 0 | 1 | 3  |
| A0A0E3ZQE7 | Uncharacterized protein OS=Pasteurella multocida subsp. multocida OH4807 GN=1926_01685 PE=4 SV=1 - [A0A0E3ZQE7] | 11,89 | 1 | 1 | 1 | 1  |
| F1PGG1     | Polycomb group ring finger 3 OS=Canis lupus familiaris GN=PCGF3 PE=4 SV=2 - [F1PGG1_CANLF]                      | 9,09  | 1 | 1 | 1 | 1  |
| E2RDW8     | Single-pass membrane protein with coiled-coil domains 3 OS=Canis lupus familiaris GN=SMCO3 PE=4 SV=2 - [E2RDW8] | 8,89  | 1 | 1 | 1 | 1  |
| G1K283     | Cholecystokinins OS=Canis lupus familiaris GN=CCK PE=3 SV=2 - [G1K283_CANLF]                                    | 8,77  | 1 | 0 | 1 | 1  |
| E2QXZ5     | Ankyrin repeat and SOCS box containing 12 OS=Canis lupus familiaris GN=ASB12 PE=4 SV=1 - [E2QXZ5_CANLF]         | 8,46  | 1 | 1 | 1 | 1  |
| J9JHH2     | Uncharacterized protein OS=Canis lupus familiaris PE=4 SV=1 - [J9JHH2_CANLF]                                    | 8,33  | 1 | 0 | 1 | 1  |
| F1PYW6     | Uncharacterized protein OS=Canis lupus familiaris PE=3 SV=1 - [F1PYW6_CANLF]                                    | 8,15  | 1 | 1 | 1 | 1  |
| U6C2S1     | Prekallikrein OS=Canis lupus familiaris GN=PK PE=2 SV=2 - [U6C2S1_CANLF]                                        | 7,94  | 1 | 0 | 1 | 1  |
| E2RAT7     | Sulfotransferase OS=Canis lupus familiaris GN=CHST1 PE=3 SV=1 - [E2RAT7_CANLF]                                  | 7,54  | 1 | 0 | 1 | 1  |
| E9ABV3     | Sulfotransferase (Fragment) OS=Canis lupus familiaris GN=sulfo1 PE=2 SV=1 - [E9ABV3_CANLF]                      | 7,54  | 1 | 0 | 1 | 1  |
| J9P6C1     | Uncharacterized protein OS=Canis lupus familiaris GN=LOC477516 PE=4 SV=1 - [J9P6C1_CANLF]                       | 7,36  | 1 | 1 | 1 | 1  |
| J9NRX7     | Docking protein 4 OS=Canis lupus familiaris GN=DOK4 PE=4 SV=1 - [J9NRX7_CANLF]                                  | 7,36  | 1 | 1 | 1 | 1  |
| E2RBF4     | THUMP domain containing 1 OS=Canis lupus familiaris GN=THUMP1 PE=4 SV=2 - [E2RBF4_CANLF]                        | 7,26  | 1 | 1 | 1 | 1  |
| J9P9J8     | Uncharacterized protein OS=Canis lupus familiaris PE=3 SV=1 - [J9P9J8_CANLF]                                    | 6,94  | 1 | 0 | 1 | 1  |
| J9P756     | Uncharacterized protein OS=Canis lupus familiaris PE=3 SV=1 - [J9P756_CANLF]                                    | 6,71  | 1 | 0 | 1 | 1  |
| E2QXN3     | Uncharacterized protein OS=Canis lupus familiaris PE=3 SV=2 - [E2QXN3_CANLF]                                    | 6,62  | 1 | 0 | 1 | 1  |
| L7N0H6     | Uncharacterized protein OS=Canis lupus familiaris PE=3 SV=1 - [L7N0H6_CANLF]                                    | 6,49  | 1 | 0 | 1 | 1  |
| J9NZS5     | Uncharacterized protein OS=Canis lupus familiaris PE=3 SV=1 - [J9NZS5_CANLF]                                    | 6,45  | 1 | 0 | 1 | 1  |
| J9P608     | Uncharacterized protein OS=Canis lupus familiaris PE=3 SV=1 - [J9P608_CANLF]                                    | 6,45  | 1 | 0 | 1 | 1  |
| J9P9Q1     | Uncharacterized protein OS=Canis lupus familiaris PE=3 SV=1 - [J9P9Q1_CANLF]                                    | 6,45  | 1 | 0 | 1 | 1  |
| E2QZG2     | Ribosomal protein L23a OS=Canis lupus familiaris GN=RPL23A PE=3 SV=1 - [E2QZG2_CANLF]                           | 6,41  | 1 | 0 | 1 | 1  |
| J9NZX1     | Uncharacterized protein OS=Canis lupus familiaris PE=3 SV=1 - [J9NZX1_CANLF]                                    | 6,41  | 1 | 0 | 1 | 1  |
| J9P168     | Uncharacterized protein OS=Canis lupus familiaris PE=3 SV=1 - [J9P168_CANLF]                                    | 6,41  | 1 | 0 | 1 | 1  |
| J9P114     | Uncharacterized protein OS=Canis lupus familiaris PE=3 SV=1 - [J9P114_CANLF]                                    | 6,41  | 1 | 0 | 1 | 1  |
| J9PAG2     | Uncharacterized protein OS=Canis lupus familiaris PE=3 SV=1 - [J9PAG2_CANLF]                                    | 6,41  | 1 | 0 | 1 | 1  |
| J9P016     | Uncharacterized protein OS=Canis lupus familiaris PE=3 SV=1 - [J9P016_CANLF]                                    | 6,37  | 1 | 0 | 1 | 1  |
| J9P690     | Uncharacterized protein OS=Canis lupus familiaris PE=4 SV=1 - [J9P690_CANLF]                                    | 6,37  | 1 | 1 | 1 | 1  |
| A0A0E3V3J9 | Uncharacterized protein OS=Pasteurella multocida subsp. multocida OH4807 GN=1926_01870 PE=4 SV=1 - [A0A0E3V3J9] | 6,23  | 1 | 1 | 1 | 1  |
| E2QYE5     | Cilia and flagella associated protein 36 OS=Canis lupus familiaris GN=CFAP36 PE=4 SV=2 - [E2QYE5_CANLF]         | 5,8   | 1 | 1 | 1 | 1  |
| F1PV43     | Capping actin protein of muscle Z-line alpha subunit 3 OS=Canis lupus familiaris GN=CAPZA3 PE=3 SV=2 - [F1PV43] | 5,69  | 1 | 1 | 1 | 1  |
| J9P785     | Myb like, SWIRM and MPN domains 1 OS=Canis lupus familiaris GN=MYSM1 PE=4 SV=1 - [J9P785_CANLF]                 | 5,59  | 1 | 0 | 1 | 1  |
| J9P2L1     | Regulatory factor X associated protein OS=Canis lupus familiaris GN=RFXAP PE=4 SV=1 - [J9P2L1_CANLF]            | 5,58  | 1 | 1 | 1 | 1  |
| J9NWP1     | Uncharacterized protein OS=Canis lupus familiaris PE=4 SV=1 - [J9NWP1_CANLF]                                    | 5,42  | 1 | 1 | 1 | 1  |
| J9P2D6     | Methyl-CpG-binding protein 2 OS=Canis lupus familiaris GN=MECP2 PE=4 SV=1 - [J9P2D6_CANLF]                      | 5,35  | 1 | 1 | 1 | 1  |
| A0A0E3ZQM7 | DctP OS=Pasteurella multocida subsp. multocida OH4807 GN=1926_08940 PE=4 SV=1 - [A0A0E3ZQM7_PASMD]              | 5,29  | 1 | 0 | 1 | 1  |
| E2QX15     | Methyl-CpG-binding protein 2 OS=Canis lupus familiaris GN=MECP2 PE=4 SV=1 - [E2QX15_CANLF]                      | 5,22  | 1 | 0 | 1 | 1  |
| J9P653     | Uncharacterized protein OS=Canis lupus familiaris GN=CATIP PE=4 SV=1 - [J9P653_CANLF]                           | 5,15  | 1 | 1 | 1 | 3  |
| E2RFJ8     | Translational activator of cytochrome c oxidase I OS=Canis lupus familiaris GN=TACO1 PE=4 SV=1 - [E2RFJ8_CA]    | 5,03  | 1 | 1 | 1 | 1  |
| E2QZ36     | Fasciculation and elongation protein zeta 2 OS=Canis lupus familiaris GN=FEZZ2 PE=4 SV=1 - [E2QZ36_CANLF]       | 4,58  | 1 | 0 | 1 | 2  |
| E2RE57     | Ectonucleoside triphosphate diphosphohydrolase 3 OS=Canis lupus familiaris GN=ENTPD3 PE=3 SV=1 - [E2RE57]       | 4,54  | 1 | 1 | 1 | 1  |
| F1PDG2     | Uncharacterized protein OS=Canis lupus familiaris GN=LOC607286 PE=4 SV=2 - [F1PDG2_CANLF]                       | 4,44  | 1 | 0 | 1 | 1  |
| Q8HY39     | Prenylated Rab acceptor protein 1 OS=Canis lupus familiaris GN=RABAC1 PE=2 SV=1 - [PRAF1_CANLF]                 | 4,32  | 1 | 0 | 1 | 4  |
| F1P766     | PRA1 family protein OS=Canis lupus familiaris GN=RABAC1 PE=3 SV=1 - [F1P766_CANLF]                              | 4,32  | 1 | 0 | 1 | 4  |
| E2QZ38     | Fasciculation and elongation protein zeta 2 OS=Canis lupus familiaris GN=FEZZ2 PE=4 SV=1 - [E2QZ38_CANLF]       | 4,26  | 1 | 0 | 1 | 2  |
| F1PIF2     | Cathepsin Z OS=Canis lupus familiaris GN=CTSZ PE=3 SV=2 - [F1PIF2_CANLF]                                        | 4,21  | 1 | 1 | 1 | 2  |
| J9NU80     | Uncharacterized protein OS=Canis lupus familiaris GN=LOC102156332 PE=4 SV=1 - [J9NU80_CANLF]                    | 4,11  | 1 | 0 | 1 | 1  |
| E2R926     | Fukutin OS=Canis lupus familiaris GN=FKTN PE=4 SV=1 - [E2R926_CANLF]                                            | 3,9   | 1 | 1 | 1 | 4  |
| E2R550     | Calcyphosine like OS=Canis lupus familiaris GN=CAPSL PE=4 SV=2 - [E2R550_CANLF]                                 | 3,85  | 1 | 1 | 1 | 2  |
| J9P2P7     | Uncharacterized protein OS=Canis lupus familiaris GN=LOC607286 PE=4 SV=1 - [J9P2P7_CANLF]                       | 3,73  | 1 | 0 | 1 | 1  |
| F1Q2W3     | Prune homolog 2 OS=Canis lupus familiaris GN=PRUNE2 PE=4 SV=2 - [F1Q2W3_CANLF]                                  | 3,58  | 1 | 0 | 1 | 1  |
| F1P9J2     | Uncharacterized protein OS=Canis lupus familiaris GN=LOC102156332 PE=4 SV=2 - [F1P9J2_CANLF]                    | 3,51  | 1 | 0 | 1 | 1  |
| F1PG90     | Leucine rich repeat LGI family member 3 OS=Canis lupus familiaris GN=LGI3 PE=4 SV=2 - [F1PG90_CANLF]            | 3,43  | 1 | 1 | 1 | 2  |
| J9P1S6     | Cyclin dependent kinase 1 OS=Canis lupus familiaris GN=CDK1 PE=3 SV=1 - [J9P1S6_CANLF]                          | 3,24  | 1 | 0 | 1 | 1  |
| J9P5Z0     | Myosin-1 OS=Canis lupus familiaris GN=MYH1 PE=4 SV=1 - [J9P5Z0_CANLF]                                           | 3,23  | 1 | 0 | 1 | 2  |
| E2RGJ9     | Cyclin dependent kinase 1 OS=Canis lupus familiaris GN=CDK1 PE=3 SV=1 - [E2RGJ9_CANLF]                          | 3,03  | 1 | 0 | 1 | 1  |
| J9P6T3     | Phospholipid transfer protein OS=Canis lupus familiaris GN=PLTP PE=4 SV=1 - [J9P6T3_CANLF]                      | 3,03  | 1 | 0 | 1 | 1  |
| E2R9P0     | Protein phosphatase 1 regulatory inhibitor subunit 1B OS=Canis lupus familiaris GN=PPP1R1B PE=4 SV=2 - [E2R9P0] | 2,93  | 1 | 1 | 1 | 1  |
| F1P8V0     | Phospholipid transfer protein OS=Canis lupus familiaris GN=PLTP PE=4 SV=2 - [F1P8V0_CANLF]                      | 2,92  | 1 | 0 | 1 | 1  |
| F1PXA5     | Uncharacterized protein OS=Canis lupus familiaris GN=COR10D5P PE=3 SV=2 - [F1PXA5_CANLF]                        | 2,9   | 1 | 0 | 1 | 1  |
| L7N0C7     | Uncharacterized protein OS=Canis lupus familiaris GN=LOC489338 PE=3 SV=1 - [L7N0C7_CANLF]                       | 2,87  | 1 | 0 | 1 | 1  |
| F1PAC5     | Mitogen-activated protein kinase kinase 11 OS=Canis lupus familiaris GN=MAP3K11 PE=4 SV=2 - [F1PAC5]            | 2,86  | 1 | 1 | 1 | 6  |
| J9PB12     | MMS22 like, DNA repair protein OS=Canis lupus familiaris GN=MMS22L PE=4 SV=1 - [J9PB12_CANLF]                   | 2,86  | 1 | 0 | 1 | 2  |
| F1Q321     | Olfactory receptor OS=Canis lupus familiaris GN=LOC100687027 PE=3 SV=2 - [F1Q321_CANLF]                         | 2,83  | 1 | 0 | 1 | 1  |
| F1P9B7     | Nuclear receptor interacting protein 2 OS=Canis lupus familiaris GN=NRIP2 PE=4 SV=2 - [F1P9B7_CANLF]            | 2,78  | 1 | 1 | 1 | 2  |
| I2FJU3     | 55 kDa erythrocyte membrane protein OS=Canis lupus familiaris GN=MPP1 PE=2 SV=1 - [I2FJU3_CANLF]                | 2,76  | 1 | 1 | 1 | 1  |
| E2RCS2     | Regulatory factor X5 OS=Canis lupus familiaris GN=RFX5 PE=4 SV=1 - [E2RCS2_CANLF]                               | 2,75  | 1 | 1 | 1 | 1  |
| J9NUB7     | Regulatory box P3 OS=Canis lupus familiaris GN=FOXP3 PE=4 SV=1 - [J9NUB7_CANLF]                                 | 2,61  | 1 | 0 | 1 | 1  |
| J9P514     | RB associated KRAB zinc finger OS=Canis lupus familiaris GN=RBAK PE=3 SV=1 - [J9P514_CANLF]                     | 2,61  | 1 | 1 | 1 | 2  |
| E2QY95     | DExD-box helicase 39A OS=Canis lupus familiaris GN=DDX39A PE=4 SV=1 - [E2QY95_CANLF]                            | 2,58  | 1 | 1 | 1 | 1  |
| E2QY00     | Potassium voltage-gated channel subfamily B member 1 OS=Canis lupus familiaris GN=KCNB1 PE=3 SV=1 - [E2QY00]    | 2,56  | 1 | 1 | 1 | 1  |
| J9P5K5     | Centromere protein H OS=Canis lupus familiaris GN=CENPH PE=4 SV=1 - [J9P5K5_CANLF]                              | 2,55  | 1 | 0 | 1 | 1  |
| E2R8X4     | Centromere protein H OS=Canis lupus familiaris GN=CENPH PE=4 SV=2 - [E2R8X4_CANLF]                              | 2,51  | 1 | 0 | 1 | 1  |
| Q9TU44     | Platelet glycoprotein IIb OS=Canis lupus familiaris GN=GPIIb PE=2 SV=1 - [Q9TU44_CANLF]                         | 2,51  | 1 | 0 | 1 | 1  |
| Q9TUN8     | Glycoprotein GPIIb OS=Canis lupus familiaris GN=GPIIb PE=2 SV=1 - [Q9TUN8_CANLF]                                | 2,51  | 1 | 0 | 1 | 1  |
| F1PLC7     | Myb like, SWIRM and MPN domains 1 OS=Canis lupus familiaris GN=MYSM1 PE=4 SV=2 - [F1PLC7_CANLF]                 | 2,48  | 1 | 0 | 1 | 1  |

|            |                                                                                                               |      |   |   |   |   |
|------------|---------------------------------------------------------------------------------------------------------------|------|---|---|---|---|
| F1PIE1     | Rab geranylgeranyltransferase alpha subunit OS=Canis lupus familiaris GN=RABGGTA PE=4 SV=2 - [F1PIE1_CAN]     | 2,47 | 1 | 1 | 1 | 1 |
| E2RJP3     | GTP binding protein 8 (putative) OS=Canis lupus familiaris GN=GTPBP8 PE=4 SV=1 - [E2RJP3_CANLF]               | 2,43 | 1 | 1 | 1 | 2 |
| F1PAB7     | Aldehyde dehydrogenase 9 family member A1 OS=Canis lupus familiaris GN=ALDH9A1 PE=3 SV=2 - [F1PAB7_C]         | 2,43 | 1 | 1 | 1 | 1 |
| F1PRU9     | Uncharacterized protein OS=Canis lupus familiaris GN=ITGA2B PE=3 SV=2 - [F1PRU9_CANLF]                        | 2,4  | 1 | 0 | 1 | 1 |
| E2RNS0     | Mitogen-activated protein kinase kinase 13 OS=Canis lupus familiaris GN=MAP3K13 PE=3 SV=2 - [E2RNS]           | 2,38 | 1 | 1 | 1 | 1 |
| F1PJH3     | Collagen type XIII alpha 1 chain OS=Canis lupus familiaris GN=COL13A1 PE=4 SV=2 - [F1PJH3_CANLF]              | 2,35 | 1 | 1 | 1 | 1 |
| F1PF21     | MMS22 like, DNA repair protein OS=Canis lupus familiaris GN=MMS22L PE=4 SV=2 - [F1PF21_CANLF]                 | 2,34 | 1 | 0 | 1 | 2 |
| D0VYJ3     | Forhead box P3 OS=Canis lupus familiaris GN=FOXP3 PE=2 SV=1 - [D0VYJ3_CANLF]                                  | 2,33 | 1 | 0 | 1 | 1 |
| E2RM97     | Potassium channel tetramerization domain containing 4 OS=Canis lupus familiaris GN=KCTD4 PE=4 SV=1 - [E2R]    | 2,32 | 1 | 0 | 1 | 2 |
| P0C569     | Phosphoprotein OS=Mokola virus GN=P PE=1 SV=1 - [PHOSP_MOKV]                                                  | 2,31 | 1 | 0 | 1 | 2 |
| Q91RE1     | Phosphoprotein OS=Mokola virus GN=P PE=3 SV=1 - [Q91RE1_MOKV]                                                 | 2,31 | 1 | 0 | 1 | 2 |
| Q910M0     | Phosphoprotein OS=Mokola virus GN=P PE=3 SV=1 - [Q910M0_MOKV]                                                 | 2,31 | 1 | 0 | 1 | 2 |
| A0A1L2C227 | Phosphoprotein OS=Mokola virus GN=P PE=3 SV=1 - [A0A1L2C227_MOKV]                                             | 2,31 | 1 | 0 | 1 | 2 |
| R9Q7B8     | Phosphoprotein OS=Mokola virus PE=3 SV=1 - [R9Q7B8_MOKV]                                                      | 2,31 | 1 | 0 | 1 | 2 |
| A0A1L2C1Z1 | Phosphoprotein OS=Mokola virus GN=P PE=3 SV=1 - [A0A1L2C1Z1_MOKV]                                             | 2,31 | 1 | 0 | 1 | 2 |
| A0A1L2C1Z5 | Phosphoprotein OS=Mokola virus GN=P PE=3 SV=1 - [A0A1L2C1Z5_MOKV]                                             | 2,31 | 1 | 0 | 1 | 2 |
| S5DMU3     | Phosphoprotein OS=Mokola virus GN=P PE=3 SV=1 - [S5DMU3_MOKV]                                                 | 2,31 | 1 | 0 | 1 | 2 |
| S5DMW2     | Phosphoprotein OS=Mokola virus GN=P PE=3 SV=1 - [S5DMW2_MOKV]                                                 | 2,31 | 1 | 0 | 1 | 2 |
| S4S267     | Phosphoprotein OS=Mokola virus PE=3 SV=1 - [S4S267_MOKV]                                                      | 2,31 | 1 | 0 | 1 | 2 |
| Q91RE0     | Phosphoprotein OS=Mokola virus GN=P PE=3 SV=1 - [Q91RE0_MOKV]                                                 | 2,31 | 1 | 0 | 1 | 2 |
| O56775     | Phosphoprotein OS=Mokola virus GN=P PE=2 SV=1 - [O56775_MOKV]                                                 | 2,31 | 1 | 0 | 1 | 2 |
| R9Q7N9     | Phosphoprotein OS=Mokola virus GN=P PE=3 SV=1 - [R9Q7N9_MOKV]                                                 | 2,31 | 1 | 0 | 1 | 2 |
| U5L226     | Phosphoprotein OS=Mokola virus PE=3 SV=1 - [U5L226_MOKV]                                                      | 2,31 | 1 | 0 | 1 | 2 |
| S4S2C5     | Phosphoprotein OS=Mokola virus GN=P PE=3 SV=1 - [S4S2C5_MOKV]                                                 | 2,31 | 1 | 0 | 1 | 2 |
| O56777     | Phosphoprotein OS=Mokola virus GN=P PE=2 SV=1 - [O56777_MOKV]                                                 | 2,31 | 1 | 0 | 1 | 2 |
| S4S2C0     | Phosphoprotein OS=Mokola virus GN=P PE=3 SV=1 - [S4S2C0_MOKV]                                                 | 2,31 | 1 | 0 | 1 | 2 |
| E2R6C1     | Platelet and endothelial cell adhesion molecule 1 OS=Canis lupus familiaris GN=PECAM1 PE=4 SV=1 - [E2R6C1_    | 2,3  | 1 | 1 | 1 | 1 |
| F1PLU9     | Uncharacterized protein OS=Canis lupus familiaris PE=4 SV=2 - [F1PLU9_CANLF]                                  | 2,26 | 1 | 1 | 1 | 1 |
| F6UV0E     | Protein phosphatase 1 regulatory subunit 18 OS=Canis lupus familiaris GN=PPP1R18 PE=4 SV=1 - [F6UV0E_CAN      | 2,22 | 1 | 1 | 1 | 1 |
| F1PXQ2     | TLR4 interactor with leucine rich repeats OS=Canis lupus familiaris GN=TRIL PE=4 SV=2 - [F1PXQ2_CANLF]        | 2,18 | 1 | 1 | 1 | 1 |
| J9P3F0     | Zinc finger protein 473 OS=Canis lupus familiaris GN=ZNF473 PE=3 SV=1 - [J9P3F0_CANLF]                        | 2,16 | 1 | 1 | 1 | 1 |
| E2RBF2     | Pumilio RNA binding family member 3 OS=Canis lupus familiaris GN=PUM3 PE=4 SV=2 - [E2RBF2_CANLF]              | 2,16 | 1 | 1 | 1 | 1 |
| E2R8E8     | Deltex E3 ubiquitin ligase 2 OS=Canis lupus familiaris GN=DTX2 PE=4 SV=1 - [E2R8E8_CANLF]                     | 2,09 | 1 | 1 | 1 | 1 |
| F1PKA6     | Ectonucleoside triphosphate diphosphohydrolase 4 OS=Canis lupus familiaris GN=ENTPD4 PE=3 SV=2 - [F1PKA6]     | 1,95 | 1 | 1 | 1 | 1 |
| E2RCX4     | Structural maintenance of chromosomes protein OS=Canis lupus familiaris GN=SMC4 PE=3 SV=2 - [E2RCX4_CA        | 1,94 | 1 | 1 | 1 | 1 |
| J9P6J8     | Glucosylceramidase beta 2 OS=Canis lupus familiaris GN=GBA2 PE=4 SV=1 - [J9P6J8_CANLF]                        | 1,94 | 1 | 1 | 1 | 1 |
| Q8G7B7     | Hepatocyte growth factor OS=Canis lupus familiaris GN=HGF PE=2 SV=1 - [HGF_CANLF]                             | 1,92 | 1 | 1 | 1 | 1 |
| E2RHR8     | Uncharacterized protein OS=Canis lupus familiaris GN=LOC100856515 PE=3 SV=1 - [E2RHR8_CANLF]                  | 1,87 | 1 | 1 | 1 | 1 |
| E2RD34     | BCL2 like 14 OS=Canis lupus familiaris GN=BCL2L14 PE=4 SV=1 - [E2RD34_CANLF]                                  | 1,82 | 1 | 0 | 1 | 1 |
| F1PYV6     | Adhesion G protein-coupled receptor A2 OS=Canis lupus familiaris GN=ADGRA2 PE=3 SV=2 - [F1PYV6_CANLF]         | 1,8  | 1 | 0 | 1 | 1 |
| J9NRV9     | Adhesion G protein-coupled receptor A2 OS=Canis lupus familiaris GN=ADGRA2 PE=3 SV=1 - [J9NRV9_CANLF]         | 1,8  | 1 | 0 | 1 | 1 |
| F1Q3I3     | Condensin complex subunit 2 OS=Canis lupus familiaris GN=NCAPH PE=3 SV=2 - [F1Q3I3_CANLF]                     | 1,79 | 1 | 1 | 1 | 1 |
| E2R8W7     | Calcium binding protein 39 OS=Canis lupus familiaris GN=CAB39 PE=4 SV=1 - [E2R8W7_CANLF]                      | 1,76 | 1 | 1 | 1 | 1 |
| E2R8P3     | Signal induced proliferation associated 1 like 3 OS=Canis lupus familiaris GN=SIPA1L3 PE=4 SV=2 - [E2R8P3_CAI | 1,75 | 1 | 1 | 1 | 1 |
| J9P197     | Signal induced proliferation associated 1 like 3 OS=Canis lupus familiaris GN=SIPA1L3 PE=4 SV=1 - [J9P197_CAN | 1,75 | 1 | 1 | 1 | 1 |
| F1PJA7     | Maestro heat like repeat family member 9 OS=Canis lupus familiaris GN=MROH9 PE=4 SV=2 - [F1PJA7_CANLF]        | 1,75 | 1 | 1 | 1 | 1 |
| J9P4S4     | Pre-mRNA processing factor 40 homolog A OS=Canis lupus familiaris GN=PRPF40A PE=4 SV=1 - [J9P4S4_CANLF]       | 1,72 | 1 | 1 | 1 | 1 |
| F6X487     | Wiskott-Aldrich syndrome OS=Canis lupus familiaris GN=WAS PE=4 SV=1 - [F6X487_CANLF]                          | 1,72 | 1 | 1 | 1 | 1 |
| F1PKD4     | Transmembrane protein 67 OS=Canis lupus familiaris GN=TMEM67 PE=4 SV=2 - [F1PKD4_CANLF]                       | 1,72 | 1 | 1 | 1 | 1 |
| F1P666     | Casein kinase 2 alpha 2 OS=Canis lupus familiaris GN=CSNK2A2 PE=3 SV=2 - [F1P666_CANLF]                       | 1,7  | 1 | 0 | 1 | 1 |
| E2RQ78     | RB transcriptional corepressor like 1 OS=Canis lupus familiaris GN=RBL1 PE=4 SV=2 - [E2RQ78_CANLF]            | 1,69 | 1 | 0 | 1 | 2 |
| F1PBK3     | RB transcriptional corepressor like 1 OS=Canis lupus familiaris GN=RBL1 PE=4 SV=2 - [F1PBK3_CANLF]            | 1,69 | 1 | 0 | 1 | 2 |
| E2R5V6     | Pre-mRNA processing factor 40 homolog A OS=Canis lupus familiaris GN=PRPF40A PE=4 SV=2 - [E2R5V6_CANLI        | 1,67 | 1 | 0 | 1 | 1 |
| E2QVP1     | Coiled-coil domain containing 13 OS=Canis lupus familiaris GN=CCDC13 PE=4 SV=2 - [E2QVP1_CANLF]               | 1,64 | 1 | 1 | 1 | 1 |
| J9PB32     | Striatin OS=Canis lupus familiaris GN=STRN PE=4 SV=1 - [J9PB32_CANLF]                                         | 1,63 | 1 | 0 | 1 | 1 |
| F1Q1J3     | Single-pass membrane protein with coiled-coil domains 2 OS=Canis lupus familiaris GN=SMCO2 PE=4 SV=2 - [F1    | 1,63 | 1 | 1 | 1 | 1 |
| E2RGN3     | ERCC excision repair 6 like 2 OS=Canis lupus familiaris GN=ERCC6L2 PE=4 SV=2 - [E2RGN3_CANLF]                 | 1,62 | 1 | 1 | 1 | 1 |
| F1PCM3     | Axin 1 OS=Canis lupus familiaris GN=AXIN1 PE=4 SV=2 - [F1PCM3_CANLF]                                          | 1,61 | 1 | 1 | 1 | 2 |
| F6XFF5     | Cilia and flagella associated protein 58 OS=Canis lupus familiaris GN=CFAP58 PE=4 SV=1 - [F6XFF5_CANLF]       | 1,6  | 1 | 1 | 1 | 1 |
| E2QZU5     | Protein geranylgeranyltransferase type I subunit beta OS=Canis lupus familiaris GN=PGGT1B PE=4 SV=1 - [E2QZ   | 1,59 | 1 | 0 | 1 | 1 |
| F1PBH4     | Fibrous sheath interacting protein 1 OS=Canis lupus familiaris GN=FSIP1 PE=4 SV=2 - [F1PBH4_CANLF]            | 1,59 | 1 | 1 | 1 | 1 |
| F1P610     | Oligophrenin 1 OS=Canis lupus familiaris GN=OPHN1 PE=4 SV=2 - [F1P610_CANLF]                                  | 1,57 | 1 | 1 | 1 | 1 |
| F1P999     | Striatin OS=Canis lupus familiaris GN=STRN PE=4 SV=2 - [F1P999_CANLF]                                         | 1,56 | 1 | 0 | 1 | 1 |
| E2R8X7     | Nuclear receptor binding SET domain protein 3 OS=Canis lupus familiaris GN=NSD3 PE=4 SV=1 - [E2R8X7_CANL      | 1,55 | 1 | 0 | 1 | 1 |
| E2RLT7     | 5-azacytidine induced 2 OS=Canis lupus familiaris GN=AZI2 PE=4 SV=2 - [E2RLT7_CANLF]                          | 1,53 | 1 | 0 | 1 | 1 |
| E2RHZ1     | Casein kinase 2 alpha 3 OS=Canis lupus familiaris GN=CSNK2A3 PE=3 SV=1 - [E2RHZ1_CANLF]                       | 1,53 | 1 | 0 | 1 | 1 |
| J9JHE4     | Tripeptidyl peptidase 2 OS=Canis lupus familiaris GN=TPP2 PE=4 SV=1 - [J9JHE4_CANLF]                          | 1,52 | 1 | 0 | 1 | 1 |
| E2R9J9     | Tripeptidyl peptidase 2 OS=Canis lupus familiaris GN=TPP2 PE=4 SV=2 - [E2R9J9_CANLF]                          | 1,51 | 1 | 0 | 1 | 1 |
| F6X7Y8     | Peptidyl arginine deiminase 1 OS=Canis lupus familiaris GN=PADI1 PE=4 SV=1 - [F6X7Y8_CANLF]                   | 1,51 | 1 | 1 | 1 | 1 |
| J9NSF2     | Uncharacterized protein OS=Canis lupus familiaris PE=4 SV=1 - [J9NSF2_CANLF]                                  | 1,49 | 1 | 0 | 1 | 1 |
| D0FHK7     | KIF1A OS=Canis lupus familiaris PE=2 SV=1 - [D0FHK7_CANLF]                                                    | 1,48 | 1 | 0 | 1 | 1 |
| H9GWG2     | Kinesin family member 1A OS=Canis lupus familiaris GN=KIF1A PE=3 SV=2 - [H9GWG2_CANLF]                        | 1,48 | 1 | 1 | 1 | 1 |
| F1PFD9     | Diacylglycerol kinase OS=Canis lupus familiaris GN=DGKH PE=3 SV=2 - [F1PFD9_CANLF]                            | 1,46 | 1 | 1 | 0 | 1 |
| F1PBD8     | Coiled-coil domain containing 33 OS=Canis lupus familiaris GN=CCDC33 PE=4 SV=2 - [F1PBD8_CANLF]               | 1,45 | 1 | 0 | 1 | 2 |
| Q076A1     | Alpha-cardiac myosin heavy chain (Fragment) OS=Canis lupus familiaris PE=3 SV=1 - [Q076A1_CANLF]              | 1,44 | 1 | 1 | 1 | 1 |
| E2RAF1     | Uncharacterized protein OS=Canis lupus familiaris GN=HYPK PE=3 SV=1 - [E2RAF1_CANLF]                          | 1,44 | 1 | 0 | 1 | 1 |
| J9P8V3     | KIAA0753 OS=Canis lupus familiaris GN=KIAA0753 PE=4 SV=1 - [J9P8V3_CANLF]                                     | 1,44 | 1 | 1 | 1 | 1 |
| E2RQ77     | Creatine kinase, mitochondrial 2 OS=Canis lupus familiaris GN=CKMT2 PE=3 SV=1 - [E2RQ77_CANLF]                | 1,43 | 1 | 0 | 1 | 1 |
| J9NYI2     | Tripartite motif containing 7 OS=Canis lupus familiaris GN=TRIM7 PE=4 SV=1 - [J9NYI2_CANLF]                   | 1,39 | 1 | 0 | 1 | 1 |
| E2RN64     | Kinesin family member 1A OS=Canis lupus familiaris GN=KIF1A PE=3 SV=2 - [E2RN64_CANLF]                        | 1,38 | 1 | 0 | 1 | 1 |
| J9P2U6     | Protein tyrosine phosphatase, receptor type Q OS=Canis lupus familiaris GN=PTRPQ PE=4 SV=1 - [J9P2U6_CAN      | 1,35 | 1 | 0 | 1 | 4 |
| F1PMJ2     | Myosin-1 OS=Canis lupus familiaris GN=MYH1 PE=3 SV=2 - [F1PMJ2_CANLF]                                         | 1,34 | 1 | 0 | 1 | 2 |
| J9PB02     | Ubiquitin carboxyl-terminal hydrolase 11 OS=Canis lupus familiaris GN=USP11 PE=3 SV=1 - [J9PB02_CANLF]        | 1,32 | 1 | 0 | 1 | 1 |
| J9P3M3     | Ubiquitin carboxyl-terminal hydrolase 11 OS=Canis lupus familiaris GN=USP11 PE=3 SV=1 - [J9P3M3_CANLF]        | 1,3  | 1 | 0 | 1 | 1 |
| Q076A6     | Myosin-1 OS=Canis lupus familiaris GN=MYH1 PE=3 SV=2 - [MYH1_CANLF]                                           | 1,29 | 1 | 0 | 1 | 2 |
| Q076A7     | Myosin-2 OS=Canis lupus familiaris GN=MYH2 PE=3 SV=1 - [MYH2_CANLF]                                           | 1,29 | 1 | 0 | 1 | 2 |
| A0A140T8E7 | Myosin-1 OS=Canis lupus familiaris GN=MYH1 PE=3 SV=1 - [A0A140T8E7_CANLF]                                     | 1,28 | 1 | 0 | 1 | 2 |
| J9NZ48     | Uncharacterized protein OS=Canis lupus familiaris GN=HYPK PE=3 SV=1 - [J9NZ48_CANLF]                          | 1,25 | 1 | 0 | 1 | 1 |
| E2R017     | Mitogen-activated protein kinase kinase kinase OS=Canis lupus familiaris GN=MAP4K1 PE=3 SV=2 - [E2R           | 1,22 | 1 | 0 | 1 | 2 |
| E2R041     | Mitogen-activated protein kinase kinase kinase OS=Canis lupus familiaris GN=MAP4K1 PE=3 SV=2 - [E2R           | 1,22 | 1 | 0 | 1 | 2 |
| Q076A0     | Masticatory myosin heavy chain 2M OS=Canis lupus familiaris PE=3 SV=1 - [Q076A0_CANLF]                        | 1,22 | 1 | 0 | 1 | 1 |
| F1PT61     | Myosin-16 OS=Canis lupus familiaris GN=MYH16 PE=3 SV=2 - [MYH16_CANLF]                                        | 1,19 | 1 | 0 | 1 | 1 |
| E2RPV3     | Stereocilin OS=Canis lupus familiaris GN=STRC PE=4 SV=2 - [E2RPV3_CANLF]                                      | 1,18 | 1 | 1 | 1 | 2 |

|            |                                                                                                               |       |   |   |   |    |
|------------|---------------------------------------------------------------------------------------------------------------|-------|---|---|---|----|
| J9P588     | Tripartite motif containing 7 OS=Canis lupus familiaris GN=TRIM7 PE=4 SV=1 - [J9P588_CANLF]                   | 1,17  | 1 | 0 | 1 | 1  |
| H8Y3D0     | NADH-ubiquinone oxidoreductase chain 5 OS=Canis lupus familiaris GN=ND5 PE=3 SV=1 - [H8Y3D0_CANLF]            | 1,16  | 1 | 0 | 1 | 1  |
| J9NUG8     | Coiled-coil domain containing 33 OS=Canis lupus familiaris GN=CDC33 PE=4 SV=1 - [J9NUG8_CANLF]                | 1,16  | 1 | 0 | 1 | 2  |
| F1PDD8     | Protein tyrosine phosphatase, receptor type U OS=Canis lupus familiaris GN=PTRPU PE=4 SV=2 - [F1PDD8_CANLF]   | 1,11  | 1 | 1 | 1 | 1  |
| F1PB17     | Zinc finger DBF-type containing 2 OS=Canis lupus familiaris GN=ZDFB2 PE=4 SV=2 - [F1PB17_CANLF]               | 1,11  | 1 | 0 | 1 | 1  |
| J9NS68     | Zinc finger DBF-type containing 2 OS=Canis lupus familiaris GN=ZDFB2 PE=4 SV=1 - [J9NS68_CANLF]               | 1,11  | 1 | 0 | 1 | 1  |
| F1PWM6     | Ubiquitin carboxyl-terminal hydrolase 11 OS=Canis lupus familiaris GN=USP11 PE=3 SV=2 - [F1PWM6_CANLF]        | 1,05  | 1 | 0 | 1 | 1  |
| J9P7B0     | Zinc finger DBF-type containing 2 OS=Canis lupus familiaris GN=ZDFB2 PE=4 SV=1 - [J9P7B0_CANLF]               | 1,03  | 1 | 0 | 1 | 1  |
| E2QX18     | Tyrosine-protein phosphatase non-receptor type OS=Canis lupus familiaris GN=PTPN3 PE=3 SV=1 - [E2QX18_CANLF]  | 0,99  | 1 | 1 | 1 | 1  |
| F1PR64     | UHRF1 binding protein 1 like OS=Canis lupus familiaris GN=UHRF1BP1 PE=4 SV=2 - [F1PR64_CANLF]                 | 0,96  | 1 | 1 | 1 | 1  |
| E2RD11     | Uncharacterized protein OS=Canis lupus familiaris PE=4 SV=2 - [E2RD11_CANLF]                                  | 0,96  | 1 | 0 | 1 | 1  |
| E2QUY9     | Uncharacterized protein OS=Canis lupus familiaris GN=ADAMTS13 PE=4 SV=2 - [E2QUY9_CANLF]                      | 0,93  | 1 | 0 | 1 | 1  |
| F71124     | A disintegrin and metalloproteinase with thrombospondin motifs 13 OS=Canis lupus familiaris GN=ADAMTS13       | 0,93  | 1 | 0 | 1 | 1  |
| E2QY9      | MKL1/myocardin like 2 OS=Canis lupus familiaris GN=MKL2 PE=4 SV=1 - [E2QY9_CANLF]                             | 0,93  | 1 | 0 | 1 | 1  |
| F1PPD2     | Striatin 4 OS=Canis lupus familiaris GN=STRN4 PE=4 SV=2 - [F1PPD2_CANLF]                                      | 0,92  | 1 | 1 | 1 | 1  |
| J9NSB2     | MKL1/myocardin like 2 OS=Canis lupus familiaris GN=MKL2 PE=4 SV=1 - [J9NSB2_CANLF]                            | 0,92  | 1 | 0 | 1 | 1  |
| E2RI01     | Solute carrier family 7 member 2 OS=Canis lupus familiaris GN=SLC7A2 PE=4 SV=1 - [E2RI01_CANLF]               | 0,91  | 1 | 0 | 1 | 2  |
| F1Q332     | Glycyl-tRNA synthetase OS=Canis lupus familiaris GN=GARS PE=4 SV=2 - [F1Q332_CANLF]                           | 0,88  | 1 | 1 | 1 | 1  |
| F1PT14     | Calcium-activated potassium channel subunit alpha-1 OS=Canis lupus familiaris GN=KCNMA1 PE=4 SV=1 - [F1P      | 0,87  | 1 | 0 | 1 | 2  |
| J9P0G6     | Calcium-activated potassium channel subunit alpha-1 OS=Canis lupus familiaris GN=KCNMA1 PE=3 SV=1 - [J9P      | 0,86  | 1 | 0 | 1 | 2  |
| E2QWE6     | Protein tyrosine phosphatase, receptor type Q OS=Canis lupus familiaris GN=PTRPQ PE=4 SV=2 - [E2QWE6_CANLF]   | 0,86  | 1 | 0 | 1 | 4  |
| E2REZ1     | Coiled-coil domain containing 40 OS=Canis lupus familiaris GN=CDC40 PE=4 SV=2 - [E2REZ1_CANLF]                | 0,83  | 1 | 1 | 1 | 1  |
| F1PT15     | Calcium-activated potassium channel subunit alpha-1 OS=Canis lupus familiaris GN=KCNMA1 PE=3 SV=2 - [F1P      | 0,82  | 1 | 0 | 1 | 2  |
| E2RPG7     | Uncharacterized protein OS=Canis lupus familiaris PE=4 SV=1 - [E2RPG7_CANLF]                                  | 0,82  | 1 | 0 | 1 | 1  |
| F1PLO4     | ATP/GTP binding protein 1 OS=Canis lupus familiaris GN=AGTPBP1 PE=4 SV=2 - [F1PLO4_CANLF]                     | 0,8   | 1 | 0 | 1 | 1  |
| E2RHS2     | Zinc finger and BTB domain containing 49 OS=Canis lupus familiaris GN=ZBTB49 PE=4 SV=2 - [E2RHS2_CANLF]       | 0,78  | 1 | 1 | 1 | 1  |
| E2R8N3     | Uncharacterized protein OS=Canis lupus familiaris PE=4 SV=2 - [E2R8N3_CANLF]                                  | 0,75  | 1 | 1 | 1 | 1  |
| F1PAP3     | Pericentrin OS=Canis lupus familiaris GN=PCNT PE=4 SV=2 - [F1PAP3_CANLF]                                      | 0,74  | 1 | 1 | 1 | 1  |
| F6UMQ8     | Ubiquitin carboxyl-terminal hydrolase 16 OS=Canis lupus familiaris GN=USP16 PE=3 SV=1 - [F6UMQ8_CANLF]        | 0,73  | 1 | 1 | 1 | 1  |
| J9NSE2     | ATP/GTP binding protein 1 OS=Canis lupus familiaris GN=AGTPBP1 PE=4 SV=1 - [J9NSE2_CANLF]                     | 0,73  | 1 | 0 | 1 | 1  |
| Q258K2     | Myosin-9 OS=Canis lupus familiaris GN=MYH9 PE=2 SV=1 - [MYH9_CANLF]                                           | 0,71  | 1 | 0 | 1 | 2  |
| F1P9J3     | Myosin-9 OS=Canis lupus familiaris GN=MYH9 PE=3 SV=2 - [F1P9J3_CANLF]                                         | 0,71  | 1 | 0 | 1 | 2  |
| E2QUJ0     | Histone-lysine N-methyltransferase OS=Canis lupus familiaris GN=NSD3 PE=4 SV=1 - [E2QUJ0_CANLF]               | 0,7   | 1 | 0 | 1 | 1  |
| J9NVX7     | Histone-lysine N-methyltransferase OS=Canis lupus familiaris GN=NSD1 PE=4 SV=1 - [J9NVX7_CANLF]               | 0,7   | 1 | 0 | 1 | 1  |
| F1Q0K3     | Microtubule associated monoxygenase, calponin and LIM domain containing 3 OS=Canis lupus familiaris GN=       | 0,64  | 1 | 1 | 1 | 1  |
| E2R3Q9     | Histone-lysine N-methyltransferase OS=Canis lupus familiaris GN=NSD1 PE=4 SV=2 - [E2R3Q9_CANLF]               | 0,63  | 1 | 0 | 1 | 1  |
| J9P0B4     | Tudor domain containing 15 OS=Canis lupus familiaris GN=TDRD15 PE=4 SV=1 - [J9P0B4_CANLF]                     | 0,61  | 1 | 1 | 1 | 1  |
| F6XMT1     | Ankyrin repeat domain 35 OS=Canis lupus familiaris GN=ANKRD35 PE=4 SV=1 - [F6XMT1_CANLF]                      | 0,6   | 1 | 0 | 1 | 1  |
| F1PPE5     | Biorientation of chromosomes in cell division 1 like 1 OS=Canis lupus familiaris GN=BOD1L1 PE=4 SV=2 - [F1PPE | 0,59  | 1 | 0 | 1 | 1  |
| E2RFL4     | Integrator complex subunit 3 OS=Canis lupus familiaris GN=INTS3 PE=4 SV=2 - [E2RFL4_CANLF]                    | 0,57  | 1 | 0 | 1 | 6  |
| E2RDY9     | Biorientation of chromosomes in cell division 1 like 1 OS=Canis lupus familiaris GN=BOD1L1 PE=4 SV=2 - [E2RD  | 0,56  | 1 | 0 | 1 | 1  |
| E2RB62     | Myosin IB OS=Canis lupus familiaris GN=MYO1B PE=3 SV=2 - [E2RB62_CANLF]                                       | 0,53  | 1 | 0 | 1 | 1  |
| J9P0X3     | Adenylate kinase 9 OS=Canis lupus familiaris GN=AK9 PE=4 SV=1 - [J9P0X3_CANLF]                                | 0,53  | 1 | 0 | 1 | 1  |
| E2RT62     | Adenylate kinase 9 OS=Canis lupus familiaris GN=AK9 PE=4 SV=2 - [E2RT62_CANLF]                                | 0,52  | 1 | 0 | 1 | 1  |
| F1Q2M4     | DNA topoisomerase 2 OS=Canis lupus familiaris GN=TOP2A PE=3 SV=2 - [F1Q2M4_CANLF]                             | 0,52  | 1 | 0 | 1 | 1  |
| J9PAY8     | DNA topoisomerase 2 OS=Canis lupus familiaris GN=TOP2A PE=3 SV=1 - [J9PAY8_CANLF]                             | 0,52  | 1 | 0 | 1 | 1  |
| F1PN11     | Histone deacetylase OS=Canis lupus familiaris GN=HDAC6 PE=4 SV=2 - [F1PN11_CANLF]                             | 0,52  | 1 | 0 | 1 | 1  |
| E2RG72     | WASH complex subunit 4 OS=Canis lupus familiaris GN=WASHC4 PE=4 SV=2 - [E2RG72_CANLF]                         | 0,51  | 1 | 0 | 1 | 1  |
| J9P227     | WASH complex subunit 4 OS=Canis lupus familiaris GN=WASHC4 PE=4 SV=1 - [J9P227_CANLF]                         | 0,51  | 1 | 0 | 1 | 1  |
| F1PIZ3     | Maestro like repeat family member 2B OS=Canis lupus familiaris GN=MROH2B PE=4 SV=2 - [F1PIZ3_CANLF]           | 0,5   | 1 | 1 | 1 | 1  |
| E2RKP7     | Pericentriolar material 1 OS=Canis lupus familiaris GN=PCM1 PE=4 SV=2 - [E2RKP7_CANLF]                        | 0,49  | 1 | 0 | 1 | 3  |
| F1PCE7     | Tetratricopeptide repeat and ankyrin repeat containing 1 OS=Canis lupus familiaris GN=TRANK1 PE=4 SV=2 - [F   | 0,48  | 1 | 0 | 1 | 1  |
| F1PD19     | Tetratricopeptide repeat and ankyrin repeat containing 1 OS=Canis lupus familiaris GN=TRANK1 PE=4 SV=2 - [F   | 0,48  | 1 | 0 | 1 | 1  |
| F1PGN5     | Protein tyrosine phosphatase, receptor type Z1 OS=Canis lupus familiaris GN=PTRPZ1 PE=4 SV=2 - [F1PGN5_CANLF] | 0,48  | 1 | 1 | 1 | 2  |
| J9NSW6     | Tetratricopeptide repeat and ankyrin repeat containing 1 OS=Canis lupus familiaris GN=TRANK1 PE=4 SV=1 - [J   | 0,47  | 1 | 0 | 1 | 1  |
| J9NWJ8     | Pericentriolar material 1 OS=Canis lupus familiaris GN=PCM1 PE=4 SV=1 - [J9NWJ8_CANLF]                        | 0,47  | 1 | 0 | 1 | 3  |
| J9P8W5     | Uncharacterized protein OS=Canis lupus familiaris PE=4 SV=1 - [J9P8W5_CANLF]                                  | 0,47  | 1 | 0 | 1 | 1  |
| E2REB1     | Structural maintenance of chromosomes flexible hinge domain containing 1 OS=Canis lupus familiaris GN=SMC     | 0,45  | 1 | 1 | 1 | 1  |
| F1PZF8     | Ubiquitin specific peptidase 47 OS=Canis lupus familiaris GN=USP47 PE=3 SV=2 - [F1PZF8_CANLF]                 | 0,44  | 1 | 1 | 1 | 1  |
| E2R5C5     | Talin 2 OS=Canis lupus familiaris GN=TLN2 PE=4 SV=2 - [E2R5C5_CANLF]                                          | 0,43  | 1 | 1 | 1 | 1  |
| Q5U820     | Cystic fibrosis transmembrane conductance regulator OS=Canis lupus familiaris GN=CFTR PE=2 SV=2 - [CFTR_C     | 0,4   | 1 | 0 | 1 | 1  |
| F6V711     | Uncharacterized protein OS=Canis lupus familiaris PE=4 SV=1 - [F6V711_CANLF]                                  | 0,38  | 1 | 1 | 1 | 1  |
| J9NU82     | Myosin heavy chain 14 OS=Canis lupus familiaris GN=MYH14 PE=3 SV=1 - [J9NU82_CANLF]                           | 0,35  | 1 | 0 | 1 | 1  |
| J9P1C1     | Kinesin family member 20B OS=Canis lupus familiaris GN=KIF20B PE=3 SV=1 - [J9P1C1_CANLF]                      | 0,34  | 1 | 0 | 1 | 1  |
| F1PYS6     | Myosin heavy chain 14 OS=Canis lupus familiaris GN=MYH14 PE=3 SV=2 - [F1PYS6_CANLF]                           | 0,34  | 1 | 0 | 1 | 1  |
| E2RN40     | Prune homology 2 OS=Canis lupus familiaris GN=PRUNE2 PE=4 SV=2 - [E2RN40_CANLF]                               | 0,33  | 1 | 0 | 1 | 1  |
| E2QU0T     | Kinesin family member 20B OS=Canis lupus familiaris GN=KIF20B PE=3 SV=2 - [E2QU0T_CANLF]                      | 0,33  | 1 | 0 | 1 | 1  |
| F1PIQ7     | Inositol 1,4,5-trisphosphate receptor type 1 OS=Canis lupus familiaris GN=ITPR1 PE=4 SV=2 - [F1PIQ7_CANLF]    | 0,33  | 1 | 0 | 1 | 1  |
| F1PW86     | Inositol 1,4,5-trisphosphate receptor type 1 OS=Canis lupus familiaris GN=ITPR1 PE=4 SV=2 - [F1PW86_CANLF]    | 0,33  | 1 | 0 | 1 | 1  |
| F6XBJ5     | Integrator complex subunit 1 OS=Canis lupus familiaris GN=INTS1 PE=4 SV=1 - [F6XBJ5_CANLF]                    | 0,32  | 1 | 0 | 1 | 1  |
| J9P992     | Myosin XVIII OS=Canis lupus familiaris GN=MYO18A PE=3 SV=1 - [J9P992_CANLF]                                   | 0,31  | 1 | 0 | 1 | 1  |
| F6Y037     | Myosin XVIII OS=Canis lupus familiaris GN=MYO18A PE=3 SV=1 - [F6Y037_CANLF]                                   | 0,29  | 1 | 1 | 1 | 1  |
| F6XLF1     | Matrix remodeling associated 5 OS=Canis lupus familiaris GN=MXRA5 PE=4 SV=1 - [F6XLF1_CANLF]                  | 0,28  | 1 | 0 | 1 | 1  |
| F1PYB2     | Cilia and flagella associated protein 46 OS=Canis lupus familiaris GN=CFAP46 PE=4 SV=2 - [F1PYB2_CANLF]       | 0,25  | 1 | 0 | 1 | 1  |
| E2R021     | Cilia and flagella associated protein 46 OS=Canis lupus familiaris GN=CFAP46 PE=4 SV=2 - [E2R021_CANLF]       | 0,22  | 1 | 0 | 1 | 1  |
| E2RBM4     | Helicase with zinc finger 2 OS=Canis lupus familiaris GN=HELZ2 PE=4 SV=2 - [E2RBM4_CANLF]                     | 0,21  | 1 | 0 | 1 | 10 |
| F1PRB7     | Testis expressed 15, meiosis and synapsis associated OS=Canis lupus familiaris GN=TEX15 PE=4 SV=2 - [F1PRB7   | 0,19  | 1 | 0 | 1 | 1  |
| F1PN38     | Baculoviral IAP repeat containing 6 OS=Canis lupus familiaris GN=BIRC6 PE=3 SV=2 - [F1PN38_CANLF]             | 0,15  | 1 | 1 | 1 | 1  |
| F6XXM1     | FAT atypical cadherin 1 OS=Canis lupus familiaris GN=FAT1 PE=3 SV=1 - [F6XXM1_CANLF]                          | 0,14  | 1 | 1 | 1 | 1  |
| F1PH55     | Plectin OS=Canis lupus familiaris GN=PLEC PE=4 SV=2 - [F1PH55_CANLF]                                          | 0,13  | 1 | 0 | 1 | 2  |
| E2R4N3     | Midasin OS=Canis lupus familiaris GN=MDN1 PE=3 SV=2 - [E2R4N3_CANLF]                                          | 0,13  | 1 | 0 | 1 | 6  |
| J9NZY7     | Midasin OS=Canis lupus familiaris GN=MDN1 PE=3 SV=1 - [J9NZY7_CANLF]                                          | 0,13  | 1 | 0 | 1 | 6  |
| J9PAW7     | Microtubule-actin crosslinking factor 1 OS=Canis lupus familiaris GN=MACF1 PE=4 SV=1 - [J9PAW7_CANLF]         | 0,08  | 1 | 1 | 1 | 1  |
| Q7M310     | Angiotensin I (Fragment) OS=Canis lupus familiaris PE=1 SV=1 - [Q7M310_CANLF]                                 | 100   | 1 | 1 | 1 | 1  |
| E2RS77     | CDC42 small effector 1 OS=Canis lupus familiaris GN=CDC42SE1 PE=4 SV=1 - [E2RS77_CANLF]                       | 50,63 | 1 | 1 | 1 | 1  |
| E5G723     | Collagen alpha 1 type I (Fragment) OS=Canis lupus familiaris GN=COL1A1 PE=2 SV=1 - [E5G723_CANLF]             | 25,32 | 1 | 0 | 1 | 1  |
| A0A0E3V495 | 30S ribosomal protein S17 OS=Pasteurella multocida subsp. multocida OH4807 GN=rpsQ PE=3 SV=1 - [A0A0E3        | 12,94 | 1 | 1 | 1 | 1  |
| O62801     | Prepro-alpha 1 type I collagen (Fragment) OS=Canis lupus familiaris PE=2 SV=1 - [O62801_CANLF]                | 11,3  | 1 | 0 | 1 | 1  |
| E2RH59     | Glucosamine-6-phosphate isomerase OS=Canis lupus familiaris GN=GNDPA2 PE=3 SV=2 - [E2RH59_CANLF]              | 10,51 | 1 | 1 | 1 | 1  |
| A0A0E3V418 | Inorganic pyrophosphatase OS=Pasteurella multocida subsp. multocida OH4807 GN=ppa PE=3 SV=1 - [A0A0E3         | 10,29 | 1 | 1 | 1 | 1  |
| A0A0E3ZQY8 | Bifunctional protein HldE OS=Pasteurella multocida subsp. multocida OH4807 GN=hldE PE=3 SV=1 - [A0A0E3ZC      | 9,66  | 1 | 1 | 1 | 1  |
| E2R7F8     | Interleukin 19 OS=Canis lupus familiaris GN=IL19 PE=4 SV=1 - [E2R7F8_CANLF]                                   | 9,6   | 1 | 1 | 1 | 1  |
| F6XEW2     | RNA binding protein with serine rich domain 1 OS=Canis lupus familiaris GN=RNPS1 PE=4 SV=1 - [F6XEW2_CANLF]   | 9,51  | 1 | 1 | 1 | 1  |

|            |                                                                                                               |      |   |   |   |   |
|------------|---------------------------------------------------------------------------------------------------------------|------|---|---|---|---|
| J9NYH3     | LLP homolog, long-term synaptic facilitation OS=Canis lupus familiaris GN=LLPH PE=4 SV=1 - [J9NYH3_CANLF]     | 9,46 | 1 | 1 | 1 | 1 |
| Q9GLN4     | Type I collagen alpha 1 chain (Fragment) OS=Canis lupus familiaris GN=COL1A1 PE=2 SV=1 - [Q9GLN4_CANLF]       | 9,26 | 1 | 0 | 1 | 1 |
| I7ENE2     | Ubiquitin carboxyl-terminal hydrolase (Fragment) OS=Canis lupus familiaris PE=2 SV=1 - [I7ENE2_CANLF]         | 8,84 | 1 | 0 | 1 | 7 |
| E2R9G5     | Guanine nucleotide-binding protein subunit gamma OS=Canis lupus familiaris GN=NG10 PE=3 SV=1 - [E2R9G5]       | 8,82 | 1 | 0 | 1 | 2 |
| J9NTE7     | 40S ribosomal protein S24 OS=Canis lupus familiaris PE=3 SV=1 - [J9NTE7_CANLF]                                | 8,33 | 1 | 0 | 1 | 1 |
| L7N0I3     | 40S ribosomal protein S24 OS=Canis lupus familiaris PE=3 SV=1 - [L7N0I3_CANLF]                                | 8,33 | 1 | 0 | 1 | 1 |
| E2RPB8     | C-type lectin domain family 3 member B OS=Canis lupus familiaris GN=CLEC3B PE=4 SV=2 - [E2RPB8_CANLF]         | 8    | 1 | 1 | 1 | 2 |
| A0A0E3ZRP3 | Protein YigB OS=Pasteurella multocida subsp. multocida OH4807 GN=I926_07430 PE=4 SV=1 - [A0A0E3ZRP3_P]        | 7,2  | 1 | 1 | 1 | 2 |
| F1PUK5     | Meis homeobox 3 OS=Canis lupus familiaris GN=MEIS3 PE=4 SV=2 - [F1PUK5_CANLF]                                 | 6,98 | 1 | 0 | 1 | 1 |
| J9P5S4     | Uncharacterized protein OS=Canis lupus familiaris PE=4 SV=1 - [J9P5S4_CANLF]                                  | 6,67 | 1 | 1 | 1 | 1 |
| F1PMQ3     | Meis homeobox 3 OS=Canis lupus familiaris GN=MEIS3 PE=4 SV=2 - [F1PMQ3_CANLF]                                 | 6,47 | 1 | 0 | 1 | 1 |
| E2R6K2     | Adenosine deaminase 2 OS=Canis lupus familiaris GN=ADA2 PE=4 SV=1 - [E2R6K2_CANLF]                            | 6,43 | 1 | 1 | 1 | 1 |
| F1PDY8     | Carbonic anhydrase 2 OS=Canis lupus familiaris GN=CA2 PE=4 SV=2 - [F1PDY8_CANLF]                              | 6,15 | 1 | 1 | 1 | 3 |
| F6XVD7     | Ubiquitin carboxyl-terminal hydrolase OS=Canis lupus familiaris GN=UCLH1 PE=3 SV=1 - [F6XVD7_CANLF]           | 5,8  | 1 | 0 | 1 | 7 |
| F1PP63     | Acyl-CoA dehydrogenase, short/branched chain OS=Canis lupus familiaris GN=ACADSB PE=3 SV=2 - [F1PP63_C]       | 5,79 | 1 | 1 | 1 | 1 |
| F1P897     | Glycoprotein M6A OS=Canis lupus familiaris GN=GPM6A PE=4 SV=2 - [F1P897_CANLF]                                | 5,76 | 1 | 1 | 1 | 1 |
| F1PPV4     | Uncharacterized protein OS=Canis lupus familiaris GN=NUTM2F PE=4 SV=2 - [F1PPV4_CANLF]                        | 5,76 | 1 | 1 | 1 | 1 |
| E2RN49     | Zinc finger SWIM-type containing 1 OS=Canis lupus familiaris GN=ZSWIM1 PE=4 SV=1 - [E2RN49_CANLF]             | 5,48 | 1 | 1 | 1 | 1 |
| J9PAD7     | Cerebellar degeneration related protein 2 OS=Canis lupus familiaris GN=CDR2 PE=4 SV=1 - [J9PAD7_CANLF]        | 5,37 | 1 | 0 | 1 | 1 |
| E2QWAA     | Tripartite motif containing 22 OS=Canis lupus familiaris GN=TRIM22 PE=4 SV=1 - [E2QWAA_CANLF]                 | 5,26 | 1 | 0 | 1 | 1 |
| F1PYW1     | Uncharacterized protein OS=Canis lupus familiaris PE=4 SV=2 - [F1PYW1_CANLF]                                  | 5,23 | 1 | 1 | 1 | 1 |
| E2R278     | tRNA-yW synthesizing protein 5 OS=Canis lupus familiaris GN=TYW5 PE=4 SV=2 - [E2R278_CANLF]                   | 5,08 | 1 | 1 | 1 | 1 |
| F1P7T7     | Collagen beta (1-O)galactosyltransferase 2 OS=Canis lupus familiaris GN=COLGALT2 PE=4 SV=2 - [F1P7T7_CANLF]   | 4,79 | 1 | 1 | 1 | 1 |
| J9NYP3     | THAP domain containing 7 OS=Canis lupus familiaris GN=THAP7 PE=4 SV=1 - [J9NYP3_CANLF]                        | 4,79 | 1 | 1 | 1 | 1 |
| J9P814     | RNA polymerase III subunit E OS=Canis lupus familiaris GN=POLR3E PE=4 SV=1 - [J9P814_CANLF]                   | 4,71 | 1 | 0 | 1 | 1 |
| E2R6D2     | Complement C8 gamma chain OS=Canis lupus familiaris GN=C8G PE=3 SV=1 - [E2R6D2_CANLF]                         | 4,46 | 1 | 0 | 1 | 1 |
| F1PH83     | Component of oligomeric golgi complex 7 OS=Canis lupus familiaris GN=COG7 PE=4 SV=2 - [F1PH83_CANLF]          | 4,37 | 1 | 0 | 1 | 2 |
| F1PG79     | Cerebellar degeneration related protein 2 OS=Canis lupus familiaris GN=CDR2 PE=4 SV=1 - [F1PG79_CANLF]        | 4,24 | 1 | 0 | 1 | 1 |
| E2RHP6     | Uncharacterized protein OS=Canis lupus familiaris GN=ZNF445 PE=4 SV=2 - [E2RHP6_CANLF]                        | 4,2  | 1 | 1 | 1 | 1 |
| E2QWEO     | COP9 signalosome subunit 5 OS=Canis lupus familiaris GN=COP5 PE=4 SV=1 - [E2QWEO_CANLF]                       | 4,19 | 1 | 1 | 1 | 3 |
| F1P6Y3     | Uncharacterized protein OS=Canis lupus familiaris PE=4 SV=1 - [F1P6Y3_CANLF]                                  | 4,04 | 1 | 1 | 1 | 2 |
| E2RMD6     | Component of oligomeric golgi complex 7 OS=Canis lupus familiaris GN=COG7 PE=4 SV=1 - [E2RMD6_CANLF]          | 3,9  | 1 | 0 | 1 | 2 |
| E2RHN7     | RNA polymerase III subunit E OS=Canis lupus familiaris GN=POLR3E PE=4 SV=2 - [E2RHN7_CANLF]                   | 3,85 | 1 | 0 | 1 | 1 |
| F1Q114     | Kelch like family member 5 OS=Canis lupus familiaris GN=KLHL5 PE=4 SV=2 - [F1Q114_CANLF]                      | 3,84 | 1 | 1 | 1 | 1 |
| J9P6G7     | Coiled-coil domain containing 136 OS=Canis lupus familiaris GN=CCDC136 PE=4 SV=1 - [J9P6G7_CANLF]             | 3,78 | 1 | 1 | 1 | 1 |
| J9P803     | LDL receptor related protein 12 OS=Canis lupus familiaris GN=LRP12 PE=4 SV=1 - [J9P803_CANLF]                 | 3,72 | 1 | 0 | 1 | 1 |
| J9NZC6     | Uncharacterized protein OS=Canis lupus familiaris GN=HADHB PE=3 SV=1 - [J9NZC6_CANLF]                         | 3,56 | 1 | 1 | 1 | 2 |
| F1PR89     | Adhesion G protein-coupled receptor D1 OS=Canis lupus familiaris GN=ADGRD1 PE=3 SV=2 - [F1PR89_CANLF]         | 3,44 | 1 | 0 | 1 | 2 |
| P325S3     | Outer capsid protein VP2 OS=African horse sickness virus 4 GN=VP2 PE=4 SV=2 - [VP2_AHSV4]                     | 3,3  | 1 | 0 | 1 | 1 |
| A0A0K2CWP3 | Major outer capsid protein OS=African horse sickness virus 4 GN=VP2 PE=4 SV=1 - [A0A0K2CWP3_AHSV4]            | 3,3  | 1 | 0 | 1 | 1 |
| A0A0H4NVK8 | Major outer capsid protein OS=African horse sickness virus 4 GN=VP2 PE=4 SV=1 - [A0A0H4NVK8_AHSV4]            | 3,3  | 1 | 0 | 1 | 1 |
| A0A189RMP4 | Major outer capsid protein OS=African horse sickness virus 4 GN=VP2 PE=4 SV=1 - [A0A189RMP4_AHSV4]            | 3,3  | 1 | 0 | 1 | 1 |
| A0A189RMP5 | Major outer capsid protein OS=African horse sickness virus 4 GN=VP2 PE=4 SV=1 - [A0A189RMP5_AHSV4]            | 3,3  | 1 | 0 | 1 | 1 |
| A0A0U1XN16 | Outer capsid protein OS=African horse sickness virus 4 GN=VP2 PE=4 SV=1 - [A0A0U1XN16_AHSV4]                  | 3,3  | 1 | 0 | 1 | 1 |
| A0A0N7CZJ3 | VP2 OS=African horse sickness virus 4 GN=VP2 PE=4 SV=1 - [A0A0N7CZJ3_AHSV4]                                   | 3,3  | 1 | 0 | 1 | 1 |
| A0A0S1NIU3 | VP2 OS=African horse sickness virus 4 GN=VP2 PE=4 SV=1 - [A0A0S1NIU3_AHSV4]                                   | 3,3  | 1 | 0 | 1 | 1 |
| A0A189RMQ5 | Major outer capsid protein OS=African horse sickness virus 4 GN=VP2 PE=4 SV=1 - [A0A189RMQ5_AHSV4]            | 3,3  | 1 | 0 | 1 | 1 |
| A0A0U1XN65 | Outer capsid protein OS=African horse sickness virus 4 GN=VP2 PE=4 SV=1 - [A0A0U1XN65_AHSV4]                  | 3,3  | 1 | 0 | 1 | 1 |
| F1PJY9     | Nucleolar GTP-binding protein 1 OS=Canis lupus familiaris GN=GTPBP4 PE=3 SV=2 - [F1PJY9_CANLF]                | 3,24 | 1 | 1 | 1 | 1 |
| F1PT94     | Myotubularin related protein 7 OS=Canis lupus familiaris GN=MTMR7 PE=3 SV=2 - [F1PT94_CANLF]                  | 3,18 | 1 | 1 | 1 | 1 |
| J9P7L5     | Uncharacterized protein OS=Canis lupus familiaris GN=LOC607552 PE=4 SV=1 - [J9P7L5_CANLF]                     | 3,17 | 1 | 0 | 1 | 2 |
| A0A0E3ZQ87 | Leucine-tRNA ligase OS=Pasteurella multocida subsp. multocida OH4807 GN=leuS PE=3 SV=1 - [A0A0E3ZQ87_]        | 3,14 | 1 | 1 | 1 | 1 |
| F1PPF3     | Uncharacterized protein OS=Canis lupus familiaris PE=4 SV=2 - [F1PPF3_CANLF]                                  | 3,11 | 1 | 1 | 1 | 1 |
| E2REK8     | Uncharacterized protein OS=Canis lupus familiaris GN=LOC482089 PE=4 SV=2 - [E2REK8_CANLF]                     | 3,02 | 1 | 1 | 1 | 1 |
| J9PBJ7     | Uncharacterized protein OS=Canis lupus familiaris PE=4 SV=1 - [J9PBJ7_CANLF]                                  | 2,99 | 1 | 1 | 1 | 1 |
| F1PMB5     | Sorting nexin 2 OS=Canis lupus familiaris GN=SNX2 PE=4 SV=2 - [F1PMB5_CANLF]                                  | 2,99 | 1 | 1 | 1 | 1 |
| F1P9S8     | LDL receptor related protein 12 OS=Canis lupus familiaris GN=LRP12 PE=4 SV=2 - [F1P9S8_CANLF]                 | 2,93 | 1 | 0 | 1 | 1 |
| Q4VSN4     | Dual serine/threonine and tyrosine protein kinase OS=Canis lupus familiaris GN=DSTYK PE=2 SV=1 - [DUSTY_CA]   | 2,9  | 1 | 1 | 1 | 1 |
| J9NV31     | Uncharacterized protein OS=Canis lupus familiaris PE=4 SV=1 - [J9NV31_CANLF]                                  | 2,76 | 1 | 0 | 1 | 1 |
| E2RG62     | Uncharacterized protein OS=Canis lupus familiaris GN=SMARCAD1 PE=4 SV=1 - [E2RG62_CANLF]                      | 2,73 | 1 | 0 | 1 | 1 |
| J9PA79     | Uncharacterized protein OS=Canis lupus familiaris GN=SMARCAD1 PE=4 SV=1 - [J9PA79_CANLF]                      | 2,73 | 1 | 0 | 1 | 1 |
| J9P362     | DNA cross-link repair 1C OS=Canis lupus familiaris GN=DCLRE1C PE=4 SV=1 - [J9P362_CANLF]                      | 2,65 | 1 | 0 | 1 | 1 |
| E2RBE9     | DNA cross-link repair 1C OS=Canis lupus familiaris GN=DCLRE1C PE=4 SV=1 - [E2RBE9_CANLF]                      | 2,6  | 1 | 0 | 1 | 1 |
| E2R074     | Uncharacterized protein OS=Canis lupus familiaris GN=LOC607552 PE=4 SV=1 - [E2R074_CANLF]                     | 2,56 | 1 | 0 | 1 | 2 |
| E2RL61     | Myomesin 3 OS=Canis lupus familiaris GN=MYOM3 PE=4 SV=2 - [E2RL61_CANLF]                                      | 2,55 | 1 | 1 | 1 | 1 |
| F1P9Q4     | Cullin 5 OS=Canis lupus familiaris GN=CUL5 PE=3 SV=2 - [F1P9Q4_CANLF]                                         | 2,52 | 1 | 0 | 1 | 1 |
| E2R3V1     | Fc receptor like 4 OS=Canis lupus familiaris GN=FCRL4 PE=4 SV=1 - [E2R3V1_CANLF]                              | 2,52 | 1 | 1 | 1 | 2 |
| Q6QNF4     | Hepatocyte growth factor activator OS=Canis lupus familiaris GN=HGFA PE=2 SV=1 - [HGFA_CANLF]                 | 2,45 | 1 | 0 | 1 | 2 |
| F1PAF3     | Hepatocyte growth factor activator OS=Canis lupus familiaris GN=HGFA PE=3 SV=1 - [F1PAF3_CANLF]               | 2,45 | 1 | 0 | 1 | 2 |
| E2R0R2     | Nephrocystin 3 OS=Canis lupus familiaris GN=NPHP3 PE=4 SV=2 - [E2R0R2_CANLF]                                  | 2,45 | 1 | 1 | 1 | 1 |
| E2RNJ2     | EF-hand calcium binding domain 3 OS=Canis lupus familiaris GN=EFCAB3 PE=4 SV=2 - [E2RNJ2_CANLF]               | 2,38 | 1 | 1 | 1 | 2 |
| F1PK57     | Uncharacterized protein OS=Canis lupus familiaris PE=1 SV=2 - [F1PK57_CANLF]                                  | 2,38 | 1 | 0 | 1 | 1 |
| F1Q4F4     | Zinc finger protein 536 OS=Canis lupus familiaris GN=ZNF536 PE=4 SV=2 - [F1Q4F4_CANLF]                        | 2,38 | 1 | 1 | 1 | 1 |
| J9PAXO     | Cullin 5 OS=Canis lupus familiaris GN=CUL5 PE=3 SV=1 - [J9PAXO_CANLF]                                         | 2,37 | 1 | 0 | 1 | 1 |
| E2RSP9     | Testis specific serine kinase 4 OS=Canis lupus familiaris GN=TSSK4 PE=4 SV=1 - [E2RSP9_CANLF]                 | 2,37 | 1 | 1 | 1 | 2 |
| F1PYZ5     | A-kinase anchoring protein 4 OS=Canis lupus familiaris GN=AKAP4 PE=4 SV=2 - [F1PYZ5_CANLF]                    | 2,36 | 1 | 1 | 1 | 1 |
| E2RQJ7     | Angiotensin like 2 OS=Canis lupus familiaris GN=AMOTL2 PE=4 SV=2 - [E2RQJ7_CANLF]                             | 2,32 | 1 | 0 | 1 | 1 |
| E2R1Z3     | Keratin 27 OS=Canis lupus familiaris GN=KRT27 PE=3 SV=2 - [E2R1Z3_CANLF]                                      | 2,26 | 1 | 0 | 1 | 3 |
| F1PFV3     | Rho GTPase activating protein 6 OS=Canis lupus familiaris GN=ARHGAP6 PE=4 SV=2 - [F1PFV3_CANLF]               | 2,24 | 1 | 1 | 1 | 2 |
| E2RJ63     | Angiotensin like 2 OS=Canis lupus familiaris GN=AMOTL2 PE=4 SV=2 - [E2RJ63_CANLF]                             | 2,15 | 1 | 0 | 1 | 1 |
| E2RCS6     | Mortality factor 4 like 2 OS=Canis lupus familiaris GN=MORF4L2 PE=4 SV=1 - [E2RCS6_CANLF]                     | 2,08 | 1 | 0 | 1 | 2 |
| E2QYD6     | ERCC excision repair 4, endonuclease catalytic subunit OS=Canis lupus familiaris GN=ERCC4 PE=4 SV=2 - [E2QYD] | 2,07 | 1 | 1 | 1 | 1 |
| A0A0E3ZQ40 | DNA topoisomerase 1 OS=Pasteurella multocida subsp. multocida OH4807 GN=topA PE=3 SV=1 - [A0A0E3ZQ40]         | 2,07 | 1 | 1 | 1 | 2 |
| E2QS80     | Keratin 25 OS=Canis lupus familiaris GN=KRT25 PE=3 SV=1 - [E2QS80_CANLF]                                      | 2    | 1 | 0 | 1 | 3 |
| F1Q170     | LDL receptor related protein 8 OS=Canis lupus familiaris GN=LRP8 PE=4 SV=2 - [F1Q170_CANLF]                   | 2    | 1 | 0 | 1 | 1 |
| E2QUU4     | Keratin 4 OS=Canis lupus familiaris GN=LOC608027 PE=3 SV=2 - [E2QUU4_CANLF]                                   | 2    | 1 | 1 | 1 | 1 |
| F1Q179     | LDL receptor related protein 8 OS=Canis lupus familiaris GN=LRP8 PE=4 SV=2 - [F1Q179_CANLF]                   | 1,99 | 1 | 0 | 1 | 1 |
| E2R170     | Keratin 27 OS=Canis lupus familiaris GN=KRT27 PE=3 SV=2 - [E2R170_CANLF]                                      | 1,97 | 1 | 0 | 1 | 3 |
| F6USG7     | Keratin 25 OS=Canis lupus familiaris GN=KRT25 PE=3 SV=1 - [F6USG7_CANLF]                                      | 1,96 | 1 | 0 | 1 | 3 |
| F1PPU4     | FANCD2 and FANCI associated nuclease 1 OS=Canis lupus familiaris GN=FAN1 PE=4 SV=2 - [F1PPU4_CANLF]           | 1,94 | 1 | 1 | 1 | 1 |
| E2R164     | Keratin 26 OS=Canis lupus familiaris GN=KRT26 PE=3 SV=1 - [E2R164_CANLF]                                      | 1,94 | 1 | 0 | 1 | 3 |
| E2R978     | Myelin transcription factor 1 like OS=Canis lupus familiaris GN=MYT1L PE=4 SV=2 - [E2R978_CANLF]              | 1,94 | 1 | 0 | 1 | 1 |
| F1PKX9     | Plexin A2 OS=Canis lupus familiaris GN=PLXNA2 PE=4 SV=1 - [F1PKX9_CANLF]                                      | 1,93 | 1 | 1 | 1 | 1 |

|            |                                                                                                                                   |       |   |   |   |   |
|------------|-----------------------------------------------------------------------------------------------------------------------------------|-------|---|---|---|---|
| J9NU32     | Coiled-coil domain containing 150 OS=Canis lupus familiaris GN=CCDC150 PE=4 SV=1 - [J9NU32_CANLF]                                 | 1,83  | 1 | 0 | 1 | 2 |
| E2RSE4     | Peptidylprolyl isomerase G OS=Canis lupus familiaris GN=PPIG PE=4 SV=2 - [E2RSE4_CANLF]                                           | 1,76  | 1 | 0 | 1 | 1 |
| J9PAE8     | Peptidylprolyl isomerase G OS=Canis lupus familiaris GN=PPIG PE=4 SV=1 - [J9PAE8_CANLF]                                           | 1,73  | 1 | 0 | 1 | 1 |
| E2QUS6     | Large tumor suppressor kinase 2 OS=Canis lupus familiaris GN=LATS2 PE=4 SV=1 - [E2QUS6_CANLF]                                     | 1,66  | 1 | 1 | 1 | 1 |
| E2RNV6     | DIS3 homolog, exosome endoribonuclease and 3'-5' exoribonuclease OS=Canis lupus familiaris GN=DIS3 PE=3 SV=1                      | 1,57  | 1 | 1 | 1 | 1 |
| F1PNA7     | Transmembrane protein 260 OS=Canis lupus familiaris GN=TMEM260 PE=4 SV=2 - [F1PNA7_CANLF]                                         | 1,56  | 1 | 1 | 1 | 1 |
| J9P966     | LUC7 like 3 pre-mRNA splicing factor OS=Canis lupus familiaris GN=LUC7L3 PE=4 SV=1 - [J9P966_CANLF]                               | 1,53  | 1 | 0 | 1 | 4 |
| F1PVL6     | Kinesin-like protein OS=Canis lupus familiaris GN=KIF2A PE=3 SV=2 - [F1PVL6_CANLF]                                                | 1,48  | 1 | 0 | 1 | 1 |
| F1PPN5     | Coiled-coil domain containing 150 OS=Canis lupus familiaris GN=CCDC150 PE=4 SV=2 - [F1PPN5_CANLF]                                 | 1,45  | 1 | 0 | 1 | 2 |
| E2R093     | Janus kinase and microtubule interacting protein 1 OS=Canis lupus familiaris GN=JAKMIP1 PE=4 SV=2 - [E2R093_CANLF]                | 1,44  | 1 | 1 | 1 | 6 |
| Q076A5     | Myosin-4 OS=Canis lupus familiaris GN=MYH4 PE=3 SV=1 - [MYH4_CANLF]                                                               | 1,44  | 1 | 0 | 1 | 1 |
| F1PHZ1     | Plexin A2 OS=Canis lupus familiaris GN=PLXNA2 PE=4 SV=2 - [F1PHZ1_CANLF]                                                          | 1,42  | 1 | 0 | 1 | 1 |
| E2RSS5     | LUC7 like 3 pre-mRNA splicing factor OS=Canis lupus familiaris GN=LUC7L3 PE=4 SV=2 - [E2RSS5_CANLF]                               | 1,39  | 1 | 0 | 1 | 4 |
| E2RPQ9     | WD repeat domain 63 OS=Canis lupus familiaris GN=WDR63 PE=4 SV=1 - [E2RPQ9_CANLF]                                                 | 1,34  | 1 | 1 | 1 | 1 |
| F1PSN6     | DENN domain containing 4B OS=Canis lupus familiaris GN=DENND4B PE=4 SV=2 - [F1PSN6_CANLF]                                         | 1,34  | 1 | 1 | 1 | 1 |
| F1Q070     | Shroom family member 2 OS=Canis lupus familiaris GN=SHROOM2 PE=4 SV=1 - [F1Q070_CANLF]                                            | 1,33  | 1 | 0 | 1 | 1 |
| J9NXX4     | Shroom family member 2 OS=Canis lupus familiaris GN=SHROOM2 PE=4 SV=1 - [J9NXX4_CANLF]                                            | 1,28  | 1 | 0 | 1 | 1 |
| E2RQG7     | Beta-carotene oxygenase 1 OS=Canis lupus familiaris GN=BCO1 PE=3 SV=2 - [E2RQG7_CANLF]                                            | 1,28  | 1 | 0 | 1 | 3 |
| J9P4F5     | Beta-carotene oxygenase 1 OS=Canis lupus familiaris GN=BCO1 PE=3 SV=1 - [J9P4F5_CANLF]                                            | 1,28  | 1 | 0 | 1 | 3 |
| J9P9X3     | Kinesin-like protein OS=Canis lupus familiaris GN=KIF2A PE=3 SV=1 - [J9P9X3_CANLF]                                                | 1,24  | 1 | 0 | 1 | 1 |
| E2R723     | Cytochrome P450 family 26 subfamily A member 1 OS=Canis lupus familiaris GN=CYP26A1 PE=3 SV=1 - [E2R723_CANLF]                    | 1,21  | 1 | 1 | 1 | 1 |
| E2QUS2     | Kinesin-like protein OS=Canis lupus familiaris GN=KIF3B PE=3 SV=1 - [E2QUS2_CANLF]                                                | 1,2   | 1 | 1 | 1 | 1 |
| J9P6W0     | Nuclear protein, coactivator of histone transcription OS=Canis lupus familiaris GN=NPAT PE=4 SV=1 - [J9P6W0_CANLF]                | 1,18  | 1 | 0 | 1 | 1 |
| F1PCZ7     | Nuclear protein, coactivator of histone transcription OS=Canis lupus familiaris GN=NPAT PE=4 SV=2 - [F1PCZ7_CANLF]                | 1,17  | 1 | 0 | 1 | 1 |
| E2R2P0     | Nucleoporin 62 OS=Canis lupus familiaris GN=NUP62 PE=4 SV=1 - [E2R2P0_CANLF]                                                      | 1,14  | 1 | 1 | 1 | 1 |
| A0A0E3V2J2 | Uncharacterized protein OS=Pasteurella multocida subsp. multocida OH4807 GN=I926_00575 PE=4 SV=1 - [A0A0E3V2J2_CANLF]             | 1,12  | 1 | 0 | 1 | 4 |
| E2RN39     | Transcriptional regulating factor 1 OS=Canis lupus familiaris GN=TRERF1 PE=4 SV=1 - [E2RN39_CANLF]                                | 1,08  | 1 | 1 | 1 | 2 |
| F1PUF3     | Tyrosine-protein kinase receptor OS=Canis lupus familiaris GN=ROS1 PE=3 SV=1 - [F1PUF3_CANLF]                                     | 1,07  | 1 | 1 | 1 | 1 |
| E2RH24     | Suppression of tumorigenicity 5 OS=Canis lupus familiaris GN=ST5 PE=4 SV=1 - [E2RH24_CANLF]                                       | 1,06  | 1 | 1 | 1 | 1 |
| E2R8W2     | Cell cycle progression 1 OS=Canis lupus familiaris GN=CCPG1 PE=4 SV=2 - [E2R8W2_CANLF]                                            | 1,02  | 1 | 0 | 1 | 1 |
| E2QTX0     | Calcium binding and coiled-coil domain 1 OS=Canis lupus familiaris GN=CALCOCO1 PE=4 SV=1 - [E2QTX0_CANLF]                         | 1,01  | 1 | 1 | 1 | 2 |
| F1PX83     | Ubiquitin specific peptidase 7 OS=Canis lupus familiaris GN=USP7 PE=3 SV=2 - [F1PX83_CANLF]                                       | 1,01  | 1 | 1 | 1 | 2 |
| F1PNH8     | Sperm specific antigen 2 OS=Canis lupus familiaris GN=SSFA2 PE=4 SV=2 - [F1PNH8_CANLF]                                            | 1,01  | 1 | 1 | 1 | 1 |
| F1P834     | Component of oligomeric golgi complex 5 OS=Canis lupus familiaris GN=COG5 PE=4 SV=2 - [F1P834_CANLF]                              | 1     | 1 | 1 | 1 | 1 |
| E2R8W0     | Cell cycle progression 1 OS=Canis lupus familiaris GN=CCPG1 PE=4 SV=1 - [E2R8W0_CANLF]                                            | 0,99  | 1 | 0 | 1 | 1 |
| F1PUV3     | Unc-45 myosin chaperone B OS=Canis lupus familiaris GN=UNC45B PE=4 SV=2 - [F1PUV3_CANLF]                                          | 0,95  | 1 | 1 | 1 | 1 |
| F1PIP7     | Collagen type VII alpha 1 chain OS=Canis lupus familiaris GN=COL7A1 PE=4 SV=1 - [F1PIP7_CANLF]                                    | 0,92  | 1 | 0 | 1 | 1 |
| Q7YRK8     | Type VII collagen OS=Canis lupus familiaris PE=2 SV=1 - [Q7YRK8_CANLF]                                                            | 0,92  | 1 | 0 | 1 | 1 |
| A0A0E3ZQT3 | Ribonuclease R OS=Pasteurella multocida subsp. multocida OH4807 GN=rrn PE=3 SV=1 - [A0A0E3ZQT3_PASMC]                             | 0,88  | 1 | 1 | 1 | 1 |
| F1P8U0     | Family with sequence similarity 13 member A OS=Canis lupus familiaris GN=FAM13A PE=4 SV=2 - [F1P8U0_CANLF]                        | 0,87  | 1 | 1 | 1 | 1 |
| P82179     | Triadin OS=Canis lupus familiaris GN=TRDN PE=1 SV=2 - [TRDN_CANLF]                                                                | 0,86  | 1 | 0 | 1 | 2 |
| F1PKD7     | Triadin OS=Canis lupus familiaris GN=TRDN PE=4 SV=1 - [F1PKD7_CANLF]                                                              | 0,86  | 1 | 0 | 1 | 2 |
| F1PW82     | Fermitin family member 1 OS=Canis lupus familiaris GN=FERMT1 PE=4 SV=2 - [F1PW82_CANLF]                                           | 0,86  | 1 | 0 | 1 | 4 |
| G1K275     | Triadin OS=Canis lupus familiaris GN=TRDN PE=4 SV=2 - [G1K275_CANLF]                                                              | 0,85  | 1 | 0 | 1 | 2 |
| A0A0A0MPA9 | Triadin OS=Canis lupus familiaris GN=TRDN PE=4 SV=1 - [A0A0A0MPA9_CANLF]                                                          | 0,84  | 1 | 0 | 1 | 2 |
| J9P596     | Triadin OS=Canis lupus familiaris GN=TRDN PE=4 SV=1 - [J9P596_CANLF]                                                              | 0,84  | 1 | 0 | 1 | 2 |
| F1P8I4     | G-patch domain containing 1 OS=Canis lupus familiaris GN=GPATCH1 PE=4 SV=2 - [F1P8I4_CANLF]                                       | 0,81  | 1 | 1 | 1 | 1 |
| E2RIC4     | DEAD-box helicase 24 OS=Canis lupus familiaris GN=DDX24 PE=4 SV=2 - [E2RIC4_CANLF]                                                | 0,73  | 1 | 0 | 1 | 2 |
| E2QYPO     | NIMA related kinase 9 OS=Canis lupus familiaris GN=NEK9 PE=4 SV=1 - [E2QYPO_CANLF]                                                | 0,72  | 1 | 1 | 1 | 2 |
| F1PBUS     | SMG1, nonsense mediated mRNA decay associated PI3K related kinase OS=Canis lupus familiaris GN=SMG1 PE=4 SV=1                     | 0,69  | 1 | 0 | 1 | 1 |
| J9NTCO     | SMG1, nonsense mediated mRNA decay associated PI3K related kinase OS=Canis lupus familiaris GN=SMG1 PE=4 SV=1                     | 0,69  | 1 | 0 | 1 | 1 |
| E2R498     | Coiled-coil domain containing 88A OS=Canis lupus familiaris GN=CCDC88A PE=4 SV=2 - [E2R498_CANLF]                                 | 0,64  | 1 | 1 | 1 | 1 |
| F1PI98     | NCK associated protein 5 OS=Canis lupus familiaris GN=NCKAP5 PE=4 SV=2 - [F1PI98_CANLF]                                           | 0,62  | 1 | 1 | 1 | 1 |
| F1PLE0     | RNA binding motif protein 20 OS=Canis lupus familiaris GN=RBM20 PE=4 SV=2 - [F1PLE0_CANLF]                                        | 0,59  | 1 | 0 | 1 | 1 |
| F1PKQ6     | RPRG-interacting protein 1 OS=Canis lupus familiaris GN=RPRGIP1 PE=2 SV=2 - [F1PKQ6_CANLF]                                        | 0,58  | 1 | 0 | 1 | 2 |
| Q076A8     | Developmental myosin heavy chain embryonic OS=Canis lupus familiaris GN=MYH3 PE=3 SV=1 - [Q076A8_CANLF]                           | 0,57  | 1 | 1 | 1 | 1 |
| F1PXN8     | RNA binding motif protein 20 OS=Canis lupus familiaris GN=RBM20 PE=4 SV=2 - [F1PXN8_CANLF]                                        | 0,57  | 1 | 0 | 1 | 1 |
| F1PKC1     | ATRX, chromatin remodeler OS=Canis lupus familiaris GN=ATRX PE=4 SV=2 - [F1PKC1_CANLF]                                            | 0,56  | 1 | 1 | 1 | 2 |
| F6Y4Y7     | TATA element modulatory factor 1 OS=Canis lupus familiaris GN=TMF1 PE=4 SV=1 - [F6Y4Y7_CANLF]                                     | 0,55  | 1 | 1 | 1 | 1 |
| F1PS32     | Family with sequence similarity 184 member A OS=Canis lupus familiaris GN=FAM184A PE=4 SV=2 - [F1PS32_CANLF]                      | 0,54  | 1 | 0 | 1 | 1 |
| F1PS31     | Family with sequence similarity 184 member A OS=Canis lupus familiaris GN=FAM184A PE=4 SV=2 - [F1PS31_CANLF]                      | 0,53  | 1 | 0 | 1 | 1 |
| E2RRQ0     | Uncharacterized protein OS=Canis lupus familiaris GN=LOC100856585 PE=4 SV=1 - [E2RRQ0_CANLF]                                      | 0,5   | 1 | 0 | 1 | 1 |
| E2RRP5     | Uncharacterized protein OS=Canis lupus familiaris GN=LOC100856585 PE=4 SV=2 - [E2RRP5_CANLF]                                      | 0,49  | 1 | 0 | 1 | 1 |
| E2REQ8     | Phosphorylase kinase regulatory subunit alpha 2 OS=Canis lupus familiaris GN=PHKA2 PE=4 SV=2 - [E2REQ8_CANLF]                     | 0,49  | 1 | 0 | 1 | 4 |
| F1PDF4     | Myosin-7 OS=Canis lupus familiaris GN=MYH7 PE=3 SV=2 - [F1PDF4_CANLF]                                                             | 0,48  | 1 | 0 | 1 | 2 |
| E2RJD1     | Myosin-7 OS=Canis lupus familiaris GN=MYH7 PE=3 SV=2 - [E2RJD1_CANLF]                                                             | 0,45  | 1 | 0 | 1 | 2 |
| P49824     | Myosin-7 OS=Canis lupus familiaris GN=MYH7 PE=1 SV=3 - [MYH7_CANLF]                                                               | 0,41  | 1 | 0 | 1 | 2 |
| F1PWR1     | Insulin like growth factor 2 receptor OS=Canis lupus familiaris GN=IGF2R PE=4 SV=2 - [F1PWR1_CANLF]                               | 0,41  | 1 | 0 | 1 | 1 |
| B1HOW0     | Cation-independent mannose-6-phosphate/insulin-like growth factor 2 receptor protein OS=Canis lupus familiaris GN=IGF2R PE=4 SV=1 | 0,4   | 1 | 0 | 1 | 1 |
| E2RLJ0     | Obscurin, cytoskeletal calmodulin and titin-interacting RhoGEF OS=Canis lupus familiaris GN=OBSCN PE=4 SV=1                       | 0,4   | 1 | 0 | 1 | 1 |
| J9NYI6     | Leucine rich repeats and IQ motif containing 1 OS=Canis lupus familiaris GN=LRRQ1 PE=4 SV=1 - [J9NYI6_CANLF]                      | 0,36  | 1 | 0 | 1 | 1 |
| F6XPP6     | Golgin B1 OS=Canis lupus familiaris GN=GOLGB1 PE=4 SV=1 - [F6XPP6_CANLF]                                                          | 0,34  | 1 | 1 | 1 | 1 |
| E2R200     | Centromere protein E OS=Canis lupus familiaris GN=CENPE PE=3 SV=2 - [E2R200_CANLF]                                                | 0,3   | 1 | 1 | 1 | 1 |
| F1PVV4     | Trio Rho guanine nucleotide exchange factor OS=Canis lupus familiaris GN=TRIO PE=4 SV=2 - [F1PVV4_CANLF]                          | 0,29  | 1 | 1 | 1 | 1 |
| J9JHM0     | Obscurin, cytoskeletal calmodulin and titin-interacting RhoGEF OS=Canis lupus familiaris GN=OBSCN PE=4 SV=1                       | 0,29  | 1 | 0 | 1 | 1 |
| J9P6H1     | Dynein axonemal heavy chain 5 OS=Canis lupus familiaris GN=DNAH5 PE=4 SV=1 - [J9P6H1_CANLF]                                       | 0,27  | 1 | 1 | 1 | 1 |
| E2R1Q3     | Myosin XVIII OS=Canis lupus familiaris GN=MYO18B PE=4 SV=2 - [E2R1Q3_CANLF]                                                       | 0,27  | 1 | 1 | 1 | 1 |
| F1PIW3     | Uncharacterized protein OS=Canis lupus familiaris PE=4 SV=2 - [F1PIW3_CANLF]                                                      | 0,17  | 1 | 1 | 1 | 1 |
| J9P9T0     | NADH:ubiquinone oxidoreductase complex assembly factor 8 OS=Canis lupus familiaris GN=NDUFAF8 PE=4 SV=1                           | 27,03 | 1 | 1 | 1 | 1 |
| E2R654     | Stannin OS=Canis lupus familiaris GN=SNN PE=4 SV=1 - [E2R654_CANLF]                                                               | 20,69 | 1 | 1 | 1 | 1 |
| E2QXJ3     | Uncharacterized protein OS=Canis lupus familiaris PE=4 SV=1 - [E2QXJ3_CANLF]                                                      | 18,1  | 1 | 1 | 1 | 1 |
| A0A0E3V485 | Uncharacterized protein OS=Pasteurella multocida subsp. multocida OH4807 GN=I926_07720 PE=4 SV=1 - [A0A0E3V485_CANLF]             | 15,19 | 1 | 1 | 1 | 1 |
| E2RNR3     | Decapping enzyme, scavenger OS=Canis lupus familiaris GN=Dcps PE=4 SV=2 - [E2RNR3_CANLF]                                          | 9,94  | 1 | 1 | 1 | 1 |
| E2R8T6     | REM2 and RAB like small GTPase 1 OS=Canis lupus familiaris GN=RSG1 PE=4 SV=2 - [E2R8T6_CANLF]                                     | 9,54  | 1 | 1 | 1 | 1 |
| E2RK84     | Testis expressed 35 OS=Canis lupus familiaris GN=TEX35 PE=4 SV=2 - [E2RK84_CANLF]                                                 | 7,89  | 1 | 1 | 1 | 1 |
| F6UXG8     | TBC/LysM-associated domain containing 1 OS=Canis lupus familiaris GN=TLDC1 PE=4 SV=1 - [F6UXG8_CANLF]                             | 7,03  | 1 | 1 | 1 | 1 |
| A0A0E3V4P5 | Bifunctional protein PyrR OS=Pasteurella multocida subsp. multocida OH4807 GN=pyrR PE=3 SV=1 - [A0A0E3V4P5_CANLF]                 | 6,08  | 1 | 1 | 1 | 2 |
| F1PBM4     | Potassium voltage-gated channel subfamily C member 4 OS=Canis lupus familiaris GN=KCNC4 PE=3 SV=2 - [F1PBM4_CANLF]                | 6,02  | 1 | 0 | 1 | 1 |
| J9NTS6     | Potassium voltage-gated channel subfamily C member 4 OS=Canis lupus familiaris GN=KCNC4 PE=3 SV=1 - [J9NTS6_CANLF]                | 5,71  | 1 | 0 | 1 | 1 |
| E2RLA8     | Platelet activating factor acetylhydrolase 1b catalytic subunit 3 OS=Canis lupus familiaris GN=PAFAH1B3 PE=4 SV=1                 | 5,56  | 1 | 1 | 1 | 1 |
| A0A0E3ZP46 | Uncharacterized protein OS=Pasteurella multocida subsp. multocida OH4807 GN=I926_03340 PE=4 SV=1 - [A0A0E3ZP46_CANLF]             | 4,49  | 1 | 1 | 1 | 2 |
| F1PXU8     | Uncharacterized protein OS=Canis lupus familiaris GN=C33H3orf30 PE=4 SV=2 - [F1PXU8_CANLF]                                        | 4,48  | 1 | 1 | 1 | 1 |
| J9P8R6     | Cornulin OS=Canis lupus familiaris GN=CRNN PE=4 SV=1 - [J9P8R6_CANLF]                                                             | 4,35  | 1 | 0 | 1 | 1 |

|            |                                                                                                               |      |   |   |   |   |
|------------|---------------------------------------------------------------------------------------------------------------|------|---|---|---|---|
| E2R9U5     | Cornulin OS=Canis lupus familiaris GN=CRNN PE=4 SV=1 - [E2R9U5_CANLF]                                         | 4,33 | 1 | 0 | 1 | 1 |
| F6XBZ5     | Tyrosine-protein kinase receptor OS=Canis lupus familiaris GN=NTRK1 PE=3 SV=1 - [F6XBZ5_CANLF]                | 4,27 | 1 | 1 | 1 | 1 |
| A0A0E3V3W3 | Protein NrfC OS=Pasteurella multocida subsp. multocida OH4807 GN=I926_03380 PE=4 SV=1 - [A0A0E3V3W3_          | 3,98 | 1 | 0 | 1 | 1 |
| E2REJ3     | BCAS3, microtubule associated cell migration factor OS=Canis lupus familiaris GN=BCAS3 PE=4 SV=2 - [E2REJ3_   | 3,9  | 1 | 0 | 1 | 1 |
| E2RHM7     | BCAS3, microtubule associated cell migration factor OS=Canis lupus familiaris GN=BCAS3 PE=4 SV=2 - [E2RHM7    | 3,85 | 1 | 0 | 1 | 1 |
| E2RFT3     | PAF1 homolog, Paf1/RNA polymerase II complex component OS=Canis lupus familiaris GN=PAF1 PE=4 SV=2 - [E       | 3,75 | 1 | 1 | 1 | 1 |
| E2QXF9     | tRNA methyltransferase 11 homolog OS=Canis lupus familiaris GN=TRMT11 PE=4 SV=2 - [E2QXF9_CANLF]              | 3,56 | 1 | 0 | 1 | 1 |
| F1PQW2     | Kelch like family member 4 OS=Canis lupus familiaris GN=KLHL4 PE=4 SV=2 - [F1PQW2_CANLF]                      | 3,48 | 1 | 0 | 1 | 2 |
| F1Q115     | Kelch like family member 4 OS=Canis lupus familiaris GN=KLHL4 PE=4 SV=2 - [F1Q115_CANLF]                      | 3,46 | 1 | 0 | 1 | 2 |
| E2R080     | Caveolae associated protein 4 OS=Canis lupus familiaris GN=CAVIN4 PE=4 SV=2 - [E2R080_CANLF]                  | 3,32 | 1 | 1 | 1 | 1 |
| E2RA71     | Uncharacterized protein OS=Canis lupus familiaris GN=VPS4A PE=3 SV=2 - [E2RA71_CANLF]                         | 3,2  | 1 | 1 | 1 | 1 |
| F1PER3     | Calcyphosine 2 OS=Canis lupus familiaris GN=CAPS2 PE=4 SV=2 - [F1PER3_CANLF]                                  | 3,18 | 1 | 1 | 1 | 1 |
| F1PG50     | Synaptonemal complex central element protein 1 OS=Canis lupus familiaris GN=SYCE1 PE=4 SV=2 - [F1PG50_C       | 3,17 | 1 | 0 | 1 | 1 |
| F1PZ02     | Uncharacterized protein OS=Canis lupus familiaris PE=3 SV=2 - [F1PZ02_CANLF]                                  | 3,08 | 1 | 1 | 1 | 1 |
| E2QRV7     | BCL2 interacting protein 1 OS=Canis lupus familiaris GN=BNIP1 PE=4 SV=2 - [E2QRV7_CANLF]                      | 3,07 | 1 | 0 | 1 | 1 |
| E2QYJ3     | Sorting nexin 1 OS=Canis lupus familiaris GN=SNX1 PE=4 SV=1 - [E2QYJ3_CANLF]                                  | 3,07 | 1 | 1 | 1 | 1 |
| E2RRG7     | tRNA methyltransferase 11 homolog OS=Canis lupus familiaris GN=TRMT11 PE=4 SV=2 - [E2RRG7_CANLF]              | 3,02 | 1 | 0 | 1 | 1 |
| Q8SPL7     | Paired-box 3 protein (Fragment) OS=Canis lupus familiaris GN=pax3 PE=4 SV=1 - [Q8SPL7_CANLF]                  | 3,02 | 1 | 0 | 1 | 1 |
| E2RK45     | Exocyst complex component 7 OS=Canis lupus familiaris GN=EXOC7 PE=4 SV=1 - [E2RK45_CANLF]                     | 2,99 | 1 | 0 | 1 | 1 |
| E2RIS2     | Synaptonemal complex central element protein 1 OS=Canis lupus familiaris GN=SYCE1 PE=4 SV=2 - [E2RIS2_CA      | 2,98 | 1 | 0 | 1 | 1 |
| F1PGV3     | Exocyst complex component 7 OS=Canis lupus familiaris GN=EXOC7 PE=4 SV=2 - [F1PGV3_CANLF]                     | 2,97 | 1 | 0 | 1 | 1 |
| F1PZG6     | Solute carrier family 16 member 11 OS=Canis lupus familiaris GN=SLC16A11 PE=4 SV=2 - [F1PZG6_CANLF]           | 2,79 | 1 | 1 | 1 | 2 |
| E2R961     | Transmembrane protein 41B OS=Canis lupus familiaris GN=TMEM41B PE=4 SV=1 - [E2R961_CANLF]                     | 2,75 | 1 | 1 | 1 | 1 |
| J9NVH2     | Ring finger protein 103 OS=Canis lupus familiaris GN=RNFI03 PE=4 SV=1 - [J9NVH2_CANLF]                        | 2,63 | 1 | 1 | 1 | 1 |
| E2RH85     | Uncharacterized protein OS=Canis lupus familiaris GN=PIK3R2 PE=4 SV=1 - [E2RH85_CANLF]                        | 2,62 | 1 | 1 | 1 | 1 |
| F1PUD1     | Mab-21 domain containing 2 OS=Canis lupus familiaris GN=MB21D2 PE=4 SV=2 - [F1PUD1_CANLF]                     | 2,6  | 1 | 1 | 1 | 1 |
| F1Q335     | Uncharacterized protein OS=Canis lupus familiaris GN=NLGN4X PE=4 SV=2 - [F1Q335_CANLF]                        | 2,33 | 1 | 0 | 1 | 2 |
| E2RMJ7     | Inositol monophosphatase domain containing 1 OS=Canis lupus familiaris GN=IMPAD1 PE=4 SV=2 - [E2RMJ7_C        | 2,22 | 1 | 1 | 1 | 1 |
| F1PD85     | EPH receptor B6 OS=Canis lupus familiaris GN=EPHB6 PE=4 SV=2 - [F1PD85_CANLF]                                 | 2,08 | 1 | 1 | 1 | 1 |
| F1PFM6     | Collagen type VI alpha 1 chain OS=Canis lupus familiaris GN=COL6A1 PE=4 SV=2 - [F1PFM6_CANLF]                 | 2,05 | 1 | 1 | 1 | 2 |
| J9P9N2     | Uncharacterized protein OS=Canis lupus familiaris PE=4 SV=1 - [J9P9N2_CANLF]                                  | 2,04 | 1 | 1 | 1 | 1 |
| F1PDF7     | GRAM domain containing 1B OS=Canis lupus familiaris GN=GRAMD1B PE=4 SV=2 - [F1PDF7_CANLF]                     | 2,02 | 1 | 0 | 1 | 1 |
| J9P2D0     | Spalt like transcription factor 1 OS=Canis lupus familiaris GN=SALL1 PE=4 SV=1 - [J9P2D0_CANLF]               | 2    | 1 | 0 | 1 | 1 |
| F1PRN5     | SECIS binding protein 2 OS=Canis lupus familiaris GN=SECISBP2 PE=4 SV=2 - [F1PRN5_CANLF]                      | 1,99 | 1 | 1 | 1 | 1 |
| E2RAC3     | Uncharacterized protein OS=Canis lupus familiaris GN=LOC476047 PE=4 SV=2 - [E2RAC3_CANLF]                     | 1,94 | 1 | 1 | 1 | 1 |
| F1PDF6     | GRAM domain containing 1B OS=Canis lupus familiaris GN=GRAMD1B PE=4 SV=2 - [F1PDF6_CANLF]                     | 1,89 | 1 | 0 | 1 | 1 |
| J9P3E8     | Zinc finger protein 770 OS=Canis lupus familiaris GN=ZNF770 PE=4 SV=1 - [J9P3E8_CANLF]                        | 1,88 | 1 | 1 | 1 | 1 |
| E2RRZ8     | Regulation of nuclear pre-mRNA domain containing 1B OS=Canis lupus familiaris GN=RPRD1B PE=4 SV=1 - [E2R      | 1,84 | 1 | 0 | 1 | 1 |
| E2RN85     | Spalt like transcription factor 1 OS=Canis lupus familiaris GN=SALL1 PE=4 SV=2 - [E2RN85_CANLF]               | 1,81 | 1 | 0 | 1 | 1 |
| J9P7U4     | Spalt like transcription factor 1 OS=Canis lupus familiaris GN=SALL1 PE=4 SV=1 - [J9P7U4_CANLF]               | 1,81 | 1 | 0 | 1 | 1 |
| J9NV61     | L3MBTL1, histone methyl-lysine binding protein OS=Canis lupus familiaris GN=L3MBTL1 PE=4 SV=1 - [J9NV61_C     | 1,68 | 1 | 1 | 1 | 2 |
| J9P3V1     | Listerin E3 ubiquitin protein ligase 1 OS=Canis lupus familiaris GN=LTN1 PE=4 SV=1 - [J9P3V1_CANLF]           | 1,58 | 1 | 0 | 1 | 1 |
| E2R1P6     | Uncharacterized protein OS=Canis lupus familiaris PE=4 SV=2 - [E2R1P6_CANLF]                                  | 1,57 | 1 | 0 | 1 | 1 |
| J9P6F5     | Shroom family member 4 OS=Canis lupus familiaris GN=SHROOM4 PE=4 SV=1 - [J9P6F5_CANLF]                        | 1,55 | 1 | 1 | 1 | 1 |
| F6XEY1     | Vaccinia related kinase 3 OS=Canis lupus familiaris GN=VRK3 PE=4 SV=1 - [F6XEY1_CANLF]                        | 1,54 | 1 | 0 | 1 | 1 |
| E2RSW0     | Cytoskeleton associated protein 5 OS=Canis lupus familiaris GN=CKAP5 PE=4 SV=2 - [E2RSW0_CANLF]               | 1,52 | 1 | 1 | 1 | 1 |
| F1PSB3     | Dedicator of cytokinesis 10 OS=Canis lupus familiaris GN=DOCK10 PE=3 SV=2 - [F1PSB3_CANLF]                    | 1,51 | 1 | 0 | 1 | 1 |
| J9P6I4     | Dedicator of cytokinesis 10 OS=Canis lupus familiaris GN=DOCK10 PE=3 SV=1 - [J9P6I4_CANLF]                    | 1,5  | 1 | 0 | 1 | 1 |
| F1PX06     | Shroom family member 4 OS=Canis lupus familiaris GN=SHROOM4 PE=4 SV=2 - [F1PX06_CANLF]                        | 1,48 | 1 | 0 | 1 | 1 |
| E2RN65     | Phosphatidylinositol-glycan biosynthesis class W protein OS=Canis lupus familiaris GN=PIGW PE=3 SV=1 - [E2R   | 1,39 | 1 | 1 | 1 | 1 |
| E2REW3     | ESF1 nucleolar pre-rRNA processing protein homolog OS=Canis lupus familiaris GN=ESF1 PE=4 SV=2 - [E2REW3_     | 1,3  | 1 | 1 | 1 | 1 |
| E2RIB3     | CYLD lysine 63 deubiquitinase OS=Canis lupus familiaris GN=CYLD PE=3 SV=1 - [E2RIB3_CANLF]                    | 1,26 | 1 | 1 | 1 | 1 |
| F1P9Y1     | ARFGEF family member 3 OS=Canis lupus familiaris GN=ARFGEF3 PE=4 SV=2 - [F1P9Y1_CANLF]                        | 1,24 | 1 | 0 | 1 | 1 |
| E2QX72     | Paired box 3 OS=Canis lupus familiaris GN=PAX3 PE=4 SV=2 - [E2QX72_CANLF]                                     | 1,24 | 1 | 0 | 1 | 1 |
| F1P991     | ST8 alpha-N-acetyl-neuraminidase alpha-2,8-sialyltransferase 3 OS=Canis lupus familiaris GN=ST8SIA3 PE=4 SV=2 | 1,23 | 1 | 0 | 1 | 1 |
| J9PAY0     | ARFGEF family member 3 OS=Canis lupus familiaris GN=ARFGEF3 PE=4 SV=1 - [J9PAY0_CANLF]                        | 1,23 | 1 | 0 | 1 | 1 |
| F1PNX6     | Paired box 7 OS=Canis lupus familiaris GN=PAX7 PE=3 SV=2 - [F1PNX6_CANLF]                                     | 1,19 | 1 | 0 | 1 | 1 |
| F1PWM1     | Uncharacterized protein OS=Canis lupus familiaris PE=4 SV=2 - [F1PWM1_CANLF]                                  | 1,14 | 1 | 1 | 1 | 1 |
| E2RM22     | Cyclin D binding myb like transcription factor 1 OS=Canis lupus familiaris GN=DMTF1 PE=4 SV=1 - [E2RM22_CA    | 1,05 | 1 | 1 | 1 | 1 |
| F1PAH2     | Voltage-dependent R-type calcium channel subunit alpha OS=Canis lupus familiaris GN=CACNA1E PE=3 SV=2 - [     | 1,01 | 1 | 0 | 1 | 1 |
| J9NZ73     | Sodium/potassium-transporting ATPase subunit alpha OS=Canis lupus familiaris GN=ATP12A PE=3 SV=1 - [J9NZ      | 0,96 | 1 | 0 | 1 | 1 |
| F1PE12     | Regulator of G protein signaling 22 OS=Canis lupus familiaris GN=RGSD22 PE=4 SV=2 - [F1PE12_CANLF]            | 0,94 | 1 | 1 | 1 | 1 |
| F1P8N4     | Sodium/potassium-transporting ATPase subunit alpha OS=Canis lupus familiaris GN=ATP12A PE=3 SV=2 - [F1PE      | 0,91 | 1 | 0 | 1 | 1 |
| F1PNE0     | Patched 1 OS=Canis lupus familiaris GN=PTCH1 PE=4 SV=2 - [F1PNE0_CANLF]                                       | 0,9  | 1 | 1 | 1 | 1 |
| F6XG82     | Strawberry notch homolog 2 OS=Canis lupus familiaris GN=SBNO2 PE=4 SV=1 - [F6XG82_CANLF]                      | 0,88 | 1 | 1 | 1 | 1 |
| F1PAF5     | Tyrosine-protein phosphatase non-receptor type OS=Canis lupus familiaris GN=PTPN4 PE=3 SV=2 - [F1PAF5_C       | 0,86 | 1 | 1 | 1 | 1 |
| E2RP24     | RB binding protein 6, ubiquitin ligase OS=Canis lupus familiaris GN=RBBP6 PE=4 SV=2 - [E2RP24_CANLF]          | 0,82 | 1 | 0 | 1 | 1 |
| F1PGL8     | A-kinase anchoring protein 12 OS=Canis lupus familiaris GN=AKAP12 PE=4 SV=2 - [F1PGL8_CANLF]                  | 0,8  | 1 | 1 | 1 | 1 |
| F1PGK0     | Listerin E3 ubiquitin protein ligase 1 OS=Canis lupus familiaris GN=LTN1 PE=4 SV=2 - [F1PGK0_CANLF]           | 0,79 | 1 | 0 | 1 | 1 |
| E2RL41     | Plexin A4 OS=Canis lupus familiaris GN=PLXNA4 PE=4 SV=2 - [E2RL41_CANLF]                                      | 0,79 | 1 | 0 | 1 | 2 |
| F1P6G0     | Plexin A1 OS=Canis lupus familiaris GN=PLXNA1 PE=4 SV=2 - [F1P6G0_CANLF]                                      | 0,79 | 1 | 0 | 1 | 2 |
| F1PJ65     | IQ motif containing GTPase activating protein 1 OS=Canis lupus familiaris GN=IQGAP1 PE=4 SV=2 - [F1PJ65_CA    | 0,78 | 1 | 1 | 1 | 1 |
| J9POA5     | RB binding protein 6, ubiquitin ligase OS=Canis lupus familiaris GN=RBBP6 PE=4 SV=1 - [J9POA5_CANLF]          | 0,78 | 1 | 0 | 1 | 1 |
| E2R4X9     | Pre-mRNA processing factor 8 OS=Canis lupus familiaris GN=PRPF8 PE=4 SV=2 - [E2R4X9_CANLF]                    | 0,73 | 1 | 1 | 1 | 1 |
| J9NW31     | Ryanodine receptor 1 OS=Canis lupus familiaris GN=RYR1 PE=4 SV=1 - [J9NW31_CANLF]                             | 0,66 | 1 | 0 | 1 | 1 |
| E2R571     | Meiosis regulator and mRNA stability factor 1 OS=Canis lupus familiaris GN=MARF1 PE=4 SV=1 - [E2R571_CAN      | 0,63 | 1 | 1 | 1 | 1 |
| F1PC09     | Microtubule associated monoxygenase, calponin and LIM domain containing 1 OS=Canis lupus familiaris GN=       | 0,62 | 1 | 1 | 1 | 1 |
| J9P3Y9     | Uncharacterized protein OS=Canis lupus familiaris PE=4 SV=1 - [J9P3Y9_CANLF]                                  | 0,6  | 1 | 0 | 1 | 2 |
| F1P780     | Exophilin 5 OS=Canis lupus familiaris GN=EXPH5 PE=4 SV=1 - [F1P780_CANLF]                                     | 0,57 | 1 | 0 | 1 | 1 |
| J9NSZ6     | Dynein axonemal heavy chain 8 OS=Canis lupus familiaris GN=DNAH8 PE=4 SV=1 - [J9NSZ6_CANLF]                   | 0,57 | 1 | 0 | 1 | 1 |
| J9P4W7     | von Willebrand factor A domain containing 3B OS=Canis lupus familiaris GN=VWA3B PE=4 SV=1 - [J9P4W7_CAN       | 0,56 | 1 | 0 | 1 | 1 |
| J9NT90     | Exophilin 5 OS=Canis lupus familiaris GN=EXPH5 PE=4 SV=1 - [J9NT90_CANLF]                                     | 0,55 | 1 | 0 | 1 | 1 |
| E2QUR1     | Chromodomain helicase DNA binding protein 8 OS=Canis lupus familiaris GN=CHD8 PE=4 SV=2 - [E2QUR1_CAN         | 0,55 | 1 | 0 | 1 | 1 |
| J9NUZ2     | Dynein axonemal heavy chain 8 OS=Canis lupus familiaris GN=DNAH8 PE=4 SV=1 - [J9NUZ2_CANLF]                   | 0,55 | 1 | 0 | 1 | 1 |
| E2REK9     | Dynein axonemal heavy chain 8 OS=Canis lupus familiaris GN=DNAH8 PE=4 SV=2 - [E2REK9_CANLF]                   | 0,54 | 1 | 0 | 1 | 1 |
| E2RIS0     | von Willebrand factor A domain containing 3B OS=Canis lupus familiaris GN=VWA3B PE=4 SV=2 - [E2RIS0_CAN       | 0,54 | 1 | 0 | 1 | 1 |
| F1PIS0     | Ryanodine receptor 1 OS=Canis lupus familiaris GN=RYR1 PE=4 SV=2 - [F1PIS0_CANLF]                             | 0,53 | 1 | 0 | 1 | 1 |
| E2RLY8     | Cullin 9 OS=Canis lupus familiaris GN=CUL9 PE=3 SV=2 - [E2RLY8_CANLF]                                         | 0,52 | 1 | 1 | 1 | 2 |
| J9NWD8     | HECT and RLD domain containing E3 ubiquitin protein ligase family member 1 OS=Canis lupus familiaris GN=HE    | 0,51 | 1 | 0 | 1 | 2 |
| E2R280     | Uncharacterized protein OS=Canis lupus familiaris PE=4 SV=2 - [E2R280_CANLF]                                  | 0,49 | 1 | 0 | 1 | 2 |
| E2QUS7     | Chromodomain-helicase-DNA-binding protein 8 OS=Canis lupus familiaris GN=CHD8 PE=3 SV=2 - [E2QUS7_CAN         | 0,46 | 1 | 0 | 1 | 1 |
| F1PBL9     | Human immunodeficiency virus type I enhancer binding protein 2 OS=Canis lupus familiaris GN=HIVEP2 PE=4 S     | 0,45 | 1 | 1 | 1 | 1 |
| J9NRQ0     | Teneurin transmembrane protein 3 OS=Canis lupus familiaris GN=TENM3 PE=4 SV=1 - [J9NRQ0_CANLF]                | 0,45 | 1 | 0 | 1 | 3 |



|            |                                                                                                               |       |   |   |   |   |
|------------|---------------------------------------------------------------------------------------------------------------|-------|---|---|---|---|
| E2QYQ5     | HECT and RLD domain containing E3 ubiquitin protein ligase family member 1 OS=Canis lupus familiaris GN=HE    | 0,43  | 1 | 0 | 1 | 2 |
| F1P9A6     | Neurexin transmembrane protein 3 OS=Canis lupus familiaris GN=TNM3 PE=4 SV=2 - [F1P9A6_CANLF]                 | 0,41  | 1 | 0 | 1 | 3 |
| F1Q450     | HECT domain E3 ubiquitin protein ligase 4 OS=Canis lupus familiaris GN=HECTD4 PE=4 SV=2 - [F1Q450_CANLF]      | 0,38  | 1 | 0 | 1 | 1 |
| E2R054     | Kinesin family member 14 OS=Canis lupus familiaris GN=KIF14 PE=3 SV=1 - [E2R054_CANLF]                        | 0,36  | 1 | 0 | 1 | 1 |
| E2R0K6     | HECT domain E3 ubiquitin protein ligase 4 OS=Canis lupus familiaris GN=HECTD4 PE=4 SV=2 - [E2R0K6_CANLF]      | 0,35  | 1 | 0 | 1 | 1 |
| E2Q5C2     | Tet methylcytosine dioxygenase 1 OS=Canis lupus familiaris GN=TET1 PE=4 SV=1 - [E2Q5C2_CANLF]                 | 0,33  | 1 | 0 | 1 | 1 |
| F1P9A1     | Vacuolar protein sorting 13 homolog D OS=Canis lupus familiaris GN=VPS13D PE=4 SV=2 - [F1P9A1_CANLF]          | 0,32  | 1 | 0 | 1 | 1 |
| J9NZV6     | Tet methylcytosine dioxygenase 1 OS=Canis lupus familiaris GN=TET1 PE=4 SV=1 - [J9NZV6_CANLF]                 | 0,32  | 1 | 0 | 1 | 1 |
| F1PGL1     | Versican OS=Canis lupus familiaris GN=VCAN PE=4 SV=2 - [F1PGL1_CANLF]                                         | 0,32  | 1 | 1 | 1 | 1 |
| E2RN10     | Myosin IXA OS=Canis lupus familiaris GN=MYO9A PE=4 SV=2 - [E2RN10_CANLF]                                      | 0,23  | 1 | 0 | 1 | 1 |
| J9P187     | Myosin IXA OS=Canis lupus familiaris GN=MYO9A PE=4 SV=1 - [J9P187_CANLF]                                      | 0,23  | 1 | 0 | 1 | 1 |
| J9NW38     | Uncharacterized protein OS=Canis lupus familiaris GN=LOC611589 PE=4 SV=1 - [J9NW38_CANLF]                     | 0,14  | 1 | 0 | 1 | 1 |
| F1PRF6     | Uncharacterized protein OS=Canis lupus familiaris GN=LOC611589 PE=4 SV=2 - [F1PRF6_CANLF]                     | 0,13  | 1 | 0 | 1 | 1 |
| E2RI62     | Molybdopter synthase catalytic subunit OS=Canis lupus familiaris GN=MOC52 PE=3 SV=2 - [E2RI62_CANLF]          | 5,95  | 1 | 0 | 1 | 1 |
| E2R9Q9     | SPC24, NDC80 kinetochore complex component OS=Canis lupus familiaris GN=SPC24 PE=4 SV=2 - [E2R9Q9_CA          | 5,58  | 1 | 1 | 1 | 1 |
| E2R0Y2     | Molybdopter synthase catalytic subunit OS=Canis lupus familiaris GN=MOC52 PE=3 SV=1 - [E2R0Y2_CANLF]          | 5,5   | 1 | 0 | 1 | 1 |
| E2QUT6     | Uncharacterized protein OS=Canis lupus familiaris PE=4 SV=1 - [E2QUT6_CANLF]                                  | 4,77  | 1 | 1 | 1 | 1 |
| A0A0E3ZP33 | Ischorismate synthase MenF OS=Pasteurella multocida subsp. multocida OH4807 GN=menF PE=3 SV=1 - [A0A          | 4,64  | 1 | 1 | 1 | 1 |
| E2QV58     | Olfactory receptor OS=Canis lupus familiaris GN=OR4N2 PE=3 SV=2 - [E2QV58_CANLF]                              | 4,3   | 1 | 0 | 1 | 1 |
| F1PJI2     | Solute carrier family 36 member 4 OS=Canis lupus familiaris GN=SLC36A4 PE=4 SV=2 - [F1PJI2_CANLF]             | 4,28  | 1 | 1 | 1 | 1 |
| E2RD57     | Olfactory receptor OS=Canis lupus familiaris GN=LOC482537 PE=3 SV=2 - [E2RD57_CANLF]                          | 4,22  | 1 | 0 | 1 | 1 |
| J9PB63     | Keratin 5 OS=Canis lupus familiaris GN=KRT5 PE=4 SV=1 - [J9PB63_CANLF]                                        | 3,88  | 1 | 0 | 1 | 1 |
| J9P969     | AHNAK nucleoprotein OS=Canis lupus familiaris GN=AHNAK PE=4 SV=1 - [J9P969_CANLF]                             | 3,81  | 1 | 1 | 1 | 1 |
| E2RAF2     | Uncharacterized protein OS=Canis lupus familiaris GN=KLC1 PE=4 SV=2 - [E2RAF2_CANLF]                          | 1,95  | 1 | 0 | 1 | 1 |
| E2RAF0     | Uncharacterized protein OS=Canis lupus familiaris GN=KLC1 PE=4 SV=2 - [E2RAF0_CANLF]                          | 1,74  | 1 | 0 | 1 | 1 |
| J9P7J3     | Uncharacterized protein OS=Canis lupus familiaris PE=4 SV=1 - [J9P7J3_CANLF]                                  | 1,67  | 1 | 1 | 1 | 1 |
| J9P925     | Rac/Cdc42 guanine nucleotide exchange factor 6 OS=Canis lupus familiaris GN=ARHGEF6 PE=4 SV=1 - [J9P925_      | 1,61  | 1 | 0 | 1 | 1 |
| E2R0Z1     | Rac/Cdc42 guanine nucleotide exchange factor 6 OS=Canis lupus familiaris GN=ARHGEF6 PE=4 SV=2 - [E2R0Z1_      | 1,29  | 1 | 0 | 1 | 1 |
| E2REP7     | Zinc finger with KRAB and SCAN domains 2 OS=Canis lupus familiaris GN=ZKSCAN2 PE=4 SV=2 - [E2REP7_CANL        | 1,24  | 1 | 1 | 1 | 1 |
| F1PF23     | Fanconi anemia complementation group I OS=Canis lupus familiaris GN=FANCI PE=4 SV=2 - [F1PF23_CANLF]          | 0,98  | 1 | 1 | 1 | 1 |
| F1PKR8     | Tensin 2 OS=Canis lupus familiaris GN=TNS2 PE=4 SV=2 - [F1PKR8_CANLF]                                         | 0,78  | 1 | 0 | 1 | 1 |
| E2R0D7     | Collagen type VI alpha 6 chain OS=Canis lupus familiaris GN=COL6A6 PE=4 SV=2 - [E2R0D7_CANLF]                 | 0,66  | 1 | 1 | 1 | 1 |
| F1PX71     | Myosin VB OS=Canis lupus familiaris GN=MYO5B PE=4 SV=2 - [F1PX71_CANLF]                                       | 0,49  | 1 | 1 | 1 | 1 |
| O97592     | Dystrophin OS=Canis lupus familiaris GN=DMD PE=2 SV=1 - [DMD_CANLF]                                           | 0,41  | 1 | 0 | 1 | 1 |
| D1MEQ0     | Dystrophin OS=Canis lupus familiaris PE=2 SV=1 - [D1MEQ0_CANLF]                                               | 0,41  | 1 | 0 | 1 | 1 |
| F1P7G4     | Dystrophin (Fragment) OS=Canis lupus familiaris GN=DMD PE=4 SV=2 - [F1P7G4_CANLF]                             | 0,41  | 1 | 0 | 1 | 1 |
| E2RQ26     | Histone-lysine N-methyltransferase OS=Canis lupus familiaris GN=KMT2D PE=4 SV=2 - [E2RQ26_CANLF]              | 0,23  | 1 | 0 | 1 | 1 |
| J9P0X8     | Histone-lysine N-methyltransferase OS=Canis lupus familiaris GN=KMT2D PE=4 SV=1 - [J9P0X8_CANLF]              | 0,23  | 1 | 0 | 1 | 1 |
| E2R9Z6     | Kinesin family member 27 OS=Canis lupus familiaris GN=KIF27 PE=3 SV=1 - [E2R9Z6_CANLF]                        | 0,64  | 1 | 0 | 1 | 1 |
| E2RKJ6     | Zinc finger and BTB domain containing 11 OS=Canis lupus familiaris GN=ZBTB11 PE=4 SV=1 - [E2RKJ6_CANLF]       | 2,66  | 1 | 0 | 1 | 1 |
| J9P4R3     | Zinc finger and BTB domain containing 11 OS=Canis lupus familiaris GN=ZBTB11 PE=4 SV=1 - [J9P4R3_CANLF]       | 3,04  | 1 | 0 | 1 | 1 |
| A0A0E3ZS10 | Uncharacterized protein OS=Pasteurella multocida subsp. multocida OH4807 GN=I926_08325 PE=4 SV=1 - [A0A       | 3,89  | 1 | 1 | 1 | 1 |
| E2QV33     | Mediator complex subunit 22 OS=Canis lupus familiaris GN=MED22 PE=4 SV=1 - [E2QV33_CANLF]                     | 5,39  | 1 | 1 | 1 | 1 |
| F1Q0F4     | Peptidylprolyl isomerase OS=Canis lupus familiaris GN=FKBP15 PE=4 SV=2 - [F1Q0F4_CANLF]                       | 0,75  | 1 | 1 | 1 | 1 |
| Q864L3     | Sodium channel subunit beta-2 OS=Canis lupus familiaris GN=SCN2B PE=2 SV=2 - [SCN2B_CANLF]                    | 4,65  | 1 | 0 | 1 | 1 |
| J9P9N8     | Sodium channel subunit beta-2 OS=Canis lupus familiaris GN=SCN2B PE=4 SV=1 - [J9P9N8_CANLF]                   | 3,86  | 1 | 0 | 1 | 1 |
| F1PYB7     | Centrosomal protein 162 OS=Canis lupus familiaris GN=CEP162 PE=4 SV=2 - [F1PYB7_CANLF]                        | 0,64  | 1 | 1 | 1 | 1 |
| J9NWK0     | RAD51 associated protein 2 OS=Canis lupus familiaris GN=RAD51AP2 PE=4 SV=1 - [J9NWK0_CANLF]                   | 1,14  | 1 | 0 | 1 | 1 |
| J9P2K3     | RAD51 associated protein 2 OS=Canis lupus familiaris GN=RAD51AP2 PE=4 SV=1 - [J9P2K3_CANLF]                   | 1,15  | 1 | 0 | 1 | 1 |
| E2R9H8     | WNK lysine deficient protein kinase 3 OS=Canis lupus familiaris GN=WNK3 PE=4 SV=1 - [E2R9H8_CANLF]            | 2,98  | 1 | 0 | 1 | 1 |
| J9P5T2     | WNK lysine deficient protein kinase 3 OS=Canis lupus familiaris GN=WNK3 PE=4 SV=1 - [J9P5T2_CANLF]            | 1,24  | 1 | 0 | 1 | 1 |
| F1P8L4     | Family with sequence similarity 208 member B OS=Canis lupus familiaris GN=FAM208B PE=4 SV=2 - [F1P8L4_C       | 0,76  | 1 | 1 | 1 | 1 |
| E2RFH8     | Uncharacterized protein OS=Canis lupus familiaris GN=TRIM16 PE=4 SV=2 - [E2RFH8_CANLF]                        | 1,14  | 1 | 1 | 1 | 1 |
| F1PF40     | G protein-coupled receptor G3 OS=Canis lupus familiaris GN=GPR63 PE=4 SV=2 - [F1PF40_CANLF]                   | 6,55  | 1 | 1 | 1 | 1 |
| A0A0E3ZNT4 | Putative deoxyribonuclease YjyV OS=Pasteurella multocida subsp. multocida OH4807 GN=I926_02590 PE=4 SV=       | 4,56  | 1 | 1 | 1 | 1 |
| F1PLG0     | Uncharacterized protein OS=Canis lupus familiaris GN=EMR4 PE=3 SV=2 - [F1PLG0_CANLF]                          | 2,51  | 1 | 0 | 1 | 1 |
| Q2Q419     | EMR4 OS=Canis lupus familiaris PE=2 SV=1 - [Q2Q419_CANLF]                                                     | 2,51  | 1 | 0 | 1 | 1 |
| F1PCZ6     | Actin binding LIM protein family member 2 OS=Canis lupus familiaris GN=ABLIM2 PE=4 SV=2 - [F1PCZ6_CANLF]      | 3,11  | 1 | 0 | 1 | 1 |
| E2RF1      | DEAD-box helicase 42 OS=Canis lupus familiaris GN=DDX42 PE=4 SV=1 - [E2RF1_CANLF]                             | 2,57  | 1 | 1 | 1 | 1 |
| E2RPF7     | Phospholipase A2 group VI OS=Canis lupus familiaris GN=PLA2G6 PE=4 SV=2 - [E2RPF7_CANLF]                      | 4,33  | 1 | 0 | 1 | 2 |
| E2RPF9     | Phospholipase A2 group VI OS=Canis lupus familiaris GN=PLA2G6 PE=4 SV=1 - [E2RPF9_CANLF]                      | 2,61  | 1 | 0 | 1 | 2 |
| E2RF57     | ERCC excision repair 8, CSA ubiquitin ligase complex subunit OS=Canis lupus familiaris GN=ERCC8 PE=4 SV=1 - [ | 5,3   | 1 | 1 | 1 | 2 |
| E2RFJ1     | Uncharacterized protein OS=Canis lupus familiaris GN=PCDH11X PE=4 SV=2 - [E2RFJ1_CANLF]                       | 2,32  | 1 | 1 | 1 | 1 |
| E2R985     | Actin-related protein 2/3 complex subunit 3 OS=Canis lupus familiaris PE=3 SV=2 - [E2R985_CANLF]              | 6,9   | 1 | 0 | 1 | 1 |
| J9P309     | Actin-related protein 2/3 complex subunit 3 OS=Canis lupus familiaris GN=ARPC3 PE=3 SV=1 - [J9P309_CANLF]     | 7,87  | 1 | 0 | 1 | 1 |
| P24460     | Cytochrome P450 2B11 OS=Canis lupus familiaris GN=CYP2B11 PE=2 SV=1 - [CP2BB_CANLF]                           | 3,85  | 1 | 0 | 1 | 1 |
| E2R970     | Ubiquitin specific peptidase 24 OS=Canis lupus familiaris GN=USP24 PE=3 SV=2 - [E2R970_CANLF]                 | 0,87  | 1 | 1 | 1 | 1 |
| F1PNK2     | Uncharacterized protein OS=Canis lupus familiaris GN=CYP2B6 PE=3 SV=2 - [F1PNK2_CANLF]                        | 3,63  | 1 | 0 | 1 | 1 |
| X5KJB3     | Cytochrome-P450-2B11 OS=Canis lupus familiaris GN=CYP2B11 PE=2 SV=1 - [X5KJB3_CANLF]                          | 3,85  | 1 | 0 | 1 | 1 |
| F6Y1C9     | DNA polymerase OS=Canis lupus familiaris GN=POLA1 PE=3 SV=1 - [F6Y1C9_CANLF]                                  | 1,3   | 1 | 0 | 1 | 1 |
| F6UWX1     | THO complex 5 OS=Canis lupus familiaris GN=THOC5 PE=4 SV=1 - [F6UWX1_CANLF]                                   | 1,46  | 1 | 1 | 1 | 1 |
| F1PTP2     | Sepiapterin reductase (7,8-dihydrobiopterin:NADP+ oxidoreductase) OS=Canis lupus familiaris GN=SPR PE=4 SV    | 4,87  | 1 | 1 | 1 | 1 |
| A0A0E3ZS08 | Signal recognition particle protein OS=Pasteurella multocida subsp. multocida OH4807 GN=ffh PE=3 SV=1 - [A0   | 4,59  | 1 | 0 | 1 | 6 |
| E2R289     | Histone-lysine N-methyltransferase OS=Canis lupus familiaris GN=SUV39H1 PE=3 SV=1 - [E2R289_CANLF]            | 2,43  | 1 | 1 | 1 | 1 |
| O46674     | Sarcoplasmic/endoplasmic reticulum calcium ATPase 2 OS=Canis lupus familiaris GN=ATP2A2 PE=2 SV=1 - [AT2      | 1,5   | 1 | 0 | 1 | 1 |
| E2QUQ0     | Actinin alpha 2 OS=Canis lupus familiaris GN=ACTN2 PE=4 SV=2 - [E2QUQ0_CANLF]                                 | 1,34  | 1 | 1 | 1 | 1 |
| E2RLK0     | L-lactate dehydrogenase OS=Canis lupus familiaris GN=LDHC PE=3 SV=1 - [E2RLK0_CANLF]                          | 3,6   | 1 | 0 | 1 | 1 |
| E2RRC9     | Phosphoglycerate kinase OS=Canis lupus familiaris GN=PGK1 PE=3 SV=1 - [E2RRC9_CANLF]                          | 3,6   | 1 | 1 | 1 | 1 |
| F1PS82     | Fructose-bisphosphate aldolase OS=Canis lupus familiaris GN=ALDOC PE=3 SV=2 - [F1PS82_CANLF]                  | 5,83  | 1 | 0 | 1 | 1 |
| H9N9H3     | Lactate dehydrogenase C isoform 4 OS=Canis lupus familiaris GN=LDHC PE=2 SV=1 - [H9N9H3_CANLF]                | 3,28  | 1 | 0 | 1 | 1 |
| J9P540     | Glycerolaldehyde-3-phosphate dehydrogenase OS=Canis lupus familiaris GN=LOC477441 PE=3 SV=1 - [J9P540_C       | 4,19  | 1 | 0 | 1 | 2 |
| F1PL63     | Fructose-bisphosphate aldolase OS=Canis lupus familiaris GN=ALDOC PE=3 SV=1 - [F1PL63_CANLF]                  | 7,14  | 1 | 0 | 1 | 1 |
| E2R1B9     | HERV-H LTR-associating 1 OS=Canis lupus familiaris GN=HHLA1 PE=4 SV=2 - [E2R1B9_CANLF]                        | 1,4   | 1 | 0 | 1 | 1 |
| F1PVW0     | L-lactate dehydrogenase OS=Canis lupus familiaris GN=LOC476882 PE=3 SV=2 - [F1PVW0_CANLF]                     | 4,71  | 1 | 0 | 1 | 4 |
| J9P8V2     | HERV-H LTR-associating 1 OS=Canis lupus familiaris GN=HHLA1 PE=4 SV=1 - [J9P8V2_CANLF]                        | 1,34  | 1 | 0 | 1 | 1 |
| E2RA64     | L-lactate dehydrogenase OS=Canis lupus familiaris GN=LOC476882 PE=3 SV=2 - [E2RA64_CANLF]                     | 6,09  | 1 | 0 | 1 | 4 |
| Q95159     | Angiotensinogen (Fragment) OS=Canis lupus familiaris PE=2 SV=1 - [Q95159_CANLF]                               | 38,46 | 1 | 0 | 1 | 1 |
| Q95LE3     | Interleukin-10 (Fragment) OS=Canis lupus familiaris PE=2 SV=1 - [Q95LE3_CANLF]                                | 30,33 | 1 | 0 | 1 | 1 |
| Q28251     | Sex-determining region Y protein (Fragment) OS=Canis lupus familiaris GN=sry PE=3 SV=1 - [Q28251_CANLF]       | 29,09 | 1 | 0 | 1 | 1 |
| B0M0J2     | Interleukin 10 OS=Canis lupus familiaris PE=2 SV=1 - [B0M0J2_CANLF]                                           | 20,67 | 1 | 0 | 1 | 1 |
| F1PZ65     | Interleukin-10 OS=Canis lupus familiaris GN=IL10 PE=4 SV=1 - [F1PZ65_CANLF]                                   | 20,67 | 1 | 0 | 1 | 1 |
| P48411     | Interleukin-10 OS=Canis lupus familiaris GN=IL10 PE=2 SV=1 - [IL10_CANLF]                                     | 20,44 | 1 | 0 | 1 | 1 |
| Q643X2     | Protein kinase B (Fragment) OS=Canis lupus familiaris PE=2 SV=1 - [Q643X2_CANLF]                              | 20    | 1 | 0 | 1 | 1 |

|            |                                                                                                                   |       |   |   |   |   |
|------------|-------------------------------------------------------------------------------------------------------------------|-------|---|---|---|---|
| J9NSK3     | NANOG neighbor homeobox OS=Canis lupus familiaris GN=NANOGNB PE=4 SV=1 - [J9NSK3_CANLF]                           | 15,97 | 1 | 1 | 1 | 1 |
| F1PF97     | Retinitis pigmentosa 9 (autosomal dominant) OS=Canis lupus familiaris GN=RP9 PE=4 SV=2 - [F1PF97_CANLF]           | 10,9  | 1 | 0 | 1 | 2 |
| A0A0E3V455 | Uncharacterized protein OS=Pasteurella multocida subsp. multocida OH4807 GN=I926_04765 PE=4 SV=1 - [A0A0E3V455]   | 10,66 | 1 | 0 | 1 | 1 |
| L7N062     | Retinitis pigmentosa 9 (autosomal dominant) OS=Canis lupus familiaris GN=RP9 PE=4 SV=1 - [L7N062_CANLF]           | 10,45 | 1 | 1 | 1 | 2 |
| E2RSV6     | NudC domain containing 2 OS=Canis lupus familiaris GN=NUDC2 PE=4 SV=2 - [E2RSV6_CANLF]                            | 10,42 | 1 | 1 | 1 | 1 |
| A0A0E3ZPT6 | Uncharacterized protein OS=Pasteurella multocida subsp. multocida OH4807 GN=I926_06515 PE=4 SV=1 - [A0A0E3ZPT6]   | 9,47  | 1 | 1 | 1 | 1 |
| O62729     | Neuropeptide Y receptor type 5 OS=Canis lupus familiaris GN=NPY5R PE=2 SV=1 - [NPY5R_CANLF]                       | 9,42  | 1 | 1 | 1 | 1 |
| F1PQ93     | Stratifin OS=Canis lupus familiaris GN=SFN PE=3 SV=2 - [F1PQ93_CANLF]                                             | 8,87  | 1 | 1 | 1 | 2 |
| J9NXM6     | Nucleolar protein interacting with the FHA domain of MKI67 OS=Canis lupus familiaris GN=NIFK PE=4 SV=1 - [J9NXM6] | 8,42  | 1 | 0 | 1 | 1 |
| E2RHG8     | Nucleolar protein interacting with the FHA domain of MKI67 OS=Canis lupus familiaris GN=NIFK PE=4 SV=2 - [E2RHG8] | 8,36  | 1 | 0 | 1 | 1 |
| J9NV30     | Uncharacterized protein OS=Canis lupus familiaris PE=4 SV=1 - [J9NV30_CANLF]                                      | 7,48  | 1 | 1 | 1 | 1 |
| Q9XT60     | Sex-determining region Y protein OS=Canis lupus familiaris GN=SRY PE=3 SV=1 - [SRY_CANLF]                         | 7,27  | 1 | 0 | 1 | 1 |
| J9NWC1     | MOB kinase activator 2 OS=Canis lupus familiaris GN=MOB2 PE=4 SV=1 - [J9NWC1_CANLF]                               | 6,38  | 1 | 0 | 1 | 1 |
| P68280     | Alpha-crystallin A chain OS=Canis lupus familiaris GN=CRYAA PE=1 SV=1 - [CRYAA_CANLF]                             | 6,36  | 1 | 1 | 1 | 2 |
| E2R0N3     | Annexin OS=Canis lupus familiaris GN=ANXA3 PE=3 SV=1 - [E2R0N3_CANLF]                                             | 6,19  | 1 | 1 | 1 | 1 |
| F1PF62     | MOB kinase activator 2 OS=Canis lupus familiaris GN=MOB2 PE=4 SV=2 - [F1PF62_CANLF]                               | 5,64  | 1 | 0 | 1 | 1 |
| F6XJ18     | Mitochondrial ribosomal protein S31 OS=Canis lupus familiaris GN=MRPS31 PE=4 SV=1 - [F6XJ18_CANLF]                | 5,57  | 1 | 0 | 1 | 1 |
| F1PDH5     | Apolipoprotein A5 OS=Canis lupus familiaris GN=APOA5 PE=3 SV=1 - [F1PDH5_CANLF]                                   | 5,41  | 1 | 1 | 1 | 2 |
| E2RB38     | Tropomyosin 3 OS=Canis lupus familiaris GN=TPM3 PE=3 SV=2 - [E2RB38_CANLF]                                        | 5,24  | 1 | 0 | 1 | 1 |
| E2R9J7     | Mitochondrial ribosomal protein S31 OS=Canis lupus familiaris GN=MRPS31 PE=4 SV=2 - [E2R9J7_CANLF]                | 5     | 1 | 0 | 1 | 1 |
| J9PSD6     | Mitochondrial ribosomal protein S31 OS=Canis lupus familiaris GN=MRPS31 PE=4 SV=1 - [J9PSD6_CANLF]                | 4,92  | 1 | 0 | 1 | 1 |
| E2RBS0     | IKAROS family zinc finger 2 OS=Canis lupus familiaris GN=IKZF2 PE=4 SV=1 - [E2RBS0_CANLF]                         | 4,75  | 1 | 1 | 1 | 1 |
| A0A0E3ZPX3 | Coproporphyrinogen III oxidase OS=Pasteurella multocida subsp. multocida OH4807 GN=I926_02065 PE=4 SV=1           | 4,64  | 1 | 1 | 1 | 1 |
| Q4ZH50     | Guanylate cyclase soluble subunit alpha-3 OS=Canis lupus familiaris GN=GUCY1A3 PE=2 SV=1 - [GUCY1A3_CANLF]        | 4,64  | 1 | 0 | 1 | 1 |
| F1P649     | Guanylate cyclase soluble subunit alpha-3 OS=Canis lupus familiaris GN=GUCY1A3 PE=3 SV=1 - [F1P649_CANLF]         | 4,64  | 1 | 0 | 1 | 1 |
| A0A0N9J523 | Tropomyosin 3 gamma OS=Canis lupus familiaris GN=Tpm3 PE=2 SV=1 - [A0A0N9J523_CANLF]                              | 4,58  | 1 | 0 | 1 | 1 |
| E2RBW4     | Tropomyosin 3 OS=Canis lupus familiaris GN=TPM3 PE=3 SV=2 - [E2RBW4_CANLF]                                        | 4,56  | 1 | 0 | 1 | 1 |
| J9NTU0     | Uncharacterized protein OS=Canis lupus familiaris PE=3 SV=1 - [J9NTU0_CANLF]                                      | 4,36  | 1 | 0 | 1 | 1 |
| J9P1L8     | Uncharacterized protein OS=Canis lupus familiaris PE=3 SV=1 - [J9P1L8_CANLF]                                      | 4,36  | 1 | 0 | 1 | 1 |
| F1PBK4     | Lamin B1 OS=Canis lupus familiaris GN=LMNB1 PE=3 SV=2 - [F1PBK4_CANLF]                                            | 4,19  | 1 | 0 | 1 | 1 |
| F1PT35     | HECT domain E3 ubiquitin protein ligase 2 OS=Canis lupus familiaris GN=HECTD2 PE=4 SV=2 - [F1PT35_CANLF]          | 4,19  | 1 | 1 | 1 | 2 |
| J9P3G1     | Lamin B1 OS=Canis lupus familiaris GN=LMNB1 PE=3 SV=1 - [J9P3G1_CANLF]                                            | 4     | 1 | 0 | 1 | 1 |
| F1PPW9     | Thyroid hormone receptor beta OS=Canis lupus familiaris GN=THRB PE=3 SV=2 - [F1PPW9_CANLF]                        | 3,9   | 1 | 1 | 1 | 1 |
| F1Q3Y2     | Dihydropyrimidinase like 3 OS=Canis lupus familiaris GN=DPYSL3 PE=4 SV=2 - [F1Q3Y2_CANLF]                         | 3,86  | 1 | 1 | 1 | 1 |
| H9GWH6     | Uncharacterized protein OS=Canis lupus familiaris PE=4 SV=2 - [H9GWH6_CANLF]                                      | 3,78  | 1 | 0 | 1 | 1 |
| J9P620     | Uncharacterized protein OS=Canis lupus familiaris PE=4 SV=1 - [J9P620_CANLF]                                      | 3,67  | 1 | 1 | 1 | 1 |
| J9P545     | Ring finger protein 219 OS=Canis lupus familiaris GN=RNFP219 PE=4 SV=1 - [J9P545_CANLF]                           | 3,63  | 1 | 1 | 1 | 1 |
| Q5I9W4     | Protein kinase B (Fragment) OS=Canis lupus familiaris PE=2 SV=1 - [Q5I9W4_CANLF]                                  | 3,33  | 1 | 0 | 1 | 1 |
| F1PEE4     | Exportin 5 OS=Canis lupus familiaris GN=XPO5 PE=4 SV=2 - [F1PEE4_CANLF]                                           | 3,32  | 1 | 0 | 1 | 1 |
| F6XYR9     | CXXC finger protein 1 OS=Canis lupus familiaris GN=CXXC1 PE=4 SV=1 - [F6XYR9_CANLF]                               | 3,31  | 1 | 1 | 1 | 1 |
| Q5I9W5     | Protein kinase B OS=Canis lupus familiaris PE=2 SV=1 - [Q5I9W5_CANLF]                                             | 3,1   | 1 | 0 | 1 | 1 |
| J9P8X1     | Exportin 5 OS=Canis lupus familiaris GN=XPO5 PE=4 SV=1 - [J9P8X1_CANLF]                                           | 2,97  | 1 | 1 | 1 | 1 |
| F1PSA7     | AKT serine/threonine kinase 2 OS=Canis lupus familiaris GN=AKT2 PE=3 SV=2 - [F1PSA7_CANLF]                        | 2,91  | 1 | 0 | 1 | 1 |
| E2R5C6     | Neural precursor cell expressed, developmentally down-regulated 1 OS=Canis lupus familiaris GN=NEDD1 PE=4         | 2,86  | 1 | 1 | 1 | 1 |
| F1P8G4     | Fucosidase, alpha-L-2, plasma OS=Canis lupus familiaris GN=FUCA2 PE=4 SV=1 - [F1P8G4_CANLF]                       | 2,77  | 1 | 1 | 1 | 2 |
| E2RJX4     | AKT serine/threonine kinase 1 OS=Canis lupus familiaris GN=AKT1 PE=3 SV=1 - [E2RJX4_CANLF]                        | 2,71  | 1 | 0 | 1 | 1 |
| F1Q4F8     | AKT serine/threonine kinase 3 OS=Canis lupus familiaris GN=AKT3 PE=3 SV=2 - [F1Q4F8_CANLF]                        | 2,71  | 1 | 0 | 1 | 1 |
| F1PRG4     | AKT serine/threonine kinase 2 OS=Canis lupus familiaris GN=AKT2 PE=3 SV=1 - [F1PRG4_CANLF]                        | 2,7   | 1 | 0 | 1 | 1 |
| J9P8B2     | Uncharacterized protein OS=Canis lupus familiaris PE=4 SV=1 - [J9P8B2_CANLF]                                      | 2,62  | 1 | 0 | 1 | 1 |
| J9NRX1     | Uncharacterized protein OS=Canis lupus familiaris PE=4 SV=1 - [J9NRX1_CANLF]                                      | 2,61  | 1 | 0 | 1 | 1 |
| E2RB36     | Uncharacterized protein OS=Canis lupus familiaris PE=4 SV=2 - [E2RB36_CANLF]                                      | 2,57  | 1 | 0 | 1 | 1 |
| H9GWJ2     | Uncharacterized protein OS=Canis lupus familiaris PE=4 SV=2 - [H9GWJ2_CANLF]                                      | 2,56  | 1 | 0 | 1 | 1 |
| J9P2R2     | Uncharacterized protein OS=Canis lupus familiaris PE=4 SV=1 - [J9P2R2_CANLF]                                      | 2,56  | 1 | 0 | 1 | 1 |
| J9P6P3     | Uncharacterized protein OS=Canis lupus familiaris PE=4 SV=1 - [J9P6P3_CANLF]                                      | 2,56  | 1 | 0 | 1 | 1 |
| E2R4V0     | SET and MYND domain containing 4 OS=Canis lupus familiaris GN=SMYD4 PE=4 SV=1 - [E2R4V0_CANLF]                    | 2,52  | 1 | 0 | 1 | 1 |
| J9NYI0     | SET and MYND domain containing 4 OS=Canis lupus familiaris GN=SMYD4 PE=4 SV=1 - [J9NYI0_CANLF]                    | 2,48  | 1 | 0 | 1 | 1 |
| F1PYW3     | Neural precursor cell expressed, developmentally down-regulated 4, E3 ubiquitin protein ligase OS=Canis lupus     | 2,27  | 1 | 1 | 1 | 1 |
| F1PMG0     | Integrin beta OS=Canis lupus familiaris GN=ITGB7 PE=3 SV=2 - [F1PMG0_CANLF]                                       | 2,26  | 1 | 1 | 1 | 1 |
| F1PKP8     | Leucine rich repeat LG1 family member 4 OS=Canis lupus familiaris GN=LG1A PE=4 SV=2 - [F1PKP8_CANLF]              | 2,25  | 1 | 1 | 1 | 2 |
| A0A0E3V4L4 | Protein TadG OS=Pasteurella multocida subsp. multocida OH4807 GN=I926_09475 PE=4 SV=1 - [A0A0E3V4L4]              | 2,16  | 1 | 1 | 1 | 2 |
| E2QX80     | Ring finger protein 14 OS=Canis lupus familiaris GN=RNFP14 PE=3 SV=1 - [E2QX80_CANLF]                             | 2,11  | 1 | 1 | 1 | 1 |
| J9P7Y3     | Fms related tyrosine kinase 3 OS=Canis lupus familiaris GN=FLT3 PE=3 SV=1 - [J9P7Y3_CANLF]                        | 1,95  | 1 | 0 | 1 | 1 |
| F1PKV4     | Fms related tyrosine kinase 3 OS=Canis lupus familiaris GN=FLT3 PE=3 SV=2 - [F1PKV4_CANLF]                        | 1,91  | 1 | 0 | 1 | 1 |
| J9P9L5     | Fms related tyrosine kinase 3 OS=Canis lupus familiaris GN=FLT3 PE=3 SV=1 - [J9P9L5_CANLF]                        | 1,91  | 1 | 0 | 1 | 1 |
| Q4ZHV8     | Flt3 OS=Canis lupus familiaris GN=Flt3 PE=2 SV=1 - [Q4ZHV8_CANLF]                                                 | 1,91  | 1 | 0 | 1 | 1 |
| F1Q2J3     | Solute carrier family 12 member 6 OS=Canis lupus familiaris GN=SLC12A6 PE=4 SV=2 - [F1Q2J3_CANLF]                 | 1,82  | 1 | 1 | 1 | 1 |
| F1PV47     | RAS protein activator like 2 OS=Canis lupus familiaris GN=RASAL2 PE=4 SV=2 - [F1PV47_CANLF]                       | 1,8   | 1 | 1 | 1 | 1 |
| J9P3H7     | Regulator of solute carriers 1 OS=Canis lupus familiaris GN=RSC1A1 PE=4 SV=1 - [J9P3H7_CANLF]                     | 1,78  | 1 | 1 | 1 | 1 |
| X5KCU7     | CYP2D15 OS=Canis lupus familiaris GN=Cytochrome-P450-2D15 PE=2 SV=1 - [X5KCU7_CANLF]                              | 1,78  | 1 | 0 | 1 | 1 |
| X5KNV4     | CYP2D15 OS=Canis lupus familiaris GN=Cytochrome-P450-2D15 PE=2 SV=1 - [X5KNV4_CANLF]                              | 1,78  | 1 | 0 | 1 | 1 |
| X5KNV9     | CYP2D15 OS=Canis lupus familiaris GN=Cytochrome-P450-2D15 PE=2 SV=1 - [X5KNV9_CANLF]                              | 1,78  | 1 | 0 | 1 | 1 |
| F1PHX8     | Collagen type V alpha 1 chain OS=Canis lupus familiaris GN=COL5A1 PE=4 SV=2 - [F1PHX8_CANLF]                      | 1,65  | 1 | 1 | 1 | 1 |
| Q29473     | Cytochrome P450 2D15 OS=Canis lupus familiaris GN=CYP2D15 PE=1 SV=3 - [CP2DF_CANLF]                               | 1,6   | 1 | 0 | 1 | 1 |
| X5KJ2      | CYP2D15 OS=Canis lupus familiaris GN=Cytochrome-P450-2D15 PE=2 SV=1 - [X5KJ2_CANLF]                               | 1,6   | 1 | 0 | 1 | 1 |
| X5KJ2      | CYP2D15 OS=Canis lupus familiaris GN=Cytochrome-P450-2D15 PE=2 SV=1 - [X5KJ2_CANLF]                               | 1,6   | 1 | 0 | 1 | 1 |
| X5KNW5     | Cytochrome-P450-2D15 OS=Canis lupus familiaris GN=CYP2D15 PE=2 SV=1 - [X5KNW5_CANLF]                              | 1,6   | 1 | 0 | 1 | 1 |
| X5L1N0     | CYP2D15 OS=Canis lupus familiaris GN=Cytochrome-P450-2D15 PE=2 SV=1 - [X5L1N0_CANLF]                              | 1,6   | 1 | 0 | 1 | 1 |
| X5L571     | CYP2D15 OS=Canis lupus familiaris GN=Cytochrome-P450-2D15 PE=2 SV=1 - [X5L571_CANLF]                              | 1,6   | 1 | 0 | 1 | 1 |
| X5L576     | CYP2D15 OS=Canis lupus familiaris GN=Cytochrome-P450-2D15 PE=2 SV=1 - [X5L576_CANLF]                              | 1,6   | 1 | 0 | 1 | 1 |
| E2RIJ2     | Phosphatidylinositol transfer protein membrane associated 2 OS=Canis lupus familiaris GN=PITPNM2 PE=4 SV=1        | 1,58  | 1 | 1 | 1 | 1 |
| E2RIJ2     | Glutamate metabotropic receptor 5 OS=Canis lupus familiaris GN=GRM5 PE=3 SV=1 - [E2RIJ2_CANLF]                    | 1,56  | 1 | 0 | 1 | 1 |
| J9IH96     | Glutamate metabotropic receptor 5 OS=Canis lupus familiaris GN=GRM5 PE=3 SV=1 - [J9IH96_CANLF]                    | 1,53  | 1 | 0 | 1 | 1 |
| E2QW14     | Neurochondrin OS=Canis lupus familiaris GN=NCDN PE=4 SV=2 - [E2QW14_CANLF]                                        | 1,51  | 1 | 1 | 1 | 2 |
| F1PND2     | Fanconi anemia group C protein homolog OS=Canis lupus familiaris GN=FAHCC PE=4 SV=2 - [F1PND2_CANLF]              | 1,5   | 1 | 0 | 1 | 4 |
| F1PZ45     | Evc ciliary complex subunit 2 OS=Canis lupus familiaris GN=EVC2 PE=4 SV=2 - [F1PZ45_CANLF]                        | 1,49  | 1 | 1 | 1 | 1 |
| F1PHQ5     | FERM domain containing 3 OS=Canis lupus familiaris GN=FRMD3 PE=4 SV=2 - [F1PHQ5_CANLF]                            | 1,48  | 1 | 1 | 1 | 1 |
| J9P077     | Ankyrin repeat domain 12 OS=Canis lupus familiaris GN=ANKRD12 PE=4 SV=1 - [J9P077_CANLF]                          | 1,47  | 1 | 0 | 1 | 1 |
| F1PYP5     | Tyrosine-protein kinase receptor OS=Canis lupus familiaris GN=NTRK3 PE=3 SV=2 - [F1PYP5_CANLF]                    | 1,47  | 1 | 0 | 1 | 2 |
| E2QVNO     | Ankyrin repeat domain 12 OS=Canis lupus familiaris GN=ANKRD12 PE=4 SV=1 - [E2QVNO_CANLF]                          | 1,46  | 1 | 0 | 1 | 1 |
| J9PAA8     | Baculoviral IAP repeat containing 6 OS=Canis lupus familiaris GN=BIRC6 PE=4 SV=1 - [J9PAA8_CANLF]                 | 1,46  | 1 | 0 | 1 | 1 |
| F1PQE3     | ADP ribosylation factor like GTPase 13B OS=Canis lupus familiaris GN=ARL13B PE=3 SV=2 - [F1PQE3_CANLF]            | 1,4   | 1 | 0 | 1 | 1 |
| F1PAN1     | Tubby like protein 2 OS=Canis lupus familiaris GN=TULP2 PE=3 SV=2 - [F1PAN1_CANLF]                                | 1,37  | 1 | 0 | 1 | 1 |
| F1PZY5     | Phosphatidylinositol-4-phosphate 5-kinase type 1 gamma OS=Canis lupus familiaris GN=PIP5K1C PE=4 SV=2 - [F1PZY5]  | 1,3   | 1 | 1 | 1 | 1 |

|        |                                                                                                                                 |       |   |   |   |   |
|--------|---------------------------------------------------------------------------------------------------------------------------------|-------|---|---|---|---|
| F1PTE4 | Collagen type XXII alpha 1 chain OS=Canis lupus familiaris GN=COL22A1 PE=4 SV=2 - [F1PTE4_CANLF]                                | 1,29  | 1 | 1 | 1 | 3 |
| F1PHA7 | Fanconi anemia complementation group C OS=Canis lupus familiaris GN=FNCC PE=4 SV=2 - [F1PHA7_CANLF]                             | 1,16  | 1 | 0 | 1 | 4 |
| F1PND8 | Tetrapeptide repeat, ankyrin repeat and coiled-coil containing 1 OS=Canis lupus familiaris GN=TANCI1 PE=4 SV=2 - [F1PND8_CANLF] | 1,15  | 1 | 1 | 1 | 2 |
| E2RSD6 | Ski2 like RNA helicase OS=Canis lupus familiaris GN=SKI2V2L PE=4 SV=1 - [E2RSD6_CANLF]                                          | 1,12  | 1 | 1 | 1 | 1 |
| E2RKA1 | Tyrosine-protein kinase receptor OS=Canis lupus familiaris GN=NTRK2 PE=3 SV=2 - [E2RKA1_CANLF]                                  | 1,09  | 1 | 0 | 1 | 2 |
| F1PIY4 | Calcium voltage-gated channel auxiliary subunit alpha2delta 2 OS=Canis lupus familiaris GN=CACNA2D2 PE=4 SV=2 - [F1PIY4_CANLF]  | 1,08  | 1 | 0 | 1 | 1 |
| J9P579 | Calcium voltage-gated channel auxiliary subunit alpha2delta 2 OS=Canis lupus familiaris GN=CACNA2D2 PE=4 SV=2 - [J9P579_CANLF]  | 1,08  | 1 | 0 | 1 | 1 |
| F1PEA8 | Inositol polyphosphate-5-phosphatase D OS=Canis lupus familiaris GN=INPP5D PE=4 SV=2 - [F1PEA8_CANLF]                           | 1,05  | 1 | 1 | 1 | 1 |
| J9P2Q9 | Zinc fingers and homeobox 1 OS=Canis lupus familiaris GN=ZHX1 PE=4 SV=1 - [J9P2Q9_CANLF]                                        | 1,03  | 1 | 1 | 1 | 1 |
| F1PAY7 | Sorbin and SH3 domain containing 1 OS=Canis lupus familiaris GN=SORBS1 PE=4 SV=2 - [F1PAY7_CANLF]                               | 0,93  | 1 | 1 | 1 | 1 |
| J9P3Q0 | Ubiquitin specific peptidase 25 OS=Canis lupus familiaris GN=USP25 PE=3 SV=1 - [J9P3Q0_CANLF]                                   | 0,85  | 1 | 0 | 1 | 1 |
| E2QW53 | Ubiquitin specific peptidase 25 OS=Canis lupus familiaris GN=USP25 PE=3 SV=2 - [E2QW53_CANLF]                                   | 0,83  | 1 | 0 | 1 | 1 |
| F1P8K4 | Phospholipase B1 OS=Canis lupus familiaris GN=PLB1 PE=4 SV=1 - [F1P8K4_CANLF]                                                   | 0,82  | 1 | 1 | 1 | 1 |
| F1PBI9 | Uncharacterized protein OS=Canis lupus familiaris PE=3 SV=2 - [F1PBI9_CANLF]                                                    | 0,81  | 1 | 1 | 1 | 1 |
| J9PA48 | Ubiquitin specific peptidase 25 OS=Canis lupus familiaris GN=USP25 PE=3 SV=1 - [J9PA48_CANLF]                                   | 0,8   | 1 | 0 | 1 | 1 |
| F1P9S3 | Myosin binding protein C, cardiac OS=Canis lupus familiaris GN=MYBPC3 PE=4 SV=2 - [F1P9S3_CANLF]                                | 0,71  | 1 | 0 | 1 | 1 |
| Q2Q1P6 | Cardiac myosin binding protein C OS=Canis lupus familiaris PE=2 SV=1 - [Q2Q1P6_CANLF]                                           | 0,71  | 1 | 0 | 1 | 1 |
| J9P3T7 | Myosin binding protein C, cardiac OS=Canis lupus familiaris GN=MYBPC3 PE=4 SV=1 - [J9P3T7_CANLF]                                | 0,7   | 1 | 0 | 1 | 1 |
| F1PMI5 | Coiled-coil domain containing 88C OS=Canis lupus familiaris GN=CCDC88C PE=4 SV=2 - [F1PMI5_CANLF]                               | 0,65  | 1 | 1 | 1 | 1 |
| F1PIT6 | Forkhead associated phosphopeptide binding domain 1 OS=Canis lupus familiaris GN=FHAD1 PE=4 SV=2 - [F1PIT6_CANLF]               | 0,63  | 1 | 0 | 1 | 3 |
| F1PA81 | RAN binding protein 2 OS=Canis lupus familiaris GN=RANBP2 PE=4 SV=2 - [F1PA81_CANLF]                                            | 0,62  | 1 | 1 | 1 | 2 |
| L7N0H2 | Forkhead associated phosphopeptide binding domain 1 OS=Canis lupus familiaris GN=FHAD1 PE=4 SV=1 - [L7N0H2_CANLF]               | 0,61  | 1 | 0 | 1 | 3 |
| E2RRT5 | Mediator complex subunit 12 OS=Canis lupus familiaris GN=MED12 PE=4 SV=2 - [E2RRT5_CANLF]                                       | 0,6   | 1 | 0 | 1 | 1 |
| J9PAD2 | Mediator complex subunit 12 OS=Canis lupus familiaris GN=MED12 PE=4 SV=1 - [J9PAD2_CANLF]                                       | 0,6   | 1 | 0 | 1 | 1 |
| F1PGY9 | Uncharacterized protein OS=Canis lupus familiaris GN=DYNC1H1 PE=4 SV=2 - [F1PGY9_CANLF]                                         | 0,6   | 1 | 1 | 1 | 1 |
| F1PQK5 | Uncharacterized protein OS=Canis lupus familiaris PE=4 SV=2 - [F1PQK5_CANLF]                                                    | 0,58  | 1 | 0 | 1 | 1 |
| E2QXC0 | Nuclear receptor coactivator 2 OS=Canis lupus familiaris GN=NCOA2 PE=4 SV=2 - [E2QXC0_CANLF]                                    | 0,55  | 1 | 0 | 1 | 1 |
| E2QY25 | Nuclear receptor coactivator 2 OS=Canis lupus familiaris GN=NCOA2 PE=4 SV=1 - [E2QY25_CANLF]                                    | 0,55  | 1 | 0 | 1 | 1 |
| F1Q4D5 | DNA polymerase epsilon, catalytic subunit OS=Canis lupus familiaris GN=POLE PE=4 SV=2 - [F1Q4D5_CANLF]                          | 0,49  | 1 | 1 | 1 | 1 |
| F1Q074 | A-kinase anchoring protein 13 OS=Canis lupus familiaris GN=AKAP13 PE=4 SV=2 - [F1Q074_CANLF]                                    | 0,47  | 1 | 1 | 1 | 1 |
| A2VEC8 | SCO-spondin OS=Canis lupus familiaris GN=SSPO PE=4 SV=1 - [A2VEC8_CANLF]                                                        | 0,27  | 1 | 0 | 1 | 2 |
| F1PLT3 | SCO-spondin OS=Canis lupus familiaris GN=SSPO PE=4 SV=2 - [F1PLT3_CANLF]                                                        | 0,27  | 1 | 0 | 1 | 2 |
| J9P3R7 | SCO-spondin OS=Canis lupus familiaris GN=SSPO PE=4 SV=1 - [J9P3R7_CANLF]                                                        | 0,27  | 1 | 0 | 1 | 2 |
| J9P6N7 | Uncharacterized protein OS=Canis lupus familiaris PE=4 SV=1 - [J9P6N7_CANLF]                                                    | 33,9  | 1 | 1 | 1 | 1 |
| C6GJL5 | VP2 (Fragment) OS=Canine parvovirus type 2 GN=VP2 PE=4 SV=1 - [C6GJL5_PAVC]                                                     | 18,34 | 1 | 1 | 1 | 1 |
| J9P1T5 | Phospholipase A2 group XIIB OS=Canis lupus familiaris GN=PLA2G12B PE=4 SV=1 - [J9P1T5_CANLF]                                    | 12,31 | 1 | 1 | 1 | 2 |
| Q65AS0 | RIM ABC transporter (Fragment) OS=Canis lupus familiaris GN=abca4 PE=4 SV=1 - [Q65AS0_CANLF]                                    | 10,16 | 1 | 0 | 1 | 1 |
| Q4GX49 | Zinc alpha-2-glycoprotein 1 (Fragment) OS=Canis lupus familiaris GN=azgp1 PE=2 SV=1 - [Q4GX49_CANLF]                            | 9,25  | 1 | 1 | 1 | 1 |
| P33712 | Insulin-like growth factor I OS=Canis lupus familiaris GN=IGF1 PE=2 SV=2 - [IGF1_CANLF]                                         | 9,15  | 1 | 0 | 1 | 1 |
| E2RKF7 | Ring finger protein 224 OS=Canis lupus familiaris GN=RNFB224 PE=4 SV=2 - [E2RKF7_CANLF]                                         | 7,89  | 1 | 1 | 1 | 2 |
| E2R442 | Insulin-like growth factor I OS=Canis lupus familiaris GN=IGF1 PE=3 SV=1 - [E2R442_CANLF]                                       | 7,49  | 1 | 0 | 1 | 1 |
| F1P774 | Cytokine receptor like factor 1 OS=Canis lupus familiaris GN=CRLF1 PE=4 SV=2 - [F1P774_CANLF]                                   | 5,19  | 1 | 1 | 1 | 1 |
| E2RAG4 | MACRO domain containing 1 OS=Canis lupus familiaris GN=MACROD1 PE=4 SV=2 - [E2RAG4_CANLF]                                       | 4,32  | 1 | 0 | 1 | 1 |
| E2QU14 | Exoribonuclease 1 OS=Canis lupus familiaris GN=ERI1 PE=4 SV=1 - [E2QU14_CANLF]                                                  | 4,3   | 1 | 0 | 1 | 2 |
| J9P0Q0 | MACRO domain containing 1 OS=Canis lupus familiaris GN=MACROD1 PE=4 SV=1 - [J9P0Q0_CANLF]                                       | 4,28  | 1 | 0 | 1 | 1 |
| F1PM35 | Glypican 4 OS=Canis lupus familiaris GN=GPC4 PE=3 SV=2 - [F1PM35_CANLF]                                                         | 3,96  | 1 | 1 | 1 | 1 |
| E2R8D5 | Protein phosphatase, Mg2+/Mn2+ dependent 1H OS=Canis lupus familiaris GN=PPM1H PE=4 SV=1 - [E2R8D5_CANLF]                       | 3,7   | 1 | 1 | 1 | 2 |
| F6ULS6 | DALR anticodon binding domain containing 3 OS=Canis lupus familiaris GN=DALRD3 PE=4 SV=1 - [F6ULS6_CANLF]                       | 3,14  | 1 | 1 | 1 | 1 |
| E2RBA5 | Chloride channel accessory 1 OS=Canis lupus familiaris GN=CLCA1 PE=4 SV=2 - [E2RBA5_CANLF]                                      | 2,96  | 1 | 1 | 1 | 2 |
| E2RSE6 | Furin, paired basic amino acid cleaving enzyme OS=Canis lupus familiaris GN=FURIN PE=3 SV=1 - [E2RSE6_CANLF]                    | 2,9   | 1 | 1 | 1 | 1 |
| J9PAA1 | Uncharacterized protein OS=Canis lupus familiaris PE=3 SV=1 - [J9PAA1_CANLF]                                                    | 2,88  | 1 | 0 | 1 | 1 |
| E2RJZ5 | Secernin 3 OS=Canis lupus familiaris GN=SCRN3 PE=4 SV=2 - [E2RJZ5_CANLF]                                                        | 2,84  | 1 | 1 | 1 | 1 |
| J9PBM0 | MCF.2 cell line derived transforming sequence OS=Canis lupus familiaris GN=MCF2 PE=4 SV=1 - [J9PBM0_CANLF]                      | 2,74  | 1 | 0 | 1 | 1 |
| E2RT67 | ADAM metalloproteinase domain 7 OS=Canis lupus familiaris GN=ADAM7 PE=4 SV=1 - [E2RT67_CANLF]                                   | 2,52  | 1 | 1 | 1 | 1 |
| F1Q2N1 | Unc-5 netrin receptor D OS=Canis lupus familiaris GN=UNC5D PE=4 SV=2 - [F1Q2N1_CANLF]                                           | 2,29  | 1 | 1 | 1 | 1 |
| F1PNY6 | Transient receptor potential cation channel subfamily C member 6 OS=Canis lupus familiaris GN=TRPC6 PE=3 SV=2 - [F1PNY6_CANLF]  | 2,13  | 1 | 1 | 1 | 2 |
| F1Q3K9 | AUTS2, activator of transcription and developmental regulator OS=Canis lupus familiaris GN=AUTS2 PE=4 SV=2 - [F1Q3K9_CANLF]     | 1,65  | 1 | 1 | 1 | 2 |
| J9JHK5 | Uncharacterized protein OS=Canis lupus familiaris PE=4 SV=1 - [J9JHK5_CANLF]                                                    | 1,58  | 1 | 1 | 1 | 1 |
| F1Q280 | FYVE, RhoGEF and PH domain containing 6 OS=Canis lupus familiaris GN=FGD6 PE=4 SV=1 - [F1Q280_CANLF]                            | 1,55  | 1 | 0 | 1 | 1 |
| J9NYT0 | FYVE, RhoGEF and PH domain containing 6 OS=Canis lupus familiaris GN=FGD6 PE=4 SV=1 - [J9NYT0_CANLF]                            | 1,55  | 1 | 0 | 1 | 1 |
| E2RN66 | Neuronal PAS domain protein 4 OS=Canis lupus familiaris GN=NPAS4 PE=4 SV=2 - [E2RN66_CANLF]                                     | 1,38  | 1 | 1 | 1 | 1 |
| F1PX82 | MCF.2 cell line derived transforming sequence OS=Canis lupus familiaris GN=MCF2 PE=4 SV=2 - [F1PX82_CANLF]                      | 1,35  | 1 | 0 | 1 | 1 |
| E2RRM8 | Fer-1 like family member 6 OS=Canis lupus familiaris GN=FER1L6 PE=4 SV=2 - [E2RRM8_CANLF]                                       | 1,29  | 1 | 0 | 1 | 1 |
| J9P6N0 | Fer-1 like family member 6 OS=Canis lupus familiaris GN=FER1L6 PE=4 SV=1 - [J9P6N0_CANLF]                                       | 1,28  | 1 | 0 | 1 | 1 |
| F1PH90 | Methylenetetrahydrofolate dehydrogenase (NADP+ dependent) 1 like OS=Canis lupus familiaris GN=MTHFD1L                           | 1,27  | 1 | 1 | 1 | 1 |
| F1PQV2 | Lysine demethylase 3B OS=Canis lupus familiaris GN=KDM3B PE=4 SV=2 - [F1PQV2_CANLF]                                             | 1,25  | 1 | 1 | 1 | 1 |
| F1P8K1 | Uncharacterized protein OS=Canis lupus familiaris GN=HNRNPUL2 PE=4 SV=2 - [F1P8K1_CANLF]                                        | 1,07  | 1 | 1 | 1 | 1 |
| J9PAS2 | Uncharacterized protein OS=Canis lupus familiaris GN=HNRNPUL2 PE=4 SV=1 - [J9PAS2_CANLF]                                        | 1,05  | 1 | 0 | 1 | 1 |
| F1PD76 | TOPBP1 interacting checkpoint and replication regulator OS=Canis lupus familiaris GN=TICRR PE=4 SV=2 - [F1PD76_CANLF]           | 1,01  | 1 | 1 | 1 | 1 |
| F6VA50 | Nestin OS=Canis lupus familiaris GN=NES PE=3 SV=1 - [F6VA50_CANLF]                                                              | 1     | 1 | 1 | 1 | 1 |
| E2RJB0 | Centromere protein I OS=Canis lupus familiaris GN=CENPI PE=4 SV=1 - [E2RJB0_CANLF]                                              | 0,94  | 1 | 0 | 1 | 1 |
| F1PBJ0 | Rap guanine nucleotide exchange factor 2 OS=Canis lupus familiaris GN=RAPGEF2 PE=1 SV=2 - [F1PBJ0_CANLF]                        | 0,73  | 1 | 1 | 1 | 1 |
| J9P747 | Uncharacterized protein OS=Canis lupus familiaris GN=ABCA4 PE=4 SV=1 - [J9P747_CANLF]                                           | 0,61  | 1 | 0 | 1 | 1 |
| F1P7E4 | Uncharacterized protein OS=Canis lupus familiaris GN=ABCA4 PE=4 SV=2 - [F1P7E4_CANLF]                                           | 0,57  | 1 | 0 | 1 | 1 |
| F1PWT8 | Uncharacterized protein OS=Canis lupus familiaris GN=ABCA4 PE=4 SV=2 - [F1PWT8_CANLF]                                           | 0,57  | 1 | 0 | 1 | 1 |
| Q5ZGW1 | Retinal-specific ATP-binding cassette transporter OS=Canis lupus familiaris GN=abcr PE=2 SV=1 - [Q5ZGW1_CANLF]                  | 0,57  | 1 | 0 | 1 | 1 |
| Q6T940 | ABCA4 OS=Canis lupus familiaris PE=2 SV=1 - [Q6T940_CANLF]                                                                      | 0,57  | 1 | 0 | 1 | 1 |
| Q6T941 | ABCA4 OS=Canis lupus familiaris PE=2 SV=1 - [Q6T941_CANLF]                                                                      | 0,57  | 1 | 0 | 1 | 1 |
| Q6T942 | ABCA4 OS=Canis lupus familiaris PE=2 SV=1 - [Q6T942_CANLF]                                                                      | 0,57  | 1 | 0 | 1 | 1 |
| E2R8M8 | Host cell factor C1 regulator 1 OS=Canis lupus familiaris GN=HCFC1R1 PE=4 SV=2 - [E2R8M8_CANLF]                                 | 16,67 | 1 | 0 | 1 | 2 |
| E2R8M7 | Host cell factor C1 regulator 1 OS=Canis lupus familiaris GN=HCFC1R1 PE=4 SV=2 - [E2R8M7_CANLF]                                 | 16,55 | 1 | 0 | 1 | 2 |
| J9NSU9 | Uncharacterized protein OS=Canis lupus familiaris GN=PSMD9 PE=4 SV=1 - [J9NSU9_CANLF]                                           | 14,42 | 1 | 0 | 1 | 1 |
| E2R0R1 | Uncharacterized protein OS=Canis lupus familiaris GN=PSMD9 PE=4 SV=2 - [E2R0R1_CANLF]                                           | 13,9  | 1 | 0 | 1 | 1 |
| E2RCA4 | Uncharacterized protein OS=Canis lupus familiaris PE=4 SV=2 - [E2RCA4_CANLF]                                                    | 11,81 | 1 | 1 | 1 | 1 |
| F1PYI3 | 2',3'-cyclic-nucleotide 3'-phosphodiesterase OS=Canis lupus familiaris GN=CNP PE=3 SV=2 - [F1PYI3_CANLF]                        | 7,14  | 1 | 1 | 1 | 1 |
| E2RDY4 | NK3 homeobox 2 OS=Canis lupus familiaris GN=NKX3-2 PE=4 SV=1 - [E2RDY4_CANLF]                                                   | 6,91  | 1 | 1 | 1 | 1 |
| J9P9J7 | Uncharacterized protein OS=Canis lupus familiaris PE=4 SV=1 - [J9P9J7_CANLF]                                                    | 5,9   | 1 | 1 | 1 | 2 |
| E2R8U4 | Dynein axonemal assembly factor 4 OS=Canis lupus familiaris GN=DNAAF4 PE=4 SV=2 - [E2R8U4_CANLF]                                | 5,71  | 1 | 1 | 1 | 1 |
| J9P065 | Lysine acetyltransferase 2B OS=Canis lupus familiaris GN=KAT2B PE=4 SV=1 - [J9P065_CANLF]                                       | 4,63  | 1 | 1 | 1 | 1 |
| Q2HNR1 | Collagen type X alpha 1 (Fragment) OS=Canis lupus familiaris GN=COL10A1 PE=4 SV=1 - [Q2HNR1_CANLF]                              | 4,33  | 1 | 0 | 1 | 1 |
| J9P117 | Collagen type X alpha 1 chain OS=Canis lupus familiaris GN=COL10A1 PE=4 SV=1 - [J9P117_CANLF]                                   | 3,99  | 1 | 0 | 1 | 1 |
| B6SA15 | NSP3 protein OS=Rotavirus A (isolate RVA/Dog/United States/K9/1981/G3P5A[3]) GN=NSP3 PE=4 SV=1 - [B6SA15_CANLF]                 | 3,83  | 1 | 0 | 1 | 1 |
| B6SAK4 | NSP3 protein OS=Rotavirus A (isolate RVA/Dog/United States/Cu-1/1982/G3P5A[3]) GN=NSP3 PE=4 SV=1 - [B6SAK4_CANLF]               | 3,83  | 1 | 0 | 1 | 1 |

|            |                                                                                                                                |       |   |   |   |   |
|------------|--------------------------------------------------------------------------------------------------------------------------------|-------|---|---|---|---|
| F1PN31     | Lysine acetyltransferase 2B OS=Canis lupus familiaris GN=KAT2B PE=4 SV=1 - [F1PN31_CANLF]                                      | 3,65  | 1 | 0 | 1 | 1 |
| F1Q0I3     | Dpy-19 like 2 OS=Canis lupus familiaris GN=DPY19L2 PE=4 SV=2 - [F1Q0I3_CANLF]                                                  | 3,62  | 1 | 1 | 1 | 1 |
| F1P637     | Ligand dependent nuclear receptor corepressor like OS=Canis lupus familiaris GN=LORL PE=4 SV=1 - [F1P637_CANLF]                | 3,58  | 1 | 1 | 1 | 1 |
| E2QW54     | LIM domain and actin binding 1 OS=Canis lupus familiaris GN=LIMA1 PE=4 SV=2 - [E2QW54_CANLF]                                   | 3,54  | 1 | 1 | 1 | 1 |
| P61010     | Signal recognition particle 54 kDa protein OS=Canis lupus familiaris GN=SRP54 PE=1 SV=1 - [SRP54_CANLF]                        | 3,37  | 1 | 1 | 1 | 1 |
| E2RLW5     | Uncharacterized protein OS=Canis lupus familiaris GN=CCDC124 PE=4 SV=1 - [E2RLW5_CANLF]                                        | 3,14  | 1 | 0 | 1 | 1 |
| J9NWZ8     | Asparagine synthetase domain containing 1 OS=Canis lupus familiaris GN=ASNSD1 PE=4 SV=1 - [J9NWZ8_CANLF]                       | 2,92  | 1 | 0 | 1 | 1 |
| J9PAR9     | Pappalysin 2 OS=Canis lupus familiaris GN=PAPPA2 PE=4 SV=1 - [J9PAR9_CANLF]                                                    | 2,77  | 1 | 1 | 1 | 1 |
| A0A0E3ZR95 | Putative serine protease OS=Pasteurella multocida subsp. multocida OH4807 GN=I926_06150 PE=4 SV=1 - [A0A0E3ZR95_CANLF]         | 2,69  | 1 | 1 | 1 | 1 |
| E2RFA3     | RNA helicase OS=Canis lupus familiaris GN=DDX18 PE=3 SV=2 - [E2RFA3_CANLF]                                                     | 2,69  | 1 | 0 | 1 | 1 |
| E2REQ1     | Asparagine synthetase domain containing 1 OS=Canis lupus familiaris GN=ASNSD1 PE=4 SV=1 - [E2REQ1_CANLF]                       | 2,66  | 1 | 0 | 1 | 1 |
| F1Q3U4     | Uncharacterized protein OS=Canis lupus familiaris PE=4 SV=2 - [F1Q3U4_CANLF]                                                   | 2,64  | 1 | 0 | 1 | 1 |
| E2RPN4     | Solute carrier family 22 member 10 OS=Canis lupus familiaris GN=SLC22A10 PE=4 SV=2 - [E2RPN4_CANLF]                            | 2,5   | 1 | 1 | 1 | 1 |
| F1Q342     | Uncharacterized protein OS=Canis lupus familiaris PE=4 SV=1 - [F1Q342_CANLF]                                                   | 2,45  | 1 | 0 | 1 | 1 |
| F1PB46     | Uncharacterized protein OS=Canis lupus familiaris PE=4 SV=2 - [F1PB46_CANLF]                                                   | 2,38  | 1 | 0 | 1 | 1 |
| E2QWQ5     | Solute carrier family 25 member 23 OS=Canis lupus familiaris GN=SLC25A23 PE=3 SV=2 - [E2QWQ5_CANLF]                            | 2,16  | 1 | 1 | 1 | 1 |
| F1PNG6     | Pappalysin 2 OS=Canis lupus familiaris GN=PAPPA2 PE=4 SV=2 - [F1PNG6_CANLF]                                                    | 1,96  | 1 | 0 | 1 | 1 |
| E2RRE3     | HP55, biogenesis of lysosomal organelles complex 2 subunit 2 OS=Canis lupus familiaris GN=HP55 PE=4 SV=2 - [E2RRE3_CANLF]      | 1,77  | 1 | 1 | 1 | 1 |
| Q6E7G6     | Receptor protein-tyrosine kinase (Fragment) OS=Canis lupus familiaris GN=PDGFRA PE=2 SV=2 - [Q6E7G6_CANLF]                     | 1,76  | 1 | 1 | 1 | 1 |
| J9P815     | Uncharacterized protein OS=Canis lupus familiaris PE=4 SV=1 - [J9P815_CANLF]                                                   | 1,61  | 1 | 0 | 1 | 1 |
| E2RHM1     | GEM interacting protein OS=Canis lupus familiaris GN=GMIP PE=4 SV=2 - [E2RHM1_CANLF]                                           | 1,34  | 1 | 0 | 1 | 1 |
| J9P1X5     | GEM interacting protein OS=Canis lupus familiaris GN=GMIP PE=4 SV=1 - [J9P1X5_CANLF]                                           | 1,34  | 1 | 0 | 1 | 1 |
| F1P9P3     | POZ/BTB and AT hook containing zinc finger 1 OS=Canis lupus familiaris GN=PATZ1 PE=4 SV=1 - [F1P9P3_CANLF]                     | 1,23  | 1 | 0 | 1 | 1 |
| E2RCK9     | Peroxisomal biogenesis factor 1 OS=Canis lupus familiaris GN=PEX1 PE=4 SV=2 - [E2RCK9_CANLF]                                   | 1,2   | 1 | 1 | 1 | 1 |
| F1PZ30     | SET binding factor 2 OS=Canis lupus familiaris GN=SBF2 PE=3 SV=2 - [F1PZ30_CANLF]                                              | 1,19  | 1 | 1 | 1 | 1 |
| Q8SP55     | Periplakin (Fragment) OS=Canis lupus familiaris PE=2 SV=1 - [Q8SP55_CANLF]                                                     | 1,17  | 1 | 0 | 1 | 1 |
| E2RJC1     | POZ/BTB and AT hook containing zinc finger 1 OS=Canis lupus familiaris GN=PATZ1 PE=4 SV=1 - [E2RJC1_CANLF]                     | 1,16  | 1 | 0 | 1 | 1 |
| F1P855     | Retrotransposon Gag like 1 OS=Canis lupus familiaris GN=RTL1 PE=4 SV=2 - [F1P855_CANLF]                                        | 1,04  | 1 | 1 | 1 | 1 |
| F1PXQ7     | SLX4 structure-specific endonuclease subunit OS=Canis lupus familiaris GN=SLX4 PE=4 SV=2 - [F1PXQ7_CANLF]                      | 1,04  | 1 | 1 | 1 | 1 |
| F1PHA4     | Senataxin OS=Canis lupus familiaris GN=SETX PE=4 SV=2 - [F1PHA4_CANLF]                                                         | 0,99  | 1 | 1 | 1 | 1 |
| E2RMG8     | MIS18 binding protein 1 OS=Canis lupus familiaris GN=MIS18BP1 PE=4 SV=2 - [E2RMG8_CANLF]                                       | 0,97  | 1 | 0 | 1 | 1 |
| J9NTS4     | MIS18 binding protein 1 OS=Canis lupus familiaris GN=MIS18BP1 PE=4 SV=1 - [J9NTS4_CANLF]                                       | 0,96  | 1 | 0 | 1 | 1 |
| E2R9M1     | Minichromosome maintenance 8 homologous recombination repair factor OS=Canis lupus familiaris GN=MCM8                          | 0,96  | 1 | 1 | 1 | 1 |
| E2RMJ1     | MIS18 binding protein 1 OS=Canis lupus familiaris GN=MIS18BP1 PE=4 SV=2 - [E2RMJ1_CANLF]                                       | 0,95  | 1 | 0 | 1 | 1 |
| J9P8L3     | Uncharacterized protein OS=Canis lupus familiaris GN=LOC489591 PE=4 SV=1 - [J9P8L3_CANLF]                                      | 0,94  | 1 | 0 | 1 | 1 |
| F6UW10     | Ribosomal protein S6 kinase OS=Canis lupus familiaris GN=RP56KA2 PE=3 SV=1 - [F6UW10_CANLF]                                    | 0,93  | 1 | 1 | 1 | 1 |
| J9NTS7     | Uncharacterized protein OS=Canis lupus familiaris GN=LOC489591 PE=4 SV=1 - [J9NTS7_CANLF]                                      | 0,9   | 1 | 0 | 1 | 1 |
| J9NW55     | Uncharacterized protein OS=Canis lupus familiaris GN=LOC489591 PE=4 SV=1 - [J9NW55_CANLF]                                      | 0,89  | 1 | 0 | 1 | 1 |
| E2R4W7     | Uncharacterized protein OS=Canis lupus familiaris GN=LOC489591 PE=4 SV=2 - [E2R4W7_CANLF]                                      | 0,87  | 1 | 1 | 1 | 1 |
| F6XKL7     | HECT, UBA and WWE domain containing 1, E3 ubiquitin protein ligase OS=Canis lupus familiaris GN=HUWE1 PE                       | 0,59  | 1 | 0 | 1 | 1 |
| F6XM35     | HECT, UBA and WWE domain containing 1, E3 ubiquitin protein ligase OS=Canis lupus familiaris GN=HUWE1 PE                       | 0,59  | 1 | 0 | 1 | 1 |
| F1P7Q1     | Ral GTPase activating protein catalytic alpha subunit 2 OS=Canis lupus familiaris GN=RALGAP2 PE=4 SV=2 - [F1P7Q1_CANLF]        | 0,48  | 1 | 1 | 1 | 1 |
| F1Q1I3     | Periplakin OS=Canis lupus familiaris GN=PPL PE=4 SV=2 - [F1Q1I3_CANLF]                                                         | 0,46  | 1 | 0 | 1 | 1 |
| J9NU37     | Periplakin OS=Canis lupus familiaris GN=PPL PE=4 SV=1 - [J9NU37_CANLF]                                                         | 0,46  | 1 | 0 | 1 | 1 |
| F1Q3V9     | Spectrin repeat containing nuclear envelope protein 2 OS=Canis lupus familiaris GN=SYNE2 PE=4 SV=2 - [F1Q3V9_CANLF]            | 0,1   | 1 | 1 | 1 | 1 |
| F1Q1B9     | Zinc finger MYND-type containing 19 OS=Canis lupus familiaris GN=ZMYND19 PE=4 SV=1 - [F1Q1B9_CANLF]                            | 13,78 | 1 | 1 | 1 | 1 |
| A0A0E3V3A1 | Uncharacterized protein OS=Pasteurella multocida subsp. multocida OH4807 GN=I926_00545 PE=4 SV=1 - [A0A0E3V3A1_CANLF]          | 11,11 | 1 | 1 | 1 | 1 |
| E0W6Z3     | Insulin-like growth factor 2 splice variant 1 OS=Canis lupus familiaris PE=2 SV=1 - [E0W6Z3_CANLF]                             | 8,79  | 1 | 0 | 1 | 1 |
| A0A0E3ZS86 | Uncharacterized protein OS=Pasteurella multocida subsp. multocida OH4807 GN=I926_08120 PE=3 SV=1 - [A0A0E3ZS86_CANLF]          | 8,7   | 1 | 1 | 1 | 1 |
| E0W6Z5     | Insulin-like growth factor 2 splice variant 2 OS=Canis lupus familiaris PE=2 SV=1 - [E0W6Z5_CANLF]                             | 8,65  | 1 | 0 | 1 | 1 |
| J9NYS6     | Insulin like growth factor 2 OS=Canis lupus familiaris GN=IGF2 PE=3 SV=1 - [J9NYS6_CANLF]                                      | 8,56  | 1 | 0 | 1 | 1 |
| F6X9Z7     | Centrin 3 OS=Canis lupus familiaris GN=CETN3 PE=4 SV=1 - [F6X9Z7_CANLF]                                                        | 8,44  | 1 | 1 | 1 | 1 |
| F1PBX5     | Insulin like growth factor 2 OS=Canis lupus familiaris GN=IGF2 PE=3 SV=2 - [F1PBX5_CANLF]                                      | 8,25  | 1 | 0 | 1 | 1 |
| A0A0E3ZQ53 | Uncharacterized protein OS=Pasteurella multocida subsp. multocida OH4807 GN=I926_06790 PE=3 SV=1 - [A0A0E3ZQ53_CANLF]          | 6,63  | 1 | 1 | 1 | 1 |
| F1PP91     | DnaJ heat shock protein family (Hsp40) member A4 OS=Canis lupus familiaris GN=DNAJA4 PE=3 SV=1 - [F1PP91_CANLF]                | 6,27  | 1 | 1 | 1 | 1 |
| J9P961     | Insulin like growth factor 2 OS=Canis lupus familiaris GN=IGF2 PE=3 SV=1 - [J9P961_CANLF]                                      | 6,18  | 1 | 0 | 1 | 1 |
| E2RNF9     | Methyltransferase like 27 OS=Canis lupus familiaris GN=METTL27 PE=4 SV=2 - [E2RNF9_CANLF]                                      | 5,84  | 1 | 1 | 1 | 1 |
| J9NRF8     | ATP synthase subunit d, mitochondrial OS=Canis lupus familiaris PE=3 SV=1 - [J9NRF8_CANLF]                                     | 5,63  | 1 | 1 | 1 | 1 |
| F1PPR0     | Eukaryotic translation initiation factor 3 subunit I OS=Canis lupus familiaris GN=EIF3I PE=3 SV=1 - [F1PPR0_CANLF]             | 5,54  | 1 | 1 | 1 | 1 |
| Q2VD95     | Carbohydrate sulfotransferase (Fragment) OS=Canis lupus GN=CHST12 PE=3 SV=1 - [Q2VD95_CANLF]                                   | 5,53  | 1 | 0 | 1 | 1 |
| F1PCA4     | Chromodomain Y like 2 OS=Canis lupus familiaris GN=CDYL2 PE=4 SV=2 - [F1PCA4_CANLF]                                            | 5,44  | 1 | 1 | 1 | 1 |
| F1PEB7     | Carbohydrate sulfotransferase OS=Canis lupus familiaris GN=CHST9 PE=3 SV=2 - [F1PEB7_CANLF]                                    | 5,23  | 1 | 1 | 1 | 1 |
| E2RPE5     | Ribosomal protein L35 OS=Canis lupus familiaris GN=RPL35 PE=3 SV=2 - [E2RPE5_CANLF]                                            | 4,88  | 1 | 0 | 1 | 3 |
| A0A0E3ZQL3 | Membrane-bound metalloproteinase OS=Pasteurella multocida subsp. multocida OH4807 GN=I926_08805 PE=4 SV=1 - [A0A0E3ZQL3_CANLF] | 4,4   | 1 | 1 | 1 | 2 |
| J9NXP7     | KAT8 regulator NSL complex subunit 2 OS=Canis lupus familiaris GN=KANSL2 PE=4 SV=1 - [J9NXP7_CANLF]                            | 4,27  | 1 | 1 | 1 | 1 |
| F1Q1C5     | Staufen double-stranded RNA binding protein 1 OS=Canis lupus familiaris GN=STAU1 PE=4 SV=2 - [F1Q1C5_CANLF]                    | 4,23  | 1 | 0 | 1 | 1 |
| F1PAM9     | Epidermal growth factor receptor substrate 15 OS=Canis lupus familiaris GN=EPS15 PE=4 SV=2 - [F1PAM9_CANLF]                    | 3,87  | 1 | 1 | 1 | 1 |
| J9PA02     | Uncharacterized protein OS=Canis lupus familiaris PE=4 SV=1 - [J9PA02_CANLF]                                                   | 3,76  | 1 | 1 | 1 | 1 |
| J9JH56     | Uncharacterized protein OS=Canis lupus familiaris PE=4 SV=1 - [J9JH56_CANLF]                                                   | 3,72  | 1 | 1 | 1 | 1 |
| J9NZL0     | Uncharacterized protein OS=Canis lupus familiaris PE=4 SV=1 - [J9NZL0_CANLF]                                                   | 3,7   | 1 | 0 | 1 | 2 |
| J9P393     | Staufen double-stranded RNA binding protein 1 OS=Canis lupus familiaris GN=STAU1 PE=4 SV=1 - [J9P393_CANLF]                    | 3,69  | 1 | 0 | 1 | 1 |
| E2R4V7     | Uncharacterized protein OS=Canis lupus familiaris PE=4 SV=2 - [E2R4V7_CANLF]                                                   | 3,53  | 1 | 0 | 1 | 2 |
| S4S268     | Glycoprotein OS=Mokola virus PE=4 SV=1 - [S4S268_MOKV]                                                                         | 3,26  | 1 | 0 | 1 | 1 |
| R9Q7B7     | Glycoprotein OS=Mokola virus PE=4 SV=1 - [R9Q7B7_MOKV]                                                                         | 3,26  | 1 | 0 | 1 | 1 |
| SSDTC1     | Glycoprotein OS=Mokola virus GN=G PE=4 SV=1 - [SSDTC1_MOKV]                                                                    | 3,26  | 1 | 0 | 1 | 1 |
| J9NUW3     | Uncharacterized protein OS=Canis lupus familiaris GN=GGTA1 PE=4 SV=1 - [J9NUW3_CANLF]                                          | 3,24  | 1 | 1 | 1 | 1 |
| A0A0E3V3Y2 | Ribosome-recycling factor OS=Pasteurella multocida subsp. multocida OH4807 GN=frr PE=3 SV=1 - [A0A0E3V3Y2_CANLF]               | 3,24  | 1 | 1 | 1 | 1 |
| F1PJI0     | Uncharacterized protein OS=Canis lupus familiaris PE=4 SV=2 - [F1PJI0_CANLF]                                                   | 3,17  | 1 | 1 | 1 | 1 |
| J9NS69     | Carbohydrate sulfotransferase OS=Canis lupus familiaris GN=CHST12 PE=3 SV=1 - [J9NS69_CANLF]                                   | 3,1   | 1 | 0 | 1 | 1 |
| F1PH10     | Protein disulfide isomerase like, testis expressed OS=Canis lupus familiaris GN=PDILT PE=4 SV=2 - [F1PH10_CANLF]               | 3,1   | 1 | 1 | 1 | 1 |
| A0A0A0MPD2 | Ribosomal protein L19 OS=Canis lupus familiaris GN=RPL19 PE=3 SV=1 - [A0A0A0MPD2_CANLF]                                        | 3,09  | 1 | 0 | 1 | 3 |
| E2REX9     | Uncharacterized protein OS=Canis lupus familiaris PE=4 SV=2 - [E2REX9_CANLF]                                                   | 3,09  | 1 | 0 | 1 | 2 |
| D0VWQ5     | 60S ribosomal protein L19 OS=Canis lupus familiaris GN=RPL19 PE=1 SV=1 - [R1L19_CANLF]                                         | 3,06  | 1 | 0 | 1 | 3 |
| E2RTB1     | Uncharacterized protein OS=Canis lupus familiaris GN=NPM1 PE=4 SV=2 - [E2RTB1_CANLF]                                           | 3,06  | 1 | 0 | 1 | 2 |
| J9P3P1     | Arginase OS=Canis lupus familiaris GN=ARG2 PE=3 SV=1 - [J9P3P1_CANLF]                                                          | 2,96  | 1 | 0 | 1 | 1 |
| J9P062     | Nuclear receptor subfamily 1 group I member 2 OS=Canis lupus familiaris GN=NR1I2 PE=3 SV=1 - [J9P062_CANLF]                    | 2,74  | 1 | 0 | 1 | 1 |
| Q8SQ02     | Pregnane X receptor (Fragment) OS=Canis lupus familiaris GN=PXRE PE=2 SV=1 - [Q8SQ02_CANLF]                                    | 2,74  | 1 | 0 | 1 | 1 |
| E2R8N6     | Arginase OS=Canis lupus familiaris GN=ARG2 PE=3 SV=2 - [E2R8N6_CANLF]                                                          | 2,67  | 1 | 0 | 1 | 1 |
| F6V8I0     | Uncharacterized protein OS=Canis lupus familiaris GN=MLPH PE=4 SV=1 - [F6V8I0_CANLF]                                           | 2,58  | 1 | 1 | 1 | 1 |
| Q4KKT7     | Melanophilin OS=Canis lupus familiaris GN=mlph PE=4 SV=2 - [Q4KKT7_CANLF]                                                      | 2,58  | 1 | 0 | 1 | 1 |
| Q4QZB9     | Melanophilin OS=Canis lupus familiaris GN=mlph PE=2 SV=1 - [Q4QZB9_CANLF]                                                      | 2,58  | 1 | 0 | 1 | 1 |
| F6XG74     | IQ motif and ubiquitin domain containing OS=Canis lupus familiaris GN=IQUB PE=4 SV=1 - [F6XG74_CANLF]                          | 2,52  | 1 | 1 | 1 | 1 |
| F6V2B9     | G protein signaling modulator 2 OS=Canis lupus familiaris GN=GPSM2 PE=4 SV=1 - [F6V2B9_CANLF]                                  | 2,5   | 1 | 0 | 1 | 1 |

|            |                                                                                                                 |       |   |   |   |   |
|------------|-----------------------------------------------------------------------------------------------------------------|-------|---|---|---|---|
| E2R6C5     | IQ motif and ubiquitin domain containing OS=Canis lupus familiaris GN=IQUB PE=4 SV=1 - [E2R6C5_CANLF]           | 2,48  | 1 | 0 | 1 | 1 |
| J9NV47     | Hyaluronan binding protein 2 OS=Canis lupus familiaris GN=HABP2 PE=3 SV=1 - [J9NV47_CANLF]                      | 2,42  | 1 | 0 | 1 | 1 |
| E2R151     | Anoctamin OS=Canis lupus familiaris GN=ANO4 PE=3 SV=1 - [E2R151_CANLF]                                          | 2,41  | 1 | 1 | 1 | 1 |
| F6Y4R5     | Patatin like phospholipase domain containing 8 OS=Canis lupus familiaris GN=PNPLA8 PE=4 SV=1 - [F6Y4R5_CA       | 2,38  | 1 | 1 | 1 | 1 |
| F1Q1K9     | Hyaluronan binding protein 2 OS=Canis lupus familiaris GN=HABP2 PE=3 SV=2 - [F1Q1K9_CANLF]                      | 2,15  | 1 | 0 | 1 | 1 |
| F1Q075     | Nuclear receptor subfamily 1 group 1 member 2 OS=Canis lupus familiaris GN=NR112 PE=3 SV=2 - [F1Q075_CAN        | 2,05  | 1 | 0 | 1 | 1 |
| F1PH18     | Transmembrane channel-like protein OS=Canis lupus familiaris GN=TMC1 PE=3 SV=2 - [F1PH18_CANLF]                 | 1,98  | 1 | 1 | 1 | 1 |
| F1PC09     | RAB GTPase activating protein 1 OS=Canis lupus familiaris GN=RABGAP1 PE=4 SV=2 - [F1PC09_CANLF]                 | 1,78  | 1 | 1 | 1 | 1 |
| J9NYA9     | Short chain dehydrogenase/reductase family 42E, member 1 OS=Canis lupus familiaris GN=SDR42E1 PE=3 SV=1         | 1,78  | 1 | 1 | 1 | 1 |
| E2RQD5     | Leucine rich repeat containing 8 family member A OS=Canis lupus familiaris GN=LRR8A PE=4 SV=1 - [E2RQD5_        | 1,73  | 1 | 1 | 1 | 1 |
| D6C6L9     | Matrix extracellular phosphoglycoprotein OS=Canis lupus familiaris GN=MEPE PE=4 SV=1 - [D6C6L9_CANLF]           | 1,62  | 1 | 1 | 1 | 3 |
| J9NU33     | Uncharacterized protein OS=Canis lupus familiaris GN=LOC100684878 PE=3 SV=1 - [J9NU33_CANLF]                    | 1,62  | 1 | 1 | 1 | 1 |
| F1PHV9     | Tetrapeptide repeat domain 28 OS=Canis lupus familiaris GN=TTC28 PE=4 SV=2 - [F1PHV9_CANLF]                     | 1,38  | 1 | 1 | 1 | 1 |
| F5C3N2     | Nephrilysin-749 OS=Canis lupus familiaris GN=MME PE=2 SV=1 - [F5C3N2_CANLF]                                     | 1,34  | 1 | 0 | 1 | 2 |
| E2RQ25     | Uncharacterized protein OS=Canis lupus familiaris GN=MME PE=4 SV=1 - [E2RQ25_CANLF]                             | 1,33  | 1 | 0 | 1 | 2 |
| E2RP26     | Filamin C OS=Canis lupus familiaris GN=FLNC PE=4 SV=1 - [E2RP26_CANLF]                                          | 1,32  | 1 | 1 | 1 | 1 |
| F1PG19     | Tetrapeptide repeat domain 21A OS=Canis lupus familiaris GN=TTC21A PE=4 SV=2 - [F1PG19_CANLF]                   | 1,3   | 1 | 1 | 1 | 1 |
| J9POS8     | Sortilin related VPS10 domain containing receptor 3 OS=Canis lupus familiaris GN=SORCS3 PE=4 SV=1 - [J9POS8     | 1,24  | 1 | 0 | 1 | 1 |
| F1PS95     | Sortilin related VPS10 domain containing receptor 3 OS=Canis lupus familiaris GN=SORCS3 PE=4 SV=2 - [F1PS95     | 1,23  | 1 | 0 | 1 | 1 |
| F1PVV7     | Myosin heavy chain 10 OS=Canis lupus familiaris GN=MYH10 PE=3 SV=2 - [F1PVV7_CANLF]                             | 1,22  | 1 | 1 | 1 | 2 |
| J9P016     | PR/SET domain 16 OS=Canis lupus familiaris GN=PRDM16 PE=4 SV=1 - [J9P016_CANLF]                                 | 1,21  | 1 | 0 | 1 | 1 |
| F1P8R4     | TBC1 domain family member 8B OS=Canis lupus familiaris GN=TBC1D8B PE=4 SV=2 - [F1P8R4_CANLF]                    | 1,16  | 1 | 0 | 1 | 1 |
| J9P659     | TBC1 domain family member 8B OS=Canis lupus familiaris GN=TBC1D8B PE=4 SV=1 - [J9P659_CANLF]                    | 1,16  | 1 | 0 | 1 | 1 |
| J9P856     | TBC1 domain family member 8B OS=Canis lupus familiaris GN=TBC1D8B PE=4 SV=1 - [J9P856_CANLF]                    | 1,16  | 1 | 0 | 1 | 1 |
| E2RP22     | Eukaryotic translation initiation factor 4E nuclear import factor 1 OS=Canis lupus familiaris GN=EIF4ENIF1 PE=4 | 1,12  | 1 | 1 | 1 | 2 |
| F1Q029     | PR/SET domain 16 OS=Canis lupus familiaris GN=PRDM16 PE=4 SV=2 - [F1Q029_CANLF]                                 | 1,11  | 1 | 0 | 1 | 1 |
| J9P9J1     | CWC22 spliceosome associated protein homolog OS=Canis lupus familiaris GN=CWC22 PE=4 SV=1 - [J9P9J1_CA          | 1,1   | 1 | 0 | 1 | 4 |
| E2RIF6     | CWC22 spliceosome associated protein homolog OS=Canis lupus familiaris GN=CWC22 PE=4 SV=2 - [E2RIF6_CA          | 1,09  | 1 | 0 | 1 | 4 |
| J9P725     | Uncharacterized protein OS=Canis lupus familiaris GN=CCDC141 PE=4 SV=1 - [J9P725_CANLF]                         | 1,08  | 1 | 0 | 1 | 1 |
| E2RMR3     | Heterogeneous nuclear ribonucleoprotein M OS=Canis lupus familiaris GN=HNRNPM PE=4 SV=2 - [E2RMR3_CA            | 1,08  | 1 | 1 | 1 | 3 |
| E2RDM3     | Uncharacterized protein OS=Canis lupus familiaris GN=LOC479816 PE=4 SV=2 - [E2RDM3_CANLF]                       | 1,01  | 1 | 0 | 1 | 1 |
| J9P0N5     | Uncharacterized protein OS=Canis lupus familiaris GN=LOC479816 PE=4 SV=1 - [J9P0N5_CANLF]                       | 1,01  | 1 | 0 | 1 | 1 |
| F1PRX7     | EPH receptor A6 OS=Canis lupus familiaris GN=EPHA6 PE=3 SV=2 - [F1PRX7_CANLF]                                   | 0,99  | 1 | 0 | 1 | 1 |
| F1PRX3     | EPH receptor A6 OS=Canis lupus familiaris GN=EPHA6 PE=3 SV=2 - [F1PRX3_CANLF]                                   | 0,92  | 1 | 0 | 1 | 1 |
| E2R586     | G protein-coupled receptor 158 OS=Canis lupus familiaris GN=GPR158 PE=4 SV=2 - [E2R586_CANLF]                   | 0,92  | 1 | 1 | 1 | 1 |
| E2R1O2     | Microtubule associated protein 6 OS=Canis lupus familiaris GN=MAP6 PE=4 SV=2 - [E2R1O2_CANLF]                   | 0,9   | 1 | 0 | 1 | 1 |
| F1PUC2     | Uncharacterized protein OS=Canis lupus familiaris GN=CCDC141 PE=4 SV=2 - [F1PUC2_CANLF]                         | 0,89  | 1 | 0 | 1 | 1 |
| F6XIY7     | Uncharacterized protein OS=Canis lupus familiaris PE=4 SV=1 - [F6XIY7_CANLF]                                    | 0,82  | 1 | 1 | 1 | 1 |
| E2QU15     | Chromodomain helicase DNA binding protein 1 OS=Canis lupus familiaris GN=CHD1 PE=4 SV=1 - [E2QU15_CANI          | 0,82  | 1 | 0 | 1 | 1 |
| F1PYH1     | Reelin OS=Canis lupus familiaris GN=RELN PE=4 SV=2 - [F1PYH1_CANLF]                                             | 0,81  | 1 | 0 | 1 | 1 |
| J9NZL6     | Reelin OS=Canis lupus familiaris GN=RELN PE=4 SV=1 - [J9NZL6_CANLF]                                             | 0,81  | 1 | 0 | 1 | 1 |
| J9P6Y8     | Chromodomain helicase DNA binding protein 1 OS=Canis lupus familiaris GN=CHD1 PE=4 SV=1 - [J9P6Y8_CANL          | 0,79  | 1 | 0 | 1 | 1 |
| F1P7H1     | Megakaryoblastic leukemia (translocation) 1 OS=Canis lupus familiaris GN=MKL1 PE=4 SV=2 - [F1P7H1_CANLF]        | 0,75  | 1 | 0 | 1 | 1 |
| J9P8E5     | Microtubule associated protein 6 OS=Canis lupus familiaris GN=MAP6 PE=4 SV=1 - [J9P8E5_CANLF]                   | 0,74  | 1 | 0 | 1 | 1 |
| E2RDZ9     | Kinesin-like protein OS=Canis lupus familiaris GN=KIF5C PE=3 SV=2 - [E2RDZ9_CANLF]                              | 0,73  | 1 | 0 | 1 | 1 |
| E2R4M6     | Caspase 8 associated protein 2 OS=Canis lupus familiaris GN=CASP8AP2 PE=4 SV=2 - [E2R4M6_CANLF]                 | 0,71  | 1 | 1 | 1 | 1 |
| E2QY15     | Unc-13 homolog C OS=Canis lupus familiaris GN=UNC13C PE=4 SV=2 - [E2QY15_CANLF]                                 | 0,63  | 1 | 0 | 1 | 1 |
| E2QUU0     | Thyroid hormone receptor interactor 11 OS=Canis lupus familiaris GN=TRIP11 PE=4 SV=2 - [E2QUU0_CANLF]           | 0,61  | 1 | 1 | 1 | 1 |
| A0A0E3ZQ4  | DNA-directed RNA polymerase subunit beta OS=Pasteurella multocida subsp. multocida OH4807 GN=rpoB PE=           | 0,6   | 1 | 1 | 1 | 1 |
| F1P872     | ATP binding cassette subfamily A member 12 OS=Canis lupus familiaris GN=ABCA12 PE=4 SV=2 - [F1P872_CANL         | 0,35  | 1 | 1 | 1 | 1 |
| E2RMC0     | Inositol 1,4,5-trisphosphate receptor type 3 OS=Canis lupus familiaris GN=ITPR3 PE=4 SV=2 - [E2RMC0_CANLF]      | 0,22  | 1 | 0 | 1 | 3 |
| F1Q0H6     | Inositol 1,4,5-trisphosphate receptor type 2 OS=Canis lupus familiaris GN=ITPR2 PE=4 SV=2 - [F1Q0H6_CANLF]      | 0,22  | 1 | 0 | 1 | 3 |
| F1Q1P4     | Microtubule-actin crosslinking factor 1 OS=Canis lupus familiaris GN=MACF1 PE=4 SV=2 - [F1Q1P4_CANLF]           | 0,14  | 1 | 0 | 1 | 1 |
| 10BWQ3     | Potassium voltage-gated channel subfamily KQT member 2 (Fragment) OS=Canis lupus familiaris GN=KCNQ2 P          | 94,12 | 1 | 1 | 1 | 1 |
| Q6PX08     | Ceruloplasmin (Fragment) OS=Canis lupus familiaris PE=2 SV=1 - [Q6PX08_CANLF]                                   | 19,18 | 1 | 0 | 1 | 1 |
| J9P260     | CDG5H iron sulfur domain 3 OS=Canis lupus familiaris GN=CSD3 PE=4 SV=1 - [J9P260_CANLF]                         | 16,8  | 1 | 1 | 1 | 2 |
| L7N0G6     | Uncharacterized protein OS=Canis lupus familiaris PE=4 SV=1 - [L7N0G6_CANLF]                                    | 16,18 | 1 | 1 | 1 | 2 |
| A0A0E3V563 | Uncharacterized protein OS=Pasteurella multocida subsp. multocida OH4807 GN=I926_09195 PE=4 SV=1 - [A0/         | 14,09 | 1 | 1 | 1 | 1 |
| A0A0E3V475 | Uncharacterized protein OS=Pasteurella multocida subsp. multocida OH4807 GN=I926_07595 PE=4 SV=1 - [A0/         | 11,49 | 1 | 1 | 1 | 1 |
| F1PGD3     | Kelch domain containing 10 OS=Canis lupus familiaris GN=KLHDC10 PE=4 SV=2 - [F1PGD3_CANLF]                      | 9,51  | 1 | 1 | 1 | 1 |
| E2R1B0     | Uncharacterized protein OS=Canis lupus familiaris GN=LOC612524 PE=4 SV=2 - [E2R1B0_CANLF]                       | 9,04  | 1 | 1 | 1 | 1 |
| J9P1P3     | Zinc finger protein 322 OS=Canis lupus familiaris GN=ZNF322 PE=4 SV=1 - [J9P1P3_CANLF]                          | 6,97  | 1 | 1 | 1 | 1 |
| J9NSD1     | Uncharacterized protein OS=Canis lupus familiaris PE=4 SV=1 - [J9NSD1_CANLF]                                    | 6,46  | 1 | 0 | 1 | 1 |
| J9P9V6     | Uncharacterized protein OS=Canis lupus familiaris PE=4 SV=1 - [J9P9V6_CANLF]                                    | 6,19  | 1 | 0 | 1 | 1 |
| E2R3C5     | DFNA5, deafness associated tumor suppressor OS=Canis lupus familiaris GN=DFNA5 PE=4 SV=1 - [E2R3C5_CAN          | 5,86  | 1 | 1 | 1 | 1 |
| E2QW61     | Uncharacterized protein OS=Canis lupus familiaris PE=4 SV=2 - [E2QW61_CANLF]                                    | 5,67  | 1 | 1 | 1 | 7 |
| A0A0E3ZQR5 | TnaB OS=Pasteurella multocida subsp. multocida OH4807 GN=I926_08420 PE=4 SV=1 - [A0A0E3ZQR5_PASMD]              | 4,95  | 1 | 1 | 1 | 1 |
| J9NY89     | Sulfurtransferase OS=Canis lupus familiaris GN=TSTD3 PE=4 SV=1 - [J9NY89_CANLF]                                 | 4,4   | 1 | 0 | 1 | 1 |
| E2R0K1     | SRY-box 8 OS=Canis lupus familiaris GN=SOX8 PE=4 SV=1 - [E2R0K1_CANLF]                                          | 4,33  | 1 | 0 | 1 | 1 |
| J9NRL8     | SRY-box 8 OS=Canis lupus familiaris GN=SOX8 PE=4 SV=1 - [J9NRL8_CANLF]                                          | 4,33  | 1 | 0 | 1 | 1 |
| J9NTC6     | Uncharacterized protein OS=Canis lupus familiaris GN=ZNF41 PE=3 SV=1 - [J9NTC6_CANLF]                           | 4,26  | 1 | 1 | 1 | 1 |
| F6X9Q8     | DDB1 and CUL4 associated factor 15 OS=Canis lupus familiaris GN=DCAF15 PE=4 SV=1 - [F6X9Q8_CANLF]               | 3,71  | 1 | 1 | 1 | 1 |
| E2RJ29     | Developmentally regulated GTP binding protein 2 OS=Canis lupus familiaris GN=DRG2 PE=4 SV=1 - [E2RJ29_CA        | 3,57  | 1 | 1 | 1 | 1 |
| J9P576     | Uncharacterized protein OS=Canis lupus familiaris PE=4 SV=1 - [J9P576_CANLF]                                    | 3,53  | 1 | 0 | 1 | 1 |
| F1P6X2     | MutS homolog 4 OS=Canis lupus familiaris GN=MSH4 PE=4 SV=2 - [F1P6X2_CANLF]                                     | 3,51  | 1 | 0 | 1 | 1 |
| E2RTJ9     | Pyridine nucleotide-disulphide oxidoreductase domain 1 OS=Canis lupus familiaris GN=PYROXD1 PE=4 SV=2 - [E      | 3,47  | 1 | 1 | 1 | 2 |
| E2RJA9     | MutS homolog 4 OS=Canis lupus familiaris GN=MSH4 PE=4 SV=2 - [E2RJA9_CANLF]                                     | 3,01  | 1 | 0 | 1 | 1 |
| J9P118     | XK-related protein OS=Canis lupus familiaris GN=XK PE=3 SV=1 - [J9P118_CANLF]                                   | 2,93  | 1 | 1 | 1 | 1 |
| E2RJ15     | MFNG O-fucosyltransferase 3-beta-N-acetylglucosaminyltransferase OS=Canis lupus familiaris GN=MFNG PE=4 SV=     | 2,86  | 1 | 1 | 1 | 1 |
| F1PZ34     | Epidermal growth factor receptor pathway substrate 15 like 1 OS=Canis lupus familiaris GN=EPS15L1 PE=4 SV=      | 2,53  | 1 | 0 | 1 | 1 |
| J9P7A9     | Epidermal growth factor receptor pathway substrate 15 like 1 OS=Canis lupus familiaris GN=EPS15L1 PE=4 SV=      | 2,48  | 1 | 0 | 1 | 1 |
| F1PK60     | Transglutaminase 3 OS=Canis lupus familiaris GN=TGM3 PE=4 SV=1 - [F1PK60_CANLF]                                 | 2,45  | 1 | 1 | 1 | 1 |
| F1PSJ2     | CD84 molecule OS=Canis lupus familiaris GN=CD84 PE=4 SV=2 - [F1PSJ2_CANLF]                                      | 2,35  | 1 | 1 | 1 | 1 |
| E2QU17     | EPS8 like 1 OS=Canis lupus familiaris GN=EPS8L1 PE=4 SV=2 - [E2QU17_CANLF]                                      | 2,25  | 1 | 1 | 1 | 1 |
| F1PGL0     | ADAM metalloproteinase with thrombospondin type 1 motif 1 OS=Canis lupus familiaris GN=ADAMTS1 PE=4 SV          | 2,21  | 1 | 1 | 1 | 1 |
| J9P6J2     | Armadillo repeat containing 9 OS=Canis lupus familiaris GN=ARMC9 PE=4 SV=1 - [J9P6J2_CANLF]                     | 1,85  | 1 | 0 | 1 | 1 |
| E2RHR9     | Neuroepithelial cell transforming 1 OS=Canis lupus familiaris GN=NET1 PE=4 SV=1 - [E2RHR9_CANLF]                | 1,85  | 1 | 1 | 1 | 1 |
| F1PCZ0     | Septin 5 OS=Canis lupus familiaris GN=SEPT5 PE=3 SV=2 - [F1PCZ0_CANLF]                                          | 1,85  | 1 | 1 | 1 | 1 |
| J9P5E1     | TAR (HIV-1) RNA binding protein 1 OS=Canis lupus familiaris GN=TARBP1 PE=4 SV=1 - [J9P5E1_CANLF]                | 1,84  | 1 | 0 | 1 | 1 |
| E2QYA7     | Armadillo repeat containing 9 OS=Canis lupus familiaris GN=ARMC9 PE=4 SV=2 - [E2QYA7_CANLF]                     | 1,84  | 1 | 0 | 1 | 1 |
| F1PWU0     | TAR (HIV-1) RNA binding protein 1 OS=Canis lupus familiaris GN=TARBP1 PE=4 SV=2 - [F1PWU0_CANLF]                | 1,81  | 1 | 0 | 1 | 1 |
| E2RDS2     | Zinc finger protein 282 OS=Canis lupus familiaris GN=ZNF282 PE=4 SV=2 - [E2RDS2_CANLF]                          | 1,7   | 1 | 1 | 1 | 1 |
| F1PZ23     | Tyrosine-protein phosphatase OS=Canis lupus familiaris GN=PTPN12 PE=4 SV=2 - [F1PZ23_CANLF]                     | 1,6   | 1 | 1 | 1 | 1 |

|            |                                                                                                                               |      |   |   |   |   |
|------------|-------------------------------------------------------------------------------------------------------------------------------|------|---|---|---|---|
| J9P7H5     | Catenin delta 1 OS=Canis lupus familiaris GN=CTNND1 PE=4 SV=1 - [J9P7H5_CANLF]                                                | 1,5  | 1 | 1 | 1 | 1 |
| E2RJF8     | Kinesin family member 15 OS=Canis lupus familiaris GN=KIF15 PE=3 SV=2 - [E2RJF8_CANLF]                                        | 1,44 | 1 | 0 | 1 | 1 |
| F1PSL9     | Kinesin family member 15 OS=Canis lupus familiaris GN=KIF15 PE=3 SV=2 - [F1PSL9_CANLF]                                        | 1,37 | 1 | 0 | 1 | 1 |
| E2QSF3     | Spermatogenesis associated serine rich 2 OS=Canis lupus familiaris GN=SPATS2 PE=4 SV=1 - [E2QSF3_CANLF]                       | 1,28 | 1 | 0 | 1 | 1 |
| F6UV93     | Spermatogenesis associated serine rich 2 OS=Canis lupus familiaris GN=SPATS2 PE=4 SV=1 - [F6UV93_CANLF]                       | 1,28 | 1 | 0 | 1 | 1 |
| J9P5V6     | Talin 1 OS=Canis lupus familiaris GN=TLN1 PE=4 SV=1 - [J9P5V6_CANLF]                                                          | 1,28 | 1 | 0 | 1 | 1 |
| F1PSC2     | Talin 1 OS=Canis lupus familiaris GN=TLN1 PE=4 SV=2 - [F1PSC2_CANLF]                                                          | 1,22 | 1 | 0 | 1 | 1 |
| J9PJ32     | Bromodomain adjacent to zinc finger domain 1B OS=Canis lupus familiaris GN=BAZ1B PE=4 SV=1 - [J9PJ32_CANLF]                   | 1,08 | 1 | 0 | 1 | 2 |
| E2RED7     | Bromodomain adjacent to zinc finger domain 1B OS=Canis lupus familiaris GN=BAZ1B PE=4 SV=2 - [E2RED7_CANLF]                   | 1,01 | 1 | 0 | 1 | 2 |
| J9PAU7     | Bromodomain adjacent to zinc finger domain 1B OS=Canis lupus familiaris GN=BAZ1B PE=4 SV=1 - [J9PAU7_CANLF]                   | 1,01 | 1 | 0 | 1 | 2 |
| F1PKH7     | Cation channel sperm associated auxiliary subunit beta OS=Canis lupus familiaris GN=CATSPERB PE=4 SV=2 - [F1PKH7_CANLF]       | 0,99 | 1 | 1 | 1 | 1 |
| A8WA74     | L polyprotein OS=Bunyavirus snowshoe hare GN=L PE=4 SV=2 - [A8WA74_BUNSH]                                                     | 0,88 | 1 | 1 | 1 | 1 |
| F1PQM0     | BAH domain and coiled-coil containing 1 OS=Canis lupus familiaris GN=BAHCC1 PE=4 SV=2 - [F1PQM0_CANLF]                        | 0,63 | 1 | 1 | 1 | 1 |
| E2R117     | KIAA1109 OS=Canis lupus familiaris GN=KIAA1109 PE=4 SV=2 - [E2R117_CANLF]                                                     | 0,28 | 1 | 0 | 1 | 1 |
| F1PIE9     | KIAA1109 OS=Canis lupus familiaris GN=KIAA1109 PE=4 SV=2 - [F1PIE9_CANLF]                                                     | 0,28 | 1 | 0 | 1 | 1 |
| O97575     | Atrial myosin light chain homolog (Fragment) OS=Canis lupus familiaris PE=4 SV=1 - [O97575_CANLF]                             | 19,7 | 1 | 0 | 1 | 1 |
| Q9GKN4     | Mitotin (Fragment) OS=Canis lupus familiaris PE=4 SV=1 - [Q9GKN4_CANLF]                                                       | 8,95 | 1 | 0 | 1 | 1 |
| E2QYQ7     | SPC25, NDC80 kinetochore complex component OS=Canis lupus familiaris GN=SPC25 PE=4 SV=1 - [E2QYQ7_CANLF]                      | 8,85 | 1 | 1 | 1 | 1 |
| F1PS70     | Uncharacterized protein OS=Canis lupus familiaris GN=RFPL4A PE=4 SV=2 - [F1PS70_CANLF]                                        | 8,01 | 1 | 1 | 1 | 2 |
| F1Q3Z9     | Aspartate beta-hydroxylase domain containing 1 OS=Canis lupus familiaris GN=ASPHD1 PE=4 SV=2 - [F1Q3Z9_CANLF]                 | 7,63 | 1 | 1 | 1 | 1 |
| E2RJH5     | Heterogeneous nuclear ribonucleoprotein H2 OS=Canis lupus familiaris GN=HNRNPH2 PE=4 SV=2 - [E2RJH5_CANLF]                    | 7,35 | 1 | 0 | 1 | 1 |
| F1PA67     | SPT3 homolog, SAGA and STAGA complex component OS=Canis lupus familiaris GN=SUPT3H PE=4 SV=2 - [F1PA67_CANLF]                 | 6,41 | 1 | 1 | 1 | 1 |
| J9NZU9     | Uncharacterized protein OS=Canis lupus familiaris PE=4 SV=1 - [J9NZU9_CANLF]                                                  | 6,38 | 1 | 1 | 1 | 1 |
| E2R629     | Atypical chemokine receptor 1 (Duffy blood group) OS=Canis lupus familiaris GN=ACKR1 PE=4 SV=1 - [E2R629_CANLF]               | 6,04 | 1 | 1 | 1 | 1 |
| Q7YR87     | Amine oxidase [flavin-containing] B OS=Canis lupus familiaris GN=MAOB PE=2 SV=3 - [AOFB_CANLF]                                | 5,77 | 1 | 0 | 1 | 1 |
| F1PFF8     | Amine oxidase OS=Canis lupus familiaris GN=MAOB PE=3 SV=1 - [F1PFF8_CANLF]                                                    | 5,77 | 1 | 0 | 1 | 1 |
| E2RGR9     | Fumarate hydratase OS=Canis lupus familiaris GN=FH PE=3 SV=1 - [E2RGR9_CANLF]                                                 | 5,51 | 1 | 1 | 1 | 1 |
| E2R008     | Uncharacterized protein OS=Canis lupus familiaris PE=3 SV=2 - [E2R008_CANLF]                                                  | 5,14 | 1 | 0 | 1 | 1 |
| E2RRU2     | Sphingomyelin phosphodiesterase acid like 3A OS=Canis lupus familiaris GN=SMPDL3A PE=4 SV=2 - [E2RRU2_CANLF]                  | 4,87 | 1 | 0 | 1 | 2 |
| E2RCR9     | BTG anti-proliferation factor 4 OS=Canis lupus familiaris GN=BTG4 PE=4 SV=2 - [E2RCR9_CANLF]                                  | 4,84 | 1 | 1 | 1 | 1 |
| F1P840     | POU domain protein OS=Canis lupus familiaris GN=POU3F1 PE=3 SV=2 - [F1P840_CANLF]                                             | 4,39 | 1 | 1 | 1 | 2 |
| F1Q3E5     | Uncharacterized protein OS=Canis lupus familiaris PE=4 SV=2 - [F1Q3E5_CANLF]                                                  | 4,35 | 1 | 0 | 1 | 1 |
| E2QZG0     | Prolactin receptor OS=Canis lupus familiaris GN=PRLR PE=4 SV=1 - [E2QZG0_CANLF]                                               | 4    | 1 | 1 | 1 | 2 |
| E2RAS8     | Enolase 2 OS=Canis lupus familiaris GN=ENO2 PE=3 SV=2 - [E2RAS8_CANLF]                                                        | 3,81 | 1 | 0 | 1 | 1 |
| J9P7F2     | Ubiquitin conjugating enzyme E2 R2 OS=Canis lupus familiaris GN=UBE2R2 PE=3 SV=1 - [J9P7F2_CANLF]                             | 3,78 | 1 | 1 | 1 | 1 |
| E2R2H9     | FMR1 autosomal homolog 2 OS=Canis lupus familiaris GN=FXR2 PE=4 SV=1 - [E2R2H9_CANLF]                                         | 3,72 | 1 | 1 | 1 | 1 |
| J9NYQ3     | Sphingomyelin phosphodiesterase acid like 3A OS=Canis lupus familiaris GN=SMPDL3A PE=4 SV=1 - [J9NYQ3_CANLF]                  | 3,71 | 1 | 0 | 1 | 2 |
| J9NVMO     | L-lactate dehydrogenase OS=Canis lupus familiaris PE=3 SV=1 - [J9NVMO_CANLF]                                                  | 3,65 | 1 | 0 | 1 | 2 |
| J9NU05     | Uncharacterized protein OS=Canis lupus familiaris PE=3 SV=1 - [J9NU05_CANLF]                                                  | 3,63 | 1 | 0 | 1 | 2 |
| E2R761     | L-lactate dehydrogenase OS=Canis lupus familiaris GN=LDHB PE=3 SV=1 - [E2R761_CANLF]                                          | 3,59 | 1 | 0 | 1 | 2 |
| J9NT18     | L-lactate dehydrogenase OS=Canis lupus familiaris PE=3 SV=1 - [J9NT18_CANLF]                                                  | 3,59 | 1 | 0 | 1 | 2 |
| J9P3N9     | L-lactate dehydrogenase OS=Canis lupus familiaris PE=3 SV=1 - [J9P3N9_CANLF]                                                  | 3,59 | 1 | 0 | 1 | 2 |
| J9P290     | BTB domain containing 16 OS=Canis lupus familiaris GN=BTBD16 PE=4 SV=1 - [J9P290_CANLF]                                       | 3,59 | 1 | 0 | 1 | 1 |
| F1P746     | BTB domain containing 16 OS=Canis lupus familiaris GN=BTBD16 PE=4 SV=2 - [F1P746_CANLF]                                       | 3,56 | 1 | 0 | 1 | 1 |
| F1PUB4     | BTB domain containing 16 OS=Canis lupus familiaris GN=BTBD16 PE=4 SV=2 - [F1PUB4_CANLF]                                       | 3,56 | 1 | 0 | 1 | 1 |
| J9P386     | Uncharacterized protein OS=Canis lupus familiaris PE=4 SV=1 - [J9P386_CANLF]                                                  | 3,46 | 1 | 0 | 1 | 1 |
| J9P5H9     | Uncharacterized protein OS=Canis lupus familiaris GN=LOC102156555 PE=4 SV=1 - [J9P5H9_CANLF]                                  | 3,46 | 1 | 0 | 1 | 1 |
| F1PIB3     | L-lactate dehydrogenase OS=Canis lupus familiaris GN=LDHB PE=3 SV=2 - [F1PIB3_CANLF]                                          | 3,37 | 1 | 0 | 1 | 2 |
| E2R785     | Uncharacterized protein OS=Canis lupus familiaris GN=LOC608989 PE=4 SV=2 - [E2R785_CANLF]                                     | 3,33 | 1 | 1 | 1 | 1 |
| A0A0E3V567 | Deoxyguanosinetriphosphate triphosphohydrolase-like protein OS=Pasteurella multocida subsp. multocida OH                      | 3,33 | 1 | 1 | 1 | 2 |
| E2RLX8     | Transient receptor potential cation channel subfamily V member 2 OS=Canis lupus familiaris GN=TRPV2 PE=3 SV=1                 | 3,27 | 1 | 1 | 1 | 2 |
| F1PB47     | Chromosome 18 open reading frame 8 OS=Canis lupus familiaris GN=C18orf8 PE=4 SV=2 - [F1PB47_CANLF]                            | 3,17 | 1 | 1 | 1 | 1 |
| E2RAG5     | CWF19 like 2, cell cycle control (S. pombe) OS=Canis lupus familiaris GN=CWF19L2 PE=4 SV=2 - [E2RAG5_CANLF]                   | 2,92 | 1 | 1 | 1 | 2 |
| E2QX23     | Endonuclease III-like protein 1 OS=Canis lupus familiaris GN=NTHL1 PE=3 SV=2 - [E2QX23_CANLF]                                 | 2,88 | 1 | 1 | 1 | 1 |
| J9P6N1     | Phosphatidylinositol glycan anchor biosynthesis class K OS=Canis lupus familiaris GN=PIGK PE=4 SV=1 - [J9P6N1_CANLF]          | 2,78 | 1 | 1 | 1 | 1 |
| E2RD15     | Centrosomal protein 78 OS=Canis lupus familiaris GN=CEP78 PE=4 SV=2 - [E2RD15_CANLF]                                          | 2,64 | 1 | 1 | 1 | 1 |
| E2RPG3     | Adaptor related protein complex 1 gamma 1 subunit OS=Canis lupus familiaris GN=AP1G1 PE=4 SV=2 - [E2RPG3_CANLF]               | 2,55 | 1 | 1 | 1 | 1 |
| F1PN13     | Uncharacterized protein OS=Canis lupus familiaris PE=4 SV=2 - [F1PN13_CANLF]                                                  | 2,47 | 1 | 0 | 1 | 1 |
| A0A0E3V335 | Galactose/methyl galactoside import ATP-binding protein MglA OS=Pasteurella multocida subsp. multocida OH                     | 2,37 | 1 | 1 | 1 | 1 |
| F6V4A2     | Nuclear receptor subfamily 0 group B member 2 OS=Canis lupus familiaris GN=NROB2 PE=3 SV=1 - [F6V4A2_CANLF]                   | 2,15 | 1 | 1 | 1 | 1 |
| F1PX21     | Trafficking protein particle complex 11 OS=Canis lupus familiaris GN=TRAPPC11 PE=4 SV=2 - [F1PX21_CANLF]                      | 1,94 | 1 | 1 | 1 | 1 |
| A2VBC2     | Sialyltransferase 8 (Alpha 2,8-sialyltransferase) E (Fragment) OS=Canis lupus familiaris GN=SIAT8E PE=2 SV=1 - [A2VBC2_CANLF] | 1,93 | 1 | 0 | 1 | 1 |
| E2RDN7     | Phosphoserine/threonine kinase OS=Canis lupus familiaris GN=PSTK PE=4 SV=2 - [E2RDN7_CANLF]                                   | 1,93 | 1 | 1 | 1 | 1 |
| J9JHL8     | IKAROS family zinc finger 5 OS=Canis lupus familiaris GN=IKZF5 PE=4 SV=1 - [J9JHL8_CANLF]                                     | 1,91 | 1 | 1 | 1 | 1 |
| A0A0E3ZP25 | Glycerol-3-phosphate acyltransferase OS=Pasteurella multocida subsp. multocida OH4807 GN=plsB PE=3 SV=1                       | 1,85 | 1 | 1 | 1 | 1 |
| J9P1T8     | Dual specificity tyrosine phosphorylation regulated kinase 3 OS=Canis lupus familiaris GN=DYRK3 PE=4 SV=1 - [J9P1T8_CANLF]    | 1,81 | 1 | 0 | 1 | 1 |
| F1PSF2     | Uncharacterized protein OS=Canis lupus familiaris GN=ILRL2 PE=4 SV=1 - [F1PSF2_CANLF]                                         | 1,81 | 1 | 1 | 1 | 1 |
| F1PD83     | Forkhead box O3 OS=Canis lupus familiaris GN=FOXO3 PE=4 SV=2 - [F1PD83_CANLF]                                                 | 1,79 | 1 | 1 | 1 | 1 |
| F1PKV8     | ST8 alpha-N-acetylneuraminidase alpha-2,8-sialyltransferase 5 OS=Canis lupus familiaris GN=ST8SIA5 PE=3 SV=1                  | 1,7  | 1 | 0 | 1 | 1 |
| E2R8C3     | Dual specificity tyrosine phosphorylation regulated kinase 3 OS=Canis lupus familiaris GN=DYRK3 PE=4 SV=2 - [E2R8C3_CANLF]    | 1,7  | 1 | 0 | 1 | 1 |
| F1PBL2     | T-cell lymphoma invasion and metastasis 2 OS=Canis lupus familiaris GN=TIAM2 PE=4 SV=2 - [F1PBL2_CANLF]                       | 1,7  | 1 | 1 | 1 | 2 |
| F6UNP7     | Neurofilament medium OS=Canis lupus familiaris GN=NEFM PE=3 SV=1 - [F6UNP7_CANLF]                                             | 1,62 | 1 | 1 | 1 | 1 |
| F1PRS3     | Uncharacterized protein OS=Canis lupus familiaris PE=4 SV=2 - [F1PRS3_CANLF]                                                  | 1,55 | 1 | 0 | 1 | 1 |
| E2R211     | Methyl-CpG binding domain protein 1 (Fragment) OS=Canis lupus familiaris GN=MBD1 PE=4 SV=2 - [E2R211_CANLF]                   | 1,52 | 1 | 0 | 1 | 1 |
| E2RMK4     | Uncharacterized protein OS=Canis lupus familiaris PE=4 SV=2 - [E2RMK4_CANLF]                                                  | 1,51 | 1 | 0 | 1 | 1 |
| L7NON8     | Uncharacterized protein OS=Canis lupus familiaris PE=4 SV=1 - [L7NON8_CANLF]                                                  | 1,5  | 1 | 0 | 1 | 1 |
| E2RK65     | Kelch like family member 8 OS=Canis lupus familiaris GN=KLHL8 PE=4 SV=1 - [E2RK65_CANLF]                                      | 1,46 | 1 | 0 | 1 | 1 |
| J9JHW1     | Uncharacterized protein OS=Canis lupus familiaris PE=4 SV=1 - [J9JHW1_CANLF]                                                  | 1,44 | 1 | 0 | 1 | 1 |
| J9P6U0     | Uncharacterized protein OS=Canis lupus familiaris PE=4 SV=1 - [J9P6U0_CANLF]                                                  | 1,43 | 1 | 0 | 1 | 1 |
| E2R214     | Methyl-CpG binding domain protein 1 OS=Canis lupus familiaris GN=MBD1 PE=4 SV=2 - [E2R214_CANLF]                              | 1,38 | 1 | 0 | 1 | 1 |
| B8K1W7     | ATP-binding cassette protein C4 OS=Canis lupus familiaris GN=ABCC4 PE=2 SV=1 - [B8K1W7_CANLF]                                 | 1,36 | 1 | 0 | 1 | 1 |
| F1PNA2     | ATP binding cassette subfamily C member 4 OS=Canis lupus familiaris GN=ABCC4 PE=4 SV=2 - [F1PNA2_CANLF]                       | 1,36 | 1 | 0 | 1 | 1 |
| F1PB26     | Uncharacterized protein OS=Canis lupus familiaris GN=MRPL33 PE=4 SV=2 - [F1PB26_CANLF]                                        | 1,35 | 1 | 0 | 1 | 1 |
| F1P832     | Alpha-1,4 glucan phosphorylase OS=Canis lupus familiaris GN=PYGM PE=3 SV=2 - [F1P832_CANLF]                                   | 1,31 | 1 | 1 | 1 | 2 |
| E2RBQ6     | Adhesion G protein-coupled receptor B1 OS=Canis lupus familiaris GN=ADGRB1 PE=4 SV=2 - [E2RBQ6_CANLF]                         | 1,28 | 1 | 1 | 1 | 1 |
| J9NV18     | Uncharacterized protein OS=Canis lupus familiaris GN=MRPL33 PE=4 SV=1 - [J9NV18_CANLF]                                        | 1,26 | 1 | 0 | 1 | 1 |
| J9PAI3     | Uncharacterized protein OS=Canis lupus familiaris PE=4 SV=1 - [J9PAI3_CANLF]                                                  | 1,23 | 1 | 1 | 1 | 1 |
| E2R151     | Synemin OS=Canis lupus familiaris GN=SYNM PE=3 SV=2 - [E2R151_CANLF]                                                          | 1,18 | 1 | 1 | 1 | 1 |
| Q32KH2     | Sulfatase 1 OS=Canis lupus familiaris GN=sulf1 PE=2 SV=1 - [Q32KH2_CANLF]                                                     | 1,15 | 1 | 0 | 1 | 1 |
| F1Q233     | Sulfatase 1 OS=Canis lupus familiaris GN=SULF1 PE=4 SV=2 - [F1Q233_CANLF]                                                     | 1,12 | 1 | 0 | 1 | 1 |
| J9P9Y4     | Uncharacterized protein OS=Canis lupus familiaris GN=LOC606788 PE=4 SV=1 - [J9P9Y4_CANLF]                                     | 1,04 | 1 | 0 | 1 | 1 |
| E2R8R6     | Mitochondrial tRNA translation optimization 1 OS=Canis lupus familiaris GN=MTO1 PE=3 SV=1 - [E2R8R6_CANLF]                    | 1,04 | 1 | 1 | 1 | 1 |
| J9PQJ6     | Coiled-coil domain containing 154 OS=Canis lupus familiaris GN=CCDC154 PE=4 SV=1 - [J9PQJ6_CANLF]                             | 1,04 | 1 | 1 | 1 | 3 |

|            |                                                                                                                 |       |   |   |   |    |
|------------|-----------------------------------------------------------------------------------------------------------------|-------|---|---|---|----|
| F1PXV0     | Uncharacterized protein OS=Canis lupus familiaris GN=LOC606788 PE=4 SV=2 - [F1PXV0_CANLF]                       | 1,03  | 1 | 0 | 1 | 1  |
| F1PMX4     | Protein kinase C epsilon type OS=Canis lupus familiaris GN=PRKCE PE=3 SV=2 - [F1PMX4_CANLF]                     | 0,95  | 1 | 1 | 1 | 1  |
| F1PWQ3     | Zinc finger BED-type containing 4 OS=Canis lupus familiaris GN=ZBED4 PE=4 SV=2 - [F1PWQ3_CANLF]                 | 0,86  | 1 | 1 | 1 | 1  |
| J9NYP9     | Ring finger protein 213 OS=Canis lupus familiaris GN=RNFP213 PE=4 SV=1 - [J9NYP9_CANLF]                         | 0,55  | 1 | 0 | 1 | 1  |
| J9POG8     | Intraflagellar transport 122 OS=Canis lupus familiaris GN=IFT122 PE=4 SV=1 - [J9POG8_CANLF]                     | 0,51  | 1 | 1 | 0 | 1  |
| E2RID8     | ATP-dependent RNA helicase DHX29 OS=Canis lupus familiaris GN=DHX29 PE=3 SV=1 - [E2RID8_CANLF]                  | 0,51  | 1 | 0 | 1 | 1  |
| J9P6V4     | ATP-dependent RNA helicase DHX29 OS=Canis lupus familiaris GN=DHX29 PE=3 SV=1 - [J9P6V4_CANLF]                  | 0,51  | 1 | 0 | 1 | 1  |
| E2RL93     | Intraflagellar transport 122 OS=Canis lupus familiaris GN=IFT122 PE=4 SV=2 - [E2RL93_CANLF]                     | 0,48  | 1 | 0 | 1 | 1  |
| F1P8S2     | Uncharacterized protein OS=Canis lupus familiaris PE=4 SV=2 - [F1P8S2_CANLF]                                    | 16,74 | 1 | 1 | 0 | 1  |
| J9P1E0     | Uncharacterized protein OS=Canis lupus familiaris PE=4 SV=1 - [J9P1E0_CANLF]                                    | 12,02 | 1 | 0 | 1 | 1  |
| A0A0E3ZQV0 | SlpA OS=Pasteurella multocida subsp. multocida OH4807 GN=I926_04935 PE=4 SV=1 - [A0A0E3ZQV0_PASMD]              | 10,77 | 1 | 1 | 1 | 1  |
| Q8WMS4     | Peroxisome proliferator-activated receptor-gamma (Fragment) OS=Canis lupus familiaris GN=PPAR-gamma PE=         | 8,8   | 1 | 1 | 1 | 1  |
| E2R4R5     | Somatomedin B and thrombospondin type 1 domain containing OS=Canis lupus familiaris GN=SBSPPON PE=4 SV          | 8,71  | 1 | 1 | 1 | 2  |
| F1PNS9     | GH3 domain containing OS=Canis lupus familiaris GN=GHDC PE=4 SV=2 - [F1PNS9_CANLF]                              | 6,62  | 1 | 1 | 1 | 1  |
| O976Z6     | CD40 ligand OS=Canis lupus familiaris GN=CD40LG PE=2 SV=1 - [CD40L_CANLF]                                       | 6,54  | 1 | 1 | 1 | 1  |
| A0A0A0MPC5 | Trafficking protein particle complex subunit 2 OS=Canis lupus familiaris GN=TRAPPC2 PE=4 SV=1 - [A0A0A0MP       | 6,42  | 1 | 1 | 1 | 1  |
| J9P0D1     | Uncharacterized protein OS=Canis lupus familiaris GN=DUSP15 PE=3 SV=1 - [J9P0D1_CANLF]                          | 5,96  | 1 | 1 | 1 | 1  |
| E2RAG6     | BCL2 associated athanogene 5 OS=Canis lupus familiaris GN=BAG5 PE=4 SV=2 - [E2RAG6_CANLF]                       | 5,69  | 1 | 1 | 1 | 1  |
| J9NTH3     | Uncharacterized protein OS=Canis lupus familiaris PE=4 SV=1 - [J9NTH3_CANLF]                                    | 5,64  | 1 | 0 | 1 | 1  |
| E2RI79     | Cell division cycle 20B OS=Canis lupus familiaris GN=CDC20B PE=4 SV=1 - [E2RI79_CANLF]                          | 5,56  | 1 | 0 | 1 | 2  |
| J9P571     | Uncharacterized protein OS=Canis lupus familiaris PE=4 SV=1 - [J9P571_CANLF]                                    | 5,54  | 1 | 1 | 1 | 1  |
| E2RI78     | Cell division cycle 20B OS=Canis lupus familiaris GN=CDC20B PE=4 SV=2 - [E2RI78_CANLF]                          | 5,28  | 1 | 1 | 1 | 2  |
| J9PAZ9     | Uncharacterized protein OS=Canis lupus familiaris PE=4 SV=1 - [J9PAZ9_CANLF]                                    | 5,08  | 1 | 0 | 1 | 1  |
| F1PIK1     | Family with sequence similarity 69 member C OS=Canis lupus familiaris GN=FAM69C PE=4 SV=2 - [F1PIK1_CAN         | 4,81  | 1 | 1 | 1 | 1  |
| J9P9Q7     | Leucine rich repeat containing 6 OS=Canis lupus familiaris GN=LRRC6 PE=4 SV=1 - [J9P9Q7_CANLF]                  | 4,72  | 1 | 0 | 1 | 1  |
| E2RC46     | Transmembrane protein 252 OS=Canis lupus familiaris GN=TMEM252 PE=4 SV=1 - [E2RC46_CANLF]                       | 4,68  | 1 | 1 | 1 | 1  |
| J9NXJ5     | Olfactory receptor OS=Canis lupus familiaris GN=OR6C6 PE=3 SV=1 - [J9NXJ5_CANLF]                                | 4,52  | 1 | 1 | 1 | 1  |
| E2QYX5     | Solute carrier family 35 member D3 OS=Canis lupus familiaris GN=SLC35D3 PE=4 SV=1 - [E2QYX5_CANLF]              | 4,26  | 1 | 1 | 1 | 1  |
| E2RHU6     | Tyrosine-tRNA ligase OS=Canis lupus familiaris GN=YARS2 PE=3 SV=1 - [E2RHU6_CANLF]                              | 4,19  | 1 | 1 | 1 | 1  |
| F1PX34     | Polypeptide N-acetylglucosaminyltransferase OS=Canis lupus familiaris PE=3 SV=2 - [F1PX34_CANLF]                | 3,95  | 1 | 0 | 1 | 1  |
| L7N0P4     | Keratin 74 OS=Canis lupus familiaris GN=KRT74 PE=3 SV=1 - [L7N0P4_CANLF]                                        | 3,92  | 1 | 1 | 1 | 1  |
| J9P3W3     | Leucine rich repeat containing 6 OS=Canis lupus familiaris GN=LRRC6 PE=4 SV=1 - [J9P3W3_CANLF]                  | 3,91  | 1 | 0 | 1 | 1  |
| F1PZ47     | Eukaryotic translation initiation factor 2 subunit beta OS=Canis lupus familiaris GN=EIF2S2 PE=4 SV=2 - [F1PZ47 | 3,9   | 1 | 1 | 1 | 1  |
| E2RC31     | Leucine rich repeat containing 6 OS=Canis lupus familiaris GN=LRRC6 PE=4 SV=2 - [E2RC31_CANLF]                  | 3,9   | 1 | 0 | 1 | 1  |
| E2RIJ8     | Uncharacterized protein OS=Canis lupus familiaris GN=BBS1 PE=4 SV=1 - [E2RIJ8_CANLF]                            | 3,88  | 1 | 1 | 1 | 1  |
| J9P6W7     | Leucine rich repeat containing 6 OS=Canis lupus familiaris GN=LRRC6 PE=4 SV=1 - [J9P6W7_CANLF]                  | 3,78  | 1 | 0 | 1 | 1  |
| F1PEM3     | Tyrosine-protein kinase OS=Canis lupus familiaris GN=SRMS PE=3 SV=1 - [F1PEM3_CANLF]                            | 3,73  | 1 | 1 | 1 | 2  |
| F1Q3F3     | Polypeptide N-acetylglucosaminyltransferase OS=Canis lupus familiaris GN=LOC102152620 PE=3 SV=2 - [F1Q          | 3,65  | 1 | 0 | 1 | 1  |
| E2RCP9     | Proteasome 26S subunit, non-ATPase 2 OS=Canis lupus familiaris GN=PSMD2 PE=4 SV=1 - [E2RCP9_CANLF]              | 3,63  | 1 | 1 | 1 | 1  |
| P499Z6     | Corticoliberin OS=Canis lupus familiaris GN=CRH PE=2 SV=2 - [CRF_CANLF]                                         | 3,57  | 1 | 0 | 1 | 1  |
| J9P572     | Corticoliberin OS=Canis lupus familiaris GN=CRH PE=4 SV=1 - [J9P572_CANLF]                                      | 3,57  | 1 | 0 | 1 | 1  |
| L7N0S0     | Heat shock protein family A (Hsp70) member 1 like OS=Canis lupus familiaris GN=HSPA1L PE=3 SV=1 - [L7N0S0       | 3,43  | 1 | 0 | 1 | 1  |
| E2REF5     | Cilia and flagella associated protein 70 OS=Canis lupus familiaris GN=CFAP70 PE=4 SV=2 - [E2REF5_CANLF]         | 3,35  | 1 | 0 | 1 | 1  |
| J9NXI9     | Cilia and flagella associated protein 70 OS=Canis lupus familiaris GN=CFAP70 PE=4 SV=1 - [J9NXI9_CANLF]         | 3,3   | 1 | 0 | 1 | 1  |
| J9NYG5     | Uncharacterized protein OS=Canis lupus familiaris GN=LOC484365 PE=4 SV=1 - [J9NYG5_CANLF]                       | 3,23  | 1 | 1 | 1 | 1  |
| F1PWE1     | Plasminogen activator OS=Canis lupus familiaris GN=PLAT PE=3 SV=2 - [F1PWE1_CANLF]                              | 3,19  | 1 | 0 | 1 | 1  |
| E2QWN7     | Lymphocyte cytosolic protein 1 OS=Canis lupus familiaris GN=LCP1 PE=4 SV=1 - [E2QWN7_CANLF]                     | 3,03  | 1 | 1 | 1 | 1  |
| F1PPP8     | BR serine/threonine kinase 1 OS=Canis lupus familiaris GN=BRSK1 PE=4 SV=2 - [F1PPP8_CANLF]                      | 2,91  | 1 | 1 | 1 | 1  |
| F1P6E1     | Complement C1s OS=Canis lupus familiaris GN=C1S PE=3 SV=2 - [F1P6E1_CANLF]                                      | 2,88  | 1 | 1 | 1 | 15 |
| F6XSA9     | Roundabout guidance receptor 4 OS=Canis lupus familiaris GN=ROBO4 PE=4 SV=1 - [F6XSA9_CANLF]                    | 2,88  | 1 | 1 | 1 | 1  |
| F1PVE3     | SAP domain containing ribonucleoprotein OS=Canis lupus familiaris GN=SARNP PE=4 SV=1 - [F1PVE3_CANLF]           | 2,86  | 1 | 0 | 1 | 1  |
| H9GW85     | Uncharacterized protein OS=Canis lupus familiaris GN=LOC100856005 PE=4 SV=2 - [H9GW85_CANLF]                    | 2,81  | 1 | 0 | 1 | 1  |
| E2RT77     | Junction mediating and regulatory protein, p53 cofactor OS=Canis lupus familiaris GN=JMY PE=4 SV=2 - [E2RT7     | 2,76  | 1 | 1 | 1 | 1  |
| J9PAF7     | Anion exchange protein OS=Canis lupus familiaris GN=SLC4A7 PE=3 SV=1 - [J9PAF7_CANLF]                           | 2,67  | 1 | 0 | 1 | 1  |
| E2RSY4     | Fanconi anemia complementation group L OS=Canis lupus familiaris GN=FANCL PE=4 SV=2 - [E2RSY4_CANLF]            | 2,65  | 1 | 1 | 1 | 1  |
| J9NVV4     | Uncharacterized protein OS=Canis lupus familiaris GN=LOC100856005 PE=4 SV=1 - [J9NVV4_CANLF]                    | 2,57  | 1 | 0 | 1 | 1  |
| J9P6T7     | Uncharacterized protein OS=Canis lupus familiaris GN=ARHGEF1 PE=4 SV=1 - [J9P6T7_CANLF]                         | 2,55  | 1 | 0 | 1 | 1  |
| J9P8E3     | Uncharacterized protein OS=Canis lupus familiaris GN=ARHGEF1 PE=4 SV=1 - [J9P8E3_CANLF]                         | 2,46  | 1 | 0 | 1 | 1  |
| F1PTY0     | Anion exchange protein OS=Canis lupus familiaris GN=SLC4A7 PE=3 SV=2 - [F1PTY0_CANLF]                           | 2,43  | 1 | 0 | 1 | 1  |
| F1Q0Q8     | Coiled-coil serine rich protein 2 OS=Canis lupus familiaris GN=CCSER2 PE=4 SV=2 - [F1Q0Q8_CANLF]                | 2,34  | 1 | 1 | 1 | 1  |
| E2RDL8     | Splicing factor 3a subunit 1 OS=Canis lupus familiaris GN=SF3A1 PE=4 SV=1 - [E2RDL8_CANLF]                      | 2,27  | 1 | 1 | 1 | 1  |
| F1Q231     | Reticulon OS=Canis lupus familiaris GN=RTN1 PE=4 SV=2 - [F1Q231_CANLF]                                          | 2,27  | 1 | 0 | 1 | 1  |
| F1Q311     | Uncharacterized protein OS=Canis lupus familiaris GN=LOC611363 PE=4 SV=2 - [F1Q311_CANLF]                       | 2,26  | 1 | 0 | 1 | 1  |
| F1Q2B3     | Reticulon OS=Canis lupus familiaris GN=RTN1 PE=4 SV=2 - [F1Q2B3_CANLF]                                          | 2,24  | 1 | 0 | 1 | 1  |
| A0A0E3V4W2 | Uncharacterized protein OS=Pasteurella multocida subsp. multocida OH4807 GN=I926_07840 PE=4 SV=1 - [A0          | 2,05  | 1 | 1 | 1 | 2  |
| E2QJ2      | Acidic residue methyltransferase 1 OS=Canis lupus familiaris GN=ARMT1 PE=4 SV=1 - [E2QJ2_CANLF]                 | 2,04  | 1 | 1 | 1 | 1  |
| J9P559     | Diphosphoinositol pentakisphosphate kinase 2 OS=Canis lupus familiaris GN=PPIP5K2 PE=3 SV=1 - [J9P559_CAI       | 2,03  | 1 | 0 | 1 | 1  |
| E2RIQ4     | PNN interacting serine and arginine rich protein OS=Canis lupus familiaris GN=PNISR PE=4 SV=2 - [E2RIQ4_CAN     | 1,97  | 1 | 1 | 1 | 1  |
| F1PZ17     | Diphosphoinositol pentakisphosphate kinase 2 OS=Canis lupus familiaris GN=PPIP5K2 PE=3 SV=2 - [F1PZ17_CA        | 1,93  | 1 | 0 | 1 | 1  |
| E2RSY2     | Chloride anion exchanger OS=Canis lupus familiaris GN=SLC26A3 PE=3 SV=2 - [E2RSY2_CANLF]                        | 1,92  | 1 | 0 | 1 | 1  |
| E2RTK4     | DExH-box helicase 34 OS=Canis lupus familiaris GN=DHX34 PE=4 SV=2 - [E2RTK4_CANLF]                              | 1,84  | 1 | 0 | 1 | 1  |
| F1PM57     | Ribosomal modification protein rimK like family member B OS=Canis lupus familiaris GN=RIMKLB PE=4 SV=2 - [      | 1,79  | 1 | 1 | 1 | 1  |
| E2RTK2     | DExH-box helicase 34 OS=Canis lupus familiaris GN=DHX34 PE=4 SV=2 - [E2RTK2_CANLF]                              | 1,78  | 1 | 0 | 1 | 1  |
| F1PYQ9     | Anthrax toxin receptor 1 OS=Canis lupus familiaris GN=ANTXR1 PE=4 SV=2 - [F1PYQ9_CANLF]                         | 1,65  | 1 | 1 | 1 | 1  |
| J9NX38     | Uncharacterized protein OS=Canis lupus familiaris GN=LOC611363 PE=4 SV=1 - [J9NX38_CANLF]                       | 1,65  | 1 | 1 | 1 | 1  |
| E2RSY4     | Chloride anion exchanger OS=Canis lupus familiaris GN=SLC26A3 PE=3 SV=1 - [E2RSY4_CANLF]                        | 1,58  | 1 | 0 | 1 | 1  |
| F1PEK4     | DS cell adhesion molecule like 1 OS=Canis lupus familiaris GN=OSCAML1 PE=4 SV=2 - [F1PEK4_CANLF]                | 1,54  | 1 | 1 | 1 | 1  |
| F1PYB5     | REL proto-oncogene, NF-kB subunit OS=Canis lupus familiaris GN=REL PE=4 SV=2 - [F1PYB5_CANLF]                   | 1,52  | 1 | 1 | 1 | 1  |
| J9P4U4     | PR/SET domain 15 OS=Canis lupus familiaris GN=PRDM15 PE=4 SV=1 - [J9P4U4_CANLF]                                 | 1,49  | 1 | 0 | 1 | 1  |
| J9P9V3     | Ring finger protein 17 OS=Canis lupus familiaris GN=RNFP17 PE=4 SV=1 - [J9P9V3_CANLF]                           | 1,47  | 1 | 0 | 1 | 2  |
| F6XNH4     | Methylenetetrahydrofolate dehydrogenase, cyclohydrolase and formyltetrahydrofolate synthetase 1 OS=Canis        | 1,44  | 1 | 0 | 1 | 1  |
| F1PYY1     | Methylenetetrahydrofolate dehydrogenase, cyclohydrolase and formyltetrahydrofolate synthetase 1 OS=Canis        | 1,42  | 1 | 0 | 1 | 1  |
| E2RIS2     | Ring finger protein 17 OS=Canis lupus familiaris GN=RNFP17 PE=4 SV=2 - [E2RIS2_CANLF]                           | 1,39  | 1 | 0 | 1 | 2  |
| J9NYU9     | Ring finger protein 17 OS=Canis lupus familiaris GN=RNFP17 PE=4 SV=1 - [J9NYU9_CANLF]                           | 1,37  | 1 | 0 | 1 | 2  |
| J9PAT4     | Uncharacterized protein OS=Canis lupus familiaris PE=4 SV=1 - [J9PAT4_CANLF]                                    | 1,36  | 1 | 1 | 1 | 1  |
| F1PFQ1     | Zyg-11 family member B, cell cycle regulator OS=Canis lupus familiaris GN=ZYG11B PE=4 SV=2 - [F1PFQ1_CANL       | 1,36  | 1 | 1 | 1 | 1  |
| E2RS76     | Bloom syndrome RecQ like helicase OS=Canis lupus familiaris GN=BLM PE=4 SV=2 - [E2RS76_CANLF]                   | 1,35  | 1 | 0 | 1 | 1  |
| J9PB86     | Bloom syndrome RecQ like helicase OS=Canis lupus familiaris GN=BLM PE=4 SV=1 - [J9PB86_CANLF]                   | 1,34  | 1 | 0 | 1 | 1  |
| E2RLE0     | Trafficking protein particle complex 9 OS=Canis lupus familiaris GN=TRAPP9 PE=4 SV=2 - [E2RLE0_CANLF]           | 1,31  | 1 | 1 | 1 | 1  |
| F1PNX9     | Neuron navigator 3 OS=Canis lupus familiaris GN=NAV3 PE=4 SV=2 - [F1PNX9_CANLF]                                 | 1,28  | 1 | 0 | 1 | 1  |
| F1PNY1     | Neuron navigator 3 OS=Canis lupus familiaris GN=NAV3 PE=4 SV=2 - [F1PNY1_CANLF]                                 | 1,26  | 1 | 0 | 1 | 1  |
| F1Q3J3     | Bactericidal/permeability-increasing protein OS=Canis lupus familiaris GN=BPI PE=4 SV=2 - [F1Q3J3_CANLF]        | 1,24  | 1 | 0 | 1 | 1  |
| F1PZ05     | Pleckstrin and Sec7 domain containing 3 OS=Canis lupus familiaris GN=PSD3 PE=4 SV=2 - [F1PZ05_CANLF]            | 1,23  | 1 | 1 | 1 | 1  |

|            |                                                                                                                  |       |   |   |   |   |
|------------|------------------------------------------------------------------------------------------------------------------|-------|---|---|---|---|
| A0A0E3ZQ89 | Acetyl-coenzyme A synthetase OS=Pasteurella multocida subsp. multocida OH4807 GN=acsA PE=3 SV=1 - [A0A           | 1,23  | 1 | 1 | 1 | 1 |
| F1PF60     | Chromosome 12 open reading frame 40 OS=Canis lupus familiaris GN=C12orf40 PE=4 SV=2 - [F1PF60_CANLF]             | 1,19  | 1 | 1 | 1 | 1 |
| Q28226     | Mucin OS=Canis lupus familiaris PE=2 SV=1 - [Q28226_CANLF]                                                       | 1,16  | 1 | 1 | 1 | 1 |
| E2RAJ3     | PR/SET domain 15 OS=Canis lupus familiaris GN=PRDM15 PE=4 SV=2 - [E2RAJ3_CANLF]                                  | 1,12  | 1 | 0 | 1 | 1 |
| E2RNS7     | Uncharacterized protein OS=Canis lupus familiaris GN=VPS25 PE=4 SV=2 - [E2RNS7_CANLF]                            | 1,05  | 1 | 0 | 1 | 1 |
| F6UP34     | EF-hand calcium binding domain 6 OS=Canis lupus familiaris GN=EFCAB6 PE=4 SV=1 - [F6UP34_CANLF]                  | 1,03  | 1 | 1 | 1 | 1 |
| E2QWK2     | Polyribonucleotide nucleotidyltransferase 1 OS=Canis lupus familiaris GN=PNPT1 PE=4 SV=2 - [E2QWK2_CANLF]        | 1,01  | 1 | 1 | 1 | 1 |
| J9NV24     | Testis expressed 14, intercellular bridge forming factor OS=Canis lupus familiaris GN=TEX14 PE=4 SV=1 - [J9NV24] | 0,98  | 1 | 0 | 1 | 1 |
| E2RP33     | Testis expressed 14, intercellular bridge forming factor OS=Canis lupus familiaris GN=TEX14 PE=4 SV=2 - [E2RP33] | 0,97  | 1 | 0 | 1 | 1 |
| E2RP34     | Testis expressed 14, intercellular bridge forming factor OS=Canis lupus familiaris GN=TEX14 PE=4 SV=2 - [E2RP34] | 0,94  | 1 | 0 | 1 | 1 |
| F6V2Q3     | Anion exchange protein OS=Canis lupus familiaris GN=SLC4A5 PE=3 SV=1 - [F6V2Q3_CANLF]                            | 0,9   | 1 | 1 | 1 | 1 |
| F1PY87     | CREB binding protein OS=Canis lupus familiaris GN=CREBBP PE=4 SV=1 - [F1PY87_CANLF]                              | 0,89  | 1 | 1 | 1 | 1 |
| J9PB95     | Phospholipid-transporting ATPase OS=Canis lupus familiaris GN=ATP10A PE=3 SV=1 - [J9PB95_CANLF]                  | 0,89  | 1 | 0 | 1 | 1 |
| E2RB85     | Phospholipid-transporting ATPase OS=Canis lupus familiaris GN=ATP10A PE=3 SV=2 - [E2RB85_CANLF]                  | 0,86  | 1 | 0 | 1 | 1 |
| E2R9W6     | Acyl-coenzyme A oxidase OS=Canis lupus familiaris GN=ACOX3 PE=3 SV=1 - [E2R9W6_CANLF]                            | 0,86  | 1 | 0 | 1 | 1 |
| E2RDRO     | SEC31 homolog B, COPII coat complex component OS=Canis lupus familiaris GN=SEC31B PE=4 SV=2 - [E2RDRO]           | 0,85  | 1 | 1 | 1 | 1 |
| E2QWU6     | Zinc finger protein 451 OS=Canis lupus familiaris GN=ZNF451 PE=4 SV=1 - [E2QWU6_CANLF]                           | 0,85  | 1 | 1 | 1 | 1 |
| F1PA39     | Calmodulin regulated spectrin associated protein 1 OS=Canis lupus familiaris GN=CAMSAP1 PE=3 SV=2 - [F1PA39]     | 0,76  | 1 | 1 | 1 | 1 |
| E2R698     | Nuclear receptor coactivator 6 OS=Canis lupus familiaris GN=NCOA6 PE=4 SV=1 - [E2R698_CANLF]                     | 0,73  | 1 | 1 | 1 | 1 |
| E2RNW6     | Uncharacterized protein OS=Canis lupus familiaris GN=VPS25 PE=4 SV=2 - [E2RNW6_CANLF]                            | 0,7   | 1 | 0 | 1 | 1 |
| E2RHB2     | Ubiquitin protein ligase E3 component n-recognin 2 OS=Canis lupus familiaris GN=UBR2 PE=4 SV=2 - [E2RHB2]        | 0,68  | 1 | 0 | 1 | 1 |
| J9PS27     | Ubiquitin protein ligase E3 component n-recognin 2 OS=Canis lupus familiaris GN=UBR2 PE=4 SV=1 - [J9PS27_C]      | 0,68  | 1 | 0 | 1 | 1 |
| F1PUB9     | Elongation factor Tu GTP binding domain containing 2 OS=Canis lupus familiaris GN=EFTUD2 PE=4 SV=2 - [F1PUB9]    | 0,62  | 1 | 0 | 1 | 1 |
| J9PAM3     | YTH domain containing 2 OS=Canis lupus familiaris GN=YTHDC2 PE=4 SV=1 - [J9PAM3_CANLF]                           | 0,6   | 1 | 0 | 1 | 1 |
| F1PP58     | AF4/FMR2 family member 3 OS=Canis lupus familiaris GN=AF3 PE=4 SV=2 - [F1PP58_CANLF]                             | 0,57  | 1 | 0 | 1 | 1 |
| E2R4Q1     | LDL receptor related protein 1 OS=Canis lupus familiaris GN=LRP1 PE=4 SV=2 - [E2R4Q1_CANLF]                      | 0,55  | 1 | 0 | 1 | 1 |
| J9P315     | LDL receptor related protein 1 OS=Canis lupus familiaris GN=LRP1 PE=4 SV=1 - [J9P315_CANLF]                      | 0,55  | 1 | 0 | 1 | 1 |
| F1PP59     | AF4/FMR2 family member 3 OS=Canis lupus familiaris GN=AF3 PE=4 SV=2 - [F1PP59_CANLF]                             | 0,55  | 1 | 0 | 1 | 1 |
| F1PB98     | Neuron navigator 2 OS=Canis lupus familiaris GN=NAV2 PE=4 SV=2 - [F1PB98_CANLF]                                  | 0,54  | 1 | 0 | 1 | 1 |
| F1P9L3     | Neuron navigator 2 OS=Canis lupus familiaris GN=NAV2 PE=4 SV=2 - [F1P9L3_CANLF]                                  | 0,53  | 1 | 0 | 1 | 1 |
| A7YH32     | Cingulin OS=Canis lupus familiaris GN=CGN PE=2 SV=1 - [CING_CANLF]                                               | 0,5   | 1 | 0 | 1 | 2 |
| F1PLU8     | Cingulin OS=Canis lupus familiaris GN=CGN PE=4 SV=2 - [F1PLU8_CANLF]                                             | 0,5   | 1 | 0 | 1 | 2 |
| F1Q2H7     | Kinesin family member 26B OS=Canis lupus familiaris GN=KIF26B PE=3 SV=2 - [F1Q2H7_CANLF]                         | 0,48  | 1 | 0 | 1 | 1 |
| J9PAB8     | Kinesin family member 26B OS=Canis lupus familiaris GN=KIF26B PE=3 SV=1 - [J9PAB8_CANLF]                         | 0,48  | 1 | 0 | 1 | 1 |
| E2RE65     | WNK lysine deficient protein kinase 2 OS=Canis lupus familiaris GN=WNK2 PE=4 SV=2 - [E2RE65_CANLF]               | 0,48  | 1 | 0 | 1 | 1 |
| F1Q3Y6     | WNK lysine deficient protein kinase 1 OS=Canis lupus familiaris GN=WNK1 PE=4 SV=2 - [F1Q3Y6_CANLF]               | 0,47  | 1 | 0 | 1 | 1 |
| J9P404     | WNK lysine deficient protein kinase 1 OS=Canis lupus familiaris GN=WNK1 PE=4 SV=1 - [J9P404_CANLF]               | 0,46  | 1 | 0 | 1 | 1 |
| E2QZ7      | YTH domain containing 2 OS=Canis lupus familiaris GN=YTHDC2 PE=4 SV=2 - [E2QZ7_CANLF]                            | 0,44  | 1 | 0 | 1 | 1 |
| F1PW22     | Myosin heavy chain 7B OS=Canis lupus familiaris GN=MYH7B PE=3 SV=2 - [F1PW22_CANLF]                              | 0,41  | 1 | 1 | 1 | 1 |
| F6XJ3      | Uncharacterized protein OS=Canis lupus familiaris GN=EIF4EBP3 PE=4 SV=1 - [F6XJ3_CANLF]                          | 0,39  | 1 | 0 | 1 | 1 |
| F6XSE4     | Uncharacterized protein OS=Canis lupus familiaris GN=EIF4EBP3 PE=4 SV=1 - [F6XSE4_CANLF]                         | 0,38  | 1 | 0 | 1 | 1 |
| F6XQD6     | Microtubule associated protein 1B OS=Canis lupus familiaris GN=MAP1B PE=4 SV=1 - [F6XQD6_CANLF]                  | 0,27  | 1 | 1 | 1 | 1 |
| F1Q3G0     | WDFY family member 4 OS=Canis lupus familiaris GN=WDFY4 PE=4 SV=2 - [F1Q3G0_CANLF]                               | 0,19  | 1 | 0 | 1 | 1 |
| F1Q3G4     | WDFY family member 4 OS=Canis lupus familiaris GN=WDFY4 PE=4 SV=2 - [F1Q3G4_CANLF]                               | 0,19  | 1 | 0 | 1 | 1 |
| F1PIH9     | HYDIN, axonemal central pair apparatus protein OS=Canis lupus familiaris GN=HYDIN PE=4 SV=2 - [F1PIH9_CANLF]     | 0,12  | 1 | 0 | 1 | 1 |
| J9PAK0     | Uncharacterized protein OS=Canis lupus familiaris PE=4 SV=1 - [J9PAK0_CANLF]                                     | 30,16 | 1 | 1 | 1 | 1 |
| B2CRU9     | p2Y purinoceptor 2 (Fragment) OS=Canis lupus familiaris GN=P2Y2 PE=2 SV=1 - [B2CRU9_CANLF]                       | 20    | 1 | 0 | 1 | 1 |
| E2R0E8     | Sp1A/ryanodine receptor domain and SOCS box containing 4 OS=Canis lupus familiaris GN=SPSB4 PE=4 SV=1 - [E2R0E8] | 14,29 | 1 | 1 | 1 | 1 |
| P52212     | Parathyroid hormone OS=Canis lupus familiaris GN=PTH PE=3 SV=1 - [PTHY_CANLF]                                    | 11,3  | 1 | 1 | 1 | 1 |
| F1PM28     | Uncharacterized protein OS=Canis lupus familiaris PE=4 SV=2 - [F1PM28_CANLF]                                     | 9,71  | 1 | 1 | 1 | 1 |
| F224N8     | Uncharacterized protein OS=Canis lupus familiaris GN=ACTG2 PE=3 SV=1 - [F224N8_CANLF]                            | 9,57  | 1 | 1 | 1 | 1 |
| E2RNV3     | PITH domain containing 1 OS=Canis lupus familiaris GN=PITHD1 PE=4 SV=2 - [E2RNV3_CANLF]                          | 9     | 1 | 1 | 1 | 1 |
| E2RQW8     | Apoptosis inducing factor, mitochondria associated 2 OS=Canis lupus familiaris GN=AIFM2 PE=4 SV=1 - [E2RQW8]     | 5,63  | 1 | 1 | 1 | 1 |
| A0A0E3V4J3 | Glutathione biosynthesis bifunctional protein GshAB OS=Pasteurella multocida subsp. multocida OH4807 GN=gshAB    | 5,54  | 1 | 1 | 1 | 1 |
| F1PAH5     | Uncharacterized protein OS=Canis lupus familiaris GN=CXCR1 PE=3 SV=2 - [F1PAH5_CANLF]                            | 5,03  | 1 | 1 | 1 | 1 |
| E2RLR0     | Cytochrome P450 family 7 subfamily A member 1 OS=Canis lupus familiaris GN=CYP7A1 PE=3 SV=1 - [E2RLR0_CANLF]     | 4,99  | 1 | 0 | 1 | 1 |
| F1P9J8     | HIV-1 Tat interactive protein 2 OS=Canis lupus familiaris GN=HTATIP2 PE=4 SV=2 - [F1P9J8_CANLF]                  | 4,71  | 1 | 1 | 1 | 1 |
| F1PM53     | Uncharacterized protein OS=Canis lupus familiaris GN=LOC100855928 PE=4 SV=2 - [F1PM53_CANLF]                     | 4,58  | 1 | 1 | 1 | 1 |
| F1PXU2     | Pyrophosphatase (inorganic) 2 OS=Canis lupus familiaris GN=PPA2 PE=4 SV=2 - [F1PXU2_CANLF]                       | 4,41  | 1 | 1 | 1 | 1 |
| J9P757     | Cytochrome P450 family 7 subfamily A member 1 OS=Canis lupus familiaris GN=CYP7A1 PE=3 SV=1 - [J9P757_C]         | 4,31  | 1 | 0 | 1 | 1 |
| E2R3Z4     | Nipsnap homolog 3B OS=Canis lupus familiaris GN=NIPSNAP3B PE=4 SV=2 - [E2R3Z4_CANLF]                             | 4,05  | 1 | 1 | 1 | 1 |
| E2R1L5     | Ring finger protein 40 OS=Canis lupus familiaris GN=RNFB40 PE=4 SV=1 - [E2R1L5_CANLF]                            | 4     | 1 | 1 | 1 | 1 |
| E2RBA0     | Tyrosine-protein kinase OS=Canis lupus familiaris GN=TXK PE=3 SV=2 - [E2RBA0_CANLF]                              | 3,99  | 1 | 1 | 1 | 1 |
| E2RDZ5     | Purinergic receptor P2Y2 OS=Canis lupus familiaris GN=P2RY2 PE=3 SV=2 - [E2RDZ5_CANLF]                           | 3,98  | 1 | 1 | 1 | 1 |
| F1PBF6     | Basal body orientation factor 1 OS=Canis lupus familiaris GN=BBOF1 PE=4 SV=2 - [F1PBF6_CANLF]                    | 3,97  | 1 | 1 | 1 | 1 |
| E2QXN9     | Cystathionine beta-synthase OS=Canis lupus familiaris GN=CBS PE=3 SV=2 - [E2QXN9_CANLF]                          | 3,85  | 1 | 1 | 1 | 2 |
| E2QTV5     | Sulfotransferase OS=Canis lupus familiaris GN=HS3ST5 PE=3 SV=1 - [E2QTV5_CANLF]                                  | 3,77  | 1 | 1 | 1 | 1 |
| J9PA32     | Myosin-13 OS=Canis lupus familiaris GN=MYH13 PE=4 SV=1 - [J9PA32_CANLF]                                          | 3,75  | 1 | 0 | 1 | 1 |
| J9NYT2     | KIAA1755 OS=Canis lupus familiaris GN=KIAA1755 PE=4 SV=1 - [J9NYT2_CANLF]                                        | 3,55  | 1 | 0 | 1 | 1 |
| E2QWF5     | Peptidylprolyl isomerase OS=Canis lupus familiaris GN=FKBP4 PE=4 SV=2 - [E2QWF5_CANLF]                           | 3,49  | 1 | 1 | 1 | 1 |
| F6UYL9     | Thyroid hormone receptor interactor 4 OS=Canis lupus familiaris GN=TRIP4 PE=4 SV=1 - [F6UYL9_CANLF]              | 3,27  | 1 | 1 | 1 | 1 |
| E2QRU4     | Syntaxin 10 OS=Canis lupus familiaris GN=STX10 PE=3 SV=1 - [E2QRU4_CANLF]                                        | 3,2   | 1 | 1 | 1 | 1 |
| F1QQR1     | Proteogenin OS=Canis lupus familiaris GN=PRTG PE=4 SV=2 - [F1QQR1_CANLF]                                         | 3,2   | 1 | 1 | 1 | 1 |
| J9NWW8     | Uncharacterized protein OS=Canis lupus familiaris PE=4 SV=1 - [J9NWW8_CANLF]                                     | 2,94  | 1 | 0 | 1 | 1 |
| E2RQ46     | Sp1-1 proto-oncogene OS=Canis lupus familiaris GN=SPI1 PE=3 SV=2 - [E2RQ46_CANLF]                                | 2,8   | 1 | 1 | 1 | 1 |
| E2RH91     | Staphylococcal nuclease and tudor domain containing 1 OS=Canis lupus familiaris GN=SND1 PE=4 SV=2 - [E2RH91]     | 2,53  | 1 | 1 | 1 | 2 |
| E2RLA5     | Golgi membrane protein 1 OS=Canis lupus familiaris GN=GOLM1 PE=4 SV=2 - [E2RLA5_CANLF]                           | 2,46  | 1 | 1 | 1 | 1 |
| F1PWL8     | Uncharacterized protein OS=Canis lupus familiaris PE=4 SV=2 - [F1PWL8_CANLF]                                     | 2,19  | 1 | 1 | 1 | 1 |
| Q32KH1     | Sulfatase 2 OS=Canis lupus familiaris GN=sulf2 PE=2 SV=1 - [Q32KH1_CANLF]                                        | 2,07  | 1 | 1 | 1 | 1 |
| E2RM73     | Discs large MAGUK scaffold protein 2 OS=Canis lupus familiaris GN=DLG2 PE=4 SV=2 - [E2RM73_CANLF]                | 2     | 1 | 1 | 1 | 1 |
| E2R3P0     | NOC2 like nucleolar associated transcriptional repressor OS=Canis lupus familiaris GN=NOC2L PE=4 SV=2 - [E2R3P0] | 1,85  | 1 | 1 | 1 | 1 |
| F1Q417     | KIAA1755 OS=Canis lupus familiaris GN=KIAA1755 PE=4 SV=2 - [F1Q417_CANLF]                                        | 1,84  | 1 | 0 | 1 | 1 |
| F1PBG1     | Phosphoinositide phospholipase C OS=Canis lupus familiaris GN=PLCH1 PE=4 SV=2 - [F1PBG1_CANLF]                   | 1,82  | 1 | 0 | 1 | 1 |
| E2R1U0     | Multiple C2 and transmembrane domain containing 1 OS=Canis lupus familiaris GN=MCTP1 PE=4 SV=2 - [E2R1U0]        | 1,8   | 1 | 1 | 1 | 1 |
| E2REP2     | TRK-fused gene OS=Canis lupus familiaris GN=TFG PE=4 SV=1 - [E2REP2_CANLF]                                       | 1,75  | 1 | 0 | 1 | 1 |
| F1PA82     | Cell wall biogenesis 43 C-terminal homolog OS=Canis lupus familiaris GN=CWH43 PE=4 SV=1 - [F1PA82_CANLF]         | 1,6   | 1 | 1 | 1 | 1 |
| E2RJV1     | Angiomotin OS=Canis lupus familiaris GN=AMOT PE=1 SV=1 - [E2RJV1_CANLF]                                          | 1,57  | 1 | 1 | 1 | 1 |
| J9NWT6     | Integrin subunit alpha L OS=Canis lupus familiaris GN=ITGAL PE=3 SV=1 - [J9NWT6_CANLF]                           | 1,55  | 1 | 0 | 1 | 1 |
| F1PIQ2     | Calcineurin binding protein 1 OS=Canis lupus familiaris GN=CABIN1 PE=4 SV=2 - [F1PIQ2_CANLF]                     | 1,43  | 1 | 0 | 1 | 1 |
| J9NTT6     | Calcineurin binding protein 1 OS=Canis lupus familiaris GN=CABIN1 PE=4 SV=1 - [J9NTT6_CANLF]                     | 1,42  | 1 | 0 | 1 | 1 |
| F1PID2     | Calcineurin binding protein 1 OS=Canis lupus familiaris GN=CABIN1 PE=4 SV=1 - [F1PID2_CANLF]                     | 1,4   | 1 | 0 | 1 | 1 |
| J9NSP8     | STAR related lipid transfer domain containing 8 OS=Canis lupus familiaris GN=STAR8 PE=4 SV=1 - [J9NSP8_CANLF]    | 1,36  | 1 | 0 | 1 | 1 |
| F1PTV7     | Disco interacting protein 2 homolog C OS=Canis lupus familiaris GN=DIP2C PE=4 SV=2 - [F1PTV7_CANLF]              | 1,34  | 1 | 1 | 1 | 1 |



|            |                                                                                                                     |       |   |   |   |   |
|------------|---------------------------------------------------------------------------------------------------------------------|-------|---|---|---|---|
| E2RHE6     | SCY1 like pseudokinase 2 OS=Canis lupus familiaris GN=SCYL2 PE=4 SV=2 - [E2RHE6_CANLF]                              | 1,33  | 1 | 1 | 1 | 1 |
| F1PBG2     | Phosphoinositide phospholipase C OS=Canis lupus familiaris GN=PLCH1 PE=4 SV=2 - [F1PBG2_CANLF]                      | 1,32  | 1 | 0 | 1 | 1 |
| F1P122     | STAR related lipid transfer domain containing 8 OS=Canis lupus familiaris GN=STARD8 PE=4 SV=2 - [F1P122_CANLF]      | 1,27  | 1 | 0 | 1 | 1 |
| F1PKW2     | Receptor-like tyrosine kinase OS=Canis lupus familiaris GN=RYK PE=4 SV=2 - [F1PKW2_CANLF]                           | 1,22  | 1 | 1 | 1 | 1 |
| F1PBJ3     | Uncharacterized protein OS=Canis lupus familiaris GN=LMNA PE=3 SV=1 - [F1PBJ3_CANLF]                                | 1,2   | 1 | 0 | 1 | 1 |
| J9P775     | Bromodomain containing 7 OS=Canis lupus familiaris GN=BRD7 PE=4 SV=1 - [J9P775_CANLF]                               | 1,18  | 1 | 0 | 1 | 1 |
| F1Q3J6     | Tyrosine-protein phosphatase non-receptor type OS=Canis lupus familiaris GN=PTPN11 PE=3 SV=2 - [F1Q3J6_CANLF]       | 1,18  | 1 | 1 | 1 | 1 |
| F6XTA3     | Uncharacterized protein OS=Canis lupus familiaris PE=4 SV=1 - [F6XTA3_CANLF]                                        | 1,12  | 1 | 1 | 1 | 1 |
| F1P9T3     | Regulating synaptic membrane exocytosis 2 OS=Canis lupus familiaris GN=RIMS2 PE=4 SV=2 - [F1P9T3_CANLF]             | 1,08  | 1 | 0 | 1 | 1 |
| J9NSW5     | Uncharacterized protein OS=Canis lupus familiaris GN=LMNA PE=3 SV=1 - [J9NSW5_CANLF]                                | 1,05  | 1 | 0 | 1 | 1 |
| F1P8D8     | Integrin subunit alpha L OS=Canis lupus familiaris GN=ITGAL PE=3 SV=2 - [F1P8D8_CANLF]                              | 1,03  | 1 | 0 | 1 | 1 |
| J9NYS3     | Regulating synaptic membrane exocytosis 2 OS=Canis lupus familiaris GN=RIMS2 PE=4 SV=1 - [J9NYS3_CANLF]             | 0,99  | 1 | 0 | 1 | 1 |
| E2QW89     | Uncharacterized protein OS=Canis lupus familiaris GN=LOC480926 PE=4 SV=1 - [E2QW89_CANLF]                           | 0,94  | 1 | 0 | 1 | 1 |
| F1P726     | Bromodomain containing 7 OS=Canis lupus familiaris GN=BRD7 PE=4 SV=2 - [F1P726_CANLF]                               | 0,92  | 1 | 0 | 1 | 1 |
| J9NT00     | Dynein axonemal heavy chain 3 OS=Canis lupus familiaris GN=DNAH3 PE=4 SV=1 - [J9NT00_CANLF]                         | 0,84  | 1 | 0 | 1 | 1 |
| F1PBB5     | Dynein axonemal heavy chain 3 OS=Canis lupus familiaris GN=DNAH3 PE=4 SV=2 - [F1PBB5_CANLF]                         | 0,83  | 1 | 0 | 1 | 1 |
| J9NWH9     | Dynein axonemal heavy chain 3 OS=Canis lupus familiaris GN=DNAH3 PE=4 SV=1 - [J9NWH9_CANLF]                         | 0,83  | 1 | 0 | 1 | 1 |
| A0A189RMR6 | RNA-dependent RNA polymerase OS=African horse sickness virus 2 GN=VP1 PE=4 SV=1 - [A0A189RMR6_AHSV]                 | 0,77  | 1 | 1 | 1 | 1 |
| J9P1H1     | Utrophin OS=Canis lupus familiaris GN=UTRN PE=4 SV=1 - [J9P1H1_CANLF]                                               | 0,2   | 1 | 0 | 1 | 1 |
| Q5JCF5     | Utrophin OS=Canis lupus familiaris PE=2 SV=1 - [Q5JCF5_CANLF]                                                       | 0,2   | 1 | 0 | 1 | 1 |
| E2RRD8     | Chromosome 1 open reading frame 43 OS=Canis lupus familiaris GN=C1orf43 PE=4 SV=2 - [E2RRD8_CANLF]                  | 14,62 | 1 | 1 | 1 | 1 |
| A0A0E3ZQP1 | Uncharacterized protein OS=Pasteurella multocida subsp. multocida OH4807 GN=I926_09065 PE=3 SV=1 - [A0A0E3ZQP1]     | 11,2  | 1 | 0 | 1 | 1 |
| J9P885     | Translocase of outer mitochondrial membrane 20 like OS=Canis lupus familiaris GN=TOMM20L PE=3 SV=1 - [J9P885]       | 9,93  | 1 | 1 | 1 | 1 |
| B6VCV6     | LEF1 (Fragment) OS=Canis lupus familiaris PE=2 SV=1 - [B6VCV6_CANLF]                                                | 9,73  | 1 | 0 | 1 | 2 |
| J9NU58     | Uncharacterized protein OS=Canis lupus familiaris PE=4 SV=1 - [J9NU58_CANLF]                                        | 8,91  | 1 | 1 | 1 | 1 |
| P86218     | Oligosaccharyltransferase complex subunit OSTC OS=Canis lupus familiaris GN=OSTC PE=1 SV=1 - [OSTC_CANLF]           | 8,72  | 1 | 1 | 1 | 1 |
| A0A0E3ZND1 | Colicin uptake protein TolR OS=Pasteurella multocida subsp. multocida OH4807 GN=I926_02725 PE=3 SV=1 - [A0A0E3ZND1] | 8,57  | 1 | 1 | 1 | 1 |
| J9P853     | 40S ribosomal protein S3a OS=Canis lupus familiaris GN=RPS3A PE=3 SV=1 - [J9P853_CANLF]                             | 7,98  | 1 | 0 | 1 | 1 |
| J9P8N5     | 40S ribosomal protein S3a OS=Canis lupus familiaris GN=RPS3A PE=3 SV=1 - [J9P8N5_CANLF]                             | 7,95  | 1 | 0 | 1 | 1 |
| E2RRB7     | VAMP associated protein B and C OS=Canis lupus familiaris GN=VAPB PE=4 SV=1 - [E2RRB7_CANLF]                        | 7,82  | 1 | 1 | 1 | 1 |
| E2RBM2     | Phosphate cytidyltransferase 1, choline, alpha OS=Canis lupus familiaris GN=PCYT1A PE=4 SV=2 - [E2RBM2_CANLF]       | 7,63  | 1 | 1 | 1 | 1 |
| J9P498     | Serum amyloid A protein OS=Canis lupus familiaris GN=LOC476879 PE=3 SV=1 - [J9P498_CANLF]                           | 6,98  | 1 | 0 | 1 | 1 |
| E2RBD0     | Serum amyloid A protein OS=Canis lupus familiaris GN=LOC476879 PE=3 SV=1 - [E2RBD0_CANLF]                           | 6,92  | 1 | 0 | 1 | 1 |
| Q2VDR4     | Apolipoprotein B (Fragment) OS=Canis lupus GN=APOB PE=4 SV=1 - [Q2VDR4_CANLU]                                       | 6,84  | 1 | 0 | 1 | 1 |
| A0A0K0NQY3 | Capsid protein VP2 OS=Canine parvovirus type 2 PE=4 SV=1 - [A0A0K0NQY3_PAVC]                                        | 5,65  | 1 | 1 | 1 | 1 |
| J9P517     | Clusterin associated protein 1 OS=Canis lupus familiaris GN=CLUAP1 PE=4 SV=1 - [J9P517_CANLF]                       | 5,25  | 1 | 1 | 1 | 1 |
| E7BUQ0     | Beta-type proteasome 7 subunit OS=Canis lupus familiaris GN=P5MB7 PE=2 SV=1 - [E7BUQ0_CANLF]                        | 4,33  | 1 | 1 | 1 | 1 |
| F1Q1X7     | Transcription factor 7 like 2 OS=Canis lupus familiaris GN=TCF7L2 PE=4 SV=2 - [F1Q1X7_CANLF]                        | 4,23  | 1 | 0 | 1 | 2 |
| E2RMH6     | Poly(ADP-ribose) polymerase family member 6 OS=Canis lupus familiaris GN=PARP6 PE=4 SV=2 - [E2RMH6_CANLF]           | 4,22  | 1 | 0 | 1 | 2 |
| E2R9U3     | Delta-like protein OS=Canis lupus familiaris GN=DLL4 PE=4 SV=1 - [E2R9U3_CANLF]                                     | 4,09  | 1 | 1 | 1 | 1 |
| F1P6E4     | Thromboxane A synthase 1 OS=Canis lupus familiaris GN=TBXAS1 PE=3 SV=2 - [F1P6E4_CANLF]                             | 3,75  | 1 | 1 | 1 | 1 |
| F1Q0G5     | WD repeat domain 91 OS=Canis lupus familiaris GN=WDR91 PE=4 SV=2 - [F1Q0G5_CANLF]                                   | 3,31  | 1 | 1 | 1 | 1 |
| E2RMU1     | Histidine decarboxylase OS=Canis lupus familiaris GN=HDC PE=4 SV=1 - [E2RMU1_CANLF]                                 | 3,02  | 1 | 1 | 1 | 1 |
| E2RCD6     | tRNA-splicing ligase RtcB homolog OS=Canis lupus familiaris GN=RTCB PE=3 SV=1 - [E2RCD6_CANLF]                      | 2,97  | 1 | 1 | 1 | 1 |
| E2QZH1     | Tetraspanin OS=Canis lupus familiaris GN=TSpan14 PE=3 SV=1 - [E2QZH1_CANLF]                                         | 2,96  | 1 | 1 | 1 | 1 |
| J9JHB3     | Poly [ADP-ribose] polymerase OS=Canis lupus familiaris GN=PARP6 PE=4 SV=1 - [J9JHB3_CANLF]                          | 2,88  | 1 | 0 | 1 | 2 |
| J9P3M9     | Abraxas 1, BRCA1 A complex subunit OS=Canis lupus familiaris GN=ABRAXAS1 PE=4 SV=1 - [J9P3M9_CANLF]                 | 2,78  | 1 | 0 | 1 | 1 |
| J9P2D2     | HKR1, GLI-Kruppel zinc finger family member OS=Canis lupus familiaris GN=HKR1 PE=3 SV=1 - [J9P2D2_CANLF]            | 2,77  | 1 | 1 | 1 | 1 |
| F1Q334     | Lymphoid enhancer binding factor 1 OS=Canis lupus familiaris GN=LEF1 PE=4 SV=2 - [F1Q334_CANLF]                     | 2,75  | 1 | 0 | 1 | 2 |
| E2QTH7     | Enhancer of polycomb homolog OS=Canis lupus familiaris GN=EPC1 PE=3 SV=1 - [E2QTH7_CANLF]                           | 2,71  | 1 | 0 | 1 | 1 |
| J9NZA2     | Dynamin 1 like OS=Canis lupus familiaris GN=DNM1L PE=3 SV=1 - [J9NZA2_CANLF]                                        | 2,71  | 1 | 0 | 1 | 1 |
| E2RRW8     | Transcription factor 7 OS=Canis lupus familiaris GN=TCF7 PE=4 SV=2 - [E2RRW8_CANLF]                                 | 2,63  | 1 | 0 | 1 | 2 |
| E2QTH5     | Enhancer of polycomb homolog OS=Canis lupus familiaris GN=EPC1 PE=3 SV=1 - [E2QTH5_CANLF]                           | 2,61  | 1 | 0 | 1 | 1 |
| J9NRH1     | Dynamin 1 like OS=Canis lupus familiaris GN=DNM1L PE=3 SV=1 - [J9NRH1_CANLF]                                        | 2,58  | 1 | 0 | 1 | 1 |
| F1PDK6     | Lactase OS=Canis lupus familiaris GN=LCT PE=4 SV=2 - [F1PDK6_CANLF]                                                 | 2,57  | 1 | 1 | 1 | 1 |
| E2QXL2     | Dynamin 1 like OS=Canis lupus familiaris GN=DNM1L PE=3 SV=2 - [E2QXL2_CANLF]                                        | 2,54  | 1 | 0 | 1 | 1 |
| F1Q1X1     | Transcription factor 7 like 2 OS=Canis lupus familiaris GN=TCF7L2 PE=4 SV=2 - [F1Q1X1_CANLF]                        | 2,51  | 1 | 0 | 1 | 2 |
| F1P27      | Uncharacterized protein OS=Canis lupus familiaris GN=LOC490896 PE=4 SV=1 - [F1P27_CANLF]                            | 2,45  | 1 | 1 | 1 | 1 |
| F1PKD8     | Abraxas 1, BRCA1 A complex subunit OS=Canis lupus familiaris GN=ABRAXAS1 PE=4 SV=2 - [F1PKD8_CANLF]                 | 2,44  | 1 | 1 | 1 | 1 |
| F1PYV9     | Transcription factor 7 like 1 OS=Canis lupus familiaris GN=TCF7L1 PE=4 SV=2 - [F1PYV9_CANLF]                        | 2,38  | 1 | 0 | 1 | 2 |
| J9P2V1     | Transcription factor 7 like 2 OS=Canis lupus familiaris GN=TCF7L2 PE=4 SV=1 - [J9P2V1_CANLF]                        | 2,26  | 1 | 0 | 1 | 2 |
| A0A0E3V543 | Cell division protein FtsX OS=Pasteurella multocida subsp. multocida OH4807 GN=ftsX PE=3 SV=1 - [A0A0E3V543]        | 2,25  | 1 | 1 | 1 | 1 |
| E2R957     | Catenin alpha 1 OS=Canis lupus familiaris GN=CTNNA1 PE=4 SV=1 - [E2R957_CANLF]                                      | 2,21  | 1 | 1 | 1 | 1 |
| J9P0N4     | Uncharacterized protein OS=Canis lupus familiaris GN=LOC100855888 PE=4 SV=1 - [J9P0N4_CANLF]                        | 2,18  | 1 | 1 | 1 | 1 |
| E2QXK1     | Transcription factor 7 like 2 OS=Canis lupus familiaris GN=TCF7L2 PE=4 SV=2 - [E2QXK1_CANLF]                        | 2,17  | 1 | 0 | 1 | 2 |
| J9PBB3     | EH domain binding protein 1 like 1 OS=Canis lupus familiaris GN=EHPB1L1 PE=4 SV=1 - [J9PBB3_CANLF]                  | 2,02  | 1 | 0 | 1 | 1 |
| F1PX33     | Transcription factor 7 like 1 OS=Canis lupus familiaris GN=TCF7L1 PE=4 SV=2 - [F1PX33_CANLF]                        | 1,88  | 1 | 0 | 1 | 2 |
| E2RRQ1     | Pendrin OS=Canis lupus familiaris GN=SLC26A4 PE=3 SV=1 - [E2RRQ1_CANLF]                                             | 1,79  | 1 | 1 | 1 | 1 |
| J9NXS4     | SIN3 transcription regulator family member B OS=Canis lupus familiaris GN=SIN3B PE=4 SV=1 - [J9NXS4_CANLF]          | 1,77  | 1 | 0 | 1 | 1 |
| B6SAK7     | RNA-directed RNA polymerase OS=Rotavirus A (isolate RVA/Dog/United States/K9/1981/G3P5A[3]) GN=VP1 PI               | 1,75  | 1 | 0 | 1 | 1 |
| B6SAJ6     | RNA-directed RNA polymerase OS=Rotavirus A (isolate RVA/Dog/United States/Cu-1/1982/G3P5A[3]) GN=VP1                | 1,75  | 1 | 0 | 1 | 1 |
| F1PN34     | SIN3 transcription regulator family member B OS=Canis lupus familiaris GN=SIN3B PE=4 SV=2 - [F1PN34_CANLF]          | 1,73  | 1 | 0 | 1 | 1 |
| F1P798     | Tenascin R OS=Canis lupus familiaris GN=TNR PE=4 SV=2 - [F1P798_CANLF]                                              | 1,69  | 1 | 1 | 1 | 1 |
| E2RNN5     | DNA-directed RNA polymerase subunit beta OS=Canis lupus familiaris GN=POLR2B PE=3 SV=2 - [E2RNN5_CANLF]             | 1,62  | 1 | 1 | 1 | 1 |
| F1PP35     | Aldehyde dehydrogenase 5 family member A1 OS=Canis lupus familiaris GN=ALDH5A1 PE=4 SV=2 - [F1PP35_CANLF]           | 1,58  | 1 | 1 | 1 | 1 |
| F1P907     | Dedicator of cytokinesis 2 OS=Canis lupus familiaris GN=DOCK2 PE=3 SV=2 - [F1P907_CANLF]                            | 1,48  | 1 | 1 | 1 | 1 |
| F1PDU1     | Neogenin 1 OS=Canis lupus familiaris GN=NEO1 PE=4 SV=2 - [F1PDU1_CANLF]                                             | 1,4   | 1 | 0 | 1 | 1 |
| J9P8Y2     | DENN domain containing 5B OS=Canis lupus familiaris GN=DENND5B PE=4 SV=1 - [J9P8Y2_CANLF]                           | 1,39  | 1 | 0 | 1 | 1 |
| F1PQGO     | DENN domain containing 5B OS=Canis lupus familiaris GN=DENND5B PE=4 SV=2 - [F1PQGO_CANLF]                           | 1,38  | 1 | 0 | 1 | 1 |
| J9P2T1     | Neogenin 1 OS=Canis lupus familiaris GN=NEO1 PE=4 SV=1 - [J9P2T1_CANLF]                                             | 1,37  | 1 | 0 | 1 | 1 |
| F1P7S2     | EH domain binding protein 1 like 1 OS=Canis lupus familiaris GN=EHPB1L1 PE=4 SV=2 - [F1P7S2_CANLF]                  | 1,23  | 1 | 0 | 1 | 1 |
| E2REX6     | Myosin binding protein C, slow type OS=Canis lupus familiaris GN=MYBPC1 PE=4 SV=2 - [E2REX6_CANLF]                  | 1,23  | 1 | 1 | 1 | 1 |
| F1PYX6     | IQ motif containing M OS=Canis lupus familiaris GN=IQCM PE=4 SV=2 - [F1PYX6_CANLF]                                  | 1,22  | 1 | 0 | 1 | 1 |
| J9P126     | Phosphoinositide phospholipase C OS=Canis lupus familiaris GN=PLCB1 PE=4 SV=1 - [J9P126_CANLF]                      | 1,12  | 1 | 0 | 1 | 1 |
| E2RH23     | Bromodomain and PHD finger containing 1 OS=Canis lupus familiaris GN=BRPF1 PE=4 SV=1 - [E2RH23_CANLF]               | 1,07  | 1 | 1 | 1 | 1 |
| F1PL90     | Phosphoinositide phospholipase C OS=Canis lupus familiaris GN=PLCB1 PE=4 SV=2 - [F1PL90_CANLF]                      | 1,06  | 1 | 0 | 1 | 1 |
| F6XHG2     | Tubulin tyrosine ligase like 7 OS=Canis lupus familiaris GN=TTLL7 PE=4 SV=1 - [F6XHG2_CANLF]                        | 1,02  | 1 | 0 | 1 | 1 |
| F1PWA8     | Myosin binding protein C, slow type OS=Canis lupus familiaris GN=MYBPC1 PE=4 SV=2 - [F1PWA8_CANLF]                  | 1,02  | 1 | 0 | 1 | 1 |
| E2RLL0     | Tubulin tyrosine ligase like 7 OS=Canis lupus familiaris GN=TTLL7 PE=4 SV=2 - [E2RLL0_CANLF]                        | 1,01  | 1 | 1 | 1 | 1 |
| J9P1E6     | Bromodomain containing 1 OS=Canis lupus familiaris GN=BRD1 PE=4 SV=1 - [J9P1E6_CANLF]                               | 0,99  | 1 | 1 | 1 | 1 |
| E2RT08     | Transcription factor 20 OS=Canis lupus familiaris GN=TCF20 PE=4 SV=1 - [E2RT08_CANLF]                               | 0,97  | 1 | 1 | 1 | 1 |
| J9P2A4     | Ataxin 2 OS=Canis lupus familiaris GN=ATXN2 PE=4 SV=1 - [J9P2A4_CANLF]                                              | 0,96  | 1 | 0 | 1 | 1 |
| F6UUU0     | Ataxin 2 OS=Canis lupus familiaris GN=ATXN2 PE=4 SV=1 - [F6UUU0_CANLF]                                              | 0,92  | 1 | 0 | 1 | 1 |

|            |                                                                                                                                                  |       |   |   |   |   |
|------------|--------------------------------------------------------------------------------------------------------------------------------------------------|-------|---|---|---|---|
| J9P9T2     | Fer-1 like family member 5 OS=Canis lupus familiaris GN=FER1L5 PE=4 SV=1 - [J9P9T2_CANLF]                                                        | 0,86  | 1 | 0 | 1 | 1 |
| F6XRY2     | Uncharacterized protein OS=Canis lupus familiaris GN=EEF2 PE=4 SV=1 - [F6XRY2_CANLF]                                                             | 0,82  | 1 | 1 | 1 | 1 |
| J9P9L3     | Fer-1 like family member 5 OS=Canis lupus familiaris GN=FER1L5 PE=4 SV=1 - [J9P9L3_CANLF]                                                        | 0,78  | 1 | 0 | 1 | 1 |
| E2RDWO     | Fer-1 like family member 5 OS=Canis lupus familiaris GN=FER1L5 PE=4 SV=2 - [E2RDWO_CANLF]                                                        | 0,77  | 1 | 0 | 1 | 1 |
| F1PFL8     | Nucleoporin 214 OS=Canis lupus familiaris GN=NUP214 PE=4 SV=2 - [F1PFL8_CANLF]                                                                   | 0,77  | 1 | 1 | 1 | 1 |
| F1P9S5     | Plexin B2 OS=Canis lupus familiaris GN=PLXNB2 PE=4 SV=2 - [F1P9S5_CANLF]                                                                         | 0,76  | 1 | 1 | 1 | 1 |
| A0A0E3ZPK4 | RecBCD enzyme subunit RecB OS=Pasteurella multocida subsp. multocida OH4807 GN=recB PE=3 SV=1 - [A0A0E3ZPK4]                                     | 0,74  | 1 | 1 | 1 | 1 |
| F6XW55     | Collagen type XII alpha 1 chain OS=Canis lupus familiaris GN=COL12A1 PE=4 SV=1 - [F6XW55_CANLF]                                                  | 0,72  | 1 | 0 | 1 | 1 |
| J9P6G0     | Collagen type XII alpha 1 chain OS=Canis lupus familiaris GN=COL12A1 PE=4 SV=1 - [J9P6G0_CANLF]                                                  | 0,72  | 1 | 0 | 1 | 1 |
| F1P190     | Ankyrin 3 OS=Canis lupus familiaris GN=ANK3 PE=4 SV=2 - [F1P190_CANLF]                                                                           | 0,67  | 1 | 0 | 1 | 1 |
| J9P6X8     | Uncharacterized protein OS=Canis lupus familiaris PE=4 SV=1 - [J9P6X8_CANLF]                                                                     | 0,64  | 1 | 1 | 1 | 1 |
| J9NTT5     | Myosin VC OS=Canis lupus familiaris GN=MYO5C PE=4 SV=1 - [J9NTT5_CANLF]                                                                          | 0,49  | 1 | 0 | 1 | 1 |
| F1P818     | Myosin VC OS=Canis lupus familiaris GN=MYO5C PE=4 SV=2 - [F1P818_CANLF]                                                                          | 0,46  | 1 | 0 | 1 | 1 |
| E2RN56     | Zinc finger CCCH-type containing 13 OS=Canis lupus familiaris GN=ZC3H13 PE=4 SV=2 - [E2RN56_CANLF]                                               | 0,42  | 1 | 1 | 1 | 2 |
| F1P198     | Ankyrin 3 OS=Canis lupus familiaris GN=ANK3 PE=4 SV=2 - [F1P198_CANLF]                                                                           | 0,27  | 1 | 0 | 1 | 1 |
| J9P348     | Proteasome endopeptidase complex OS=Canis lupus familiaris PE=3 SV=1 - [J9P348_CANLF]                                                            | 13,41 | 1 | 1 | 1 | 1 |
| E2RK16     | Achaete-scute family bHLH transcription factor 3 OS=Canis lupus familiaris GN=ASCL3 PE=4 SV=1 - [E2RK16_CANLF]                                   | 13,33 | 1 | 1 | 1 | 1 |
| F1PHB6     | Cystatin A OS=Canis lupus familiaris GN=CSTA PE=4 SV=2 - [F1PHB6_CANLF]                                                                          | 12,24 | 1 | 1 | 1 | 1 |
| F6XMW7     | Ras related GTP binding B OS=Canis lupus familiaris GN=RRAGB PE=4 SV=1 - [F6XMW7_CANLF]                                                          | 9,63  | 1 | 1 | 1 | 1 |
| A0A0E3ZMYS | NAD(P) transhydrogenase subunit alpha OS=Pasteurella multocida subsp. multocida OH4807 GN=pntA PE=3 SV=1 - [A0A0E3ZMYS]                          | 7,66  | 1 | 1 | 1 | 1 |
| J9NSK6     | Uncharacterized protein OS=Canis lupus familiaris GN=DLG3 PE=4 SV=1 - [J9NSK6_CANLF]                                                             | 6,95  | 1 | 1 | 1 | 1 |
| F1PMM9     | Cathepsin L1 OS=Canis lupus familiaris GN=CTSL PE=3 SV=1 - [F1PMM9_CANLF]                                                                        | 6,45  | 1 | 1 | 1 | 1 |
| E2QZS8     | Uncharacterized protein OS=Canis lupus familiaris PE=4 SV=1 - [E2QZS8_CANLF]                                                                     | 5,67  | 1 | 1 | 1 | 1 |
| F1PLM8     | 3-hydroxyisobutyryl-CoA hydrolase, mitochondrial OS=Canis lupus familiaris GN=HIBCH PE=3 SV=2 - [F1PLM8_CANLF]                                   | 5,24  | 1 | 0 | 1 | 3 |
| E2RL58     | 3-hydroxyisobutyryl-CoA hydrolase, mitochondrial OS=Canis lupus familiaris GN=HIBCH PE=3 SV=2 - [E2RL58_CANLF]                                   | 5,21  | 1 | 0 | 1 | 3 |
| J9P3E6     | Zinc finger protein 250 OS=Canis lupus familiaris GN=ZNF250 PE=4 SV=1 - [J9P3E6_CANLF]                                                           | 4,84  | 1 | 1 | 1 | 1 |
| F1Q067     | Septin 7 OS=Canis lupus familiaris GN=SEPT7 PE=3 SV=2 - [F1Q067_CANLF]                                                                           | 4,69  | 1 | 1 | 1 | 1 |
| F1PVT3     | Mastermind like transcriptional coactivator 1 OS=Canis lupus familiaris GN=MAML1 PE=4 SV=2 - [F1PVT3_CANLF]                                      | 4,31  | 1 | 0 | 1 | 2 |
| E2RL53     | Heat shock protein 90 alpha family class B member 1 OS=Canis lupus familiaris GN=HSP90AB1 PE=3 SV=2 - [E2RL53_CANLF]                             | 4,14  | 1 | 1 | 1 | 1 |
| A0A0E3ZPE8 | Glutamine-fructose-6-phosphate aminotransferase [isomerizing] OS=Pasteurella multocida subsp. multocida OH4807 GN=glutA PE=3 SV=1 - [A0A0E3ZPE8] | 4,1   | 1 | 1 | 1 | 1 |
| E2RM53     | Sorting nexin family member 27 OS=Canis lupus familiaris GN=SNX27 PE=4 SV=1 - [E2RM53_CANLF]                                                     | 3,87  | 1 | 1 | 1 | 1 |
| Q9M2V5     | Bone morphogenetic protein 4 (Fragment) OS=Canis lupus familiaris GN=bmp4 PE=3 SV=1 - [Q9M2V5_CANLF]                                             | 3,86  | 1 | 0 | 1 | 1 |
| F1P6M2     | Mastermind like transcriptional coactivator 1 OS=Canis lupus familiaris GN=MAML1 PE=4 SV=2 - [F1P6M2_CANLF]                                      | 3,62  | 1 | 0 | 1 | 2 |
| Q95LA2     | Dimethylaniline monooxygenase [N-oxide-forming] 1 OS=Canis lupus familiaris GN=FMO1 PE=2 SV=3 - [FMO1_CANLF]                                     | 3,38  | 1 | 1 | 1 | 1 |
| F1PVT2     | Mastermind like transcriptional coactivator 1 OS=Canis lupus familiaris GN=MAML1 PE=4 SV=2 - [F1PVT2_CANLF]                                      | 3,32  | 1 | 0 | 1 | 2 |
| F1PDL1     | Uncharacterized protein OS=Canis lupus familiaris GN=BMP4 PE=3 SV=1 - [F1PDL1_CANLF]                                                             | 3,18  | 1 | 0 | 1 | 1 |
| E2RNU4     | DNA helicase OS=Canis lupus familiaris GN=MCM7 PE=3 SV=1 - [E2RNU4_CANLF]                                                                        | 3,06  | 1 | 1 | 1 | 1 |
| F1PGH5     | E2F transcription factor 5 OS=Canis lupus familiaris GN=E2F5 PE=3 SV=1 - [F1PGH5_CANLF]                                                          | 2,91  | 1 | 0 | 1 | 1 |
| O77746     | cGMP-specific 3',5'-cyclic phosphodiesterase OS=Canis lupus familiaris GN=PDE5A PE=2 SV=1 - [PDE5A_CANLF]                                        | 2,89  | 1 | 1 | 1 | 1 |
| J9P811     | Uncharacterized protein OS=Canis lupus familiaris PE=4 SV=1 - [J9P811_CANLF]                                                                     | 2,87  | 1 | 0 | 1 | 4 |
| E2R6D5     | Carnitine palmitoyltransferase 1C OS=Canis lupus familiaris GN=CPT1C PE=3 SV=1 - [E2R6D5_CANLF]                                                  | 2,62  | 1 | 1 | 1 | 1 |
| E2RG74     | Amyloid beta precursor protein binding family A member 1 OS=Canis lupus familiaris GN=APBA1 PE=4 SV=2 - [E2RG74_CANLF]                           | 2,61  | 1 | 0 | 1 | 1 |
| E2RG71     | Amyloid beta precursor protein binding family A member 1 OS=Canis lupus familiaris GN=APBA1 PE=4 SV=2 - [E2RG71_CANLF]                           | 2,54  | 1 | 0 | 1 | 1 |
| E2R246     | Cell division cycle 25B OS=Canis lupus familiaris GN=CDC25B PE=4 SV=1 - [E2R246_CANLF]                                                           | 2,44  | 1 | 0 | 1 | 1 |
| F1P1Y4     | MER proto-oncogene, tyrosine kinase OS=Canis lupus familiaris GN=MERTK PE=3 SV=1 - [F1P1Y4_CANLF]                                                | 2,41  | 1 | 0 | 1 | 1 |
| J9P347     | MER proto-oncogene, tyrosine kinase OS=Canis lupus familiaris GN=MERTK PE=3 SV=1 - [J9P347_CANLF]                                                | 2,41  | 1 | 0 | 1 | 1 |
| J9P5G7     | Uncharacterized protein OS=Canis lupus familiaris PE=4 SV=1 - [J9P5G7_CANLF]                                                                     | 2,39  | 1 | 1 | 1 | 1 |
| F1PYX3     | Cell division cycle 25B OS=Canis lupus familiaris GN=CDC25B PE=4 SV=2 - [F1PYX3_CANLF]                                                           | 2,29  | 1 | 0 | 1 | 1 |
| E2R057     | LUC7 like OS=Canis lupus familiaris GN=LUC7L PE=4 SV=2 - [E2R057_CANLF]                                                                          | 2,16  | 1 | 0 | 1 | 1 |
| F6UQU5     | Uncharacterized protein OS=Canis lupus familiaris GN=LUC7L2 PE=4 SV=1 - [F6UQU5_CANLF]                                                           | 2,05  | 1 | 0 | 1 | 1 |
| E2QTS3     | Uncharacterized protein OS=Canis lupus familiaris GN=LUC7L2 PE=4 SV=1 - [E2QTS3_CANLF]                                                           | 2,04  | 1 | 0 | 1 | 1 |
| J9P2R1     | PR/SET domain 5 OS=Canis lupus familiaris GN=PRDM5 PE=4 SV=1 - [J9P2R1_CANLF]                                                                    | 2     | 1 | 0 | 1 | 1 |
| F1PKR9     | MYB binding protein 1a OS=Canis lupus familiaris GN=MYBBP1A PE=4 SV=2 - [F1PKR9_CANLF]                                                           | 1,99  | 1 | 0 | 1 | 1 |
| F1PML2     | Low density lipoprotein receptor OS=Canis lupus familiaris GN=LDLR PE=4 SV=2 - [F1PML2_CANLF]                                                    | 1,97  | 1 | 0 | 1 | 1 |
| J9NXB0     | Low density lipoprotein receptor OS=Canis lupus familiaris GN=LDLR PE=4 SV=1 - [J9NXB0_CANLF]                                                    | 1,97  | 1 | 0 | 1 | 1 |
| S5U819     | CUL4BY transcript 1 OS=Canis lupus familiaris PE=2 SV=1 - [S5U819_CANLF]                                                                         | 1,96  | 1 | 0 | 1 | 1 |
| J9NRL1     | Zinc finger protein 454 OS=Canis lupus familiaris GN=ZNF454 PE=4 SV=1 - [J9NRL1_CANLF]                                                           | 1,77  | 1 | 0 | 1 | 1 |
| F6UQU5     | Uncharacterized protein OS=Canis lupus familiaris GN=LUC7L2 PE=4 SV=1 - [F6UQU5_CANLF]                                                           | 1,75  | 1 | 0 | 1 | 1 |
| E2RDB9     | Pleckstrin homology like domain family B member 2 OS=Canis lupus familiaris GN=PHLDB2 PE=4 SV=2 - [E2RDB9_CANLF]                                 | 1,74  | 1 | 1 | 1 | 1 |
| J9NU42     | Uncharacterized protein OS=Canis lupus familiaris PE=4 SV=1 - [J9NU42_CANLF]                                                                     | 1,66  | 1 | 0 | 1 | 1 |
| F6XRW3     | Kinesin family member 1C OS=Canis lupus familiaris GN=KIF1C PE=3 SV=1 - [F6XRW3_CANLF]                                                           | 1,6   | 1 | 1 | 1 | 1 |
| E2RSL4     | PR/SET domain 5 OS=Canis lupus familiaris GN=PRDM5 PE=4 SV=2 - [E2RSL4_CANLF]                                                                    | 1,55  | 1 | 0 | 1 | 1 |
| S5THS2     | CUL4BY transcript 2 OS=Canis lupus familiaris PE=2 SV=1 - [S5THS2_CANLF]                                                                         | 1,54  | 1 | 0 | 1 | 1 |
| A0A0E3ZPQ1 | Bifunctional protein PutA OS=Pasteurella multocida subsp. multocida OH4807 GN=i926_00630 PE=3 SV=1 - [A0A0E3ZPQ1]                                | 1,42  | 1 | 1 | 1 | 1 |
| E2RB71     | Ring finger protein 169 OS=Canis lupus familiaris GN=RNF169 PE=4 SV=1 - [E2RB71_CANLF]                                                           | 1,4   | 1 | 1 | 1 | 1 |
| F6XGX8     | APC2, WNT signaling pathway regulator OS=Canis lupus familiaris GN=APC2 PE=4 SV=1 - [F6XGX8_CANLF]                                               | 1,33  | 1 | 1 | 1 | 1 |
| F1PFK4     | Par-3 family cell polarity regulator OS=Canis lupus familiaris GN=PAR3 PE=1 SV=2 - [F1PFK4_CANLF]                                                | 1,31  | 1 | 1 | 1 | 1 |
| E2RBL8     | HECT domain E3 ubiquitin protein ligase 3 OS=Canis lupus familiaris GN=HECTD3 PE=4 SV=2 - [E2RBL8_CANLF]                                         | 1,21  | 1 | 1 | 1 | 1 |
| E2RF27     | UBX domain protein 4 OS=Canis lupus familiaris GN=UBXN4 PE=4 SV=2 - [E2RF27_CANLF]                                                               | 1,18  | 1 | 1 | 1 | 1 |
| F1PZL7     | Transportin 1 OS=Canis lupus familiaris GN=TNPO1 PE=4 SV=2 - [F1PZL7_CANLF]                                                                      | 1,17  | 1 | 1 | 1 | 1 |
| E2RA65     | Tetratricopeptide repeat domain 39C OS=Canis lupus familiaris GN=TTC39C PE=4 SV=1 - [E2RA65_CANLF]                                               | 1,15  | 1 | 0 | 1 | 4 |
| J9NYX5     | Ankyrin repeat and zinc finger domain containing 1 OS=Canis lupus familiaris GN=ANKZF1 PE=4 SV=1 - [J9NYX5_CANLF]                                | 1,11  | 1 | 0 | 1 | 1 |
| E2RH72     | Ankyrin repeat and zinc finger domain containing 1 OS=Canis lupus familiaris GN=ANKZF1 PE=4 SV=2 - [E2RH72_CANLF]                                | 1,07  | 1 | 0 | 1 | 1 |
| E2QXZ0     | Pantothenate kinase 4 OS=Canis lupus familiaris GN=PANK4 PE=3 SV=2 - [E2QXZ0_CANLF]                                                              | 0,78  | 1 | 1 | 1 | 1 |
| E2RRF5     | RNA binding motif protein 19 OS=Canis lupus familiaris GN=RBM19 PE=4 SV=2 - [E2RRF5_CANLF]                                                       | 0,72  | 1 | 1 | 1 | 1 |
| E2RM62     | FAT atypical cadherin 2 OS=Canis lupus familiaris GN=FAT2 PE=4 SV=1 - [E2RM62_CANLF]                                                             | 0,69  | 1 | 1 | 1 | 1 |
| F1PDR4     | Dynein axonemal heavy chain 9 OS=Canis lupus familiaris GN=DNAH9 PE=4 SV=2 - [F1PDR4_CANLF]                                                      | 0,42  | 1 | 1 | 1 | 1 |
| Q8WN22     | DNA-dependent protein kinase catalytic subunit OS=Canis lupus familiaris GN=PRKDC PE=2 SV=1 - [PRKDC_CANLF]                                      | 0,41  | 1 | 0 | 1 | 1 |
| F1Q3H1     | DNA-dependent protein kinase catalytic subunit OS=Canis lupus familiaris GN=PRKDC PE=3 SV=2 - [F1Q3H1_CANLF]                                     | 0,41  | 1 | 0 | 1 | 1 |
| F1PXF9     | Hemicentin 1 OS=Canis lupus familiaris GN=HMCN1 PE=4 SV=2 - [F1PXF9_CANLF]                                                                       | 0,39  | 1 | 0 | 1 | 2 |
| Q56JJ8     | Apolipoprotein E (Fragment) OS=Canis lupus familiaris PE=2 SV=1 - [Q56JJ8_CANLF]                                                                 | 28,3  | 1 | 0 | 1 | 1 |
| Q6B829     | Histone H4 (Fragment) OS=Canis lupus familiaris PE=3 SV=1 - [Q6B829_CANLF]                                                                       | 18,6  | 1 | 0 | 1 | 2 |
| B9A154     | Phosphatidylinositol 3-kinase regulatory subunit alpha (Fragment) OS=Canis lupus familiaris PE=2 SV=1 - [B9A154]                                 | 15,47 | 1 | 0 | 1 | 2 |
| J9NWX3     | Histone H2B OS=Canis lupus familiaris GN=LOC611089 PE=3 SV=1 - [J9NWX3_CANLF]                                                                    | 11,9  | 1 | 0 | 1 | 4 |
| H9GWB1     | Histone H2B OS=Canis lupus familiaris GN=LOC106558265 PE=3 SV=1 - [H9GWB1_CANLF]                                                                 | 11,9  | 1 | 0 | 1 | 4 |
| J9NRF4     | Histone H2B OS=Canis lupus familiaris GN=HIST1H2BJ PE=3 SV=1 - [J9NRF4_CANLF]                                                                    | 11,9  | 1 | 0 | 1 | 4 |
| J9P6S8     | Histone H2B OS=Canis lupus familiaris GN=LOC488303 PE=3 SV=1 - [J9P6S8_CANLF]                                                                    | 11,9  | 1 | 0 | 1 | 4 |
| L7NOL5     | Histone H2B OS=Canis lupus familiaris GN=HIST3H2BB PE=3 SV=1 - [L7NOL5_CANLF]                                                                    | 11,9  | 1 | 0 | 1 | 4 |
| F1P782     | Histone H2B OS=Canis lupus familiaris PE=3 SV=2 - [F1P782_CANLF]                                                                                 | 11,9  | 1 | 0 | 1 | 4 |
| J9P604     | Histone H2B OS=Canis lupus familiaris GN=HIST1H2BB PE=3 SV=1 - [J9P604_CANLF]                                                                    | 11,9  | 1 | 0 | 1 | 4 |
| L7NOC3     | Histone H2B OS=Canis lupus familiaris GN=LOC488253 PE=3 SV=1 - [L7NOC3_CANLF]                                                                    | 11,81 | 1 | 0 | 1 | 4 |
| J9NS47     | Histone H2B OS=Canis lupus familiaris GN=LOC106558265 PE=3 SV=1 - [J9NS47_CANLF]                                                                 | 11,36 | 1 | 0 | 1 | 4 |
| J9PAN7     | Histone H2B OS=Canis lupus familiaris GN=LOC100855574 PE=3 SV=1 - [J9PAN7_CANLF]                                                                 | 11,28 | 1 | 0 | 1 | 4 |

|            |                                                                                                              |       |   |   |   |   |
|------------|--------------------------------------------------------------------------------------------------------------|-------|---|---|---|---|
| E2RNW2     | Histone H2B OS=Canis lupus familiaris GN=LOC488303 PE=3 SV=1 - [E2RNW2_CANLF]                                | 11,19 | 1 | 0 | 1 | 4 |
| J9P086     | Histone H2B OS=Canis lupus familiaris GN=LOC100855574 PE=3 SV=1 - [J9P086_CANLF]                             | 11,19 | 1 | 0 | 1 | 4 |
| E2RNW3     | Histone H2B OS=Canis lupus familiaris GN=LOC488303 PE=3 SV=1 - [E2RNW3_CANLF]                                | 11,11 | 1 | 0 | 1 | 4 |
| J9NX76     | Histone H2B OS=Canis lupus familiaris GN=LOC106558265 PE=3 SV=1 - [J9NX76_CANLF]                             | 11,11 | 1 | 0 | 1 | 4 |
| J9NZE4     | Histone H2B OS=Canis lupus familiaris GN=LOC100855574 PE=3 SV=1 - [J9NZE4_CANLF]                             | 11,11 | 1 | 0 | 1 | 4 |
| L7N0M4     | Histone H2B OS=Canis lupus familiaris GN=LOC106558265 PE=3 SV=1 - [L7N0M4_CANLF]                             | 11,11 | 1 | 0 | 1 | 4 |
| L7N0M5     | Histone H2B OS=Canis lupus familiaris GN=LOC106558265 PE=3 SV=1 - [L7N0M5_CANLF]                             | 11,11 | 1 | 0 | 1 | 4 |
| J9P2Y4     | Histone H2B OS=Canis lupus familiaris GN=HIST2H2BF PE=3 SV=1 - [J9P2Y4_CANLF]                                | 11,03 | 1 | 0 | 1 | 4 |
| J9P533     | Histone H2B OS=Canis lupus familiaris GN=LOC100855574 PE=3 SV=1 - [J9P533_CANLF]                             | 10,87 | 1 | 0 | 1 | 4 |
| J9P8B6     | Histone H2B OS=Canis lupus familiaris GN=LOC100855574 PE=3 SV=1 - [J9P8B6_CANLF]                             | 10,87 | 1 | 0 | 1 | 4 |
| L7N0M7     | Histone H2B OS=Canis lupus familiaris GN=HIST1H2BA PE=3 SV=1 - [L7N0M7_CANLF]                                | 10,79 | 1 | 0 | 1 | 4 |
| J9NYU5     | Histone H2B OS=Canis lupus familiaris GN=LOC100855574 PE=3 SV=1 - [J9NYU5_CANLF]                             | 9,38  | 1 | 0 | 1 | 4 |
| P81709     | Lysozyme C, spleen isozyme OS=Canis lupus familiaris PE=1 SV=1 - [LYSC2_CANLF]                               | 9,23  | 1 | 0 | 1 | 2 |
| J9NTD9     | Histone H2B OS=Canis lupus familiaris PE=3 SV=1 - [J9NTD9_CANLF]                                             | 8,47  | 1 | 0 | 1 | 4 |
| L7N0L3     | Histone H4 OS=Canis lupus familiaris PE=3 SV=1 - [L7N0L3_CANLF]                                              | 8,33  | 1 | 0 | 1 | 2 |
| F1Q2K3     | Olfactory receptor OS=Canis lupus familiaris GN=cOR52P3 PE=3 SV=2 - [F1Q2K3_CANLF]                           | 8,21  | 1 | 1 | 1 | 1 |
| G1K265     | Lysozyme OS=Canis lupus familiaris GN=LYZ PE=2 SV=1 - [G1K265_CANLF]                                         | 8,11  | 1 | 0 | 1 | 2 |
| F2Z4N2     | Histone H4 OS=Canis lupus familiaris GN=HIST1H4A PE=3 SV=1 - [F2Z4N2_CANLF]                                  | 7,77  | 1 | 0 | 1 | 2 |
| J9NRV0     | Histone H4 OS=Canis lupus familiaris PE=3 SV=1 - [J9NRV0_CANLF]                                              | 7,77  | 1 | 0 | 1 | 2 |
| Q9GK59     | Na+/H+ exchanger isoform 1 (Fragment) OS=Canis lupus familiaris GN=NHE1 PE=2 SV=1 - [Q9GK59_CANLF]           | 7,25  | 1 | 0 | 1 | 1 |
| J9NXA7     | Uncharacterized protein OS=Canis lupus familiaris PE=4 SV=1 - [J9NXA7_CANLF]                                 | 5,84  | 1 | 0 | 1 | 1 |
| F1PEH8     | Proline-serine-threonine phosphatase interacting protein 1 OS=Canis lupus familiaris GN=PSTPIP1 PE=4 SV=2 -  | 5,81  | 1 | 1 | 1 | 1 |
| F1PD15     | Mitochondrial calcium uniporter OS=Canis lupus familiaris GN=MCU PE=4 SV=1 - [F1PD15_CANLF]                  | 5,65  | 1 | 1 | 1 | 1 |
| J9NXE7     | Uncharacterized protein OS=Canis lupus familiaris PE=4 SV=1 - [J9NXE7_CANLF]                                 | 5,31  | 1 | 0 | 1 | 1 |
| E2QVP0     | Phospholipase D family member 3 OS=Canis lupus familiaris GN=PLD3 PE=4 SV=1 - [E2QVP0_CANLF]                 | 5,31  | 1 | 1 | 1 | 1 |
| E2RFT8     | Thymocyte selection associated high mobility group box OS=Canis lupus familiaris GN=TOX PE=4 SV=1 - [E2RFT   | 4,94  | 1 | 1 | 1 | 1 |
| F1PQ43     | Acidic leucine-rich nuclear phosphoprotein 32 family member A OS=Canis lupus familiaris GN=ANP32A PE=4 SV    | 4,76  | 1 | 0 | 1 | 1 |
| F1P9Z5     | Scavenger receptor class A member 3 OS=Canis lupus familiaris GN=SCARA3 PE=4 SV=2 - [F1P9Z5_CANLF]           | 4,66  | 1 | 1 | 1 | 1 |
| E2R525     | Rab interacting lysosomal protein OS=Canis lupus familiaris GN=RILP PE=4 SV=2 - [E2R525_CANLF]               | 4,63  | 1 | 1 | 1 | 1 |
| Q8HY67     | Acidic leucine-rich nuclear phosphoprotein 32 family member A OS=Canis lupus familiaris GN=ANP32A PE=2 SV    | 4,42  | 1 | 0 | 1 | 1 |
| E2QSS0     | Interferon regulatory factor 6 OS=Canis lupus familiaris GN=IRF6 PE=3 SV=1 - [E2QSS0_CANLF]                  | 4,33  | 1 | 0 | 1 | 1 |
| E2R2A6     | Retinoic acid receptor beta OS=Canis lupus familiaris GN=RARB PE=3 SV=1 - [E2R2A6_CANLF]                     | 4,24  | 1 | 1 | 1 | 1 |
| F1PUN9     | Acidic nuclear phosphoprotein 32 family member B OS=Canis lupus familiaris GN=ANP32B PE=4 SV=2 - [F1PUN      | 4,21  | 1 | 0 | 1 | 1 |
| J9P5D2     | Uncharacterized protein OS=Canis lupus familiaris PE=4 SV=1 - [J9P5D2_CANLF]                                 | 4,2   | 1 | 0 | 1 | 1 |
| F1PD68     | Interferon regulatory factor 6 OS=Canis lupus familiaris GN=IRF6 PE=3 SV=1 - [F1PD68_CANLF]                  | 4,2   | 1 | 0 | 1 | 1 |
| E2QT51     | Interferon-gamma-inducible GTPase IFGGC1 protein OS=Canis lupus familiaris GN=IFGGC1 PE=4 SV=2 - [E2QT5      | 4,06  | 1 | 1 | 1 | 1 |
| F1PPY4     | Plasminogen activator, urokinase OS=Canis lupus familiaris GN=PLAU PE=3 SV=2 - [F1PPY4_CANLF]                | 3,68  | 1 | 1 | 1 | 1 |
| A0A0E3ZP69 | Ribonuclease HII OS=Pasteurella multocida subsp. multocida OH4807 GN=rnhB PE=3 SV=1 - [A0A0E3ZP69_PAS        | 3,55  | 1 | 1 | 1 | 1 |
| J9PAT2     | Uncharacterized protein OS=Canis lupus familiaris PE=3 SV=1 - [J9PAT2_CANLF]                                 | 3,25  | 1 | 0 | 1 | 1 |
| J9PAH9     | Uncharacterized protein OS=Canis lupus familiaris GN=SOGA3 PE=4 SV=1 - [J9PAH9_CANLF]                        | 3,23  | 1 | 0 | 1 | 1 |
| E2RD03     | Uncharacterized protein OS=Canis lupus familiaris GN=SOGA3 PE=4 SV=1 - [E2RD03_CANLF]                        | 3,17  | 1 | 0 | 1 | 1 |
| F1PX30     | Heart and neural crest derivatives expressed 2 OS=Canis lupus familiaris GN=HAND2 PE=4 SV=2 - [F1PX30_CAN    | 3,15  | 1 | 0 | 1 | 1 |
| O97571     | C-X-C chemokine receptor type 2 OS=Canis lupus familiaris GN=CXCR2 PE=2 SV=1 - [CXCR2_CANLF]                 | 2,81  | 1 | 0 | 1 | 1 |
| F1PAH6     | C-X-C chemokine receptor type 2 OS=Canis lupus familiaris GN=CXCR2 PE=3 SV=2 - [F1PAH6_CANLF]                | 2,79  | 1 | 0 | 1 | 1 |
| F1PC37     | Stabilizer of axonemal microtubules 1 OS=Canis lupus familiaris GN=SAXO1 PE=4 SV=1 - [F1PC37_CANLF]          | 2,74  | 1 | 0 | 1 | 1 |
| F1PC38     | Stabilizer of axonemal microtubules 1 OS=Canis lupus familiaris GN=SAXO1 PE=4 SV=1 - [F1PC38_CANLF]          | 2,74  | 1 | 0 | 1 | 1 |
| E2R2B8     | Uncharacterized protein OS=Canis lupus familiaris GN=ZBTB7C PE=4 SV=1 - [E2R2B8_CANLF]                       | 2,58  | 1 | 1 | 1 | 1 |
| E2RF44     | Transcobalamin 1 OS=Canis lupus familiaris GN=TCN1 PE=4 SV=2 - [E2RF44_CANLF]                                | 2,54  | 1 | 1 | 1 | 3 |
| F1PVV1     | ELAV-like protein OS=Canis lupus familiaris GN=ELAVL3 PE=3 SV=2 - [F1PVV1_CANLF]                             | 2,45  | 1 | 1 | 1 | 3 |
| E2RCC5     | 3-hydroxybutyrate dehydrogenase 1 OS=Canis lupus familiaris GN=BDH1 PE=3 SV=2 - [E2RCC5_CANLF]               | 2,33  | 1 | 1 | 1 | 1 |
| E2RCY8     | Aconitate hydratase, mitochondrial OS=Canis lupus familiaris GN=ACO2 PE=3 SV=1 - [E2RCY8_CANLF]              | 2,3   | 1 | 1 | 1 | 1 |
| F6Y8N2     | TBC1 domain family member 2 OS=Canis lupus familiaris GN=TBC1D2 PE=4 SV=1 - [F6Y8N2_CANLF]                   | 2,27  | 1 | 1 | 1 | 1 |
| O71025     | Core protein VP3 OS=African horse sickness virus 6 GN=S3 PE=2 SV=1 - [VP3_AHSV6]                             | 2,1   | 1 | 1 | 1 | 1 |
| E2R450     | Clathrin heavy chain linker domain-containing protein 1 OS=Canis lupus familiaris GN=CLHC1 PE=4 SV=2 - [E2R4 | 2,05  | 1 | 1 | 1 | 1 |
| E2RNT6     | DNA ligase OS=Canis lupus familiaris GN=LIG3 PE=3 SV=2 - [E2RNT6_CANLF]                                      | 2,03  | 1 | 0 | 1 | 1 |
| J9P597     | DNA ligase OS=Canis lupus familiaris GN=LIG3 PE=3 SV=1 - [J9P597_CANLF]                                      | 1,99  | 1 | 0 | 1 | 1 |
| F1PX06     | Uncharacterized protein OS=Canis lupus familiaris GN=PRG4 PE=4 SV=2 - [F1PX06_CANLF]                         | 1,99  | 1 | 1 | 1 | 2 |
| F1PXE8     | Uncharacterized protein OS=Canis lupus familiaris PE=4 SV=2 - [F1PXE8_CANLF]                                 | 1,97  | 1 | 0 | 1 | 1 |
| E2RRQ2     | Meiotic double-stranded break formation protein 1 OS=Canis lupus familiaris GN=MEI1 PE=4 SV=2 - [E2RRQ2_C    | 1,96  | 1 | 0 | 1 | 1 |
| J9P4P7     | Fidgetin like 1 OS=Canis lupus familiaris GN=FIGLN1 PE=3 SV=1 - [J9P4P7_CANLF]                               | 1,92  | 1 | 1 | 1 | 1 |
| J9P9G8     | Cartilage intermediate layer protein 2 OS=Canis lupus familiaris GN=CILP2 PE=4 SV=1 - [J9P9G8_CANLF]         | 1,87  | 1 | 0 | 1 | 1 |
| E2QUG9     | Transmembrane and tetrahydrocannabinol repeat containing 3 OS=Canis lupus familiaris GN=TMTC3 PE=4 SV=2 - [E | 1,86  | 1 | 1 | 1 | 1 |
| E2RFL9     | Salvador family WW domain containing protein 1 OS=Canis lupus familiaris GN=SAV1 PE=4 SV=2 - [E2RFL9_CAN     | 1,82  | 1 | 1 | 1 | 2 |
| E2RDU7     | Palladin, cytoskeletal associated protein OS=Canis lupus familiaris GN=PALLD PE=4 SV=2 - [E2RDU7_CANLF]      | 1,81  | 1 | 0 | 1 | 1 |
| E2R0D5     | Testis expressed 10 OS=Canis lupus familiaris GN=TEX10 PE=4 SV=1 - [E2R0D5_CANLF]                            | 1,72  | 1 | 1 | 1 | 1 |
| F1PID1     | Sodium/hydrogen exchanger OS=Canis lupus familiaris GN=SLC9A1 PE=3 SV=2 - [F1PID1_CANLF]                     | 1,72  | 1 | 0 | 1 | 1 |
| E2QZ61     | Uncharacterized protein OS=Canis lupus familiaris GN=ATAD3A PE=4 SV=1 - [E2QZ61_CANLF]                       | 1,69  | 1 | 1 | 1 | 1 |
| F1PK81     | Histone deacetylase OS=Canis lupus familiaris GN=HDAC7 PE=3 SV=2 - [F1PK81_CANLF]                            | 1,68  | 1 | 1 | 1 | 1 |
| E2R0L7     | BMP2 inducible kinase OS=Canis lupus familiaris GN=BMP2K PE=4 SV=2 - [E2R0L7_CANLF]                          | 1,67  | 1 | 1 | 1 | 1 |
| J9NXF7     | Uncharacterized protein OS=Canis lupus familiaris PE=4 SV=1 - [J9NXF7_CANLF]                                 | 1,66  | 1 | 1 | 1 | 1 |
| J9P970     | Uncharacterized protein OS=Canis lupus familiaris GN=LOC610614 PE=4 SV=1 - [J9P970_CANLF]                    | 1,65  | 1 | 0 | 1 | 1 |
| F1PZ55     | Palladin, cytoskeletal associated protein OS=Canis lupus familiaris GN=PALLD PE=4 SV=2 - [F1PZ55_CANLF]      | 1,51  | 1 | 0 | 1 | 1 |
| P68947     | Penton protein OS=Canine adenovirus serotype 1 (strain RI261) GN=L2 PE=3 SV=1 - [CAPSP_ADECR]                | 1,47  | 1 | 0 | 1 | 1 |
| P87557     | Penton base protein OS=Canine adenovirus serotype 2 PE=4 SV=1 - [P87557_ADEC2]                               | 1,47  | 1 | 0 | 1 | 1 |
| E2RCP2     | Cartilage intermediate layer protein 2 OS=Canis lupus familiaris GN=CILP2 PE=4 SV=2 - [E2RCP2_CANLF]         | 1,47  | 1 | 0 | 1 | 1 |
| J9P5L6     | Phospholipase D family member 4 OS=Canis lupus familiaris GN=PLD4 PE=4 SV=1 - [J9P5L6_CANLF]                 | 1,43  | 1 | 0 | 1 | 1 |
| E2R269     | Valosin containing protein interacting protein 1 OS=Canis lupus familiaris GN=VCIPI1 PE=4 SV=1 - [E2R269_CAI | 1,39  | 1 | 1 | 1 | 2 |
| F1PRL4     | Phospholipase D family member 4 OS=Canis lupus familiaris GN=PLD4 PE=4 SV=2 - [F1PRL4_CANLF]                 | 1,36  | 1 | 0 | 1 | 1 |
| F6V533     | Structural maintenance of chromosomes 1B OS=Canis lupus familiaris GN=SMC1B PE=4 SV=1 - [F6V533_CANLF]       | 1,3   | 1 | 0 | 1 | 1 |
| F1PJH4     | Uncharacterized protein OS=Canis lupus familiaris GN=LOC610614 PE=4 SV=2 - [F1PJH4_CANLF]                    | 1,26  | 1 | 0 | 1 | 1 |
| A0A0E3ZRM9 | Uncharacterized protein OS=Pasteurella multocida subsp. multocida OH4807 GN=I926_06340 PE=4 SV=1 - [AO/      | 1,19  | 1 | 0 | 1 | 1 |
| E2QRT5     | Structural maintenance of chromosomes protein OS=Canis lupus familiaris GN=SMC1B PE=3 SV=1 - [E2QRT5_C       | 1,13  | 1 | 0 | 1 | 1 |
| F1PR91     | Uncharacterized protein OS=Canis lupus familiaris PE=4 SV=2 - [F1PR91_CANLF]                                 | 1,06  | 1 | 1 | 1 | 2 |
| E2RMT6     | WD repeat domain 3 OS=Canis lupus familiaris GN=WDR3 PE=4 SV=2 - [E2RMT6_CANLF]                              | 1,06  | 1 | 0 | 1 | 1 |
| J9P8Y5     | WD repeat domain 3 OS=Canis lupus familiaris GN=WDR3 PE=4 SV=1 - [J9P8Y5_CANLF]                              | 1,06  | 1 | 0 | 1 | 1 |
| E2R302     | Aminopeptidase OS=Canis lupus familiaris GN=ERAP1 PE=3 SV=1 - [E2R302_CANLF]                                 | 0,96  | 1 | 1 | 1 | 1 |
| S5THR7     | OFD1 (Fragment) OS=Canis lupus familiaris PE=2 SV=1 - [S5THR7_CANLF]                                         | 0,95  | 1 | 1 | 1 | 5 |
| F1PLN6     | Tripartite motif containing 33 OS=Canis lupus familiaris GN=TRIM33 PE=4 SV=2 - [F1PLN6_CANLF]                | 0,9   | 1 | 0 | 1 | 1 |
| F1Q1V0     | Chromosome segregation 1 like OS=Canis lupus familiaris GN=CSE1L PE=4 SV=2 - [F1Q1V0_CANLF]                  | 0,82  | 1 | 1 | 1 | 1 |
| A0A0H4NDU4 | VP1 OS=African horse sickness virus 4 GN=VP1 PE=4 SV=1 - [A0A0H4NDU4_AHSV4]                                  | 0,61  | 1 | 0 | 1 | 1 |
| A0A0U2DCY1 | VP1 OS=African horse sickness virus 8 GN=VP1 PE=4 SV=1 - [A0A0U2DCY1_AHSV8]                                  | 0,61  | 1 | 0 | 1 | 1 |
| A0A0U2DGX2 | RNA-dependent RNA polymerase OS=African horse sickness virus 7 GN=VP1 PE=4 SV=1 - [A0A0U2DGX2_AHSV           | 0,61  | 1 | 0 | 1 | 1 |
| A0A0N6WIG8 | VP1 OS=African horse sickness virus 4 GN=VP1 PE=4 SV=1 - [A0A0N6WIG8_AHSV4]                                  | 0,61  | 1 | 0 | 1 | 1 |

|            |                                                                                                                  |       |   |   |   |    |
|------------|------------------------------------------------------------------------------------------------------------------|-------|---|---|---|----|
| A0A189RMV2 | RNA-dependent RNA polymerase OS=African horse sickness virus 1 GN=VP1 PE=4 SV=1 - [A0A189RMV2_AHSV]              | 0,61  | 1 | 0 | 1 | 1  |
| A0A0N7CXH2 | VP1 OS=African horse sickness virus 1 GN=VP1 PE=4 SV=1 - [A0A0N7CXH2_AHSV1]                                      | 0,61  | 1 | 0 | 1 | 1  |
| A0A0N6W10  | VP1 OS=African horse sickness virus 1 GN=VP1 PE=4 SV=1 - [A0A0N6W10_AHSV1]                                       | 0,61  | 1 | 0 | 1 | 1  |
| A0A189RN06 | RNA-dependent RNA polymerase OS=African horse sickness virus 6 GN=VP1 PE=4 SV=1 - [A0A189RN06_AHSV6]             | 0,61  | 1 | 0 | 1 | 1  |
| A0A189RN02 | RNA-dependent RNA polymerase OS=African horse sickness virus 6 GN=VP1 PE=4 SV=1 - [A0A189RN02_AHSV6]             | 0,61  | 1 | 0 | 1 | 1  |
| A0A0U2DHH7 | VP1 OS=African horse sickness virus 6 GN=VP1 PE=4 SV=1 - [A0A0U2DHH7_AHSV6]                                      | 0,61  | 1 | 0 | 1 | 1  |
| A0A189RN23 | RNA-dependent RNA polymerase OS=African horse sickness virus 8 GN=VP1 PE=4 SV=1 - [A0A189RN23_AHSV8]             | 0,61  | 1 | 0 | 1 | 1  |
| E2RRY0     | Zinc finger FYVE-type containing 16 OS=Canis lupus familiaris GN=ZFYYE16 PE=4 SV=2 - [E2RRY0_CANLF]              | 0,52  | 1 | 1 | 1 | 1  |
| J9NY43     | Fanconi anemia complementation group M OS=Canis lupus familiaris GN=FANCM PE=4 SV=1 - [J9NY43_CANLF]             | 0,4   | 1 | 0 | 1 | 1  |
| E2RNF7     | Fanconi anemia complementation group M OS=Canis lupus familiaris GN=FANCM PE=4 SV=2 - [E2RNF7_CANLF]             | 0,39  | 1 | 0 | 1 | 1  |
| J9P777     | Fanconi anemia complementation group M OS=Canis lupus familiaris GN=FANCM PE=4 SV=1 - [J9P777_CANLF]             | 0,39  | 1 | 0 | 1 | 1  |
| E2RLD7     | WD repeat and FYVE domain containing 3 OS=Canis lupus familiaris GN=WDYF3 PE=4 SV=2 - [E2RLD7_CANLF]             | 0,37  | 1 | 0 | 1 | 1  |
| J9PB38     | WD repeat and FYVE domain containing 3 OS=Canis lupus familiaris GN=WDYF3 PE=4 SV=1 - [J9PB38_CANLF]             | 0,37  | 1 | 0 | 1 | 1  |
| F1P6C6     | Dynein axonemal heavy chain 5 OS=Canis lupus familiaris GN=DNAH5 PE=4 SV=2 - [F1P6C6_CANLF]                      | 0,15  | 1 | 0 | 1 | 3  |
| F1P6D8     | Dynein axonemal heavy chain 5 OS=Canis lupus familiaris GN=DNAH5 PE=4 SV=2 - [F1P6D8_CANLF]                      | 0,15  | 1 | 0 | 1 | 3  |
| E2RF02     | Ubiquitin protein ligase E3 component n-recognin 4 OS=Canis lupus familiaris GN=UBR4 PE=4 SV=1 - [E2RF02_C]      | 0,12  | 1 | 1 | 1 | 1  |
| Q38QA2     | Actin (Fragment) OS=Canis lupus familiaris PE=2 SV=1 - [Q38QA2_CANLF]                                            | 25,45 | 1 | 0 | 1 | 1  |
| A0A0E3V486 | Uncharacterized protein OS=Pasteurella multocida subsp. multocida OH4807 GN=I926_05125 PE=4 SV=1 - [A0A0E3V486]  | 21,69 | 1 | 1 | 1 | 1  |
| F1Q3U1     | Chromosome 8 open reading frame 46 OS=Canis lupus familiaris GN=C8orf46 PE=4 SV=2 - [F1Q3U1_CANLF]               | 15,27 | 1 | 1 | 1 | 2  |
| A0A0E3ZRB3 | Hypoxanthine phosphoribosyltransferase OS=Pasteurella multocida subsp. multocida OH4807 GN=I926_06285            | 15,08 | 1 | 1 | 1 | 1  |
| Q9S156     | Olfactory receptor-like protein OLF3 OS=Canis lupus familiaris PE=3 SV=1 - [OLF3_CANLF]                          | 9,15  | 1 | 0 | 1 | 1  |
| F1PGN0     | Olfactory receptor OS=Canis lupus familiaris GN=LOC100687207 PE=3 SV=2 - [F1PGN0_CANLF]                          | 9,15  | 1 | 0 | 1 | 1  |
| J9NV11     | T-cell immunoglobulin and mucin domain containing 4 OS=Canis lupus familiaris GN=TIMD4 PE=4 SV=1 - [J9NV11]      | 8,61  | 1 | 1 | 1 | 1  |
| F1PXI3     | Uncharacterized protein OS=Canis lupus familiaris PE=4 SV=2 - [F1PXI3_CANLF]                                     | 8,26  | 1 | 1 | 1 | 31 |
| E2RF61     | Microtubule associated protein RP/EB family member 2 OS=Canis lupus familiaris GN=MAPRE2 PE=4 SV=2 - [E2RF61]    | 7,9   | 1 | 1 | 1 | 1  |
| F6UXI8     | Inosine-5'-monophosphate dehydrogenase OS=Canis lupus familiaris GN=IMPDH2 PE=3 SV=1 - [F6UXI8_CANLF]            | 7,76  | 1 | 1 | 1 | 1  |
| A0A0E3V4H4 | Uncharacterized protein OS=Pasteurella multocida subsp. multocida OH4807 GN=I926_08925 PE=4 SV=1 - [A0A0E3V4H4]  | 7,19  | 1 | 1 | 1 | 1  |
| E2RJN1     | Adaptor related protein complex 3 mu 1 subunit OS=Canis lupus familiaris GN=AP3M1 PE=3 SV=1 - [E2RJN1_CA]        | 6,9   | 1 | 1 | 1 | 1  |
| J9P426     | PIH1 domain containing 2 OS=Canis lupus familiaris GN=PIHD2 PE=4 SV=1 - [J9P426_CANLF]                           | 6,07  | 1 | 1 | 1 | 1  |
| E2RKJ3     | Serine/threonine-protein kinase receptor OS=Canis lupus familiaris GN=ACVR1 PE=3 SV=1 - [E2RKJ3_CANLF]           | 5,97  | 1 | 1 | 1 | 1  |
| J9P848     | Tyrosine-protein phosphatase OS=Canis lupus familiaris GN=PTPRN2 PE=4 SV=1 - [J9P848_CANLF]                      | 4,7   | 1 | 1 | 1 | 1  |
| E2RFU7     | Flavin-containing monooxygenase OS=Canis lupus familiaris GN=LOC478994 PE=3 SV=1 - [E2RFU7_CANLF]                | 3,89  | 1 | 1 | 1 | 1  |
| A0A0E3V3F8 | Uroporphyrinogen decarboxylase OS=Pasteurella multocida subsp. multocida OH4807 GN=hemE PE=3 SV=1 - [A0A0E3V3F8] | 3,67  | 1 | 1 | 1 | 1  |
| F1PAY5     | Mothers against decapentaplegic homolog OS=Canis lupus familiaris GN=SMAD4 PE=3 SV=2 - [F1PAY5_CANLF]            | 3,62  | 1 | 1 | 1 | 1  |
| F1Q1E1     | Lamin B2 OS=Canis lupus familiaris GN=LMNB2 PE=3 SV=2 - [F1Q1E1_CANLF]                                           | 3,34  | 1 | 1 | 1 | 2  |
| Q2KNA0     | Cytospin-A OS=Canis lupus familiaris GN=SPECC1L PE=2 SV=1 - [CYTSA_CANLF]                                        | 2,86  | 1 | 1 | 1 | 1  |
| E2RRT2     | Prospero homeobox 2 OS=Canis lupus familiaris GN=PROX2 PE=4 SV=2 - [E2RRT2_CANLF]                                | 2,85  | 1 | 1 | 1 | 1  |
| J9NSL9     | Sciellin OS=Canis lupus familiaris GN=SCEL PE=4 SV=1 - [J9NSL9_CANLF]                                            | 2,76  | 1 | 1 | 1 | 1  |
| E2QWJ5     | PX domain containing serine/threonine kinase like OS=Canis lupus familiaris GN=PXX PE=4 SV=2 - [E2QWJ5_CA]       | 2,75  | 1 | 1 | 1 | 1  |
| F1PXC4     | Ubiquitin specific peptidase 28 OS=Canis lupus familiaris GN=USP28 PE=3 SV=2 - [F1PXC4_CANLF]                    | 2,73  | 1 | 0 | 1 | 1  |
| P01874     | Ig mu chain C region OS=Canis lupus familiaris PE=1 SV=1 - [IGHM_CANLF]                                          | 2,67  | 1 | 0 | 1 | 1  |
| F1PXC1     | Ubiquitin specific peptidase 28 OS=Canis lupus familiaris GN=USP28 PE=3 SV=2 - [F1PXC1_CANLF]                    | 2,59  | 1 | 0 | 1 | 1  |
| F1PFB3     | Glutaredoxin 3 OS=Canis lupus familiaris GN=GLRX3 PE=4 SV=2 - [F1PFB3_CANLF]                                     | 2,4   | 1 | 1 | 1 | 1  |
| J9P9L6     | PX domain containing serine/threonine kinase like OS=Canis lupus familiaris GN=PXX PE=4 SV=1 - [J9P9L6_CAN]      | 2,35  | 1 | 0 | 1 | 1  |
| F1PEH6     | NEDD4 binding protein 1 OS=Canis lupus familiaris GN=N4BP1 PE=4 SV=2 - [F1PEH6_CANLF]                            | 2,35  | 1 | 1 | 1 | 2  |
| J9NX93     | Sodium channel protein OS=Canis lupus familiaris GN=SCN5A PE=3 SV=1 - [J9NX93_CANLF]                             | 2,29  | 1 | 0 | 1 | 1  |
| F1PFN4     | N(alpha)-acetyltransferase 15, NatA auxiliary subunit OS=Canis lupus familiaris GN=NAA15 PE=4 SV=2 - [F1PFN4]    | 2,24  | 1 | 1 | 1 | 1  |
| J9NTM1     | Guanine monophosphate synthase OS=Canis lupus familiaris GN=GMPS PE=4 SV=1 - [J9NTM1_CANLF]                      | 2,23  | 1 | 0 | 1 | 1  |
| F1PQF9     | Anoctamin OS=Canis lupus familiaris GN=ANO1 PE=3 SV=2 - [F1PQF9_CANLF]                                           | 2,18  | 1 | 0 | 1 | 1  |
| F1PGU3     | Sodium channel protein OS=Canis lupus familiaris GN=SCN5A PE=3 SV=2 - [F1PGU3_CANLF]                             | 2,14  | 1 | 0 | 1 | 1  |
| Q865W3     | Sodium channel protein OS=Canis lupus familiaris GN=scn5A PE=2 SV=1 - [Q865W3_CANLF]                             | 2,14  | 1 | 0 | 1 | 1  |
| F1P9U2     | Guanine monophosphate synthase OS=Canis lupus familiaris GN=GMPS PE=4 SV=2 - [F1P9U2_CANLF]                      | 2,13  | 1 | 0 | 1 | 1  |
| A0A0E3V391 | Alpha-1,4 glucan phosphorylase OS=Pasteurella multocida subsp. multocida OH4807 GN=I926_00420 PE=3 SV=1          | 1,96  | 1 | 1 | 1 | 1  |
| F1PEB3     | Uncharacterized protein OS=Canis lupus familiaris GN=TCAF2 PE=4 SV=2 - [F1PEB3_CANLF]                            | 1,96  | 1 | 1 | 1 | 1  |
| J9NYW6     | Mov10 RISC complex RNA helicase like 1 OS=Canis lupus familiaris GN=MOV10L1 PE=4 SV=1 - [J9NYW6_CANLF]           | 1,86  | 1 | 0 | 1 | 1  |
| F1PU34     | Cysteinyl-tRNA synthetase OS=Canis lupus familiaris GN=CARS PE=3 SV=2 - [F1PU34_CANLF]                           | 1,81  | 1 | 1 | 1 | 1  |
| F1P7K2     | AF4/FMR2 family member 2 OS=Canis lupus familiaris GN=AFF2 PE=4 SV=2 - [F1P7K2_CANLF]                            | 1,8   | 1 | 0 | 1 | 1  |
| E2R1J7     | Mov10 RISC complex RNA helicase like 1 OS=Canis lupus familiaris GN=MOV10L1 PE=4 SV=2 - [E2R1J7_CANLF]           | 1,73  | 1 | 0 | 1 | 1  |
| F1P9B2     | SWAP switching B-cell complex subunit 70 OS=Canis lupus familiaris GN=SWAP70 PE=4 SV=2 - [F1P9B2_CANLF]          | 1,71  | 1 | 1 | 1 | 1  |
| J9NZK5     | Lysyl oxidase OS=Canis lupus familiaris GN=LOX PE=4 SV=1 - [J9NZK5_CANLF]                                        | 1,71  | 1 | 0 | 1 | 2  |
| F6XXW3     | ClpB homolog, mitochondrial AAA ATPase chaperonin OS=Canis lupus familiaris GN=CLPB PE=4 SV=1 - [F6XXW3]         | 1,7   | 1 | 1 | 1 | 1  |
| F1PJX3     | Uncharacterized protein OS=Canis lupus familiaris GN=LOC100688697 PE=3 SV=2 - [F1PJX3_CANLF]                     | 1,61  | 1 | 1 | 1 | 1  |
| E2RHQ0     | Aldehyde dehydrogenase 1 family member B1 OS=Canis lupus familiaris GN=ALDH1B1 PE=3 SV=2 - [E2RHQ0_C]            | 1,56  | 1 | 0 | 1 | 2  |
| F1Q2T5     | AF4/FMR2 family member 2 OS=Canis lupus familiaris GN=AFF2 PE=4 SV=2 - [F1Q2T5_CANLF]                            | 1,55  | 1 | 0 | 1 | 1  |
| J9P229     | Phosphodiesterase OS=Canis lupus familiaris GN=PDE9A PE=3 SV=1 - [J9P229_CANLF]                                  | 1,5   | 1 | 0 | 1 | 1  |
| F1PBB2     | Tetratricopeptide repeat domain 3 OS=Canis lupus familiaris GN=TTTC3 PE=4 SV=2 - [F1PBB2_CANLF]                  | 1,45  | 1 | 1 | 1 | 1  |
| F1PK98     | Multiple EGF like domains 11 OS=Canis lupus familiaris GN=MEGF11 PE=4 SV=2 - [F1PK98_CANLF]                      | 1,44  | 1 | 0 | 1 | 1  |
| F1PJ47     | Phosphodiesterase OS=Canis lupus familiaris GN=PDE9A PE=3 SV=2 - [F1PJ47_CANLF]                                  | 1,39  | 1 | 0 | 1 | 1  |
| F1PKX3     | Nidogen 1 OS=Canis lupus familiaris GN=NID1 PE=4 SV=2 - [F1PKX3_CANLF]                                           | 1,37  | 1 | 1 | 1 | 1  |
| F1PNL7     | Oxysterol-binding protein OS=Canis lupus familiaris GN=OSBPL6 PE=3 SV=2 - [F1PNL7_CANLF]                         | 1,36  | 1 | 1 | 1 | 1  |
| F1PK96     | Multiple EGF like domains 11 OS=Canis lupus familiaris GN=MEGF11 PE=4 SV=2 - [F1PK96_CANLF]                      | 1,32  | 1 | 0 | 1 | 1  |
| E2RDB1     | Leucine zipper protein 1 OS=Canis lupus familiaris GN=LUZP1 PE=4 SV=1 - [E2RDB1_CANLF]                           | 1,3   | 1 | 1 | 1 | 1  |
| F1PNK9     | Cytochrome P450 family 4 subfamily B member 1 OS=Canis lupus familiaris GN=CYP4B1 PE=3 SV=2 - [F1PNK9_C]         | 1,17  | 1 | 1 | 1 | 1  |
| F1PML1     | Uncharacterized protein OS=Canis lupus familiaris GN=LOC480571 PE=3 SV=2 - [F1PML1_CANLF]                        | 1,09  | 1 | 1 | 1 | 1  |
| E2RHX5     | FERM and PDZ domain containing 1 OS=Canis lupus familiaris GN=FRMPD1 PE=4 SV=2 - [E2RHX5_CANLF]                  | 1,08  | 1 | 1 | 1 | 1  |
| F1PND4     | Uncharacterized protein OS=Canis lupus familiaris GN=TNRC6B PE=4 SV=2 - [F1PND4_CANLF]                           | 1,04  | 1 | 0 | 1 | 1  |
| F1Q4D2     | Elastin microfibril interfacer 3 OS=Canis lupus familiaris GN=EMILIN3 PE=4 SV=2 - [F1Q4D2_CANLF]                 | 1,04  | 1 | 0 | 1 | 1  |
| F1PUV5     | Rho guanine nucleotide exchange factor 37 OS=Canis lupus familiaris GN=ARHGEF37 PE=4 SV=2 - [F1PUV5_CAI]         | 1,04  | 1 | 1 | 1 | 2  |
| E2RKX1     | Interleukin 18 receptor accessory protein OS=Canis lupus familiaris GN=IL18RAP PE=4 SV=2 - [E2RKX1_CANLF]        | 1,03  | 1 | 1 | 1 | 1  |
| J9NXD6     | Uncharacterized protein OS=Canis lupus familiaris GN=TNRC6B PE=4 SV=1 - [J9NXD6_CANLF]                           | 0,98  | 1 | 0 | 1 | 1  |
| E2RR98     | Elastin microfibril interfacer 3 OS=Canis lupus familiaris GN=EMILIN3 PE=4 SV=1 - [E2RR98_CANLF]                 | 0,91  | 1 | 0 | 1 | 1  |
| F1Q154     | Carnitine palmitoyltransferase 2 OS=Canis lupus familiaris GN=CPT2 PE=3 SV=2 - [F1Q154_CANLF]                    | 0,87  | 1 | 1 | 1 | 1  |
| F1PLW8     | CUB and Sushi multiple domains 3 OS=Canis lupus familiaris GN=CSDM3 PE=4 SV=2 - [F1PLW8_CANLF]                   | 0,84  | 1 | 1 | 1 | 1  |
| J9JHC8     | Uncharacterized protein OS=Canis lupus familiaris GN=TNRC6B PE=4 SV=1 - [J9JHC8_CANLF]                           | 0,81  | 1 | 0 | 1 | 1  |
| E2R0W5     | Uncharacterized protein OS=Canis lupus familiaris GN=LOC102157092 PE=4 SV=2 - [E2R0W5_CANLF]                     | 0,8   | 1 | 1 | 1 | 1  |
| E2RHZ2     | DNA-directed RNA polymerase subunit beta OS=Canis lupus familiaris GN=POLR3B PE=3 SV=1 - [E2RHZ2_CANL]           | 0,79  | 1 | 1 | 1 | 1  |
| J9NWES     | Ubinuclein 2 OS=Canis lupus familiaris GN=UBN2 PE=4 SV=1 - [J9NWES_CANLF]                                        | 0,76  | 1 | 0 | 1 | 1  |
| F6V8V7     | Ubinuclein 2 OS=Canis lupus familiaris GN=UBN2 PE=4 SV=1 - [F6V8V7_CANLF]                                        | 0,75  | 1 | 0 | 1 | 1  |
| F1PF36     | Zinc finger homeobox 2 OS=Canis lupus familiaris GN=ZFHX2 PE=4 SV=2 - [F1PF36_CANLF]                             | 0,7   | 1 | 1 | 1 | 1  |
| F1PJPO     | Ectonucleotide pyrophosphatase/phosphodiesterase 1 OS=Canis lupus familiaris GN=ENPP1 PE=4 SV=2 - [F1PJPO]       | 0,66  | 1 | 1 | 1 | 1  |
| J9P3E2     | Sodium channel protein OS=Canis lupus familiaris GN=SCN1A PE=3 SV=1 - [J9P3E2_CANLF]                             | 0,64  | 1 | 0 | 1 | 1  |
| J9P355     | Ryanodine receptor 3 OS=Canis lupus familiaris GN=RYP3 PE=4 SV=1 - [J9P355_CANLF]                                | 0,6   | 1 | 0 | 1 | 1  |
| F1PXD7     | Sodium channel protein OS=Canis lupus familiaris GN=SCN1A PE=3 SV=2 - [F1PXD7_CANLF]                             | 0,6   | 1 | 0 | 1 | 1  |

|            |                                                                                                          |       |   |   |   |   |
|------------|----------------------------------------------------------------------------------------------------------|-------|---|---|---|---|
| F1PJL2     | Ryanodine receptor 3 OS=Canis lupus familiaris GN=RYP3 PE=4 SV=2 - [F1PJL2_CANLF]                        | 0,58  | 1 | 0 | 1 | 1 |
| J9P7M0     | Ligand dependent nuclear receptor corepressor OS=Canis lupus familiaris GN=LCOR PE=4 SV=1 - [J9P7M0_CAN  | 0,56  | 1 | 1 | 1 | 2 |
| E2R8N9     | WD repeat domain 87 OS=Canis lupus familiaris GN=WDR87 PE=4 SV=2 - [E2R8N9_CANLF]                        | 0,55  | 1 | 1 | 1 | 1 |
| F1PUQ9     | Cilia and flagella associated protein 43 OS=Canis lupus familiaris GN=CFAP43 PE=4 SV=2 - [F1PUQ9_CANLF]  | 0,42  | 1 | 0 | 1 | 1 |
| F1PUR0     | Cilia and flagella associated protein 43 OS=Canis lupus familiaris GN=CFAP43 PE=4 SV=2 - [F1PUR0_CANLF]  | 0,42  | 1 | 0 | 1 | 1 |
| J9NVH4     | Cilia and flagella associated protein 43 OS=Canis lupus familiaris GN=CFAP43 PE=4 SV=1 - [J9NVH4_CANLF]  | 0,42  | 1 | 0 | 1 | 1 |
| E2QWM4     | Spectrin beta, non-erythrocytic 4 OS=Canis lupus familiaris GN=SPTBN4 PE=4 SV=1 - [E2QWM4_CANLF]         | 0,27  | 1 | 0 | 1 | 2 |
| E2RDK8     | Chromodomain helicase DNA binding protein 9 OS=Canis lupus familiaris GN=CHD9 PE=4 SV=1 - [E2RDK8_CANI   | 0,24  | 1 | 0 | 1 | 1 |
| F1PWD8     | Chromodomain helicase DNA binding protein 7 OS=Canis lupus familiaris GN=CHD7 PE=4 SV=2 - [F1PWD8_CAN    | 0,23  | 1 | 0 | 1 | 1 |
| J9PB22     | Histone H3 OS=Canis lupus familiaris GN=HIST1H3F PE=3 SV=1 - [J9PB22_CANLF]                              | 23,53 | 1 | 1 | 1 | 1 |
| F1Q249     | Uncharacterized protein OS=Canis lupus familiaris GN=LOC106557533 PE=4 SV=2 - [F1Q249_CANLF]             | 14,14 | 1 | 0 | 1 | 2 |
| Q95407     | Dqb1 protein (Fragment) OS=Canis lupus familiaris GN=dqb1 PE=2 SV=1 - [Q95407_CANLF]                     | 13,46 | 1 | 0 | 1 | 1 |
| F1PLY9     | Uncharacterized protein OS=Canis lupus familiaris GN=LOC102155424 PE=3 SV=2 - [F1PLY9_CANLF]             | 12,07 | 1 | 0 | 1 | 2 |
| F1PQN5     | Cofilin 1 OS=Canis lupus familiaris GN=CFL1 PE=3 SV=2 - [F1PQN5_CANLF]                                   | 12,05 | 1 | 0 | 1 | 4 |
| J9POG4     | Uncharacterized protein OS=Canis lupus familiaris PE=4 SV=1 - [J9POG4_CANLF]                             | 11,58 | 1 | 1 | 1 | 1 |
| A0A0E3ZQJ2 | Shikimate 5-dehydrogenase OS=Pasteurella multocida subsp. multocida OH4807 GN=I926_08475 PE=4 SV=1 -     | 11,07 | 1 | 1 | 1 | 1 |
| F1Q1C8     | Uncharacterized protein OS=Canis lupus familiaris PE=3 SV=2 - [F1Q1C8_CANLF]                             | 10,36 | 1 | 0 | 1 | 4 |
| Q95HI5     | MHC class II antigen (Fragment) OS=Canis lupus GN=Calu-DRB PE=4 SV=1 - [Q95HI5_CANLU]                    | 10,14 | 1 | 0 | 1 | 1 |
| J9NZQ2     | Mesoderm posterior bHLH transcription factor 2 OS=Canis lupus familiaris GN=MESP2 PE=4 SV=1 - [J9NZQ2_Ca | 9,59  | 1 | 1 | 1 | 1 |
| O19253     | MHC class II antigen (Fragment) OS=Canis lupus familiaris GN=DRB PE=4 SV=1 - [O19253_CANLF]              | 8,86  | 1 | 0 | 1 | 1 |
| Q30426     | MHC class II antigen (Fragment) OS=Canis lupus familiaris GN=DRB1 PE=4 SV=1 - [Q30426_CANLF]             | 8,86  | 1 | 0 | 1 | 1 |
| O19254     | MHC class II antigen (Fragment) OS=Canis lupus familiaris GN=DRB PE=4 SV=1 - [O19254_CANLF]              | 8,86  | 1 | 0 | 1 | 1 |
| O19249     | MHC class II antigen (Fragment) OS=Canis lupus familiaris GN=DQB PE=4 SV=1 - [O19249_CANLF]              | 8,43  | 1 | 0 | 1 | 1 |
| E2RAM9     | Sulfotransferase OS=Canis lupus familiaris GN=SULT1C4 PE=3 SV=2 - [E2RAM9_CANLF]                         | 8,25  | 1 | 1 | 1 | 1 |
| A0A0K0KQ53 | MHC class II antigen (Fragment) OS=Canis lupus familiaris GN=DLA-DRB1 PE=4 SV=1 - [A0A0K0KQ53_CANLF]     | 8,24  | 1 | 0 | 1 | 1 |
| A0A0K0KPW8 | MHC class II antigen (Fragment) OS=Canis lupus familiaris GN=DLA-DRB1 PE=4 SV=1 - [A0A0K0KPW8_CANLF]     | 8,24  | 1 | 0 | 1 | 1 |
| B2ZWI5     | MHC class II antigen (Fragment) OS=Canis lupus familiaris GN=DLA-DRB1 PE=4 SV=1 - [B2ZWI5_CANLF]         | 7,87  | 1 | 0 | 1 | 1 |
| C4PLD2     | MHC class II antigen (Fragment) OS=Canis lupus familiaris GN=DLA-DRB1 PE=4 SV=1 - [C4PLD2_CANLF]         | 7,87  | 1 | 0 | 1 | 1 |
| C4PLD3     | MHC class II antigen (Fragment) OS=Canis lupus familiaris GN=DLA-DRB1 PE=4 SV=1 - [C4PLD3_CANLF]         | 7,87  | 1 | 0 | 1 | 1 |
| D8MJ29     | MHC class II antigen (Fragment) OS=Canis lupus familiaris GN=DLA-DRB1 PE=4 SV=1 - [D8MJ29_CANLF]         | 7,87  | 1 | 0 | 1 | 1 |
| G3FMN6     | MHC class II antigen beta chain (Fragment) OS=Canis lupus familiaris GN=DLA-DRB1 PE=4 SV=1 - [G3FMN6_CA  | 7,87  | 1 | 0 | 1 | 1 |
| G5D4Z8     | MHC class II antigen (Fragment) OS=Canis lupus familiaris GN=DLA-DRB1 PE=4 SV=1 - [G5D4Z8_CANLF]         | 7,87  | 1 | 0 | 1 | 1 |
| G5D4Z9     | MHC class II antigen (Fragment) OS=Canis lupus familiaris GN=DLA-DRB1 PE=4 SV=1 - [G5D4Z9_CANLF]         | 7,87  | 1 | 0 | 1 | 1 |
| G5D500     | MHC class II antigen (Fragment) OS=Canis lupus familiaris GN=DLA-DRB1 PE=4 SV=1 - [G5D500_CANLF]         | 7,87  | 1 | 0 | 1 | 1 |
| G5D513     | MHC class II antigen (Fragment) OS=Canis lupus familiaris GN=DLA-DRB1 PE=4 SV=1 - [G5D513_CANLF]         | 7,87  | 1 | 0 | 1 | 1 |
| G5D515     | MHC class II antigen (Fragment) OS=Canis lupus familiaris GN=DLA-DRB1 PE=4 SV=1 - [G5D515_CANLF]         | 7,87  | 1 | 0 | 1 | 1 |
| G5D516     | MHC class II antigen (Fragment) OS=Canis lupus familiaris GN=DLA-DRB1 PE=4 SV=1 - [G5D516_CANLF]         | 7,87  | 1 | 0 | 1 | 1 |
| G5D517     | MHC class II antigen (Fragment) OS=Canis lupus familiaris GN=DLA-DRB1 PE=4 SV=1 - [G5D517_CANLF]         | 7,87  | 1 | 0 | 1 | 1 |
| G5D520     | MHC class II antigen (Fragment) OS=Canis lupus familiaris GN=DLA-DRB1 PE=4 SV=1 - [G5D520_CANLF]         | 7,87  | 1 | 0 | 1 | 1 |
| Q8MHR6     | MHC class II antigen (Fragment) OS=Canis lupus familiaris GN=DLA-DRB1 PE=4 SV=1 - [Q8MHR6_CANLF]         | 7,87  | 1 | 0 | 1 | 1 |
| G5D537     | MHC class II antigen (Fragment) OS=Canis lupus familiaris GN=DLA-DRB1 PE=4 SV=1 - [G5D537_CANLF]         | 7,87  | 1 | 0 | 1 | 1 |
| Q9TQP1     | MHC class II antigen (Fragment) OS=Canis lupus familiaris GN=DLA-DRB1 PE=4 SV=1 - [Q9TQP1_CANLF]         | 7,87  | 1 | 0 | 1 | 1 |
| G5D545     | MHC class II antigen (Fragment) OS=Canis lupus familiaris GN=DLA-DRB1 PE=4 SV=1 - [G5D545_CANLF]         | 7,87  | 1 | 0 | 1 | 1 |
| G8XQN5     | MHC class II antigen (Fragment) OS=Canis lupus familiaris GN=DLA-DRB1 PE=4 SV=1 - [G8XQN5_CANLF]         | 7,87  | 1 | 0 | 1 | 1 |
| G8XQP1     | MHC class II antigen (Fragment) OS=Canis lupus familiaris GN=DLA-DRB1 PE=4 SV=1 - [G8XQP1_CANLF]         | 7,87  | 1 | 0 | 1 | 1 |
| G8XQP2     | MHC class II antigen (Fragment) OS=Canis lupus familiaris GN=DLA-DRB1 PE=4 SV=1 - [G8XQP2_CANLF]         | 7,87  | 1 | 0 | 1 | 1 |
| G8XQP9     | MHC class II antigen (Fragment) OS=Canis lupus familiaris GN=DLA-DRB1 PE=4 SV=1 - [G8XQP9_CANLF]         | 7,87  | 1 | 0 | 1 | 1 |
| G8XQQ4     | MHC class II antigen (Fragment) OS=Canis lupus familiaris GN=DLA-DRB1 PE=4 SV=1 - [G8XQQ4_CANLF]         | 7,87  | 1 | 0 | 1 | 1 |
| G8XQQ5     | MHC class II antigen (Fragment) OS=Canis lupus familiaris GN=DLA-DRB1 PE=4 SV=1 - [G8XQQ5_CANLF]         | 7,87  | 1 | 0 | 1 | 1 |
| G8XQR0     | MHC class II antigen (Fragment) OS=Canis lupus familiaris GN=DLA-DRB1 PE=4 SV=1 - [G8XQR0_CANLF]         | 7,87  | 1 | 0 | 1 | 1 |
| G8XQR1     | MHC class II antigen (Fragment) OS=Canis lupus familiaris GN=DLA-DRB1 PE=4 SV=1 - [G8XQR1_CANLF]         | 7,87  | 1 | 0 | 1 | 1 |
| IOCHI7     | MHC class II antigen (Fragment) OS=Canis lupus familiaris GN=DLA-DRB1 PE=4 SV=1 - [IOCHI7_CANLF]         | 7,87  | 1 | 0 | 1 | 1 |
| IOCHI9     | MHC class II antigen (Fragment) OS=Canis lupus familiaris GN=DLA-DRB1 PE=4 SV=1 - [IOCHI9_CANLF]         | 7,87  | 1 | 0 | 1 | 1 |
| IOCHJ0     | MHC class II antigen (Fragment) OS=Canis lupus familiaris GN=DLA-DRB1 PE=4 SV=1 - [IOCHJ0_CANLF]         | 7,87  | 1 | 0 | 1 | 1 |
| O62926     | Major histocompatibility complex class II DLA-DRB1 (Fragment) OS=Canis lupus familiaris GN=DLA-DRB1*1503 | 7,87  | 1 | 0 | 1 | 1 |
| O62931     | Major histocompatibility complex class II DLA-DRB1 (Fragment) OS=Canis lupus familiaris GN=DLA-DRB1*2501 | 7,87  | 1 | 0 | 1 | 1 |
| O78112     | MHC class II DLA-DQ beta chain b1 domain (Fragment) OS=Canis lupus familiaris GN=DLA-DQB1 PE=4 SV=1 - [  | 7,87  | 1 | 0 | 1 | 1 |
| Q19D42     | MHC class II antigen beta chain (Fragment) OS=Canis lupus familiaris GN=DLA-DRB1 PE=4 SV=1 - [Q19D42_CAN | 7,87  | 1 | 0 | 1 | 1 |
| Q1JRY8     | MHC class II antigen (Fragment) OS=Canis lupus familiaris GN=DLA-DRB1 PE=4 SV=1 - [Q1JRY8_CANLF]         | 7,87  | 1 | 0 | 1 | 1 |
| Q1JRY9     | MHC class II antigen (Fragment) OS=Canis lupus familiaris GN=DLA-DRB1 PE=4 SV=1 - [Q1JRY9_CANLF]         | 7,87  | 1 | 0 | 1 | 1 |
| Q2WCC8     | MHC class II antigen (Fragment) OS=Canis lupus familiaris GN=DLA-DRB1 PE=4 SV=1 - [Q2WCC8_CANLF]         | 7,87  | 1 | 0 | 1 | 1 |
| Q2WCD4     | MHC class II antigen (Fragment) OS=Canis lupus familiaris GN=DLA-DRB1 PE=4 SV=1 - [Q2WCD4_CANLF]         | 7,87  | 1 | 0 | 1 | 1 |
| Q30411     | DLA-DR beta (Fragment) OS=Canis lupus familiaris GN=DLA-DRB1 PE=4 SV=1 - [Q30411_CANLF]                  | 7,87  | 1 | 0 | 1 | 1 |
| Q860T8     | MHC class II antigen beta chain (Fragment) OS=Canis lupus familiaris GN=DLA-DRB1 PE=4 SV=1 - [Q860T8_CAN | 7,87  | 1 | 0 | 1 | 1 |
| Q95HP3     | MHC class II antigen (Fragment) OS=Canis lupus familiaris GN=DLA-DQB1 PE=4 SV=1 - [Q95HP3_CANLF]         | 7,87  | 1 | 0 | 1 | 1 |
| Q95HQ6     | MHC class II antigen (Fragment) OS=Canis lupus familiaris GN=DLA-DRB1 PE=4 SV=1 - [Q95HQ6_CANLF]         | 7,87  | 1 | 0 | 1 | 1 |
| Q95HQ9     | MHC class II antigen (Fragment) OS=Canis lupus familiaris GN=DLA-DRB1 PE=4 SV=1 - [Q95HQ9_CANLF]         | 7,87  | 1 | 0 | 1 | 1 |
| Q9BD70     | MHC class II antigen beta chain (Fragment) OS=Canis lupus familiaris GN=DLA-DRB1 PE=4 SV=1 - [Q9BD70_CAN | 7,87  | 1 | 0 | 1 | 1 |
| Q9BD81     | MHC class II antigen beta chain (Fragment) OS=Canis lupus familiaris GN=DLA-DQB1 PE=4 SV=1 - [Q9BD81_CA  | 7,87  | 1 | 0 | 1 | 1 |
| Q9GIW0     | MHC class II antigen beta chain (Fragment) OS=Canis lupus familiaris GN=DLA-DQB1 PE=4 SV=1 - [Q9GIW0_CA  | 7,87  | 1 | 0 | 1 | 1 |
| Q2WCD6     | MHC class II antigen (Fragment) OS=Canis lupus familiaris GN=DLA-DRB1 PE=4 SV=1 - [Q2WCD6_CANLF]         | 7,87  | 1 | 0 | 1 | 1 |
| Q1AN76     | MHC class II antigen (Fragment) OS=Canis lupus familiaris GN=DRB1 PE=4 SV=1 - [Q1AN76_CANLF]             | 7,87  | 1 | 0 | 1 | 1 |
| J7ICR9     | MHC class II antigen (Fragment) OS=Canis lupus GN=DLA-DRB1 PE=4 SV=1 - [J7ICR9_CANLU]                    | 7,87  | 1 | 0 | 1 | 1 |
| Q8MGV3     | MHC class II antigen (Fragment) OS=Canis lupus GN=DLA-DRB1 PE=4 SV=1 - [Q8MGV3_CANLU]                    | 7,87  | 1 | 0 | 1 | 1 |
| Q9BD66     | MHC class II antigen beta chain (Fragment) OS=Canis lupus GN=DLA-DRB1 PE=4 SV=1 - [Q9BD66_CANLU]         | 7,87  | 1 | 0 | 1 | 1 |
| A5HXN8     | MHC class II antigen (Fragment) OS=Canis lupus GN=DLA-DRB1 PE=4 SV=1 - [A5HXN8_CANLU]                    | 7,87  | 1 | 0 | 1 | 1 |
| Q8MGV2     | MHC class II antigen (Fragment) OS=Canis lupus GN=Calu-DRB1 PE=4 SV=1 - [Q8MGV2_CANLU]                   | 7,87  | 1 | 0 | 1 | 1 |
| A5HXN7     | MHC class II antigen (Fragment) OS=Canis lupus GN=DLA-DRB1 PE=4 SV=1 - [A5HXN7_CANLU]                    | 7,87  | 1 | 0 | 1 | 1 |
| Q1AN75     | MHC class II antigen (Fragment) OS=Canis lupus familiaris GN=DRB1 PE=4 SV=1 - [Q1AN75_CANLF]             | 7,87  | 1 | 0 | 1 | 1 |
| G3FMN7     | MHC class II antigen beta chain (Fragment) OS=Canis lupus familiaris GN=DLA-DRB1 PE=4 SV=1 - [G3FMN7_CA  | 7,69  | 1 | 0 | 1 | 1 |
| G3FMP2     | MHC class II antigen beta chain (Fragment) OS=Canis lupus familiaris GN=DLA-DRB1 PE=4 SV=1 - [G3FMP2_CA  | 7,69  | 1 | 0 | 1 | 1 |
| G3FMP3     | MHC class II antigen beta chain (Fragment) OS=Canis lupus familiaris GN=DLA-DRB1 PE=4 SV=1 - [G3FMP3_CA  | 7,69  | 1 | 0 | 1 | 1 |
| E2QZ99     | BRX1, biogenesis of ribosomes OS=Canis lupus familiaris GN=BRX1 PE=4 SV=1 - [E2QZ99_CANLF]               | 7,49  | 1 | 1 | 1 | 1 |
| Q8MHQ8     | MHC class II antigen (Fragment) OS=Canis lupus familiaris GN=DLA-DRB1 PE=4 SV=1 - [Q8MHQ8_CANLF]         | 7,14  | 1 | 0 | 1 | 1 |
| A2SXS8     | Ret proto-oncogene (Fragment) OS=Canis lupus familiaris GN=RET PE=2 SV=1 - [A2SXS8_CANLF]                | 6,67  | 1 | 0 | 1 | 1 |
| F1PIJ5     | Uncharacterized protein OS=Canis lupus familiaris GN=LOC100685341 PE=4 SV=2 - [F1PIJ5_CANLF]             | 6,61  | 1 | 1 | 1 | 1 |
| J9P587     | Uncharacterized protein OS=Canis lupus familiaris GN=LOC102152567 PE=4 SV=1 - [J9P587_CANLF]             | 6,37  | 1 | 1 | 1 | 1 |
| F1PKR6     | Ribosomal protein S16 OS=Canis lupus familiaris GN=RPS16 PE=3 SV=2 - [F1PKR6_CANLF]                      | 5,63  | 1 | 1 | 1 | 2 |
| J9NZ44     | Uncharacterized protein OS=Canis lupus familiaris PE=4 SV=1 - [J9NZ44_CANLF]                             | 5,62  | 1 | 1 | 1 | 1 |
| C7G0Q9     | Recombination activating gene 1 (Fragment) OS=Canis lupus GN=rag1 PE=4 SV=1 - [C7G0Q9_CANLU]             | 5,49  | 1 | 1 | 1 | 1 |
| J9P5L8     | Mesoderm posterior bHLH transcription factor 1 OS=Canis lupus familiaris GN=MESP1 PE=4 SV=1 - [J9P5L8_CA | 5,28  | 1 | 1 | 1 | 1 |
| F1PJS1     | Tyrosine-protein kinase OS=Canis lupus familiaris GN=ZAP70 PE=3 SV=2 - [F1PJS1_CANLF]                    | 5,25  | 1 | 1 | 1 | 1 |
| A0A0E3V3D2 | Protein DaCa OS=Pasteurella multocida subsp. multocida OH4807 GN=I926_04245 PE=3 SV=1 - [A0A0E3V3D2_     | 4,57  | 1 | 1 | 1 | 1 |

|            |                                                                                                              |       |   |   |   |   |
|------------|--------------------------------------------------------------------------------------------------------------|-------|---|---|---|---|
| E2RCN2     | Vaccinia related kinase 1 OS=Canis lupus familiaris GN=VRK1 PE=3 SV=2 - [E2RCN2_CANLF]                       | 4,56  | 1 | 1 | 1 | 1 |
| J9NZG4     | Uncharacterized protein OS=Canis lupus familiaris PE=4 SV=1 - [J9NZG4_CANLF]                                 | 4,49  | 1 | 1 | 1 | 1 |
| F1P8X0     | Membrane palmitoylated protein 7 OS=Canis lupus familiaris GN=MPP7 PE=3 SV=2 - [F1P8X0_CANLF]                | 4,34  | 1 | 1 | 1 | 3 |
| J9NXA4     | FERM, ARH/RhoGEF and pleckstrin domain protein 2 OS=Canis lupus familiaris GN=FARP2 PE=4 SV=1 - [J9NXA4      | 4,25  | 1 | 0 | 1 | 1 |
| E2RLI2     | Angiogenic factor with G-patch and FHA domains 1 OS=Canis lupus familiaris GN=AGGF1 PE=4 SV=2 - [E2RLI2_     | 3,8   | 1 | 1 | 1 | 1 |
| E2R9S2     | E3 ubiquitin-protein ligase RNF168 OS=Canis lupus familiaris GN=RNF168 PE=3 SV=1 - [E2R9S2_CANLF]            | 3,68  | 1 | 1 | 1 | 1 |
| J9P3Q8     | Par-6 family cell polarity regulator alpha OS=Canis lupus familiaris GN=PAR6A PE=4 SV=1 - [J9P3Q8_CANLF]     | 3,31  | 1 | 1 | 1 | 1 |
| E2RBH7     | Uncharacterized protein OS=Canis lupus familiaris GN=NOL4 PE=4 SV=2 - [E2RBH7_CANLF]                         | 3,13  | 1 | 1 | 1 | 1 |
| F1PZJ9     | Coiled-coil domain containing 152 OS=Canis lupus familiaris GN=CCDC152 PE=4 SV=2 - [F1PZJ9_CANLF]            | 3,04  | 1 | 1 | 1 | 1 |
| E2RB31     | Hypoxia up-regulated 1 OS=Canis lupus familiaris GN=HYOU1 PE=3 SV=2 - [E2RB31_CANLF]                         | 3,01  | 1 | 1 | 1 | 1 |
| F1PBF3     | Mitogen-activated protein kinase-activated protein kinase 5 OS=Canis lupus familiaris GN=MAPKAPK5 PE=4 SV    | 2,96  | 1 | 1 | 1 | 1 |
| E2QWC9     | Methylcrotonoyl-CoA carboxylase 2 OS=Canis lupus familiaris GN=MCCC2 PE=4 SV=2 - [E2QWC9_CANLF]              | 2,84  | 1 | 1 | 1 | 1 |
| Q30347     | Integral membrane glycoprotein (Fragment) OS=Canis lupus familiaris GN=LA-DRB PE=2 SV=1 - [Q30347_CANL       | 2,72  | 1 | 0 | 1 | 1 |
| Q30349     | Integral membrane glycoprotein (Fragment) OS=Canis lupus familiaris GN=LA-DRB PE=2 SV=1 - [Q30349_CANL       | 2,72  | 1 | 0 | 1 | 1 |
| Q30346     | Integral membrane glycoprotein (Fragment) OS=Canis lupus familiaris GN=Dw1 PE=2 SV=1 - [Q30346_CANLF]        | 2,72  | 1 | 0 | 1 | 1 |
| A0A140KFN7 | MHC class II antigen beta chain OS=Canis lupus familiaris GN=DLA-DRB1 PE=2 SV=1 - [A0A140KFN7_CANLF]         | 2,63  | 1 | 0 | 1 | 1 |
| Q5W424     | MHC class II DR beta 1 OS=Canis lupus familiaris GN=DLA-DRB1 PE=3 SV=1 - [Q5W424_CANLF]                      | 2,63  | 1 | 0 | 1 | 1 |
| E2R9K6     | Arginyl-tRNA synthetase 2, mitochondrial OS=Canis lupus familiaris GN=RARS2 PE=3 SV=2 - [E2R9K6_CANLF]       | 2,6   | 1 | 1 | 1 | 1 |
| F1Q298     | Glucocorticoid receptor OS=Canis lupus familiaris GN=NR3C1 PE=2 SV=2 - [F1Q298_CANLF]                        | 2,56  | 1 | 1 | 1 | 1 |
| E2R9U9     | FERM, ARH/RhoGEF and pleckstrin domain protein 2 OS=Canis lupus familiaris GN=FARP2 PE=4 SV=2 - [E2R9U9      | 2,5   | 1 | 0 | 1 | 1 |
| E2RGA9     | ATP/GTP binding protein like 5 OS=Canis lupus familiaris GN=AGBL5 PE=4 SV=2 - [E2RGA9_CANLF]                 | 2,15  | 1 | 1 | 1 | 1 |
| J9P5Y5     | Immunoglobulin superfamily DCC subclass member 4 OS=Canis lupus familiaris GN=IGDCC4 PE=4 SV=1 - [J9P5Y      | 2,13  | 1 | 0 | 1 | 1 |
| J9P669     | Cadherin 5 OS=Canis lupus familiaris GN=CDH5 PE=4 SV=1 - [J9P669_CANLF]                                      | 2,07  | 1 | 0 | 1 | 1 |
| E2RE03     | Cadherin 5 OS=Canis lupus familiaris GN=CDH5 PE=4 SV=2 - [E2RE03_CANLF]                                      | 2,02  | 1 | 0 | 1 | 1 |
| J9P330     | Caspase recruitment domain family member 6 OS=Canis lupus familiaris GN=CARD6 PE=4 SV=1 - [J9P330_CANI       | 1,96  | 1 | 0 | 1 | 1 |
| A0A0E3ZQT4 | Uncharacterized protein OS=Pasteurella multocida subsp. multocida OH4807 GN=I926_08625 PE=4 SV=1 - [A0/      | 1,69  | 1 | 1 | 1 | 1 |
| F1PQB8     | Immunoglobulin superfamily DCC subclass member 4 OS=Canis lupus familiaris GN=IGDCC4 PE=4 SV=2 - [F1PQ       | 1,69  | 1 | 0 | 1 | 1 |
| F1PDX5     | Uncharacterized protein OS=Canis lupus familiaris GN=KIF4A PE=3 SV=2 - [F1PDX5_CANLF]                        | 1,62  | 1 | 1 | 1 | 1 |
| F1PZI1     | Caspase recruitment domain family member 6 OS=Canis lupus familiaris GN=CARD6 PE=4 SV=2 - [F1PZI1_CANL       | 1,45  | 1 | 0 | 1 | 1 |
| F1PBE7     | Guanylate cyclase OS=Canis lupus familiaris GN=GUCY2D PE=3 SV=1 - [F1PBE7_CANLF]                             | 1,43  | 1 | 0 | 1 | 1 |
| F1PHK9     | Laminin subunit gamma 1 OS=Canis lupus familiaris GN=LAMC1 PE=4 SV=2 - [F1PHK9_CANLF]                        | 1,41  | 1 | 1 | 1 | 1 |
| E2QX66     | Caspase recruitment domain family member 6 OS=Canis lupus familiaris GN=CARD6 PE=4 SV=2 - [E2QX66_CAN        | 1,39  | 1 | 0 | 1 | 1 |
| O19179     | Retinal guanylyl cyclase 1 OS=Canis lupus familiaris GN=GUCY2D PE=2 SV=1 - [GUC2D_CANLF]                     | 1,35  | 1 | 0 | 1 | 1 |
| J9NXS8     | Zinc finger MYM-type containing 4 OS=Canis lupus familiaris GN=ZMYM4 PE=4 SV=1 - [J9NXS8_CANLF]              | 1,32  | 1 | 0 | 1 | 1 |
| E2RKG5     | SR-related CTD associated factor 11 OS=Canis lupus familiaris GN=SCAF11 PE=4 SV=1 - [E2RKG5_CANLF]           | 1,3   | 1 | 1 | 1 | 1 |
| E2R4F8     | NADH:ubiquinone oxidoreductase core subunit S1 OS=Canis lupus familiaris GN=NDUFS1 PE=3 SV=1 - [E2R4F8_      | 1,24  | 1 | 0 | 1 | 1 |
| E2RD75     | NADH:ubiquinone oxidoreductase core subunit S1 OS=Canis lupus familiaris GN=NDUFS1 PE=3 SV=1 - [E2RD75_      | 1,22  | 1 | 0 | 1 | 1 |
| J9NTW1     | Uncharacterized protein OS=Canis lupus familiaris GN=GON4L PE=4 SV=1 - [J9NTW1_CANLF]                        | 1,21  | 1 | 0 | 1 | 1 |
| E2RQX5     | Myosin IIIA OS=Canis lupus familiaris GN=MYO3A PE=4 SV=2 - [E2RQX5_CANLF]                                    | 1,18  | 1 | 1 | 1 | 1 |
| F1PLF6     | Proto-oncogene tyrosine-protein kinase receptor Ret OS=Canis lupus familiaris GN=RET PE=3 SV=2 - [F1PLF6_C   | 1,17  | 1 | 0 | 1 | 1 |
| F1P7J3     | Zinc finger MYM-type containing 4 OS=Canis lupus familiaris GN=ZMYM4 PE=4 SV=2 - [F1P7J3_CANLF]              | 1,12  | 1 | 0 | 1 | 1 |
| F1PQC8     | Cardiomyopathy associated 5 OS=Canis lupus familiaris GN=CMYA5 PE=4 SV=2 - [F1PQC8_CANLF]                    | 0,56  | 1 | 1 | 1 | 1 |
| A8C750     | Thyroid adenoma-associated protein homolog OS=Canis lupus familiaris GN=THADA PE=2 SV=1 - [THADA_CANI        | 0,46  | 1 | 1 | 1 | 1 |
| F1PHP9     | Ectopic P-granules autophagy protein 5 homolog OS=Canis lupus familiaris GN=EPG5 PE=4 SV=2 - [F1PHP9_CAI     | 0,39  | 1 | 1 | 1 | 1 |
| F1PHH5     | Mucin 5B, oligomeric mucus/gel-forming OS=Canis lupus familiaris GN=MUC5B PE=4 SV=2 - [F1PHH5_CANLF]         | 0,36  | 1 | 0 | 1 | 2 |
| J9JHJ8     | Mucin 5B, oligomeric mucus/gel-forming OS=Canis lupus familiaris GN=MUC5B PE=4 SV=1 - [J9JHJ8_CANLF]         | 0,35  | 1 | 0 | 1 | 2 |
| E2RT89     | Uncharacterized protein OS=Canis lupus familiaris GN=GON4L PE=4 SV=2 - [E2RT89_CANLF]                        | 0,31  | 1 | 0 | 1 | 1 |
| E2RF56     | Sacsin molecular chaperone OS=Canis lupus familiaris GN=SACS PE=4 SV=2 - [E2RF56_CANLF]                      | 0,22  | 1 | 1 | 1 | 1 |
| Q91NH3     | Antigenic glycoprotein (Fragment) OS=Mokola virus PE=4 SV=1 - [Q91NH3_MOKV]                                  | 13,08 | 1 | 0 | 1 | 1 |
| E2RLM9     | Fibroblast growth factor binding protein 1 OS=Canis lupus familiaris GN=FGFBP1 PE=4 SV=2 - [E2RLM9_CANLF]    | 7,45  | 1 | 1 | 1 | 1 |
| E2QS67     | Glycine receptor beta OS=Canis lupus familiaris GN=GLRB PE=3 SV=1 - [E2QS67_CANLF]                           | 5,23  | 1 | 1 | 1 | 1 |
| F1Q0B8     | Uncharacterized protein OS=Canis lupus familiaris GN=KLK1 PE=3 SV=2 - [F1Q0B8_CANLF]                         | 5,12  | 1 | 1 | 1 | 1 |
| E5E503     | Glycoprotein (Fragment) OS=Mokola virus GN=G PE=2 SV=1 - [E5E503_MOKV]                                       | 3,87  | 1 | 0 | 1 | 1 |
| F1PD97     | Solute carrier family 25 member 44 OS=Canis lupus familiaris GN=SLC25A44 PE=3 SV=2 - [F1PD97_CANLF]          | 3,51  | 1 | 1 | 1 | 2 |
| E2QYQ8     | Zinc finger C2HC-type containing 1C OS=Canis lupus familiaris GN=ZC2HC1C PE=4 SV=1 - [E2QYQ8_CANLF]          | 3,4   | 1 | 1 | 1 | 2 |
| P0C572     | Glycoprotein OS=Mokola virus GN=G PE=1 SV=1 - [GLYCO_MOKV]                                                   | 3,26  | 1 | 0 | 1 | 1 |
| A0A1L2C213 | Glycoprotein OS=Mokola virus GN=G PE=4 SV=1 - [A0A1L2C213_MOKV]                                              | 3,26  | 1 | 0 | 1 | 1 |
| R9Q7B6     | Glycoprotein OS=Mokola virus PE=4 SV=1 - [R9Q7B6_MOKV]                                                       | 3,26  | 1 | 0 | 1 | 1 |
| R9Q9C4     | Glycoprotein OS=Mokola virus GN=G PE=4 SV=1 - [R9Q9C4_MOKV]                                                  | 3,26  | 1 | 0 | 1 | 1 |
| S5DTA7     | Glycoprotein OS=Mokola virus GN=G PE=4 SV=1 - [S5DTA7_MOKV]                                                  | 3,26  | 1 | 0 | 1 | 1 |
| S4S2B6     | Glycoprotein OS=Mokola virus GN=G PE=4 SV=1 - [S4S2B6_MOKV]                                                  | 3,26  | 1 | 0 | 1 | 1 |
| Q83543     | Glycoprotein OS=Mokola virus GN=G PE=4 SV=1 - [Q83543_MOKV]                                                  | 3,26  | 1 | 0 | 1 | 1 |
| F2VIE2     | Glycoprotein OS=Mokola virus PE=4 SV=1 - [F2VIE2_MOKV]                                                       | 3,26  | 1 | 0 | 1 | 1 |
| R9Q7P2     | Glycoprotein OS=Mokola virus GN=G PE=4 SV=1 - [R9Q7P2_MOKV]                                                  | 3,26  | 1 | 0 | 1 | 1 |
| S5DTB2     | Glycoprotein OS=Mokola virus GN=G PE=4 SV=1 - [S5DTB2_MOKV]                                                  | 3,26  | 1 | 0 | 1 | 1 |
| S5DTB7     | Glycoprotein OS=Mokola virus GN=G PE=4 SV=1 - [S5DTB7_MOKV]                                                  | 3,26  | 1 | 0 | 1 | 1 |
| B2XXZ2     | Glycoprotein OS=Mokola virus GN=G PE=4 SV=1 - [B2XXZ2_MOKV]                                                  | 3,26  | 1 | 0 | 1 | 1 |
| A0A1L2C207 | Glycoprotein OS=Mokola virus GN=G PE=4 SV=1 - [A0A1L2C207_MOKV]                                              | 3,26  | 1 | 0 | 1 | 1 |
| B2XXZ7     | Glycoprotein OS=Mokola virus GN=G PE=4 SV=1 - [B2XXZ7_MOKV]                                                  | 3,26  | 1 | 0 | 1 | 1 |
| S4S290     | Glycoprotein OS=Mokola virus GN=G PE=4 SV=1 - [S4S290_MOKV]                                                  | 3,26  | 1 | 0 | 1 | 1 |
| J9NRP8     | Twinfilin actin binding protein 1 OS=Canis lupus familiaris GN=TWF1 PE=4 SV=1 - [J9NRP8_CANLF]               | 3,14  | 1 | 0 | 1 | 1 |
| F1PFK0     | Twinfilin actin binding protein 1 OS=Canis lupus familiaris GN=TWF1 PE=4 SV=2 - [F1PFK0_CANLF]               | 3,08  | 1 | 0 | 1 | 1 |
| E2RCT9     | DNA polymerase epsilon subunit OS=Canis lupus familiaris GN=DNAAF2 PE=3 SV=2 - [E2RCT9_CANLF]                | 3,04  | 1 | 0 | 1 | 1 |
| J9PBE8     | DNA polymerase epsilon subunit OS=Canis lupus familiaris GN=DNAAF2 PE=3 SV=1 - [J9PBE8_CANLF]                | 2,93  | 1 | 0 | 1 | 1 |
| A0A0E3ZRL4 | Uncharacterized protein OS=Pasteurella multocida subsp. multocida OH4807 GN=I926_05385 PE=4 SV=1 - [A0/      | 2,87  | 1 | 1 | 1 | 2 |
| F1P9V1     | Frizzled-6 OS=Canis lupus familiaris GN=FZD6 PE=3 SV=1 - [F1P9V1_CANLF]                                      | 2,39  | 1 | 1 | 1 | 1 |
| E2RR69     | Deoxy nucleotidyltransferase terminal interacting protein 2 OS=Canis lupus familiaris GN=DNTTIP2 PE=4 SV=2 - | 2,39  | 1 | 1 | 1 | 1 |
| F1PX27     | FCH and double SH3 domains 1 OS=Canis lupus familiaris GN=FCHSD1 PE=4 SV=2 - [F1PX27_CANLF]                  | 1,88  | 1 | 1 | 1 | 1 |
| F6XTC9     | CTD small phosphatase like 2 OS=Canis lupus familiaris GN=CTDSP2 PE=4 SV=1 - [F6XTC9_CANLF]                  | 1,5   | 1 | 1 | 1 | 1 |
| E2RGV7     | Cation-transporting ATPase OS=Canis lupus familiaris GN=ATP13A3 PE=3 SV=2 - [E2RGV7_CANLF]                   | 1,47  | 1 | 0 | 1 | 1 |
| F1PMU4     | Neural cell adhesion molecule 1 OS=Canis lupus familiaris GN=NCAM1 PE=4 SV=2 - [F1PMU4_CANLF]                | 1,45  | 1 | 1 | 1 | 1 |
| J9P4P2     | Cation-transporting ATPase OS=Canis lupus familiaris GN=ATP13A3 PE=3 SV=1 - [J9P4P2_CANLF]                   | 1,43  | 1 | 0 | 1 | 1 |
| F1PER6     | Membrane bound transcription factor peptidase, site 1 OS=Canis lupus familiaris GN=MBTPS1 PE=4 SV=2 - [F1f   | 1,33  | 1 | 1 | 1 | 1 |
| E2RJ59     | Serine/threonine-protein phosphatase OS=Canis lupus familiaris GN=PPP3CB PE=3 SV=2 - [E2RJ59_CANLF]          | 1,15  | 1 | 0 | 1 | 1 |
| E2RCS3     | Uncharacterized protein OS=Canis lupus familiaris GN=LOC489979 PE=4 SV=2 - [E2RCS3_CANLF]                    | 0,36  | 1 | 0 | 1 | 1 |
| E2R030     | Gremlin OS=Canis lupus familiaris GN=GREM1 PE=3 SV=1 - [E2R030_CANLF]                                        | 15,76 | 1 | 1 | 1 | 1 |
| A0A0E3V305 | DNA-directed RNA polymerase subunit omega OS=Pasteurella multocida subsp. multocida OH4807 GN=rpoZ PI        | 14,61 | 1 | 1 | 1 | 1 |
| E2QTV8     | Uncharacterized protein OS=Canis lupus familiaris PE=3 SV=2 - [E2QTV8_CANLF]                                 | 14,56 | 1 | 1 | 1 | 1 |
| F1Q2K0     | Uncharacterized protein OS=Canis lupus familiaris PE=4 SV=2 - [F1Q2K0_CANLF]                                 | 11,4  | 1 | 1 | 1 | 1 |
| A0A0E3V3T5 | ADP-ribosyl pyrophosphatase NudF OS=Pasteurella multocida subsp. multocida OH4807 GN=nudF PE=4 SV=1 -        | 10,34 | 1 | 1 | 1 | 1 |
| J9P611     | Olfactory receptor OS=Canis lupus familiaris GN=LOC484983 PE=3 SV=1 - [J9P611_CANLF]                         | 7,72  | 1 | 1 | 1 | 2 |
| A0A0E3ZRI0 | Ribose import ATP-binding protein RbsA OS=Pasteurella multocida subsp. multocida OH4807 GN=rbsA PE=3 SV      | 5,17  | 1 | 1 | 1 | 1 |
| E2RMX4     | Cryptochrome circadian clock 1 OS=Canis lupus familiaris GN=CRY1 PE=4 SV=2 - [E2RMX4_CANLF]                  | 4,94  | 1 | 1 | 1 | 1 |

|            |                                                                                                                                              |       |   |   |   |   |
|------------|----------------------------------------------------------------------------------------------------------------------------------------------|-------|---|---|---|---|
| J9NVZ9     | Transcription factor AP-2 alpha OS=Canis lupus familiaris GN=TFAP2A PE=4 SV=1 - [J9NVZ9_CANLF]                                               | 4,41  | 1 | 0 | 1 | 1 |
| A0A0E3V3N2 | tRNA(Ile)-lysidine synthase OS=Pasteurella multocida subsp. multocida OH4807 GN=tIS PE=3 SV=1 - [A0A0E3V3N2]                                 | 4,37  | 1 | 1 | 1 | 1 |
| F1PFJ9     | Transcription factor AP-2 alpha OS=Canis lupus familiaris GN=TFAP2A PE=4 SV=2 - [F1PFJ9_CANLF]                                               | 4,33  | 1 | 0 | 1 | 1 |
| J9P605     | Mitogen-activated protein kinase kinase kinase 20 OS=Canis lupus familiaris GN=MAP3K20 PE=4 SV=1 - [J9P605]                                  | 3,52  | 1 | 0 | 1 | 1 |
| F1PIB8     | RAB44, member RAS oncogene family OS=Canis lupus familiaris GN=RAB44 PE=4 SV=1 - [F1PIB8_CANLF]                                              | 3,38  | 1 | 1 | 1 | 1 |
| F1PMK8     | NADH:ubiquinone oxidoreductase complex assembly factor 6 OS=Canis lupus familiaris GN=NDUFAF6 PE=4 SV=1 - [F1PMK8]                           | 3,29  | 1 | 1 | 1 | 2 |
| E2R7W8     | Family with sequence similarity 193 member B OS=Canis lupus familiaris GN=FAM193B PE=4 SV=2 - [E2R7W8_1]                                     | 2,93  | 1 | 0 | 1 | 1 |
| E2RDJ9     | Testin OS=Canis lupus familiaris GN=TES PE=4 SV=1 - [E2RDJ9_CANLF]                                                                           | 2,91  | 1 | 0 | 1 | 1 |
| A0M8U6     | Testin OS=Canis lupus familiaris GN=TES PE=3 SV=1 - [TES_CANLF]                                                                              | 2,85  | 1 | 0 | 1 | 1 |
| F1PFX9     | Testin OS=Canis lupus familiaris GN=TES PE=4 SV=1 - [F1PFX9_CANLF]                                                                           | 2,85  | 1 | 0 | 1 | 1 |
| E2R9U0     | Synaptotagmin like 4 OS=Canis lupus familiaris GN=SYTL4 PE=4 SV=2 - [E2R9U0_CANLF]                                                           | 2,83  | 1 | 1 | 1 | 1 |
| J9NZW2     | Uncharacterized protein OS=Canis lupus familiaris GN=MICALL2 PE=4 SV=1 - [J9NZW2_CANLF]                                                      | 2,8   | 1 | 0 | 1 | 1 |
| F6XRD6     | Sosondawah ankyrin repeat domain family member C OS=Canis lupus familiaris GN=SOWAHC PE=4 SV=1 - [F6XRD6]                                    | 2,79  | 1 | 0 | 1 | 1 |
| F1PM58     | Family with sequence similarity 193 member B OS=Canis lupus familiaris GN=FAM193B PE=4 SV=2 - [F1PM58_1]                                     | 2,56  | 1 | 0 | 1 | 1 |
| J9P7M6     | tRNA (guanine(37)-N1)-methyltransferase OS=Canis lupus familiaris GN=TRMT5 PE=3 SV=1 - [J9P7M6_CANLF]                                        | 2,42  | 1 | 0 | 1 | 1 |
| J9P199     | tRNA (guanine(37)-N1)-methyltransferase OS=Canis lupus familiaris GN=TRMT5 PE=3 SV=1 - [J9P199_CANLF]                                        | 2,41  | 1 | 0 | 1 | 1 |
| F1PN08     | tRNA (guanine(37)-N1)-methyltransferase OS=Canis lupus familiaris GN=TRMT5 PE=3 SV=2 - [F1PN08_CANLF]                                        | 2,39  | 1 | 0 | 1 | 1 |
| F1PGZ7     | Phospholipase A2 OS=Canis lupus familiaris GN=PLA2G4E PE=4 SV=1 - [F1PGZ7_CANLF]                                                             | 2,36  | 1 | 1 | 1 | 1 |
| E2RSL5     | SUMO1 activating enzyme subunit 1 OS=Canis lupus familiaris GN=SAE1 PE=4 SV=2 - [E2RSL5_CANLF]                                               | 2,31  | 1 | 1 | 1 | 3 |
| F1PHR8     | Uncharacterized protein OS=Canis lupus familiaris GN=MICALL2 PE=4 SV=2 - [F1PHR8_CANLF]                                                      | 2,31  | 1 | 0 | 1 | 1 |
| E2REE9     | Mitogen-activated protein kinase kinase kinase 20 OS=Canis lupus familiaris GN=MAP3K20 PE=4 SV=2 - [E2REE9]                                  | 2     | 1 | 0 | 1 | 1 |
| E2RR39     | Kinesin-like protein OS=Canis lupus familiaris GN=KIF3C PE=3 SV=1 - [E2RR39_CANLF]                                                           | 1,76  | 1 | 0 | 1 | 1 |
| E2RJ94     | PTGES3L-AARSD1 readthrough OS=Canis lupus familiaris GN=PTGES3L-AARSD1 PE=4 SV=2 - [E2RJ94_CANLF]                                            | 1,71  | 1 | 0 | 1 | 1 |
| E2QY99     | Membrane palmitoylated protein 5 OS=Canis lupus familiaris GN=MPP5 PE=3 SV=1 - [E2QY99_CANLF]                                                | 1,63  | 1 | 1 | 1 | 1 |
| F1PLB0     | SATB homeobox 1 OS=Canis lupus familiaris GN=SATB1 PE=4 SV=2 - [F1PLB0_CANLF]                                                                | 1,58  | 1 | 0 | 1 | 1 |
| E2RME8     | BCL6 corepressor OS=Canis lupus familiaris GN=BCOR PE=4 SV=2 - [E2RME8_CANLF]                                                                | 1,52  | 1 | 0 | 1 | 1 |
| A0A0E3ZSN6 | Site-specific recombinase OS=Pasteurella multocida subsp. multocida OH4807 GN=I926_08865 PE=4 SV=1 - [A0A0E3ZSN6]                            | 1,52  | 1 | 0 | 1 | 1 |
| J9NRQ8     | DNA-binding protein SATB OS=Canis lupus familiaris GN=SATB2 PE=3 SV=1 - [J9NRQ8_CANLF]                                                       | 1,5   | 1 | 0 | 1 | 1 |
| E2RME7     | BCL6 corepressor OS=Canis lupus familiaris GN=BCOR PE=4 SV=2 - [E2RME7_CANLF]                                                                | 1,48  | 1 | 0 | 1 | 1 |
| F1Q2V6     | DNA-binding protein SATB OS=Canis lupus familiaris GN=SATB2 PE=3 SV=2 - [F1Q2V6_CANLF]                                                       | 1,44  | 1 | 0 | 1 | 1 |
| F1PIS1     | Stromal interaction molecule 1 OS=Canis lupus familiaris GN=STIM1 PE=4 SV=2 - [F1PIS1_CANLF]                                                 | 1,31  | 1 | 1 | 1 | 1 |
| J9NZQ6     | Family with sequence similarity 186 member A OS=Canis lupus familiaris GN=FAM186A PE=4 SV=1 - [J9NZQ6_C]                                     | 1,2   | 1 | 0 | 1 | 1 |
| E2R7Z7     | PHD finger protein 3 OS=Canis lupus familiaris GN=PHF3 PE=4 SV=1 - [E2R7Z7_CANLF]                                                            | 1,17  | 1 | 1 | 1 | 1 |
| E2QXT4     | DExH-box helicase 58 OS=Canis lupus familiaris GN=DHX58 PE=4 SV=2 - [E2QXT4_CANLF]                                                           | 1,03  | 1 | 0 | 1 | 1 |
| J9JHC0     | Family with sequence similarity 186 member A OS=Canis lupus familiaris GN=FAM186A PE=4 SV=1 - [J9JHC0_C]                                     | 0,99  | 1 | 0 | 1 | 1 |
| F1PRA7     | DNA topoisomerase 2 OS=Canis lupus familiaris GN=TOP2B PE=3 SV=2 - [F1PRA7_CANLF]                                                            | 0,87  | 1 | 1 | 1 | 1 |
| F1PI29     | Pecanex homolog 1 OS=Canis lupus familiaris GN=PCNX1 PE=4 SV=2 - [F1PI29_CANLF]                                                              | 0,87  | 1 | 1 | 1 | 1 |
| E2QSX9     | Laminin subunit beta 4 OS=Canis lupus familiaris GN=LAMB4 PE=4 SV=1 - [E2QSX9_CANLF]                                                         | 0,69  | 1 | 1 | 1 | 1 |
| F6XNI2     | Phosphodiesterase 4D interacting protein OS=Canis lupus familiaris GN=PDE4DIP PE=4 SV=1 - [F6XNI2_CANLF]                                     | 0,58  | 1 | 0 | 1 | 1 |
| J9NW79     | Phosphodiesterase 4D interacting protein OS=Canis lupus familiaris GN=PDE4DIP PE=4 SV=1 - [J9NW79_CANLF]                                     | 0,53  | 1 | 0 | 1 | 1 |
| J9P2H2     | ATR serine/threonine kinase OS=Canis lupus familiaris GN=ATR PE=3 SV=1 - [J9P2H2_CANLF]                                                      | 0,27  | 1 | 0 | 1 | 1 |
| E2QXA4     | ATR serine/threonine kinase OS=Canis lupus familiaris GN=ATR PE=3 SV=2 - [E2QXA4_CANLF]                                                      | 0,26  | 1 | 0 | 1 | 1 |
| Q2B279     | cGMP-gated cation channel alpha-1 OS=Canis lupus familiaris GN=CNGA1 PE=2 SV=1 - [CNGA1_CANLF]                                               | 4,49  | 1 | 0 | 1 | 1 |
| Q2PQH8     | Glycogen debranching enzyme OS=Canis lupus familiaris GN=AGL PE=2 SV=1 - [GDE_CANLF]                                                         | 1,63  | 1 | 0 | 1 | 2 |
| E2R8G0     | SNF2 histone linker PHD RING helicase OS=Canis lupus familiaris GN=SHPRH PE=4 SV=2 - [E2R8G0_CANLF]                                          | 0,36  | 1 | 1 | 1 | 1 |
| F1PBL3     | Glycogen debranching enzyme OS=Canis lupus familiaris GN=AGL PE=4 SV=2 - [F1PBL3_CANLF]                                                      | 1,63  | 1 | 0 | 1 | 2 |
| F1Q3U8     | cGMP-gated cation channel alpha-1 OS=Canis lupus familiaris GN=CNGA1 PE=4 SV=2 - [F1Q3U8_CANLF]                                              | 4,68  | 1 | 0 | 1 | 1 |
| E2RB00     | STIL, centriolar assembly protein OS=Canis lupus familiaris GN=STIL PE=4 SV=2 - [E2RB00_CANLF]                                               | 0,55  | 1 | 1 | 1 | 1 |
| J9P2P3     | Uncharacterized protein OS=Canis lupus familiaris PE=4 SV=1 - [J9P2P3_CANLF]                                                                 | 2,3   | 1 | 0 | 1 | 1 |
| E2R8G2     | ADAM metalloproteinase with thrombospondin type 1 motif 2 OS=Canis lupus familiaris GN=ADAMTS2 PE=4 SV=1 - [E2R8G2]                          | 0,83  | 1 | 1 | 1 | 1 |
| E2RIH2     | Calcium binding protein 39 like OS=Canis lupus familiaris GN=CAB39L PE=4 SV=2 - [E2RIH2_CANLF]                                               | 1,78  | 1 | 0 | 1 | 1 |
| F6X6W7     | Uncharacterized protein OS=Canis lupus familiaris GN=LMOD1 PE=4 SV=1 - [F6X6W7_CANLF]                                                        | 7,87  | 1 | 1 | 1 | 1 |
| F1P6U3     | Uncharacterized protein OS=Canis lupus familiaris GN=LOC102153511 PE=4 SV=2 - [F1P6U3_CANLF]                                                 | 2,03  | 1 | 1 | 1 | 1 |
| F1PZT6     | Kinesin-like protein OS=Canis lupus familiaris GN=KIFC3 PE=3 SV=2 - [F1PZT6_CANLF]                                                           | 2,79  | 1 | 0 | 1 | 1 |
| F6UN94     | Kinesin-like protein OS=Canis lupus familiaris GN=KIFC3 PE=3 SV=1 - [F6UN94_CANLF]                                                           | 3,09  | 1 | 0 | 1 | 1 |
| E2QXM3     | Uncharacterized protein OS=Canis lupus familiaris PE=4 SV=2 - [E2QXM3_CANLF]                                                                 | 4,12  | 1 | 0 | 1 | 1 |
| E2RA01     | Zinc finger protein 644 OS=Canis lupus familiaris GN=ZNF644 PE=4 SV=2 - [E2RA01_CANLF]                                                       | 1,28  | 1 | 1 | 1 | 1 |
| F1PLH1     | Interleukin 12 receptor subunit beta 2 OS=Canis lupus familiaris GN=IL12RB2 PE=4 SV=2 - [F1PLH1_CANLF]                                       | 0,93  | 1 | 1 | 1 | 1 |
| F1PNV3     | Dedicator of cytokinesis 9 OS=Canis lupus familiaris GN=DOC9 PE=3 SV=2 - [F1PNV3_CANLF]                                                      | 0,97  | 1 | 1 | 1 | 1 |
| H9GWQ7     | Uncharacterized protein OS=Canis lupus familiaris GN=LOC102153516 PE=4 SV=2 - [H9GWQ7_CANLF]                                                 | 4,52  | 1 | 0 | 1 | 1 |
| L7N0G0     | Uncharacterized protein OS=Canis lupus familiaris GN=LOC102153516 PE=4 SV=1 - [L7N0G0_CANLF]                                                 | 4,21  | 1 | 0 | 1 | 1 |
| L7N0J3     | Uncharacterized protein OS=Canis lupus familiaris PE=4 SV=1 - [L7N0J3_CANLF]                                                                 | 2,19  | 1 | 0 | 1 | 1 |
| L7N0M1     | Uncharacterized protein OS=Canis lupus familiaris PE=4 SV=1 - [L7N0M1_CANLF]                                                                 | 1,76  | 1 | 0 | 1 | 1 |
| Q4QYC8     | Interleukin 12 receptor beta-2 OS=Canis lupus familiaris PE=2 SV=1 - [Q4QYC8_CANLF]                                                          | 0,93  | 1 | 0 | 1 | 1 |
| F1Q2S9     | Synaptophysin like 2 OS=Canis lupus familiaris GN=SYPL2 PE=4 SV=1 - [F1Q2S9_CANLF]                                                           | 9,96  | 1 | 1 | 1 | 1 |
| J9NZT4     | N(alpha)-acetyltransferase 15, NatA auxiliary subunit OS=Canis lupus familiaris GN=NAA15 PE=4 SV=1 - [J9NZT4]                                | 2,21  | 1 | 0 | 1 | 1 |
| F1PUH1     | WD repeat domain 11 OS=Canis lupus familiaris GN=WDR11 PE=4 SV=2 - [F1PUH1_CANLF]                                                            | 1,55  | 1 | 1 | 1 | 1 |
| F1Q156     | Uncharacterized protein OS=Canis lupus familiaris GN=CETN2 PE=4 SV=2 - [F1Q156_CANLF]                                                        | 9,8   | 1 | 1 | 1 | 1 |
| F1P7D2     | Syntaxin binding protein 1 OS=Canis lupus familiaris GN=STXBP1 PE=3 SV=2 - [F1P7D2_CANLF]                                                    | 3,21  | 1 | 0 | 1 | 1 |
| J9NUA1     | Syntaxin binding protein 1 OS=Canis lupus familiaris GN=STXBP1 PE=3 SV=1 - [J9NUA1_CANLF]                                                    | 3,47  | 1 | 0 | 1 | 1 |
| J9NTI1     | Syntaxin binding protein 1 OS=Canis lupus familiaris GN=STXBP1 PE=3 SV=1 - [J9NTI1_CANLF]                                                    | 3,28  | 1 | 0 | 1 | 1 |
| J9P0P4     | MGAT4 family member D OS=Canis lupus familiaris GN=MGAT4D PE=4 SV=1 - [J9P0P4_CANLF]                                                         | 2,13  | 1 | 0 | 1 | 1 |
| J9P431     | MGAT4 family member D OS=Canis lupus familiaris GN=MGAT4D PE=4 SV=1 - [J9P431_CANLF]                                                         | 2,03  | 1 | 0 | 1 | 1 |
| Q9B637     | Outer capsid protein VP4 OS=Rotavirus A (isolate RVA/Dog/United States/Cu-1/1982/G3P5A[3]) PE=2 SV=1 - [V]                                   | 1,68  | 1 | 0 | 1 | 1 |
| Q06894     | Outer capsid protein VP4 OS=Rotavirus A (isolate RVA/Dog/United States/K9/1981/G3P5A[3]) PE=2 SV=1 - [VP4]                                   | 1,68  | 1 | 0 | 1 | 1 |
| B6SAL0     | Outer capsid protein VP4 OS=Rotavirus A (isolate RVA/Dog/United States/K9/1981/G3P5A[3]) GN=VP4 PE=3 SV=1 - [B6SAL0]                         | 1,68  | 1 | 0 | 1 | 1 |
| B6SAI9     | Outer capsid protein VP4 OS=Rotavirus A (isolate RVA/Dog/United States/Cu-1/1982/G3P5A[3]) GN=VP4 PE=3 SV=1 - [B6SAI9]                       | 1,68  | 1 | 0 | 1 | 1 |
| F1Q4F5     | Adenylosuccinate synthetase isozyme 2 OS=Canis lupus familiaris GN=ADSS PE=3 SV=2 - [F1Q4F5_CANLF]                                           | 3,95  | 1 | 1 | 1 | 1 |
| E2RDH6     | Dynein cytoplasmic 2 heavy chain 1 OS=Canis lupus familiaris GN=DYNC2H1 PE=4 SV=2 - [E2RDH6_CANLF]                                           | 0,44  | 1 | 1 | 1 | 1 |
| J9P9G3     | LY6/PLAUR domain containing 8 OS=Canis lupus familiaris GN=LYPD8 PE=4 SV=1 - [J9P9G3_CANLF]                                                  | 14,53 | 1 | 1 | 1 | 2 |
| E2RAC1     | Zinc finger HIT-type containing 6 OS=Canis lupus familiaris GN=ZNHIT6 PE=4 SV=2 - [E2RAC1_CANLF]                                             | 6,41  | 1 | 1 | 1 | 1 |
| A0A0E3ZPV7 | Fumarate/nitrate reduction transcriptional regulator OS=Pasteurella multocida subsp. multocida OH4807 GN=I926_08865 PE=4 SV=1 - [A0A0E3ZPV7] | 7,14  | 1 | 1 | 1 | 1 |
| F1PRK7     | ATP synthase mitochondrial F1 complex assembly factor 2 OS=Canis lupus familiaris GN=ATPAF2 PE=4 SV=2 - [F1PRK7]                             | 8,07  | 1 | 0 | 1 | 1 |
| J9P3Y1     | ATP synthase mitochondrial F1 complex assembly factor 2 OS=Canis lupus familiaris GN=ATPAF2 PE=4 SV=1 - [J9P3Y1]                             | 9,43  | 1 | 0 | 1 | 1 |
| E2RAV2     | Carbamoyl-phosphate synthetase 2, aspartate transcarbamylase, and dihydroorotase OS=Canis lupus familiaris GN=PCFB PE=4 SV=1 - [E2RAV2]      | 0,4   | 1 | 0 | 1 | 1 |
| J9P266     | Carbamoyl-phosphate synthetase 2, aspartate transcarbamylase, and dihydroorotase OS=Canis lupus familiaris GN=PCFB PE=4 SV=1 - [J9P266]      | 0,42  | 1 | 0 | 1 | 1 |
| E2QXK2     | TBC1 domain containing kinase OS=Canis lupus familiaris GN=TBCCK PE=4 SV=2 - [E2QXK2_CANLF]                                                  | 0,9   | 1 | 1 | 1 | 1 |
| E2R1R4     | Uncharacterized protein OS=Canis lupus familiaris GN=ATP6V1E1 PE=3 SV=1 - [E2R1R4_CANLF]                                                     | 11,5  | 1 | 0 | 1 | 1 |
| J9NUC4     | Uncharacterized protein OS=Canis lupus familiaris PE=4 SV=1 - [J9NUC4_CANLF]                                                                 | 15,85 | 1 | 0 | 1 | 1 |
| Q6JDG6     | Spleen tyrosine kinase (Fragment) OS=Canis lupus familiaris GN=SYK PE=4 SV=1 - [Q6JDG6_CANLF]                                                | 60    | 1 | 0 | 1 | 1 |
| A0A097ZQL4 | Periostin (Fragment) OS=Canis lupus familiaris GN=POSTN PE=2 SV=1 - [A0A097ZQL4_CANLF]                                                       | 17,39 | 1 | 0 | 1 | 2 |
| A0A0E3V4W0 | WecD protein OS=Pasteurella multocida subsp. multocida OH4807 GN=I926_07815 PE=4 SV=1 - [A0A0E3V4W0]                                         | 17,36 | 1 | 1 | 1 | 1 |
| A0A0E3ZP41 | Na(+)-translocating NADH-quinone reductase subunit E OS=Pasteurella multocida subsp. multocida OH4807 GN=I926_07815 PE=4 SV=1 - [A0A0E3ZP41] | 16,67 | 1 | 1 | 1 | 1 |

|            |                                                                                                             |       |   |   |   |   |
|------------|-------------------------------------------------------------------------------------------------------------|-------|---|---|---|---|
| E2RA93     | Uncharacterized protein OS=Canis lupus familiaris GN=MORN5 PE=4 SV=2 - [E2RA93_CANLF]                       | 15,53 | 1 | 0 | 1 | 1 |
| J9P563     | Uncharacterized protein OS=Canis lupus familiaris GN=LOC102151297 PE=4 SV=1 - [J9P563_CANLF]                | 14,64 | 1 | 1 | 1 | 2 |
| E2RG58     | Hematopoietic prostaglandin D synthase OS=Canis lupus familiaris GN=HPGDS PE=4 SV=1 - [E2RG58_CANLF]        | 13,47 | 1 | 0 | 1 | 1 |
| E5RQH2     | Hematopoietic PGD synthase OS=Canis lupus familiaris GN=H-PGDS PE=2 SV=1 - [E5RQH2_CANLF]                   | 13,07 | 1 | 0 | 1 | 1 |
| E2R9G8     | Hexosyltransferase OS=Canis lupus familiaris GN=B3GALT6 PE=3 SV=1 - [E2R9G8_CANLF]                          | 12,7  | 1 | 1 | 1 | 2 |
| D7PBH4     | Allergen Can f 4 OS=Canis lupus familiaris PE=2 SV=1 - [D7PBH4_CANLF]                                       | 12,64 | 1 | 1 | 1 | 1 |
| E2RMY0     | Transmembrane protein 33 OS=Canis lupus familiaris GN=TMEM33 PE=4 SV=1 - [E2RMY0_CANLF]                     | 12,55 | 1 | 0 | 1 | 2 |
| J9NXD3     | Transmembrane protein 35A OS=Canis lupus familiaris GN=TMEM35A PE=4 SV=1 - [J9NXD3_CANLF]                   | 12,21 | 1 | 1 | 1 | 1 |
| F1Q3N3     | Uncharacterized protein OS=Canis lupus familiaris PE=4 SV=2 - [F1Q3N3_CANLF]                                | 11,95 | 1 | 1 | 1 | 1 |
| A0A0E3V3V2 | tRNA-specific adenosine deaminase OS=Pasteurella multocida subsp. multocida OH4807 GN=tadA PE=3 SV=1 -      | 11,88 | 1 | 1 | 1 | 1 |
| E2QWK3     | Dehydrogenase/reductase 7 OS=Canis lupus familiaris GN=DHR57 PE=3 SV=1 - [E2QWK3_CANLF]                     | 11,5  | 1 | 1 | 1 | 1 |
| Q65954     | Pre-protein VI OS=Canine adenovirus serotype 1 (strain CLL) GN=L3 PE=3 SV=1 - [CAP6_ADECC]                  | 10,92 | 1 | 0 | 1 | 1 |
| Q96686     | Pre-protein VI OS=Canine adenovirus serotype 1 (strain RI261) GN=L3 PE=3 SV=1 - [CAP6_ADECR]                | 10,92 | 1 | 0 | 1 | 1 |
| F1PFG7     | Protein phosphatase 1 regulatory subunit 35 OS=Canis lupus familiaris GN=PPP1R35 PE=4 SV=1 - [F1PFG7_CAN]   | 10,82 | 1 | 1 | 1 | 1 |
| J9NZH5     | Olfactory receptor (Fragment) OS=Canis lupus familiaris GN=OR51V1 PE=3 SV=1 - [J9NZH5_CANLF]                | 10,73 | 1 | 1 | 1 | 1 |
| P87561     | Protein VI OS=Canine adenovirus serotype 2 PE=4 SV=1 - [P87561_ADECC2]                                      | 10,44 | 1 | 0 | 1 | 1 |
| E2QXR2     | Tetraspanin 13 OS=Canis lupus familiaris GN=TSPAN13 PE=3 SV=1 - [E2QXR2_CANLF]                              | 10,29 | 1 | 0 | 1 | 1 |
| J9NY90     | Uncharacterized protein OS=Canis lupus familiaris GN=MORN5 PE=4 SV=1 - [J9NY90_CANLF]                       | 9,92  | 1 | 0 | 1 | 1 |
| E2RM07     | RIC3 acetylcholine receptor chaperone OS=Canis lupus familiaris GN=RIC3 PE=4 SV=2 - [E2RM07_CANLF]          | 9,76  | 1 | 1 | 1 | 1 |
| E2RNC4     | Peroxisomal biogenesis factor 19 OS=Canis lupus familiaris GN=PEX19 PE=4 SV=1 - [E2RNC4_CANLF]              | 9,36  | 1 | 1 | 1 | 1 |
| E2QXX6     | Aquaporin 9 OS=Canis lupus familiaris GN=AQP9 PE=3 SV=1 - [E2QXX6_CANLF]                                    | 9,15  | 1 | 1 | 1 | 1 |
| F6X6A0     | C-type lectin domain containing 11A OS=Canis lupus familiaris GN=CLEC11A PE=4 SV=1 - [F6X6A0_CANLF]         | 8,36  | 1 | 1 | 1 | 1 |
| E2RBR6     | Proteasome subunit beta OS=Canis lupus familiaris GN=PSMB4 PE=3 SV=1 - [E2RBR6_CANLF]                       | 8,33  | 1 | 1 | 1 | 1 |
| F1PWV5     | Tetraspanin 13 OS=Canis lupus familiaris GN=TSPAN13 PE=3 SV=2 - [F1PWV5_CANLF]                              | 8,27  | 1 | 0 | 1 | 1 |
| E2R4J2     | Uncharacterized protein OS=Canis lupus familiaris GN=TMPO PE=4 SV=1 - [E2R4J2_CANLF]                        | 7,93  | 1 | 1 | 1 | 1 |
| F1PGW8     | Ankyrin repeat domain 9 OS=Canis lupus familiaris GN=ANKRD9 PE=4 SV=2 - [F1PGW8_CANLF]                      | 7,74  | 1 | 1 | 1 | 2 |
| E2RK90     | Transmembrane protein 177 OS=Canis lupus familiaris GN=TMEM177 PE=4 SV=1 - [E2RK90_CANLF]                   | 7,72  | 1 | 1 | 1 | 1 |
| J9NSK2     | Uncharacterized protein OS=Canis lupus familiaris PE=4 SV=1 - [J9NSK2_CANLF]                                | 7,69  | 1 | 1 | 1 | 1 |
| J9PAQ5     | Protein S100 OS=Canis lupus familiaris GN=S100A12 PE=3 SV=1 - [J9PAQ5_CANLF]                                | 7,61  | 1 | 0 | 1 | 1 |
| F1CL89     | Follicle-stimulating hormone receptor (Fragment) OS=Canis lupus familiaris GN=FSHR PE=3 SV=1 - [F1CL89_CAI] | 7,39  | 1 | 0 | 1 | 2 |
| J9P1D7     | Uncharacterized protein OS=Canis lupus familiaris PE=4 SV=1 - [J9P1D7_CANLF]                                | 7,2   | 1 | 1 | 1 | 1 |
| F1PMK3     | Protein S100 OS=Canis lupus familiaris GN=S100A12 PE=3 SV=2 - [F1PMK3_CANLF]                                | 7,14  | 1 | 0 | 1 | 1 |
| F1P8T1     | Angiopoietin like 6 OS=Canis lupus familiaris GN=ANGPTL6 PE=4 SV=2 - [F1P8T1_CANLF]                         | 6,85  | 1 | 1 | 1 | 1 |
| E2RHD8     | TBC1 domain family member 7 OS=Canis lupus familiaris GN=TBC1D7 PE=4 SV=2 - [E2RHD8_CANLF]                  | 6,83  | 1 | 1 | 1 | 1 |
| E2RBW8     | Asporin OS=Canis lupus familiaris GN=ASPN PE=3 SV=1 - [E2RBW8_CANLF]                                        | 6,72  | 1 | 1 | 1 | 1 |
| J9P8N2     | Acid sensing ion channel subunit 1 OS=Canis lupus familiaris GN=ASIC1 PE=3 SV=1 - [J9P8N2_CANLF]            | 6,65  | 1 | 0 | 1 | 1 |
| E2R4M9     | Acid sensing ion channel subunit 1 OS=Canis lupus familiaris GN=ASIC1 PE=3 SV=1 - [E2R4M9_CANLF]            | 6,26  | 1 | 0 | 1 | 1 |
| F1Q3A2     | Transmembrane protease serine OS=Canis lupus familiaris GN=TMPRSS11E PE=3 SV=2 - [F1Q3A2_CANLF]             | 6,16  | 1 | 1 | 1 | 1 |
| F1P6Z9     | Cell adhesion molecule 1 OS=Canis lupus familiaris GN=CADM1 PE=4 SV=2 - [F1P6Z9_CANLF]                      | 6     | 1 | 0 | 1 | 1 |
| E2RR20     | 5-formyltetrahydrofolate cyclase OS=Canis lupus familiaris GN=MTHFS PE=3 SV=1 - [E2RR20_CANLF]              | 5,91  | 1 | 1 | 1 | 1 |
| F1P702     | Cell adhesion molecule 1 OS=Canis lupus familiaris GN=CADM1 PE=4 SV=2 - [F1P702_CANLF]                      | 5,81  | 1 | 0 | 1 | 1 |
| J9NXC3     | Reticulophagy regulator family member 2 OS=Canis lupus familiaris GN=RETREG2 PE=4 SV=1 - [J9NXC3_CANLF]     | 5,75  | 1 | 0 | 1 | 1 |
| J9P8L6     | Pim-3 proto-oncogene, serine/threonine kinase OS=Canis lupus familiaris GN=PIM3 PE=4 SV=1 - [J9P8L6_CANL]   | 5,65  | 1 | 1 | 1 | 1 |
| J9JHX9     | Uncharacterized protein OS=Canis lupus familiaris PE=4 SV=1 - [J9JHX9_CANLF]                                | 5,6   | 1 | 0 | 1 | 1 |
| J9NUF3     | Uncharacterized protein OS=Canis lupus familiaris PE=4 SV=1 - [J9NUF3_CANLF]                                | 5,6   | 1 | 0 | 1 | 1 |
| F1PTB5     | Reticulophagy regulator family member 2 OS=Canis lupus familiaris GN=RETREG2 PE=4 SV=1 - [F1PTB5_CANLF]     | 5,52  | 1 | 0 | 1 | 1 |
| J9NX69     | Cleavage stimulation factor subunit 2 OS=Canis lupus familiaris GN=CSTF2 PE=4 SV=1 - [J9NX69_CANLF]         | 5,5   | 1 | 0 | 1 | 1 |
| A0A0E3V377 | Uncharacterized protein OS=Pasteurella multocida subsp. multocida OH4807 GN=I926_03560 PE=4 SV=1 - [A0A]    | 5,42  | 1 | 1 | 1 | 1 |
| E2QQT8     | Uncharacterized protein OS=Canis lupus familiaris GN=SQRDL PE=4 SV=1 - [E2QQT8_CANLF]                       | 5,33  | 1 | 1 | 1 | 1 |
| F1P7M7     | Cell adhesion molecule 1 OS=Canis lupus familiaris GN=CADM1 PE=4 SV=2 - [F1P7M7_CANLF]                      | 5,26  | 1 | 0 | 1 | 1 |
| F1PYN6     | Ribonucleoprotein, PTB binding 2 OS=Canis lupus familiaris GN=RAVER2 PE=4 SV=2 - [F1PYN6_CANLF]             | 5,12  | 1 | 1 | 1 | 1 |
| E2RJ41     | Protein-L-isoaspartate (D-aspartate) O-methyltransferase domain containing 2 OS=Canis lupus familiaris GN=P | 5,08  | 1 | 1 | 1 | 1 |
| E2RP40     | Cleavage stimulation factor subunit 2 OS=Canis lupus familiaris GN=CSTF2 PE=4 SV=2 - [E2RP40_CANLF]         | 4,85  | 1 | 0 | 1 | 1 |
| J9POY5     | Transmembrane protein 225 OS=Canis lupus familiaris GN=TMEM225 PE=4 SV=1 - [J9POY5_CANLF]                   | 4,82  | 1 | 1 | 1 | 1 |
| F1PCT5     | DNA polymerase nu OS=Canis lupus familiaris GN=POLN PE=4 SV=1 - [F1PCT5_CANLF]                              | 4,76  | 1 | 0 | 1 | 1 |
| J9NYP5     | Ubiquitin conjugating enzyme E2 J2 OS=Canis lupus familiaris GN=UBE2J2 PE=3 SV=1 - [J9NYP5_CANLF]           | 4,63  | 1 | 0 | 1 | 1 |
| F1PTD0     | F-box and WD repeat domain containing 8 OS=Canis lupus familiaris GN=FBXW8 PE=4 SV=2 - [F1PTD0_CANLF]       | 4,5   | 1 | 0 | 1 | 1 |
| E2RJ60     | DEAD-box helicase 17 OS=Canis lupus familiaris GN=DDX17 PE=3 SV=2 - [E2RJ60_CANLF]                          | 4,31  | 1 | 0 | 1 | 1 |
| J9PAP3     | Formin binding protein 1 OS=Canis lupus familiaris GN=FNBP1 PE=4 SV=1 - [J9PAP3_CANLF]                      | 4,25  | 1 | 0 | 1 | 1 |
| F1PM22     | GTP:AMP phosphotransferase AK3, mitochondrial OS=Canis lupus familiaris GN=AK3 PE=3 SV=2 - [F1PM22_CA]      | 4,24  | 1 | 1 | 1 | 1 |
| F1P9I9     | Carboxypeptidase OS=Canis lupus familiaris GN=CTSA PE=3 SV=1 - [F1P9I9_CANLF]                               | 4,21  | 1 | 1 | 1 | 1 |
| E2QX45     | A-kinase anchoring protein 8 like OS=Canis lupus familiaris GN=AKAP8L PE=3 SV=2 - [E2QX45_CANLF]            | 4,07  | 1 | 1 | 1 | 1 |
| E2RP13     | Interferon regulatory factor 5 OS=Canis lupus familiaris GN=IRF5 PE=3 SV=2 - [E2RP13_CANLF]                 | 4,05  | 1 | 0 | 1 | 1 |
| J9NT77     | F-box and WD repeat domain containing 8 OS=Canis lupus familiaris GN=FBXW8 PE=4 SV=1 - [J9NT77_CANLF]       | 3,99  | 1 | 0 | 1 | 1 |
| J9P5P1     | HDGF like 2 OS=Canis lupus familiaris GN=HDGFL2 PE=4 SV=1 - [J9P5P1_CANLF]                                  | 3,9   | 1 | 0 | 1 | 1 |
| F1PDC8     | Sine oculis binding protein homolog OS=Canis lupus familiaris GN=SOBP PE=4 SV=2 - [F1PDC8_CANLF]            | 3,89  | 1 | 0 | 1 | 1 |
| F1PID8     | DEAD-box helicase 17 OS=Canis lupus familiaris GN=DDX17 PE=3 SV=2 - [F1PID8_CANLF]                          | 3,8   | 1 | 0 | 1 | 1 |
| J9NT05     | Uncharacterized protein OS=Canis lupus familiaris PE=4 SV=1 - [J9NT05_CANLF]                                | 3,74  | 1 | 1 | 1 | 1 |
| F1P787     | Very low density lipoprotein receptor OS=Canis lupus familiaris GN=VLDLR PE=4 SV=2 - [F1P787_CANLF]         | 3,67  | 1 | 0 | 1 | 1 |
| F1PPG7     | Armadillo repeat containing 3 OS=Canis lupus familiaris GN=ARMC3 PE=4 SV=2 - [F1PPG7_CANLF]                 | 3,58  | 1 | 1 | 1 | 1 |
| F1P783     | Very low density lipoprotein receptor OS=Canis lupus familiaris GN=VLDLR PE=4 SV=2 - [F1P783_CANLF]         | 3,55  | 1 | 0 | 1 | 1 |
| E2QW67     | TSPY like 2 OS=Canis lupus familiaris GN=TSPYL2 PE=3 SV=2 - [E2QW67_CANLF]                                  | 3,47  | 1 | 1 | 1 | 1 |
| E2RP14     | Interferon regulatory factor 5 OS=Canis lupus familiaris GN=IRF5 PE=3 SV=2 - [E2RP14_CANLF]                 | 3,47  | 1 | 0 | 1 | 1 |
| E2RGE1     | Ras and Rab interactor 1 OS=Canis lupus familiaris GN=RIN1 PE=4 SV=2 - [E2RGE1_CANLF]                       | 3,18  | 1 | 1 | 1 | 1 |
| A0A0E3V3R3 | Fumarate reductase flavoprotein subunit OS=Pasteurella multocida subsp. multocida OH4807 GN=I926_05880      | 3,16  | 1 | 1 | 1 | 1 |
| F1PER9     | Formin binding protein 1 OS=Canis lupus familiaris GN=FNBP1 PE=4 SV=2 - [F1PER9_CANLF]                      | 3,09  | 1 | 0 | 1 | 1 |
| J9NXC0     | DNA polymerase nu OS=Canis lupus familiaris GN=POLN PE=4 SV=1 - [J9NXC0_CANLF]                              | 3,01  | 1 | 0 | 1 | 1 |
| F1Q4K4     | HDGF like 2 OS=Canis lupus familiaris GN=HDGFL2 PE=4 SV=2 - [F1Q4K4_CANLF]                                  | 3     | 1 | 0 | 1 | 1 |
| J9PBM9     | Carnitine O-octanoyltransferase OS=Canis lupus familiaris GN=CROT PE=3 SV=1 - [J9PBM9_CANLF]                | 2,94  | 1 | 0 | 1 | 1 |
| E2RLZ3     | Carnitine O-octanoyltransferase OS=Canis lupus familiaris GN=CROT PE=3 SV=1 - [E2RLZ3_CANLF]                | 2,93  | 1 | 0 | 1 | 1 |
| J9JHF4     | DNA polymerase nu OS=Canis lupus familiaris GN=POLN PE=4 SV=1 - [J9JHF4_CANLF]                              | 2,89  | 1 | 0 | 1 | 1 |
| F1PGI5     | BRCA1 associated protein OS=Canis lupus familiaris GN=BRAP PE=4 SV=2 - [F1PGI5_CANLF]                       | 2,87  | 1 | 1 | 1 | 1 |
| J9NZ53     | Nucleoporin like 2 OS=Canis lupus familiaris GN=NUPL2 PE=4 SV=1 - [J9NZ53_CANLF]                            | 2,86  | 1 | 1 | 1 | 1 |
| A0A0E3V4M4 | Uncharacterized protein OS=Pasteurella multocida subsp. multocida OH4807 GN=I926_06745 PE=3 SV=1 - [A0A]    | 2,73  | 1 | 1 | 1 | 1 |
| F6XHP7     | Centrosomal protein 104 OS=Canis lupus familiaris GN=CEP104 PE=4 SV=1 - [F6XHP7_CANLF]                      | 2,7   | 1 | 1 | 1 | 1 |
| G3FJC4     | Olfactory receptor OS=Canis lupus familiaris PE=3 SV=1 - [G3FJC4_CANLF]                                     | 2,61  | 1 | 0 | 1 | 1 |
| E2RA74     | Serine/threonine-protein kinase receptor OS=Canis lupus familiaris GN=BMPRI1B PE=3 SV=2 - [E2RA74_CANLF]    | 2,59  | 1 | 1 | 1 | 1 |
| G3FJDO     | Olfactory receptor OS=Canis lupus familiaris PE=3 SV=1 - [G3FJDO_CANLF]                                     | 2,48  | 1 | 0 | 1 | 1 |
| F1PW78     | Olfactory receptor OS=Canis lupus familiaris GN=OR11H6 PE=3 SV=2 - [F1PW78_CANLF]                           | 2,42  | 1 | 0 | 1 | 1 |
| F1P6G8     | Olfactory receptor OS=Canis lupus familiaris GN=LOC610553 PE=3 SV=1 - [F1P6G8_CANLF]                        | 2,41  | 1 | 0 | 1 | 1 |
| E2RB43     | RNA polymerase II associated protein 3 OS=Canis lupus familiaris GN=RPAP3 PE=4 SV=1 - [E2RB43_CANLF]        | 2,41  | 1 | 1 | 1 | 1 |
| E2QUAO     | Structural maintenance of chromosomes 6 OS=Canis lupus familiaris GN=SMC6 PE=4 SV=1 - [E2QUAO_CANLF]        | 2,37  | 1 | 1 | 1 | 1 |
| J9NZ10     | Uncharacterized protein OS=Canis lupus familiaris GN=LOC100684414 PE=3 SV=1 - [J9NZ10_CANLF]                | 2,3   | 1 | 1 | 1 | 1 |



|            |                                                                                                           |      |   |   |   |   |
|------------|-----------------------------------------------------------------------------------------------------------|------|---|---|---|---|
| A0A0E3ZSC1 | TonB-dependent receptor, beta-barrel domain protein OS=Pasteurella multocida subsp. multocida OH4807 GN   | 2,28 | 1 | 1 | 1 | 1 |
| A0A0K2CW89 | Major outer capsid protein OS=African horse sickness virus 8 GN=VP2 PE=4 SV=1 - [A0A0K2CW89_AHSV8]        | 2,27 | 1 | 0 | 1 | 1 |
| A0A189RMU8 | Major outer capsid protein OS=African horse sickness virus 8 GN=VP2 PE=4 SV=1 - [A0A189RMU8_AHSV8]        | 2,27 | 1 | 0 | 1 | 1 |
| A0A189RMP6 | Major outer capsid protein OS=African horse sickness virus 8 GN=VP2 PE=4 SV=1 - [A0A189RMP6_AHSV8]        | 2,27 | 1 | 0 | 1 | 1 |
| A0A189RMU0 | Major outer capsid protein OS=African horse sickness virus 8 GN=VP2 PE=4 SV=1 - [A0A189RMU0_AHSV8]        | 2,27 | 1 | 0 | 1 | 1 |
| A0A0N9MOB3 | VP2 OS=African horse sickness virus 8 GN=VP2 PE=4 SV=1 - [A0A0N9MOB3_AHSV8]                               | 2,27 | 1 | 0 | 1 | 1 |
| A0A0U2DCW1 | VP2 OS=African horse sickness virus 8 GN=VP2 PE=4 SV=1 - [A0A0U2DCW1_AHSV8]                               | 2,27 | 1 | 0 | 1 | 1 |
| F1PKP6     | Cytohesin 1 OS=Canis lupus familiaris GN=CYTH1 PE=4 SV=2 - [F1PKP6_CANLF]                                 | 2,25 | 1 | 1 | 1 | 1 |
| Q8HYB7     | Thyroid peroxidase OS=Canis lupus familiaris GN=TPO PE=2 SV=2 - [PERT_CANLF]                              | 2,01 | 1 | 1 | 1 | 1 |
| A0A0E3ZPY5 | Molybdenum import ATP-binding protein ModC OS=Pasteurella multocida subsp. multocida OH4807 GN=modC       | 1,99 | 1 | 1 | 1 | 1 |
| A0A0K2UX58 | Phospholipase A2activating protein [Canis lupus familiaris] OS=Lepeophtheirus salmons GN=PLAA PE=4 SV=1 - | 1,88 | 1 | 1 | 1 | 1 |
| J9P7J2     | Procollagen C-endopeptidase enhancer 2 OS=Canis lupus familiaris GN=PCOLCE2 PE=4 SV=1 - [J9P7J2_CANLF]    | 1,88 | 1 | 0 | 1 | 1 |
| B5LB12     | Nephroretinin 4 OS=Canis lupus familiaris GN=NPHP4 PE=2 SV=2 - [B5LB12_CANLF]                             | 1,82 | 1 | 0 | 1 | 1 |
| F1PP46     | PHD finger protein 2 OS=Canis lupus familiaris GN=PHF2 PE=4 SV=2 - [F1PP46_CANLF]                         | 1,78 | 1 | 0 | 1 | 1 |
| F1PH12     | Serum response factor OS=Canis lupus familiaris GN=SRF PE=4 SV=2 - [F1PH12_CANLF]                         | 1,77 | 1 | 1 | 1 | 1 |
| F1PY38     | Nephrocystin 4 OS=Canis lupus familiaris GN=NPHP4 PE=4 SV=2 - [F1PY38_CANLF]                              | 1,73 | 1 | 0 | 1 | 1 |
| J9P6K3     | PHD finger protein 2 OS=Canis lupus familiaris GN=PHF2 PE=4 SV=1 - [J9P6K3_CANLF]                         | 1,73 | 1 | 0 | 1 | 1 |
| E2R7L9     | Procollagen C-endopeptidase enhancer 2 OS=Canis lupus familiaris GN=PCOLCE2 PE=4 SV=1 - [E2R7L9_CANLF]    | 1,69 | 1 | 0 | 1 | 1 |
| F1Q2U2     | Chromodomain helicase DNA binding protein 1 like OS=Canis lupus familiaris GN=CHD1L PE=4 SV=2 - [F1Q2U2_  | 1,67 | 1 | 1 | 1 | 1 |
| F1PHQ7     | Calcium-transporting ATPase OS=Canis lupus familiaris GN=ATP2B4 PE=3 SV=2 - [F1PHQ7_CANLF]                | 1,58 | 1 | 1 | 1 | 1 |
| F1P759     | Membrane associated guanylate kinase, WW and PDZ domain containing 3 OS=Canis lupus familiaris GN=MAG     | 1,56 | 1 | 0 | 1 | 1 |
| J9P535     | Membrane associated guanylate kinase, WW and PDZ domain containing 3 OS=Canis lupus familiaris GN=MAG     | 1,48 | 1 | 0 | 1 | 1 |
| F1Q129     | Collagen type IV alpha 2 chain OS=Canis lupus familiaris GN=COL4A2 PE=3 SV=2 - [F1Q129_CANLF]             | 1,43 | 1 | 1 | 1 | 1 |
| A0A0E3ZNI0 | Pyruvate formate-lyase OS=Pasteurella multocida subsp. multocida OH4807 GN=I926_03145 PE=4 SV=1 - [A0A    | 1,42 | 1 | 1 | 1 | 1 |
| E2RL01     | Uncharacterized protein OS=Canis lupus familiaris GN=ACACA PE=4 SV=2 - [E2RL01_CANLF]                     | 1,41 | 1 | 1 | 1 | 1 |
| A0A189RMV9 | RNA-dependent RNA polymerase OS=African horse sickness virus 1 GN=VP1 PE=4 SV=1 - [A0A189RMV9_AHSV        | 1,38 | 1 | 0 | 1 | 2 |
| A0A189RMT6 | RNA-dependent RNA polymerase OS=African horse sickness virus 4 GN=VP1 PE=4 SV=1 - [A0A189RMT6_AHSV        | 1,38 | 1 | 0 | 1 | 2 |
| A0A0U2DHF6 | VP1 OS=African horse sickness virus 8 GN=VP1 PE=4 SV=1 - [A0A0U2DHF6_AHSV8]                               | 1,38 | 1 | 0 | 1 | 2 |
| O70695     | RNA-directed RNA polymerase OS=African horse sickness virus 9 GN=51 PE=3 SV=1 - [RDRP_AHSV9]              | 1,38 | 1 | 0 | 1 | 2 |
| A0A0H4M9Q0 | RNA-dependent RNA polymerase OS=African horse sickness virus 3 GN=VP1 PE=4 SV=1 - [A0A0H4M9Q0_AHSV        | 1,38 | 1 | 0 | 1 | 2 |
| A0A189RMZ1 | RNA-dependent RNA polymerase OS=African horse sickness virus 4 GN=VP1 PE=4 SV=1 - [A0A189RMZ1_AHSV        | 1,38 | 1 | 0 | 1 | 2 |
| A0A0H4M9P0 | RNA-dependent RNA polymerase OS=African horse sickness virus 4 GN=VP1 PE=4 SV=1 - [A0A0H4M9P0_AHSV        | 1,38 | 1 | 0 | 1 | 2 |
| A0A189RMW1 | RNA-dependent RNA polymerase OS=African horse sickness virus 4 GN=VP1 PE=4 SV=1 - [A0A189RMW1_AHSV        | 1,38 | 1 | 0 | 1 | 2 |
| A0A0N7CXB9 | RNA-dependent RNA polymerase OS=African horse sickness virus 4 GN=VP1 PE=4 SV=1 - [A0A0N7CXB9_AHSV4       | 1,38 | 1 | 0 | 1 | 2 |
| A0A051MMR4 | VP1 OS=African horse sickness virus 1 GN=VP1 PE=4 SV=1 - [A0A051MMR4_AHSV1]                               | 1,38 | 1 | 0 | 1 | 2 |
| A0A0N7CWH4 | RNA-dependent RNA polymerase OS=African horse sickness virus 2 GN=VP1 PE=4 SV=1 - [A0A0N7CWH4_AHSV        | 1,38 | 1 | 0 | 1 | 2 |
| A0A0N7CZP1 | VP1 OS=African horse sickness virus 1 GN=VP1 PE=4 SV=1 - [A0A0N7CZP1_AHSV1]                               | 1,38 | 1 | 0 | 1 | 2 |
| A0A189RN03 | RNA-dependent RNA polymerase OS=African horse sickness virus 6 GN=VP1 PE=4 SV=1 - [A0A189RN03_AHSV6       | 1,38 | 1 | 0 | 1 | 2 |
| A0A0N9LT4  | RNA-dependent RNA polymerase OS=African horse sickness virus 6 GN=VP1 PE=4 SV=1 - [A0A0N9LT4_AHSV6        | 1,38 | 1 | 0 | 1 | 2 |
| A0A189RMZ7 | RNA-dependent RNA polymerase OS=African horse sickness virus 6 GN=VP1 PE=4 SV=1 - [A0A189RMZ7_AHSV6       | 1,38 | 1 | 0 | 1 | 2 |
| A0A189RN01 | RNA-dependent RNA polymerase OS=African horse sickness virus 5 GN=VP1 PE=4 SV=1 - [A0A189RN01_AHSV5       | 1,38 | 1 | 0 | 1 | 2 |
| A0A0N6WIG9 | RNA-dependent RNA polymerase OS=African horse sickness virus 5 GN=VP1 PE=4 SV=1 - [A0A0N6WIG9_AHSV5       | 1,38 | 1 | 0 | 1 | 2 |
| A0A191JFA6 | RNA-dependent RNA polymerase OS=African horse sickness virus 9 GN=VP1 PE=4 SV=1 - [A0A191JFA6_AHSV9]      | 1,38 | 1 | 0 | 1 | 2 |
| A0A0N7CWA7 | RNA-dependent RNA polymerase OS=African horse sickness virus 9 GN=VP1 PE=4 SV=1 - [A0A0N7CWA7_AHSV9       | 1,38 | 1 | 0 | 1 | 2 |
| A0A191JF81 | RNA-dependent RNA polymerase OS=African horse sickness virus 9 GN=VP1 PE=4 SV=1 - [A0A191JF81_AHSV9]      | 1,38 | 1 | 0 | 1 | 2 |
| A0A0N7CWB3 | RNA-dependent RNA polymerase OS=African horse sickness virus 7 GN=VP1 PE=4 SV=2 - [A0A0N7CWB3_AHSV7       | 1,38 | 1 | 0 | 1 | 2 |
| A0A189RN13 | RNA-dependent RNA polymerase OS=African horse sickness virus 7 GN=VP1 PE=4 SV=1 - [A0A189RN13_AHSV7       | 1,38 | 1 | 0 | 1 | 2 |
| A0A189RMT8 | RNA-dependent RNA polymerase OS=African horse sickness virus 2 GN=VP1 PE=4 SV=1 - [A0A189RMT8_AHSV2       | 1,38 | 1 | 0 | 1 | 2 |
| A0A051NJ35 | RNA-dependent RNA polymerase OS=African horse sickness virus 1 GN=VP1 PE=4 SV=1 - [A0A051NJ35_AHSV1]      | 1,38 | 1 | 0 | 1 | 2 |
| A0A0P0R4M5 | VP1 OS=African horse sickness virus 1 GN=VP1 PE=4 SV=1 - [A0A0P0R4M5_AHSV1]                               | 1,38 | 1 | 0 | 1 | 2 |
| A0A0N7CZY0 | RNA-dependent RNA polymerase OS=African horse sickness virus 1 GN=VP1 PE=4 SV=1 - [A0A0N7CZY0_AHSV1]      | 1,38 | 1 | 0 | 1 | 2 |
| A0A051NIK5 | VP1 OS=African horse sickness virus 4 GN=VP1 PE=4 SV=1 - [A0A051NIK5_AHSV4]                               | 1,38 | 1 | 0 | 1 | 2 |
| A0A189RMY3 | RNA-dependent RNA polymerase OS=African horse sickness virus 4 GN=VP1 PE=4 SV=1 - [A0A189RMY3_AHSV4       | 1,38 | 1 | 0 | 1 | 2 |
| A0A189RMX8 | RNA-dependent RNA polymerase OS=African horse sickness virus 4 GN=VP1 PE=4 SV=1 - [A0A189RMX8_AHSV4       | 1,38 | 1 | 0 | 1 | 2 |
| A0A189RMX9 | RNA-dependent RNA polymerase OS=African horse sickness virus 4 GN=VP1 PE=4 SV=1 - [A0A189RMX9_AHSV4       | 1,38 | 1 | 0 | 1 | 2 |
| A0A189RMY2 | RNA-dependent RNA polymerase OS=African horse sickness virus 4 GN=VP1 PE=4 SV=1 - [A0A189RMY2_AHSV4       | 1,38 | 1 | 0 | 1 | 2 |
| A0A051MMI4 | VP1 OS=African horse sickness virus 1 GN=VP1 PE=4 SV=1 - [A0A051MMI4_AHSV1]                               | 1,38 | 1 | 0 | 1 | 2 |
| A0A0P0IR13 | VP1 OS=African horse sickness virus 1 GN=VP1 PE=4 SV=1 - [A0A0P0IR13_AHSV1]                               | 1,38 | 1 | 0 | 1 | 2 |
| A0A051MMG5 | VP1 OS=African horse sickness virus 1 GN=VP1 PE=4 SV=1 - [A0A051MMG5_AHSV1]                               | 1,38 | 1 | 0 | 1 | 2 |
| A0A1V0CK12 | RNA-dependent RNA polymerase OS=African horse sickness virus 1 PE=4 SV=1 - [A0A1V0CK12_AHSV1]             | 1,38 | 1 | 0 | 1 | 2 |
| A0A1S6Q499 | VP1 OS=African horse sickness virus 1 PE=4 SV=1 - [A0A1S6Q499_AHSV1]                                      | 1,38 | 1 | 0 | 1 | 2 |
| A0A051MMZ5 | VP1 OS=African horse sickness virus 1 GN=VP1 PE=4 SV=1 - [A0A051MMZ5_AHSV1]                               | 1,38 | 1 | 0 | 1 | 2 |
| A0A189RMW2 | RNA-dependent RNA polymerase OS=African horse sickness virus 1 GN=VP1 PE=4 SV=1 - [A0A189RMW2_AHSV        | 1,38 | 1 | 0 | 1 | 2 |
| A0A191JF95 | RNA-dependent RNA polymerase OS=African horse sickness virus 9 GN=VP1 PE=4 SV=1 - [A0A191JF95_AHSV9]      | 1,38 | 1 | 0 | 1 | 2 |
| A0A189RMZ2 | RNA-dependent RNA polymerase OS=African horse sickness virus 9 GN=VP1 PE=4 SV=1 - [A0A189RMZ2_AHSV9]      | 1,38 | 1 | 0 | 1 | 2 |
| A0A189RN11 | RNA-dependent RNA polymerase OS=African horse sickness virus 6 GN=VP1 PE=4 SV=1 - [A0A189RN11_AHSV6       | 1,38 | 1 | 0 | 1 | 2 |
| A0A189RMZ0 | RNA-dependent RNA polymerase OS=African horse sickness virus 6 GN=VP1 PE=4 SV=1 - [A0A189RMZ0_AHSV6       | 1,38 | 1 | 0 | 1 | 2 |
| A0A0N7CWA1 | VP1 OS=African horse sickness virus 6 GN=VP1 PE=4 SV=1 - [A0A0N7CWA1_AHSV6]                               | 1,38 | 1 | 0 | 1 | 2 |
| A0A189RMV1 | RNA-dependent RNA polymerase OS=African horse sickness virus 6 GN=VP1 PE=4 SV=1 - [A0A189RMV1_AHSV6       | 1,38 | 1 | 0 | 1 | 2 |
| A0A189RMY1 | RNA-dependent RNA polymerase OS=African horse sickness virus 6 GN=VP1 PE=4 SV=1 - [A0A189RMY1_AHSV6       | 1,38 | 1 | 0 | 1 | 2 |
| A0A0N7FMJ0 | VP1 OS=African horse sickness virus 8 GN=VP1 PE=4 SV=1 - [A0A0N7FMJ0_AHSV8]                               | 1,38 | 1 | 0 | 1 | 2 |
| A0A189RN07 | RNA-dependent RNA polymerase OS=African horse sickness virus 7 GN=VP1 PE=4 SV=1 - [A0A189RN07_AHSV7       | 1,38 | 1 | 0 | 1 | 2 |
| A0A189RN20 | RNA-dependent RNA polymerase OS=African horse sickness virus 7 GN=VP1 PE=4 SV=1 - [A0A189RN20_AHSV7       | 1,38 | 1 | 0 | 1 | 2 |
| A0A189RMZ5 | RNA-dependent RNA polymerase OS=African horse sickness virus 7 GN=VP1 PE=4 SV=1 - [A0A189RMZ5_AHSV7       | 1,38 | 1 | 0 | 1 | 2 |
| A0A0N9LPF7 | VP1 OS=African horse sickness virus 7 GN=VP1 PE=4 SV=1 - [A0A0N9LPF7_AHSV7]                               | 1,38 | 1 | 0 | 1 | 2 |
| A0A189RMW9 | RNA-dependent RNA polymerase OS=African horse sickness virus 3 GN=VP1 PE=4 SV=1 - [A0A189RMW9_AHSV        | 1,38 | 1 | 0 | 1 | 2 |
| A0A189RMV0 | RNA-dependent RNA polymerase OS=African horse sickness virus 3 GN=VP1 PE=4 SV=1 - [A0A189RMV0_AHSV        | 1,38 | 1 | 0 | 1 | 2 |
| A0A0N7CXM3 | VP1 OS=African horse sickness virus 3 GN=VP1 PE=4 SV=1 - [A0A0N7CXM3_AHSV3]                               | 1,38 | 1 | 0 | 1 | 2 |
| A0A189RMX7 | RNA-dependent RNA polymerase OS=African horse sickness virus 3 GN=VP1 PE=4 SV=1 - [A0A189RMX7_AHSV3       | 1,38 | 1 | 0 | 1 | 2 |
| A0A189RMX2 | RNA-dependent RNA polymerase OS=African horse sickness virus 3 GN=VP1 PE=4 SV=1 - [A0A189RMX2_AHSV3       | 1,38 | 1 | 0 | 1 | 2 |
| A0A0U2DGS4 | VP1 OS=African horse sickness virus 5 GN=VP1 PE=4 SV=1 - [A0A0U2DGS4_AHSV5]                               | 1,38 | 1 | 0 | 1 | 2 |
| A0A189RMU6 | RNA-dependent RNA polymerase OS=African horse sickness virus 5 GN=VP1 PE=4 SV=1 - [A0A189RMU6_AHSV        | 1,38 | 1 | 0 | 1 | 2 |
| A0A189RMZ3 | RNA-dependent RNA polymerase OS=African horse sickness virus 5 GN=VP1 PE=4 SV=1 - [A0A189RMZ3_AHSV5       | 1,38 | 1 | 0 | 1 | 2 |
| A0A0N7CW95 | VP1 OS=African horse sickness virus 5 GN=VP1 PE=4 SV=1 - [A0A0N7CW95_AHSV5]                               | 1,38 | 1 | 0 | 1 | 2 |
| A0A189RMZ6 | RNA-dependent RNA polymerase OS=African horse sickness virus 5 GN=VP1 PE=4 SV=1 - [A0A189RMZ6_AHSV5       | 1,38 | 1 | 0 | 1 | 2 |
| A0A189RMX1 | RNA-dependent RNA polymerase OS=African horse sickness virus 5 GN=VP1 PE=4 SV=1 - [A0A189RMX1_AHSV5       | 1,38 | 1 | 0 | 1 | 2 |
| A0A189RN25 | RNA-dependent RNA polymerase OS=African horse sickness virus 8 GN=VP1 PE=4 SV=1 - [A0A189RN25_AHSV8       | 1,38 | 1 | 0 | 1 | 2 |
| A0A189RN04 | RNA-dependent RNA polymerase OS=African horse sickness virus 8 GN=VP1 PE=4 SV=1 - [A0A189RN04_AHSV8       | 1,38 | 1 | 0 | 1 | 2 |
| A0A189RN24 | RNA-dependent RNA polymerase OS=African horse sickness virus 8 GN=VP1 PE=4 SV=1 - [A0A189RN24_AHSV8       | 1,38 | 1 | 0 | 1 | 2 |
| A0A189RMW7 | RNA-dependent RNA polymerase OS=African horse sickness virus 2 GN=VP1 PE=4 SV=1 - [A0A189RMW7_AHSV2       | 1,38 | 1 | 0 | 1 | 2 |
| A0A0N7CWG8 | RNA-dependent RNA polymerase OS=African horse sickness virus 3 GN=VP1 PE=4 SV=1 - [A0A0N7CWG8_AHSV        | 1,38 | 1 | 0 | 1 | 2 |
| A0A189RN28 | RNA-dependent RNA polymerase OS=African horse sickness virus 9 GN=VP1 PE=4 SV=1 - [A0A189RN28_AHSV9       | 1,38 | 1 | 0 | 1 | 2 |
| A0A189RMS1 | RNA-dependent RNA polymerase OS=African horse sickness virus 3 GN=VP1 PE=4 SV=1 - [A0A189RMS1_AHSV3       | 1,38 | 1 | 0 | 1 | 2 |

|            |                                                                                                                                |       |   |   |   |   |
|------------|--------------------------------------------------------------------------------------------------------------------------------|-------|---|---|---|---|
| A0A189RMY8 | RNA-dependent RNA polymerase OS=African horse sickness virus 5 GN=VP1 PE=4 SV=1 - [A0A189RMY8_AHSV]                            | 1,38  | 1 | 0 | 1 | 2 |
| A0A189RMY9 | RNA-dependent RNA polymerase OS=African horse sickness virus 5 GN=VP1 PE=4 SV=1 - [A0A189RMY9_AHSV]                            | 1,38  | 1 | 0 | 1 | 2 |
| A0A0U2DH27 | VP1 OS=African horse sickness virus 5 GN=VP1 PE=4 SV=1 - [A0A0U2DH27_AHSV]                                                     | 1,38  | 1 | 0 | 1 | 2 |
| A0A189RMU1 | RNA-dependent RNA polymerase OS=African horse sickness virus 5 GN=VP1 PE=4 SV=1 - [A0A189RMU1_AHSV]                            | 1,38  | 1 | 0 | 1 | 2 |
| A0A189RMX6 | RNA-dependent RNA polymerase OS=African horse sickness virus 5 GN=VP1 PE=4 SV=1 - [A0A189RMX6_AHSV]                            | 1,38  | 1 | 0 | 1 | 2 |
| J9P7W0     | Coiled-coil domain containing 180 OS=Canis lupus familiaris GN=CCDC180 PE=4 SV=1 - [J9P7W0_CANLF]                              | 1,33  | 1 | 0 | 1 | 1 |
| A0A0E3ZPT2 | Aconitate hydratase B OS=Pasteurella multocida subsp. multocida OH4807 GN=I926_05860 PE=3 SV=1 - [A0A0E3ZPT2]                  | 1,27  | 1 | 1 | 1 | 1 |
| F1PHT0     | La ribonucleoprotein domain family member 1 OS=Canis lupus familiaris GN=LARP1 PE=4 SV=2 - [F1PHT0_CANLF]                      | 1,26  | 1 | 1 | 1 | 4 |
| J9P224     | Interleukin 1 receptor like 1 OS=Canis lupus familiaris GN=IL1RL1 PE=4 SV=1 - [J9P224_CANLF]                                   | 1,26  | 1 | 0 | 1 | 1 |
| F1PMN6     | Uncharacterized protein OS=Canis lupus familiaris PE=4 SV=2 - [F1PMN6_CANLF]                                                   | 1,26  | 1 | 0 | 1 | 1 |
| E2RBJ9     | Tudor and KH domain containing OS=Canis lupus familiaris GN=TRDKH PE=4 SV=2 - [E2RBJ9_CANLF]                                   | 1,24  | 1 | 0 | 1 | 1 |
| E2RTL2     | Tubulin tyrosine ligase like 6 OS=Canis lupus familiaris GN=TTL6 PE=4 SV=2 - [E2RTL2_CANLF]                                    | 1,24  | 1 | 1 | 1 | 1 |
| F1PSF7     | Interleukin 1 receptor like 1 OS=Canis lupus familiaris GN=IL1RL1 PE=4 SV=1 - [F1PSF7_CANLF]                                   | 1,23  | 1 | 0 | 1 | 1 |
| F1PJ16     | Coiled-coil domain containing 180 OS=Canis lupus familiaris GN=CCDC180 PE=4 SV=2 - [F1PJ16_CANLF]                              | 1,19  | 1 | 0 | 1 | 1 |
| J9NTK0     | Transmembrane protein 94 OS=Canis lupus familiaris GN=TMEM94 PE=4 SV=1 - [J9NTK0_CANLF]                                        | 1,18  | 1 | 0 | 1 | 1 |
| F1PD09     | Transmembrane protein 94 OS=Canis lupus familiaris GN=TMEM94 PE=4 SV=2 - [F1PD09_CANLF]                                        | 1,17  | 1 | 0 | 1 | 1 |
| J9PAM1     | Uncharacterized protein OS=Canis lupus familiaris PE=4 SV=1 - [J9PAM1_CANLF]                                                   | 1,17  | 1 | 0 | 1 | 1 |
| J9P0T0     | Tudor and KH domain containing OS=Canis lupus familiaris GN=TRDKH PE=4 SV=1 - [J9P0T0_CANLF]                                   | 1,16  | 1 | 0 | 1 | 1 |
| J9NWE2     | Mbt domain containing 1 OS=Canis lupus familiaris GN=MBT1 PE=4 SV=1 - [J9NWE2_CANLF]                                           | 1,12  | 1 | 0 | 1 | 2 |
| F6V7F8     | Vacuolar protein sorting 13 homolog C OS=Canis lupus familiaris GN=VPS13C PE=4 SV=1 - [F6V7F8_CANLF]                           | 1,03  | 1 | 1 | 1 | 1 |
| F1PHJ2     | BTB domain containing 11 OS=Canis lupus familiaris GN=BTBD11 PE=4 SV=2 - [F1PHJ2_CANLF]                                        | 0,99  | 1 | 1 | 1 | 1 |
| E2RBZ1     | Mbt domain containing 1 OS=Canis lupus familiaris GN=MBT1 PE=4 SV=2 - [E2RBZ1_CANLF]                                           | 0,92  | 1 | 0 | 1 | 2 |
| F1PGV0     | Clathrin heavy chain OS=Canis lupus familiaris GN=CLTCL1 PE=3 SV=2 - [F1PGV0_CANLF]                                            | 0,91  | 1 | 1 | 1 | 1 |
| E2RNJ6     | Uncharacterized protein OS=Canis lupus familiaris PE=4 SV=2 - [E2RNJ6_CANLF]                                                   | 0,91  | 1 | 1 | 1 | 1 |
| F1PTY4     | ZFP28 zinc finger protein OS=Canis lupus familiaris GN=ZFP28 PE=3 SV=2 - [F1PTY4_CANLF]                                        | 0,87  | 1 | 0 | 1 | 1 |
| Q5I2M8     | Toll-like receptor 9 OS=Canis lupus familiaris GN=TLR9 PE=2 SV=1 - [TLR9_CANLF]                                                | 0,87  | 1 | 0 | 1 | 1 |
| Q865B9     | Toll-like receptor 9 protein OS=Canis lupus familiaris GN=TLR9 PE=2 SV=2 - [Q865B9_CANLF]                                      | 0,87  | 1 | 0 | 1 | 1 |
| E2R8V4     | Uncharacterized protein OS=Canis lupus familiaris GN=LOC478038 PE=4 SV=2 - [E2R8V4_CANLF]                                      | 0,86  | 1 | 1 | 1 | 1 |
| E2RR85     | FAT atypical cadherin 4 OS=Canis lupus familiaris GN=FAT4 PE=4 SV=2 - [E2RR85_CANLF]                                           | 0,84  | 1 | 1 | 1 | 1 |
| J9P0I0     | ZFP28 zinc finger protein OS=Canis lupus familiaris GN=ZFP28 PE=3 SV=1 - [J9P0I0_CANLF]                                        | 0,81  | 1 | 0 | 1 | 1 |
| F1Q4D7     | Uncharacterized protein OS=Canis lupus familiaris GN=DNAH12 PE=4 SV=2 - [F1Q4D7_CANLF]                                         | 0,78  | 1 | 0 | 1 | 1 |
| F1P9F8     | GRIP and coiled-coil domain containing 2 OS=Canis lupus familiaris GN=GCC2 PE=4 SV=2 - [F1P9F8_CANLF]                          | 0,77  | 1 | 1 | 1 | 1 |
| F1PF68     | Transient receptor potential cation channel subfamily M member 3 OS=Canis lupus familiaris GN=TRPM3 PE=4 SV=1 - [F1PF68_CANLF] | 0,76  | 1 | 1 | 1 | 1 |
| Q7YRF5     | Cardiac titin (Fragment) OS=Canis lupus familiaris GN=TTN PE=2 SV=1 - [Q7YRF5_CANLF]                                           | 0,76  | 1 | 0 | 1 | 1 |
| J9NWP4     | Dedicator of cytokinesis 7 OS=Canis lupus familiaris GN=DOCK7 PE=3 SV=1 - [J9NWP4_CANLF]                                       | 0,74  | 1 | 0 | 1 | 2 |
| F1PTH3     | Chromodomain helicase DNA binding protein 6 OS=Canis lupus familiaris GN=CHD6 PE=4 SV=2 - [F1PTH3_CANLF]                       | 0,74  | 1 | 0 | 1 | 1 |
| J9P0F6     | Chromodomain helicase DNA binding protein 6 OS=Canis lupus familiaris GN=CHD6 PE=4 SV=1 - [J9P0F6_CANLF]                       | 0,74  | 1 | 0 | 1 | 1 |
| E2RIX9     | Family with sequence similarity 193 member A OS=Canis lupus familiaris GN=FAM193A PE=4 SV=2 - [E2RIX9_CANLF]                   | 0,71  | 1 | 1 | 1 | 1 |
| F1PPR3     | Dedicator of cytokinesis 7 OS=Canis lupus familiaris GN=DOCK7 PE=3 SV=2 - [F1PPR3_CANLF]                                       | 0,7   | 1 | 0 | 1 | 2 |
| J9NYC7     | Uncharacterized protein OS=Canis lupus familiaris GN=DNAH12 PE=4 SV=1 - [J9NYC7_CANLF]                                         | 0,66  | 1 | 0 | 1 | 1 |
| F1P988     | Vacuolar protein sorting 13 homolog D OS=Canis lupus familiaris GN=VPS13D PE=4 SV=2 - [F1P988_CANLF]                           | 0,66  | 1 | 0 | 1 | 1 |
| E2RIU6     | Inositol polyphosphate-4-phosphatase type I A OS=Canis lupus familiaris GN=INPP4A PE=4 SV=2 - [E2RIU6_CANLF]                   | 0,62  | 1 | 0 | 1 | 3 |
| F1PAP5     | Spectrin alpha, non-erythrocytic 1 OS=Canis lupus familiaris GN=SPTAN1 PE=4 SV=2 - [F1PAP5_CANLF]                              | 0,61  | 1 | 0 | 1 | 1 |
| J9P2H0     | Spectrin alpha, non-erythrocytic 1 OS=Canis lupus familiaris GN=SPTAN1 PE=4 SV=1 - [J9P2H0_CANLF]                              | 0,61  | 1 | 0 | 1 | 1 |
| J9NTH2     | Ankyrin 2 OS=Canis lupus familiaris GN=ANK2 PE=4 SV=1 - [J9NTH2_CANLF]                                                         | 0,58  | 1 | 0 | 1 | 1 |
| F1PE29     | Shroom family member 3 OS=Canis lupus familiaris GN=SHROOM3 PE=4 SV=2 - [F1PE29_CANLF]                                         | 0,55  | 1 | 1 | 1 | 4 |
| F1PB36     | MYC binding protein 2, E3 ubiquitin protein ligase OS=Canis lupus familiaris GN=MYCBP2 PE=4 SV=2 - [F1PB36_CANLF]              | 0,54  | 1 | 0 | 1 | 3 |
| J9PB77     | MYC binding protein 2, E3 ubiquitin protein ligase OS=Canis lupus familiaris GN=MYCBP2 PE=4 SV=1 - [J9PB77_CANLF]              | 0,53  | 1 | 0 | 1 | 3 |
| E2R4S1     | Zinc finger homeobox 4 OS=Canis lupus familiaris GN=ZFXH4 PE=4 SV=1 - [E2R4S1_CANLF]                                           | 0,52  | 1 | 1 | 1 | 1 |
| E2RNN1     | Inositol polyphosphate-4-phosphatase type I A OS=Canis lupus familiaris GN=INPP4A PE=4 SV=2 - [E2RNN1_CANLF]                   | 0,5   | 1 | 0 | 1 | 3 |
| J9NY57     | Ankyrin 2 OS=Canis lupus familiaris GN=ANK2 PE=4 SV=1 - [J9NY57_CANLF]                                                         | 0,4   | 1 | 0 | 1 | 1 |
| F1P6P1     | Ankyrin 2 OS=Canis lupus familiaris GN=ANK2 PE=4 SV=1 - [F1P6P1_CANLF]                                                         | 0,31  | 1 | 0 | 1 | 1 |
| F1Q262     | Spen family transcriptional repressor OS=Canis lupus familiaris GN=SPEN PE=4 SV=2 - [F1Q262_CANLF]                             | 0,24  | 1 | 0 | 1 | 1 |
| Q6QT48     | Proteasome alpha subunit type 7 (Fragment) OS=Canis lupus familiaris PE=2 SV=1 - [Q6QT48_CANLF]                                | 13,89 | 1 | 0 | 1 | 1 |
| J9P8C8     | Synaptonemal complex protein 1 OS=Canis lupus familiaris GN=SYCP1 PE=4 SV=1 - [J9P8C8_CANLF]                                   | 11,07 | 1 | 0 | 1 | 2 |
| E2RNT5     | Inverted formin, FH2 and WH2 domain containing OS=Canis lupus familiaris GN=INF2 PE=4 SV=2 - [E2RNT5_CANLF]                    | 6,8   | 1 | 0 | 1 | 1 |
| F1PL72     | Dystrobrevin beta OS=Canis lupus familiaris GN=DTNB PE=4 SV=2 - [F1PL72_CANLF]                                                 | 5,88  | 1 | 0 | 1 | 1 |
| E2RE92     | Uncharacterized protein OS=Canis lupus familiaris GN=RNFI13A PE=4 SV=2 - [E2RE92_CANLF]                                        | 5,46  | 1 | 1 | 1 | 1 |
| E2R4H4     | Proteasome endopeptidase complex OS=Canis lupus familiaris GN=PSMA5 PE=3 SV=2 - [E2R4H4_CANLF]                                 | 5,46  | 1 | 1 | 1 | 2 |
| P06940     | Phosphoprotein OS=Canine distemper virus (strain Onderstepoort) GN=P/V PE=3 SV=1 - [PHOSP_CDVO]                                | 5,33  | 1 | 0 | 1 | 1 |
| Q77K13     | Phosphoprotein P OS=Canine distemper virus (strain Onderstepoort) PE=4 SV=1 - [Q77K13_CDVO]                                    | 5,33  | 1 | 0 | 1 | 1 |
| J9NVA0     | Phosphoribosyl pyrophosphate synthetase associated protein 1 OS=Canis lupus familiaris GN=PRPSAP1 PE=4 SV=1                    | 5,19  | 1 | 0 | 1 | 1 |
| J9NVX0     | Coenzyme Q8A OS=Canis lupus familiaris GN=COQ8A PE=4 SV=1 - [J9NVX0_CANLF]                                                     | 4,37  | 1 | 0 | 1 | 1 |
| F6UP97     | DC-STAMP domain containing 2 OS=Canis lupus familiaris GN=DCST2 PE=4 SV=1 - [F6UP97_CANLF]                                     | 4,14  | 1 | 1 | 1 | 1 |
| E2QUB6     | Epsin 3 OS=Canis lupus familiaris GN=EPN3 PE=4 SV=1 - [E2QUB6_CANLF]                                                           | 4,09  | 1 | 1 | 1 | 1 |
| F1P8R3     | Villin like OS=Canis lupus familiaris GN=VILL PE=4 SV=2 - [F1P8R3_CANLF]                                                       | 4,04  | 1 | 1 | 1 | 1 |
| E2RGU8     | Vasoactive intestinal peptide receptor 1 OS=Canis lupus familiaris GN=VIPR1 PE=3 SV=2 - [E2RGU8_CANLF]                         | 3,68  | 1 | 1 | 1 | 2 |
| F1P191     | Homer scaffolding protein 2 OS=Canis lupus familiaris GN=HOMER2 PE=4 SV=2 - [F1P191_CANLF]                                     | 3,58  | 1 | 1 | 1 | 1 |
| F1PXX1     | EH domain containing 3 OS=Canis lupus familiaris GN=EH3 PE=3 SV=2 - [F1PXX1_CANLF]                                             | 3,55  | 1 | 1 | 1 | 1 |
| F1PYN7     | Tumor protein p73 OS=Canis lupus familiaris GN=TP73 PE=3 SV=2 - [F1PYN7_CANLF]                                                 | 3,48  | 1 | 1 | 1 | 1 |
| E2QXA2     | Coenzyme Q8A OS=Canis lupus familiaris GN=COQ8A PE=4 SV=2 - [E2QXA2_CANLF]                                                     | 3,1   | 1 | 0 | 1 | 1 |
| J9NYW3     | Uncharacterized protein OS=Canis lupus familiaris PE=4 SV=1 - [J9NYW3_CANLF]                                                   | 3,06  | 1 | 1 | 1 | 1 |
| E2RDK6     | Synaptonemal complex protein 1 OS=Canis lupus familiaris GN=SYCP1 PE=4 SV=2 - [E2RDK6_CANLF]                                   | 2,96  | 1 | 0 | 1 | 2 |
| J9NX31     | Synaptonemal complex protein 1 OS=Canis lupus familiaris GN=SYCP1 PE=4 SV=1 - [J9NX31_CANLF]                                   | 2,96  | 1 | 0 | 1 | 2 |
| E2RS84     | Dystrobrevin beta OS=Canis lupus familiaris GN=DTNB PE=4 SV=2 - [E2RS84_CANLF]                                                 | 2,91  | 1 | 0 | 1 | 1 |
| F1PJJ0     | Rabaptin, RAB GTPase binding effector protein 2 OS=Canis lupus familiaris GN=RABEP2 PE=4 SV=2 - [F1PJJ0_CANLF]                 | 2,83  | 1 | 0 | 1 | 2 |
| E2RF80     | Uncharacterized protein OS=Canis lupus familiaris GN=TRIM50 PE=4 SV=1 - [E2RF80_CANLF]                                         | 2,46  | 1 | 1 | 1 | 1 |
| E2RFP7     | Tyrosine kinase non receptor 2 OS=Canis lupus familiaris GN=TNK2 PE=3 SV=2 - [E2RFP7_CANLF]                                    | 2,4   | 1 | 1 | 1 | 1 |
| D6BR72     | Keratin 4 OS=Canis lupus familiaris GN=KRT71 PE=2 SV=1 - [D6BR72_CANLF]                                                        | 2,29  | 1 | 0 | 1 | 1 |
| E2QUT7     | Keratin 72 OS=Canis lupus familiaris GN=KRT72 PE=3 SV=2 - [E2QUT7_CANLF]                                                       | 2,29  | 1 | 0 | 1 | 1 |
| J9NXP4     | Sperm specific antigen 2 OS=Canis lupus familiaris GN=SSFA2 PE=4 SV=1 - [J9NXP4_CANLF]                                         | 2,27  | 1 | 0 | 1 | 1 |
| J9NU18     | ATP binding cassette subfamily A member 9 OS=Canis lupus familiaris GN=ABCA9 PE=4 SV=1 - [J9NU18_CANLF]                        | 2,23  | 1 | 0 | 1 | 1 |
| J9NVW2     | NME/NM23 family member 8 OS=Canis lupus familiaris GN=NME8 PE=4 SV=1 - [J9NVW2_CANLF]                                          | 2,12  | 1 | 0 | 1 | 1 |
| E2ROH3     | NME/NM23 family member 8 OS=Canis lupus familiaris GN=NME8 PE=4 SV=2 - [E2ROH3_CANLF]                                          | 2,05  | 1 | 0 | 1 | 1 |
| A0A0E3ZQ68 | Bacteriophage Mu transposase OS=Pasteurella multocida subsp. multocida OH4807 GN=I926_00980 PE=4 SV=1                          | 1,93  | 1 | 0 | 1 | 1 |
| F1PNV0     | Inositol polyphosphate phosphatase like 1 OS=Canis lupus familiaris GN=INPL1 PE=4 SV=2 - [F1PNV0_CANLF]                        | 1,74  | 1 | 0 | 1 | 1 |
| F1PU24     | Inverted formin, FH2 and WH2 domain containing OS=Canis lupus familiaris GN=INF2 PE=4 SV=2 - [F1PU24_CANLF]                    | 1,6   | 1 | 0 | 1 | 1 |
| E2RPX4     | WD repeat domain 44 OS=Canis lupus familiaris GN=WDR44 PE=4 SV=2 - [E2RPX4_CANLF]                                              | 1,54  | 1 | 1 | 1 | 1 |
| F1PFQ6     | Maestro heat like repeat family member 2A OS=Canis lupus familiaris GN=MROH2A PE=4 SV=2 - [F1PFQ6_CANLF]                       | 1,52  | 1 | 1 | 1 | 1 |
| F1PHF2     | Protein phosphatase 1 regulatory subunit 26 OS=Canis lupus familiaris GN=PPP1R26 PE=4 SV=2 - [F1PHF2_CANLF]                    | 1,44  | 1 | 1 | 1 | 1 |
| F1PPN9     | Immunoglobulin superfamily member 1 OS=Canis lupus familiaris GN=IGSF1 PE=4 SV=2 - [F1PPN9_CANLF]                              | 1,35  | 1 | 1 | 1 | 1 |
| E2R490     | ATP binding cassette subfamily A member 9 OS=Canis lupus familiaris GN=ABCA9 PE=4 SV=1 - [E2R490_CANLF]                        | 1,29  | 1 | 0 | 1 | 1 |
| J9PAE4     | Uncharacterized protein OS=Canis lupus familiaris PE=4 SV=1 - [J9PAE4_CANLF]                                                   | 1,14  | 1 | 0 | 1 | 1 |

|            |                                                                                                              |       |   |   |   |    |
|------------|--------------------------------------------------------------------------------------------------------------|-------|---|---|---|----|
| F1PHU6     | Uncharacterized protein OS=Canis lupus familiaris PE=4 SV=2 - [F1PHU6_CANLF]                                 | 1,12  | 1 | 0 | 1 | 1  |
| J9POF7     | Uncharacterized protein OS=Canis lupus familiaris PE=4 SV=1 - [J9POF7_CANLF]                                 | 1,06  | 1 | 0 | 1 | 1  |
| E2RQR8     | Ubiquitin protein ligase E3 component n-recogin 3 (putative) OS=Canis lupus familiaris GN=UBR3 PE=4 SV=2 -   | 1,05  | 1 | 1 | 1 | 1  |
| J9P486     | Uncharacterized protein OS=Canis lupus familiaris PE=4 SV=1 - [J9P486_CANLF]                                 | 0,75  | 1 | 1 | 1 | 1  |
| J9P5E9     | Uncharacterized protein OS=Canis lupus familiaris PE=4 SV=1 - [J9P5E9_CANLF]                                 | 14,29 | 1 | 1 | 1 | 2  |
| J9PBH5     | Proteasome endopeptidase complex OS=Canis lupus familiaris GN=PSMA8 PE=3 SV=1 - [J9PBH5_CANLF]               | 13,86 | 1 | 0 | 1 | 7  |
| J9NU62     | Uncharacterized protein OS=Canis lupus familiaris PE=4 SV=1 - [J9NU62_CANLF]                                 | 10,8  | 1 | 1 | 1 | 1  |
| J9JHC2     | Coiled-coil domain containing 167 OS=Canis lupus familiaris GN=CCDC167 PE=4 SV=1 - [J9JHC2_CANLF]            | 8,87  | 1 | 1 | 1 | 1  |
| J9POX0     | LYR motif containing 1 OS=Canis lupus familiaris GN=LYRM1 PE=3 SV=1 - [J9POX0_CANLF]                         | 8,86  | 1 | 1 | 1 | 1  |
| A0A0E3ZQZ9 | Fatty acid metabolism regulator protein OS=Pasteurella multocida subsp. multocida OH4807 GN=fadR PE=3 SV     | 7,88  | 1 | 1 | 1 | 1  |
| F1PFR3     | Histone-lysine N-methyltransferase OS=Canis lupus familiaris GN=SETD7 PE=3 SV=2 - [F1PFR3_CANLF]             | 7,65  | 1 | 1 | 1 | 1  |
| H9GX39     | Uncharacterized protein OS=Canis lupus familiaris PE=4 SV=2 - [H9GX39_CANLF]                                 | 5,58  | 1 | 1 | 1 | 1  |
| E2R6F4     | Suppressor APC domain containing 2 OS=Canis lupus familiaris GN=SAPCD2 PE=4 SV=1 - [E2R6F4_CANLF]            | 5,56  | 1 | 1 | 1 | 1  |
| E2R7F2     | Proteasome 26S subunit, non-ATPase 12 OS=Canis lupus familiaris GN=PSMD12 PE=4 SV=2 - [E2R7F2_CANLF]         | 5,28  | 1 | 0 | 1 | 1  |
| J9JHD9     | Proteasome 26S subunit, non-ATPase 12 OS=Canis lupus familiaris GN=PSMD12 PE=4 SV=1 - [J9JHD9_CANLF]         | 5,04  | 1 | 0 | 1 | 1  |
| F1PN51     | Basic leucine zipper nuclear factor 1 OS=Canis lupus familiaris GN=BLZF1 PE=4 SV=2 - [F1PN51_CANLF]          | 4,75  | 1 | 0 | 1 | 1  |
| J9NUY0     | Basic leucine zipper nuclear factor 1 OS=Canis lupus familiaris GN=BLZF1 PE=4 SV=1 - [J9NUY0_CANLF]          | 4,74  | 1 | 0 | 1 | 1  |
| H9GWB6     | Uncharacterized protein OS=Canis lupus familiaris GN=PPP1R7 PE=4 SV=2 - [H9GWB6_CANLF]                       | 4,67  | 1 | 0 | 1 | 1  |
| F1PLP6     | SIL1 nucleotide exchange factor OS=Canis lupus familiaris GN=SIL1 PE=4 SV=2 - [F1PLP6_CANLF]                 | 4,67  | 1 | 0 | 1 | 2  |
| E2R0J4     | Anthrax toxin receptor 2 OS=Canis lupus familiaris GN=ANTXR2 PE=4 SV=2 - [E2R0J4_CANLF]                      | 4,23  | 1 | 1 | 1 | 2  |
| Q28256     | Platelet glycoprotein Ib alpha chain OS=Canis lupus familiaris GN=GP1BA PE=2 SV=2 - [GP1BA_CANLF]            | 3,84  | 1 | 1 | 1 | 1  |
| E2RAF6     | Acyl-coenzyme A oxidase OS=Canis lupus familiaris GN=ACOX1 PE=3 SV=1 - [E2RAF6_CANLF]                        | 3,78  | 1 | 0 | 1 | 1  |
| F1P668     | Acyl-coenzyme A oxidase OS=Canis lupus familiaris GN=ACOX1 PE=3 SV=2 - [F1P668_CANLF]                        | 3,78  | 1 | 0 | 1 | 1  |
| E2RBT9     | Pellino E3 ubiquitin protein ligase family member 3 OS=Canis lupus familiaris GN=PELI3 PE=4 SV=2 - [E2RBT9_C | 3,6   | 1 | 0 | 1 | 1  |
| J9NZ14     | Uncharacterized protein OS=Canis lupus familiaris PE=4 SV=1 - [J9NZ14_CANLF]                                 | 3,49  | 1 | 0 | 1 | 1  |
| J9PAV0     | Pellino E3 ubiquitin protein ligase family member 3 OS=Canis lupus familiaris GN=PELI3 PE=4 SV=1 - [J9PAV0_C | 3,41  | 1 | 0 | 1 | 1  |
| F7J212     | p-selectin glycoprotein ligand-1 OS=Canis lupus familiaris GN=PSGL-1 PE=2 SV=1 - [F7J212_CANLF]              | 2,5   | 1 | 0 | 1 | 17 |
| J9P6Q9     | Selectin P ligand OS=Canis lupus familiaris GN=SELPLG PE=4 SV=1 - [J9P6Q9_CANLF]                             | 2,47  | 1 | 0 | 1 | 17 |
| F1Q4A3     | Coagulation factor X OS=Canis lupus familiaris GN=F10 PE=3 SV=2 - [F1Q4A3_CANLF]                             | 2,41  | 1 | 1 | 1 | 3  |
| E2R5W1     | Uncharacterized protein OS=Canis lupus familiaris GN=LOC482849 PE=4 SV=2 - [E2R5W1_CANLF]                    | 2,23  | 1 | 1 | 1 | 1  |
| E2RAU5     | Stress-70 protein, mitochondrial OS=Canis lupus familiaris GN=HSPA9 PE=3 SV=1 - [E2RAU5_CANLF]               | 2,06  | 1 | 1 | 1 | 1  |
| E2RJE0     | Cartilage oligomeric matrix protein OS=Canis lupus familiaris GN=COMP PE=4 SV=2 - [E2RJE0_CANLF]             | 2,01  | 1 | 0 | 1 | 1  |
| F1PXQ9     | TNF receptor associated protein 1 OS=Canis lupus familiaris GN=TRAP1 PE=3 SV=2 - [F1PXQ9_CANLF]              | 1,99  | 1 | 0 | 1 | 1  |
| J9NSW0     | TNF receptor associated protein 1 OS=Canis lupus familiaris GN=TRAP1 PE=3 SV=1 - [J9NSW0_CANLF]              | 1,99  | 1 | 0 | 1 | 1  |
| F6XYS8     | RUN and FYVE domain containing 3 OS=Canis lupus familiaris GN=RUFY3 PE=4 SV=1 - [F6XYS8_CANLF]               | 1,45  | 1 | 0 | 1 | 1  |
| F1PK46     | Histone-lysine N-methyltransferase OS=Canis lupus familiaris GN=NSD2 PE=4 SV=2 - [F1PK46_CANLF]              | 1,4   | 1 | 0 | 1 | 1  |
| J9NUG7     | Histone-lysine N-methyltransferase OS=Canis lupus familiaris GN=NSD2 PE=4 SV=1 - [J9NUG7_CANLF]              | 1,4   | 1 | 0 | 1 | 1  |
| E2QWL4     | B-TFIID TATA-box binding protein associated factor 1 OS=Canis lupus familiaris GN=BTAF1 PE=4 SV=2 - [E2QWL   | 1,12  | 1 | 1 | 1 | 1  |
| J9NZT8     | Protein phosphatase 4 regulatory subunit 3C, pseudogene OS=Canis lupus familiaris GN=PPP4R3CP PE=4 SV=1      | 0,89  | 1 | 0 | 1 | 1  |
| E2RT85     | Collagen type XIV alpha 1 chain OS=Canis lupus familiaris GN=COL14A1 PE=4 SV=2 - [E2RT85_CANLF]              | 0,79  | 1 | 1 | 1 | 2  |
| F6Y2P4     | Phospholipid-transporting ATPase OS=Canis lupus familiaris GN=ATP11B PE=3 SV=1 - [F6Y2P4_CANLF]              | 0,73  | 1 | 1 | 1 | 1  |
| F6Y5E4     | Centrosomal protein 131 OS=Canis lupus familiaris GN=CEP131 PE=4 SV=1 - [F6Y5E4_CANLF]                       | 0,74  | 1 | 1 | 1 | 1  |
| J9P9K1     | Forkhead box D3 OS=Canis lupus familiaris GN=FOXD3 PE=4 SV=1 - [J9P9K1_CANLF]                                | 8,11  | 1 | 0 | 1 | 5  |
| F6USR8     | Forkhead box D3 OS=Canis lupus familiaris GN=FOXD3 PE=4 SV=1 - [F6USR8_CANLF]                                | 6,83  | 1 | 0 | 1 | 5  |
| E2R822     | USH1 protein network component harmonin binding protein 1 OS=Canis lupus familiaris GN=USHBP1 PE=4 SV=       | 1,56  | 1 | 1 | 1 | 1  |
| F1PPT8     | LON peptidase N-terminal domain and ring finger 2 OS=Canis lupus familiaris GN=LONRF2 PE=4 SV=2 - [F1PPT8    | 2,44  | 1 | 0 | 1 | 1  |
| F1PKA7     | Interferon regulatory factor 4 OS=Canis lupus familiaris GN=IRF4 PE=3 SV=2 - [F1PKA7_CANLF]                  | 4,63  | 1 | 1 | 1 | 1  |
| F1PHZ7     | CUB and Sushi multiple domains 2 OS=Canis lupus familiaris GN=CSDM2 PE=4 SV=2 - [F1PHZ7_CANLF]               | 0,69  | 1 | 0 | 1 | 2  |
| E2R911     | Uncharacterized protein OS=Canis lupus familiaris GN=TAF9 PE=4 SV=2 - [E2R911_CANLF]                         | 5,28  | 1 | 0 | 1 | 1  |
| E2R1Y6     | Secreted phosphoprotein 1 OS=Canis lupus familiaris GN=SP1 PE=4 SV=2 - [E2R1Y6_CANLF]                        | 7,58  | 1 | 0 | 1 | 2  |
| Q6F3J0     | Nuclear factor NF-kappa-B p105 subunit OS=Canis lupus familiaris GN=NFKB1 PE=2 SV=2 - [NFKB1_CANLF]          | 2,06  | 1 | 0 | 1 | 1  |
| A0A0A0MPC3 | Nuclear factor NF-kappa-B p105 subunit OS=Canis lupus familiaris GN=NFKB1 PE=4 SV=1 - [A0A0A0MPC3_CAN        | 2     | 1 | 0 | 1 | 1  |
| A1XFH3     | NFKB1 (Fragment) OS=Canis lupus familiaris PE=2 SV=1 - [A1XFH3_CANLF]                                        | 26,32 | 1 | 0 | 1 | 1  |
| F1PB94     | Mitochondrial ribosomal protein L4 OS=Canis lupus familiaris GN=MRPL4 PE=3 SV=2 - [F1PB94_CANLF]             | 10,2  | 1 | 1 | 1 | 1  |
| J9NX42     | Uncharacterized protein OS=Canis lupus familiaris PE=4 SV=1 - [J9NX42_CANLF]                                 | 13,66 | 1 | 1 | 1 | 1  |
| J9PBH2     | Uncharacterized protein OS=Canis lupus familiaris PE=4 SV=1 - [J9PBH2_CANLF]                                 | 5,22  | 1 | 1 | 1 | 1  |
| F6JUMY5    | Uncharacterized protein OS=Canis lupus familiaris PE=4 SV=1 - [F6JUMY5_CANLF]                                | 4,87  | 1 | 1 | 1 | 1  |
| Q9SLE9     | GAPDH (Fragment) OS=Canis lupus familiaris PE=2 SV=1 - [Q9SLE9_CANLF]                                        | 31,88 | 1 | 0 | 1 | 2  |
| Q9TV07     | Glyceraldehyde-3-phosphate dehydrogenase (Fragment) OS=Canis lupus familiaris PE=2 SV=1 - [Q9TV07_CANL       | 20    | 1 | 0 | 1 | 2  |
| Q0QET4     | Glyceraldehyde-3-phosphate dehydrogenase (Fragment) OS=Canis lupus familiaris GN=GAPDH PE=2 SV=1 - [Q0       | 9,82  | 1 | 0 | 1 | 2  |
| A0A0A0WE41 | Receptor tyrosine-protein kinase erbB-2 (Fragment) OS=Canis lupus familiaris PE=2 SV=1 - [A0A0A0WE41_CAN     | 7,97  | 1 | 0 | 1 | 1  |
| J9NZ39     | Uncharacterized protein OS=Canis lupus familiaris PE=3 SV=1 - [J9NZ39_CANLF]                                 | 6,77  | 1 | 0 | 1 | 2  |
| E2RNI4     | Glyceraldehyde-3-phosphate dehydrogenase OS=Canis lupus familiaris PE=3 SV=2 - [E2RNI4_CANLF]                | 6,63  | 1 | 0 | 1 | 2  |
| E2RNN4     | Uncharacterized protein OS=Canis lupus familiaris PE=3 SV=1 - [E2RNN4_CANLF]                                 | 6,61  | 1 | 0 | 1 | 2  |
| F1PFN3     | Glyceraldehyde-3-phosphate dehydrogenase OS=Canis lupus familiaris GN=LOC106558132 PE=3 SV=2 - [F1PFN        | 6,61  | 1 | 0 | 1 | 2  |
| L7N0H7     | Glyceraldehyde-3-phosphate dehydrogenase OS=Canis lupus familiaris GN=LOC100683724 PE=3 SV=1 - [L7N0H        | 6,61  | 1 | 0 | 1 | 2  |
| J9P5S8     | Ectonucleoside triphosphate diphosphohydrolase 5 OS=Canis lupus familiaris GN=ENTPD5 PE=3 SV=1 - [J9P5S8     | 5,94  | 1 | 1 | 1 | 1  |
| A0A060PY73 | ERBB2 protein (Fragment) OS=Canis lupus familiaris GN=ERBB2 PE=2 SV=1 - [A0A060PY73_CANLF]                   | 5,01  | 1 | 0 | 1 | 1  |
| J9PBA3     | Uncharacterized protein OS=Canis lupus familiaris PE=3 SV=1 - [J9PBA3_CANLF]                                 | 4,69  | 1 | 0 | 1 | 2  |
| A0A0E3ZSG5 | Lysophospholipase L2 OS=Pasteurella multocida subsp. multocida OH4807 GN=1926_08095 PE=4 SV=1 - [A0A0E       | 4,32  | 1 | 1 | 1 | 2  |
| F1PPL9     | Uncharacterized protein OS=Canis lupus familiaris GN=C1QTNF3 PE=4 SV=2 - [F1PPL9_CANLF]                      | 4,08  | 1 | 1 | 1 | 3  |
| J9P366     | Ganglioside induced differentiation associated protein 2 OS=Canis lupus familiaris GN=GDAP2 PE=4 SV=1 - [J9P | 4,03  | 1 | 0 | 1 | 1  |
| E2RCF0     | Ganglioside induced differentiation associated protein 2 OS=Canis lupus familiaris GN=GDAP2 PE=4 SV=1 - [E2F | 4,02  | 1 | 0 | 1 | 1  |
| E2RBI4     | Intermediate filament family orphan 1 OS=Canis lupus familiaris GN=IFFO1 PE=4 SV=1 - [E2RBI4_CANLF]          | 3,37  | 1 | 1 | 1 | 1  |
| J9NXE8     | Zinc finger protein 541 OS=Canis lupus familiaris GN=ZNF541 PE=4 SV=1 - [J9NXE8_CANLF]                       | 2,87  | 1 | 0 | 1 | 1  |
| E2RSC6     | Semaphorin 6D OS=Canis lupus familiaris GN=SEMA6D PE=3 SV=2 - [E2RSC6_CANLF]                                 | 2,49  | 1 | 1 | 1 | 1  |
| F1PNN3     | Zinc finger protein 541 OS=Canis lupus familiaris GN=ZNF541 PE=4 SV=2 - [F1PNN3_CANLF]                       | 2,21  | 1 | 0 | 1 | 1  |
| J9NY16     | Zinc finger protein 541 OS=Canis lupus familiaris GN=ZNF541 PE=4 SV=1 - [J9NY16_CANLF]                       | 2,18  | 1 | 0 | 1 | 1  |
| J9NYD8     | Zinc finger protein 541 OS=Canis lupus familiaris GN=ZNF541 PE=4 SV=1 - [J9NYD8_CANLF]                       | 2,18  | 1 | 0 | 1 | 1  |
| E2QXLO     | GRIP1 associated protein 1 OS=Canis lupus familiaris GN=GRIPAP1 PE=4 SV=2 - [E2QXLO_CANLF]                   | 1,97  | 1 | 0 | 1 | 1  |
| A0A0K6G4V7 | Cingulin [Canis lupus familiaris] OS=Rhizoctonia solani GN=RSOLAG22IIIB_10913 PE=4 SV=1 - [A0A0K6G4V7_9H     | 1,95  | 1 | 1 | 1 | 1  |
| A8WED5     | Receptor protein-tyrosine kinase (Fragment) OS=Canis lupus familiaris PE=2 SV=1 - [A8WED5_CANLF]             | 1,93  | 1 | 0 | 1 | 1  |
| F1PIQ9     | Receptor protein-tyrosine kinase OS=Canis lupus familiaris GN=ERBB2 PE=3 SV=2 - [F1PIQ9_CANLF]               | 1,9   | 1 | 0 | 1 | 1  |
| E2QWT9     | GRIP1 associated protein 1 OS=Canis lupus familiaris GN=GRIPAP1 PE=4 SV=2 - [E2QWT9_CANLF]                   | 1,9   | 1 | 0 | 1 | 1  |
| F6UPV2     | Transcription initiation factor TFIID subunit OS=Canis lupus familiaris GN=TAF1 PE=3 SV=1 - [F6UPV2_CANLF]   | 1,69  | 1 | 0 | 1 | 1  |
| J9NZ21     | Transcription initiation factor TFIID subunit OS=Canis lupus familiaris GN=TAF1 PE=3 SV=1 - [J9NZ21_CANLF]   | 1,66  | 1 | 0 | 1 | 1  |
| A0A0E3ZN11 | UvrABC system protein C OS=Pasteurella multocida subsp. multocida OH4807 GN=uvrC PE=3 SV=1 - [A0A0E3Z1       | 1,64  | 1 | 1 | 1 | 1  |
| F1PUS7     | Capping protein regulator and myosin 1 linker 1 OS=Canis lupus familiaris GN=CARMIL1 PE=4 SV=2 - [F1PUS7_C   | 1,47  | 1 | 0 | 1 | 1  |
| F1PUS0     | Capping protein regulator and myosin 1 linker 1 OS=Canis lupus familiaris GN=CARMIL1 PE=4 SV=2 - [F1PUS0_C   | 1,41  | 1 | 0 | 1 | 1  |
| A0A0E3ZSB9 | RNA polymerase-associated protein RapA OS=Pasteurella multocida subsp. multocida OH4807 GN=rapA PE=3 SV=     | 1,03  | 1 | 1 | 1 | 1  |
| F6Y3D7     | WDFY family member 4 OS=Canis lupus familiaris GN=WDFY4 PE=4 SV=1 - [F6Y3D7_CANLF]                           | 0,77  | 1 | 0 | 1 | 1  |
| E2QUV0     | Nipped-B protein OS=Canis lupus familiaris GN=NIPBL PE=3 SV=2 - [E2QUV0_CANLF]                               | 0,7   | 1 | 0 | 1 | 1  |
| J9NZL2     | Nipped-B protein OS=Canis lupus familiaris GN=NIPBL PE=3 SV=1 - [J9NZL2_CANLF]                               | 0,68  | 1 | 0 | 1 | 1  |

|            |                                                                                                               |       |   |   |   |   |
|------------|---------------------------------------------------------------------------------------------------------------|-------|---|---|---|---|
| J9P3A7     | Nipped-B protein OS=Canis lupus familiaris GN=NIPBL PE=3 SV=1 - [J9P3A7_CANLF]                                | 0,68  | 1 | 0 | 1 | 1 |
| J9P6G6     | Nipped-B protein OS=Canis lupus familiaris GN=NIPBL PE=3 SV=1 - [J9P6G6_CANLF]                                | 0,68  | 1 | 0 | 1 | 1 |
| Q3ZE66     | Transducin alpha 1 (Fragment) OS=Canis lupus GN=GNAT1 PE=4 SV=1 - [Q3ZE66_CANLU]                              | 28,05 | 1 | 0 | 1 | 1 |
| E2RC50     | Chromosome 11 open reading frame 88 OS=Canis lupus familiaris GN=C11orf88 PE=4 SV=1 - [E2RC50_CANLF]          | 19,76 | 1 | 1 | 1 | 1 |
| J9PAR2     | Exosome component 2 OS=Canis lupus familiaris GN=EXOSC2 PE=4 SV=1 - [J9PAR2_CANLF]                            | 9,84  | 1 | 0 | 1 | 1 |
| J9NUF5     | Exosome component 2 OS=Canis lupus familiaris GN=EXOSC2 PE=4 SV=1 - [J9NUF5_CANLF]                            | 9,73  | 1 | 0 | 1 | 1 |
| F1PXA6     | Uncharacterized protein OS=Canis lupus familiaris GN=LOC492173 PE=4 SV=2 - [F1PXA6_CANLF]                     | 9,28  | 1 | 1 | 1 | 1 |
| J9NT30     | CDKN2A interacting protein OS=Canis lupus familiaris GN=CDKN2AIP PE=4 SV=1 - [J9NT30_CANLF]                   | 9,01  | 1 | 0 | 1 | 1 |
| F1PBE1     | ABI family member 3 OS=Canis lupus familiaris GN=ABI3 PE=4 SV=2 - [F1PBE1_CANLF]                              | 8,31  | 1 | 1 | 1 | 1 |
| E2RKL1     | Protein phosphatase 1 regulatory inhibitor subunit 2 pseudogene 9 OS=Canis lupus familiaris GN=PPP1R2P9 PE    | 8,17  | 1 | 1 | 1 | 1 |
| J9P800     | Calcium and integrin binding family member 2 OS=Canis lupus familiaris GN=CIB2 PE=4 SV=1 - [J9P800_CANLF]     | 8,02  | 1 | 1 | 1 | 1 |
| E2R3Y6     | Keratin 32 OS=Canis lupus familiaris GN=KRT32 PE=3 SV=1 - [E2R3Y6_CANLF]                                      | 7,09  | 1 | 1 | 1 | 1 |
| F6Y478     | Uncharacterized protein OS=Canis lupus familiaris PE=3 SV=1 - [F6Y478_CANLF]                                  | 6,67  | 1 | 1 | 1 | 1 |
| J9P3P3     | FUN14 domain containing 2 OS=Canis lupus familiaris GN=FUNDC2 PE=4 SV=1 - [J9P3P3_CANLF]                      | 6,63  | 1 | 0 | 1 | 2 |
| Q28300     | Guanine nucleotide-binding protein G(t) subunit alpha-1 OS=Canis lupus familiaris GN=GNAT1 PE=2 SV=2 - [GN    | 6,57  | 1 | 0 | 1 | 1 |
| J9P0R3     | Uncharacterized protein OS=Canis lupus familiaris PE=4 SV=1 - [J9P0R3_CANLF]                                  | 6,36  | 1 | 0 | 1 | 1 |
| J9NXW2     | Exosome component 2 OS=Canis lupus familiaris GN=EXOSC2 PE=4 SV=1 - [J9NXW2_CANLF]                            | 6,14  | 1 | 0 | 1 | 1 |
| J9NT46     | Uncharacterized protein OS=Canis lupus familiaris PE=4 SV=1 - [J9NT46_CANLF]                                  | 6,12  | 1 | 1 | 1 | 1 |
| F6UY88     | Exosome component 2 OS=Canis lupus familiaris GN=EXOSC2 PE=4 SV=1 - [F6UY88_CANLF]                            | 5,96  | 1 | 0 | 1 | 1 |
| L7N0L6     | Uncharacterized protein OS=Canis lupus familiaris PE=4 SV=1 - [L7N0L6_CANLF]                                  | 5,93  | 1 | 1 | 1 | 1 |
| F1PDH0     | FUN14 domain containing 2 OS=Canis lupus familiaris GN=FUNDC2 PE=4 SV=2 - [F1PDH0_CANLF]                      | 5,82  | 1 | 0 | 1 | 2 |
| J9P2B1     | Uncharacterized protein OS=Canis lupus familiaris GN=FYTTD1 PE=4 SV=1 - [J9P2B1_CANLF]                        | 5,66  | 1 | 0 | 1 | 1 |
| F1PU59     | Prenylcysteine oxidase 1 like OS=Canis lupus familiaris GN=PCYOX1L PE=4 SV=2 - [F1PU59_CANLF]                 | 5,45  | 1 | 1 | 1 | 1 |
| A0A0E3V3Q7 | Protein YgiX OS=Pasteurella multocida subsp. multocida OH4807 GN=I926_05805 PE=4 SV=1 - [A0A0E3V3Q7_F         | 5,38  | 1 | 1 | 1 | 1 |
| F1PWX8     | CDKN2A interacting protein OS=Canis lupus familiaris GN=CDKN2AIP PE=4 SV=2 - [F1PWX8_CANLF]                   | 5,19  | 1 | 0 | 1 | 1 |
| E2QY10     | Secreted frizzled related protein 4 OS=Canis lupus familiaris GN=SFRP4 PE=4 SV=1 - [E2QY10_CANLF]             | 5,19  | 1 | 1 | 1 | 2 |
| A0A0E3ZPB3 | Uncharacterized protein OS=Pasteurella multocida subsp. multocida OH4807 GN=I926_04180 PE=4 SV=1 - [A0/       | 4,93  | 1 | 1 | 1 | 1 |
| F1P6B8     | Intraflagellar transport 57 OS=Canis lupus familiaris GN=IFT57 PE=4 SV=2 - [F1P6B8_CANLF]                     | 4,9   | 1 | 1 | 1 | 1 |
| A0A0E3V4L1 | Alanine racemase OS=Pasteurella multocida subsp. multocida OH4807 GN=alr PE=3 SV=1 - [A0A0E3V4L1_PAS          | 4,75  | 1 | 1 | 1 | 1 |
| A0A0E3V3L9 | Fumarate hydratase class II OS=Pasteurella multocida subsp. multocida OH4807 GN=fumC PE=3 SV=1 - [A0A0E       | 4,53  | 1 | 0 | 1 | 1 |
| F6XKGO     | Uncharacterized protein OS=Canis lupus familiaris PE=4 SV=1 - [F6XKGO_CANLF]                                  | 4,35  | 1 | 1 | 1 | 1 |
| E2QTM7     | Tetrapeptide repeat domain 26 OS=Canis lupus familiaris GN=TTCT26 PE=4 SV=1 - [E2QTM7_CANLF]                  | 3,97  | 1 | 1 | 1 | 1 |
| E2RTM1     | Neurofibromin 2 OS=Canis lupus familiaris GN=NF2 PE=4 SV=2 - [E2RTM1_CANLF]                                   | 3,89  | 1 | 0 | 1 | 3 |
| E2QZZ2     | Neurofibromin 2 OS=Canis lupus familiaris GN=NF2 PE=1 SV=1 - [E2QZZ2_CANLF]                                   | 3,86  | 1 | 0 | 1 | 3 |
| E2RJW7     | Adducin 1 OS=Canis lupus familiaris GN=ADD1 PE=4 SV=2 - [E2RJW7_CANLF]                                        | 3,77  | 1 | 0 | 1 | 1 |
| F1PN02     | Osteoclast stimulatory transmembrane protein OS=Canis lupus familiaris GN=OCSTAMP PE=4 SV=2 - [F1PN02_        | 3,72  | 1 | 1 | 1 | 1 |
| E2RJV9     | Adducin 1 OS=Canis lupus familiaris GN=ADD1 PE=4 SV=2 - [E2RJV9_CANLF]                                        | 3,56  | 1 | 0 | 1 | 1 |
| F1PTE0     | Serine and arginine rich splicing factor 6 OS=Canis lupus familiaris GN=SRSF6 PE=4 SV=2 - [F1PTE0_CANLF]      | 3,49  | 1 | 0 | 1 | 1 |
| O77704     | Desmocollin type 2 (Fragment) OS=Canis lupus familiaris GN=DSC2 PE=2 SV=1 - [O77704_CANLF]                    | 3,44  | 1 | 1 | 1 | 1 |
| J9NXS1     | Uncharacterized protein OS=Canis lupus familiaris GN=DCAF8 PE=4 SV=1 - [J9NXS1_CANLF]                         | 3,36  | 1 | 1 | 1 | 1 |
| F6XIL7     | Olfactory receptor OS=Canis lupus familiaris GN=OR4S1 PE=3 SV=1 - [F6XIL7_CANLF]                              | 3,24  | 1 | 1 | 1 | 2 |
| F1P556     | Solute carrier family 3 member 1 OS=Canis lupus familiaris GN=SLC3A1 PE=4 SV=1 - [F1P556_CANLF]               | 3,14  | 1 | 0 | 1 | 1 |
| Q9GKM3     | Amino acid transporter SLC3A1 OS=Canis lupus familiaris PE=2 SV=1 - [Q9GKM3_CANLF]                            | 3,14  | 1 | 0 | 1 | 1 |
| F1P7Q9     | Nedd4 family interacting protein 2 OS=Canis lupus familiaris GN=NDFIP2 PE=4 SV=2 - [F1P7Q9_CANLF]             | 3,12  | 1 | 1 | 1 | 2 |
| E2RFR6     | GATA zinc finger domain containing 2B OS=Canis lupus familiaris GN=GATAD2B PE=4 SV=1 - [E2RFR6_CANLF]         | 3,04  | 1 | 0 | 1 | 1 |
| F1Q018     | Sphingomyelin phosphodiesterase OS=Canis lupus familiaris GN=SMPD1 PE=3 SV=2 - [F1Q018_CANLF]                 | 2,73  | 1 | 1 | 1 | 1 |
| J9NU60     | GATA zinc finger domain containing 2B OS=Canis lupus familiaris GN=GATAD2B PE=4 SV=1 - [J9NU60_CANLF]         | 2,69  | 1 | 0 | 1 | 1 |
| F1PEZ0     | Serine and arginine rich splicing factor 4 OS=Canis lupus familiaris GN=SRSF4 PE=4 SV=2 - [F1PEZ0_CANLF]      | 2,51  | 1 | 0 | 1 | 1 |
| J9P6A6     | RNA binding motif protein 44 OS=Canis lupus familiaris GN=RBM44 PE=4 SV=1 - [J9P6A6_CANLF]                    | 2,19  | 1 | 0 | 1 | 1 |
| J9NUX6     | Protein phosphatase 6 regulatory subunit 2 OS=Canis lupus familiaris GN=PPP6R2 PE=4 SV=1 - [J9NUX6_CANLF      | 2,17  | 1 | 1 | 1 | 1 |
| F1P657     | DNA nucleotidyltransferase OS=Canis lupus familiaris GN=DNTT PE=4 SV=2 - [F1P657_CANLF]                       | 2,16  | 1 | 1 | 1 | 2 |
| E2RAJ8     | Transient receptor potential cation channel subfamily M member 5 OS=Canis lupus familiaris GN=TRPM5 PE=3      | 2,14  | 1 | 1 | 1 | 1 |
| J9NSC8     | Nibrin OS=Canis lupus familiaris GN=BNB PE=4 SV=1 - [J9NSC8_CANLF]                                            | 2,09  | 1 | 0 | 1 | 1 |
| E2QXW0     | Sprouty related EVH1 domain containing 2 OS=Canis lupus familiaris GN=SPRED2 PE=4 SV=2 - [E2QXW0_CANLF        | 1,93  | 1 | 0 | 1 | 1 |
| P06625     | Signal recognition particle receptor subunit alpha OS=Canis lupus familiaris GN=SRPRA PE=2 SV=2 - [SRPRA_CA   | 1,88  | 1 | 0 | 1 | 2 |
| F1PLH3     | Signal recognition particle receptor subunit alpha OS=Canis lupus familiaris GN=SRPRA PE=4 SV=2 - [F1PLH3_C   | 1,88  | 1 | 0 | 1 | 2 |
| J9NTJ9     | Signal recognition particle receptor subunit alpha OS=Canis lupus familiaris GN=SRPRA PE=4 SV=1 - [J9NTJ9_CA  | 1,88  | 1 | 0 | 1 | 2 |
| J9NTJ6     | Anoctamin OS=Canis lupus familiaris GN=ANO2 PE=3 SV=1 - [J9NTJ6_CANLF]                                        | 1,87  | 1 | 0 | 1 | 1 |
| F1PST4     | Nibrin OS=Canis lupus familiaris GN=BNB PE=4 SV=2 - [F1PST4_CANLF]                                            | 1,86  | 1 | 0 | 1 | 1 |
| E2RBD2     | Polyamine modulated factor 1 binding protein 1 OS=Canis lupus familiaris GN=PMFBP1 PE=4 SV=2 - [E2RBD2_C      | 1,8   | 1 | 1 | 1 | 1 |
| F1P6F3     | Bromodomain testis associated OS=Canis lupus familiaris GN=BRDT PE=4 SV=2 - [F1P6F3_CANLF]                    | 1,78  | 1 | 1 | 1 | 1 |
| J9P3V0     | Uncharacterized protein OS=Canis lupus familiaris GN=RAPGEF6 PE=4 SV=1 - [J9P3V0_CANLF]                       | 1,74  | 1 | 0 | 1 | 3 |
| F1PK77     | Sperm associated antigen 9 OS=Canis lupus familiaris GN=SPAG9 PE=4 SV=2 - [F1PK77_CANLF]                      | 1,73  | 1 | 0 | 1 | 1 |
| J9P381     | Sperm associated antigen 9 OS=Canis lupus familiaris GN=SPAG9 PE=4 SV=1 - [J9P381_CANLF]                      | 1,73  | 1 | 0 | 1 | 1 |
| F1PKS8     | Anoctamin OS=Canis lupus familiaris GN=ANO2 PE=3 SV=2 - [F1PKS8_CANLF]                                        | 1,72  | 1 | 0 | 1 | 1 |
| J9NSU6     | Anoctamin OS=Canis lupus familiaris GN=ANO2 PE=3 SV=1 - [J9NSU6_CANLF]                                        | 1,71  | 1 | 0 | 1 | 1 |
| J9P788     | Signal recognition particle receptor subunit alpha OS=Canis lupus familiaris GN=SRPRA PE=4 SV=1 - [J9P788_CA  | 1,55  | 1 | 0 | 1 | 2 |
| F1PLH5     | ArfGAP with FG repeats 1 OS=Canis lupus familiaris GN=AGFG1 PE=4 SV=2 - [F1PLH5_CANLF]                        | 1,52  | 1 | 0 | 1 | 1 |
| F1Q0T0     | Golgin A3 OS=Canis lupus familiaris GN=GOLGA3 PE=4 SV=2 - [F1Q0T0_CANLF]                                      | 1,44  | 1 | 1 | 1 | 2 |
| E2RTD7     | RNA binding motif protein 44 OS=Canis lupus familiaris GN=RBM44 PE=4 SV=2 - [E2RTD7_CANLF]                    | 1,33  | 1 | 0 | 1 | 1 |
| J9P3Y2     | RNA binding motif protein 44 OS=Canis lupus familiaris GN=RBM44 PE=4 SV=1 - [J9P3Y2_CANLF]                    | 1,33  | 1 | 0 | 1 | 1 |
| F1PHZ2     | Triacylglycerol lipase OS=Canis lupus familiaris GN=PNLIPRP2 PE=3 SV=2 - [F1PHZ2_CANLF]                       | 1,28  | 1 | 1 | 1 | 2 |
| F6XGB4     | Growth regulation by estrogen in breast cancer 1 OS=Canis lupus familiaris GN=GREB1 PE=4 SV=1 - [F6XGB4_C     | 1,23  | 1 | 0 | 1 | 1 |
| J9P6D5     | Growth regulation by estrogen in breast cancer 1 OS=Canis lupus familiaris GN=GREB1 PE=4 SV=1 - [J9P6D5_C/    | 1,23  | 1 | 0 | 1 | 1 |
| E2RNM4     | ArfGAP with FG repeats 1 OS=Canis lupus familiaris GN=AGFG1 PE=4 SV=2 - [E2RNM4_CANLF]                        | 1,23  | 1 | 0 | 1 | 1 |
| E2R4E8     | Ankyrin repeat domain 11 OS=Canis lupus familiaris GN=ANKRD11 PE=4 SV=2 - [E2R4E8_CANLF]                      | 1,23  | 1 | 0 | 1 | 1 |
| E2RHN9     | Testis and ovary specific PAZ domain containing 1 OS=Canis lupus familiaris GN=TOPAZ1 PE=4 SV=2 - [E2RHN9_    | 1,22  | 1 | 0 | 1 | 2 |
| F1PDY3     | SH3 and PX domains 2B OS=Canis lupus familiaris GN=SH3PXD2B PE=4 SV=2 - [F1PDY3_CANLF]                        | 1,22  | 1 | 1 | 1 | 5 |
| J9PAS0     | Ankyrin repeat domain 11 OS=Canis lupus familiaris GN=ANKRD11 PE=4 SV=1 - [J9PAS0_CANLF]                      | 1,21  | 1 | 0 | 1 | 1 |
| J9NXS3     | Testis and ovary specific PAZ domain containing 1 OS=Canis lupus familiaris GN=TOPAZ1 PE=4 SV=1 - [J9NXS3_    | 1,16  | 1 | 0 | 1 | 2 |
| E2RFC3     | Cullin associated and neddylation dissociated 2 (putative) OS=Canis lupus familiaris GN=CAND2 PE=4 SV=2 - [E/ | 1,16  | 1 | 1 | 1 | 1 |
| J9P1Y0     | Testis and ovary specific PAZ domain containing 1 OS=Canis lupus familiaris GN=TOPAZ1 PE=4 SV=1 - [J9P1Y0_C   | 1,15  | 1 | 0 | 1 | 2 |
| E2RCW0     | Transferrin receptor 2 OS=Canis lupus familiaris GN=TFR2 PE=4 SV=2 - [E2RCW0_CANLF]                           | 1,12  | 1 | 1 | 1 | 1 |
| F1PD39     | Collagen type XI alpha 1 chain OS=Canis lupus familiaris GN=COL11A1 PE=4 SV=2 - [F1PD39_CANLF]                | 1,09  | 1 | 0 | 1 | 1 |
| F1PK99     | ATPase copper transporting alpha OS=Canis lupus familiaris GN=ATP7A PE=3 SV=2 - [F1PK99_CANLF]                | 1     | 1 | 1 | 1 | 3 |
| F1PD36     | Collagen type XI alpha 1 chain OS=Canis lupus familiaris GN=COL11A1 PE=4 SV=2 - [F1PD36_CANLF]                | 1     | 1 | 0 | 1 | 1 |
| J9NYK4     | Collagen type XI alpha 1 chain OS=Canis lupus familiaris GN=COL11A1 PE=4 SV=1 - [J9NYK4_CANLF]                | 1     | 1 | 0 | 1 | 1 |
| A0A0E3ZRD1 | DNA-directed RNA polymerase subunit beta' OS=Pasteurella multocida subsp. multocida OH4807 GN=rpoC PE=        | 0,99  | 1 | 1 | 1 | 3 |
| F6XRM5     | Aminopeptidase OS=Canis lupus familiaris GN=ENPEP PE=3 SV=1 - [F6XRM5_CANLF]                                  | 0,94  | 1 | 1 | 1 | 1 |
| E2RC04     | Kinetochore scaffold 1 OS=Canis lupus familiaris GN=KNL1 PE=4 SV=2 - [E2RC04_CANLF]                           | 0,88  | 1 | 1 | 1 | 1 |
| F1Q422     | Uncharacterized protein OS=Canis lupus familiaris GN=RAPGEF6 PE=4 SV=2 - [F1Q422_CANLF]                       | 0,87  | 1 | 0 | 1 | 3 |
| L7N0S1     | Uncharacterized protein OS=Canis lupus familiaris GN=RAPGEF6 PE=4 SV=1 - [L7N0S1_CANLF]                       | 0,87  | 1 | 0 | 1 | 3 |
| P83509     | Rho GTPase-activating protein 35 OS=Canis lupus familiaris GN=ARHGAP35 PE=2 SV=1 - [RHG35_CANLF]              | 0,87  | 1 | 0 | 1 | 1 |

|            |                                                                                                                                         |       |   |   |   |   |
|------------|-----------------------------------------------------------------------------------------------------------------------------------------|-------|---|---|---|---|
| E2RK70     | RPGRIP1 like OS=Canis lupus familiaris GN=RPGRIP1L PE=4 SV=2 - [E2RK70_CANLF]                                                           | 0,86  | 1 | 0 | 1 | 1 |
| J9NUY1     | Rho GTPase-activating protein 35 OS=Canis lupus familiaris GN=ARHGAP35 PE=4 SV=1 - [J9NUY1_CANLF]                                       | 0,86  | 1 | 0 | 1 | 1 |
| J9P705     | RPGRIP1 like OS=Canis lupus familiaris GN=RPGRIP1L PE=4 SV=1 - [J9P705_CANLF]                                                           | 0,84  | 1 | 0 | 1 | 1 |
| J9P4D0     | Pericentrin OS=Canis lupus familiaris GN=PCNT PE=4 SV=1 - [J9P4D0_CANLF]                                                                | 0,73  | 1 | 0 | 1 | 1 |
| E2RJS8     | Transformation/transcription domain associated protein OS=Canis lupus familiaris GN=TRRAP PE=3 SV=2 - [E2RJS8_CANLF]                    | 0,57  | 1 | 0 | 1 | 1 |
| J9NV05     | Transformation/transcription domain associated protein OS=Canis lupus familiaris GN=TRRAP PE=3 SV=1 - [J9NV05_CANLF]                    | 0,57  | 1 | 0 | 1 | 1 |
| E2RDZ3     | Adenylate cyclase 10, soluble OS=Canis lupus familiaris GN=ADCY10 PE=4 SV=1 - [E2RDZ3_CANLF]                                            | 0,37  | 1 | 0 | 1 | 1 |
| J9NU79     | Pericentrin OS=Canis lupus familiaris GN=PCNT PE=4 SV=1 - [J9NU79_CANLF]                                                                | 0,35  | 1 | 0 | 1 | 1 |
| J9P3H9     | MAP3K7 C-terminal like OS=Canis lupus familiaris GN=MAP3K7CL PE=4 SV=1 - [J9P3H9_CANLF]                                                 | 10,95 | 1 | 1 | 1 | 1 |
| J9NZ55     | Nicotinate-nucleotide pyrophosphorylase [carboxylating] OS=Canis lupus familiaris GN=QPRT PE=3 SV=1 - [J9NZ55_CANLF]                    | 7,36  | 1 | 1 | 1 | 1 |
| J9NW76     | NOP2/Sun RNA methyltransferase family member 3 OS=Canis lupus familiaris GN=NSUN3 PE=3 SV=1 - [J9NW76_CANLF]                            | 7,09  | 1 | 0 | 1 | 1 |
| E2R7X5     | POU domain protein OS=Canis lupus familiaris GN=POU4F2 PE=3 SV=1 - [E2R7X5_CANLF]                                                       | 6,13  | 1 | 0 | 1 | 2 |
| E2QST0     | NOP2/Sun RNA methyltransferase family member 3 OS=Canis lupus familiaris GN=NSUN3 PE=3 SV=1 - [E2QST0_CANLF]                            | 5,39  | 1 | 0 | 1 | 1 |
| A0A0E3V328 | Carboxy-S-adenosyl-L-methionine synthase OS=Pasteurella multocida subsp. multocida OH4807 GN=cmoA PE=3 SV=1 - [A0A0E3V328_CANLF]        | 5,39  | 1 | 1 | 1 | 1 |
| J9PA83     | S-(hydroxymethyl)glutathione dehydrogenase OS=Canis lupus familiaris GN=MEF2D PE=4 SV=1 - [J9PA83_CANLF]                                | 5,35  | 1 | 0 | 1 | 1 |
| A0A0E3ZQB8 | Tyrosine--tRNA ligase OS=Pasteurella multocida subsp. multocida OH4807 GN=tyrS PE=3 SV=1 - [A0A0E3ZQB8_CANLF]                           | 5,32  | 1 | 1 | 1 | 1 |
| F1PLM5     | S-(hydroxymethyl)glutathione dehydrogenase OS=Canis lupus familiaris GN=MEF2D PE=4 SV=2 - [F1PLM5_CANLF]                                | 5,32  | 1 | 0 | 1 | 1 |
| A0A0E3ZSD2 | Exopolyphosphatase OS=Pasteurella multocida subsp. multocida OH4807 GN=I926_07800 PE=3 SV=1 - [A0A0E3ZSD2_CANLF]                        | 4,65  | 1 | 1 | 1 | 1 |
| J9P151     | Myocyte enhancer factor 2D OS=Canis lupus familiaris GN=MEF2D PE=4 SV=1 - [J9P151_CANLF]                                                | 4,59  | 1 | 0 | 1 | 1 |
| F1PG05     | Collagen type II alpha 1 chain OS=Canis lupus familiaris GN=COL2A1 PE=4 SV=2 - [F1PG05_CANLF]                                           | 4,44  | 1 | 0 | 1 | 1 |
| F1PDZ9     | Myocyte enhancer factor 2D OS=Canis lupus familiaris GN=MEF2D PE=4 SV=2 - [F1PDZ9_CANLF]                                                | 4,42  | 1 | 0 | 1 | 1 |
| E2RPL0     | TNF alpha induced protein 2 OS=Canis lupus familiaris GN=TNFAIP2 PE=4 SV=2 - [E2RPL0_CANLF]                                             | 4,17  | 1 | 1 | 1 | 1 |
| E2RSB1     | Kelch like family member 30 OS=Canis lupus familiaris GN=KHLH30 PE=4 SV=1 - [E2RSB1_CANLF]                                              | 3,8   | 1 | 1 | 1 | 1 |
| F1PBW1     | Septin 10 OS=Canis lupus familiaris GN=SEPT10 PE=3 SV=2 - [F1PBW1_CANLF]                                                                | 3,41  | 1 | 0 | 1 | 1 |
| J9NU13     | Septin 10 OS=Canis lupus familiaris GN=SEPT10 PE=3 SV=1 - [J9NU13_CANLF]                                                                | 3,16  | 1 | 0 | 1 | 1 |
| A0A0E3V3F7 | Long-chain-fatty-acid--CoA ligase OS=Pasteurella multocida subsp. multocida OH4807 GN=I926_01245 PE=4 SV=1 - [A0A0E3V3F7_CANLF]         | 3,02  | 1 | 1 | 1 | 1 |
| F1Q411     | Pentatricopeptide repeat domain 3 OS=Canis lupus familiaris GN=PTCD3 PE=4 SV=2 - [F1Q411_CANLF]                                         | 2,77  | 1 | 1 | 1 | 3 |
| E2RM17     | TAO kinase 3 OS=Canis lupus familiaris GN=TAOK3 PE=4 SV=2 - [E2RM17_CANLF]                                                              | 2,67  | 1 | 1 | 1 | 1 |
| E2RJ90     | Uncharacterized protein OS=Canis lupus familiaris GN=LOC100855970 PE=4 SV=2 - [E2RJ90_CANLF]                                            | 2,62  | 1 | 1 | 1 | 1 |
| F1P6Z3     | N-ethylmaleimide sensitive factor, vesicle fusing ATPase OS=Canis lupus familiaris GN=NSF PE=4 SV=1 - [F1P6Z3_CANLF]                    | 2,42  | 1 | 0 | 1 | 1 |
| E2REM4     | Rho GTPase activating protein 17 OS=Canis lupus familiaris GN=ARHGAP17 PE=4 SV=2 - [E2REM4_CANLF]                                       | 2,4   | 1 | 1 | 1 | 1 |
| E2RDR5     | Glucosaminyl (N-acetyl) transferase 2, l-branching enzyme (I blood group) OS=Canis lupus familiaris GN=GCNT2 PE=4 SV=1 - [E2RDR5_CANLF] | 2,23  | 1 | 0 | 1 | 1 |
| E2RFV4     | N-ethylmaleimide sensitive factor, vesicle fusing ATPase OS=Canis lupus familiaris GN=NSF PE=4 SV=2 - [E2RFV4_CANLF]                    | 2,22  | 1 | 1 | 1 | 1 |
| E2RAH7     | Kinesin-like protein OS=Canis lupus familiaris GN=KIF18A PE=3 SV=1 - [E2RAH7_CANLF]                                                     | 2,22  | 1 | 1 | 1 | 1 |
| F1P7R9     | RNA binding motif protein 26 OS=Canis lupus familiaris GN=RBM26 PE=4 SV=2 - [F1P7R9_CANLF]                                              | 1,84  | 1 | 0 | 1 | 1 |
| J9NRX5     | RNA binding motif protein 26 OS=Canis lupus familiaris GN=RBM26 PE=4 SV=1 - [J9NRX5_CANLF]                                              | 1,79  | 1 | 0 | 1 | 1 |
| O71024     | Outer capsid protein VP2 OS=African horse sickness virus 6 GN=VP2 PE=2 SV=1 - [O71024_AHSV6]                                            | 1,71  | 1 | 0 | 1 | 1 |
| A0A189RMP8 | Major outer capsid protein OS=African horse sickness virus 6 GN=VP2 PE=4 SV=1 - [A0A189RMP8_AHSV6]                                      | 1,71  | 1 | 0 | 1 | 1 |
| A0A189RMP2 | Major outer capsid protein OS=African horse sickness virus 6 GN=VP2 PE=4 SV=1 - [A0A189RMP2_AHSV6]                                      | 1,71  | 1 | 0 | 1 | 1 |
| A0A189RMR5 | Major outer capsid protein OS=African horse sickness virus 6 GN=VP2 PE=4 SV=1 - [A0A189RMR5_AHSV6]                                      | 1,71  | 1 | 0 | 1 | 1 |
| A0A189RMR4 | Major outer capsid protein OS=African horse sickness virus 6 GN=VP2 PE=4 SV=1 - [A0A189RMR4_AHSV6]                                      | 1,71  | 1 | 0 | 1 | 1 |
| A0A189RMS5 | Major outer capsid protein OS=African horse sickness virus 6 GN=VP2 PE=4 SV=1 - [A0A189RMS5_AHSV6]                                      | 1,71  | 1 | 0 | 1 | 1 |
| A0A0U2DD05 | VP2 OS=African horse sickness virus 6 GN=VP2 PE=4 SV=1 - [A0A0U2DD05_AHSV6]                                                             | 1,71  | 1 | 0 | 1 | 1 |
| A0A189RMS0 | Major outer capsid protein OS=African horse sickness virus 6 GN=VP2 PE=4 SV=1 - [A0A189RMS0_AHSV6]                                      | 1,71  | 1 | 0 | 1 | 1 |
| A0A0N9LCS2 | VP2 OS=African horse sickness virus 6 GN=VP2 PE=4 SV=1 - [A0A0N9LCS2_AHSV6]                                                             | 1,71  | 1 | 0 | 1 | 1 |
| A0A189RMQ3 | Major outer capsid protein OS=African horse sickness virus 6 GN=VP2 PE=4 SV=1 - [A0A189RMQ3_AHSV6]                                      | 1,71  | 1 | 0 | 1 | 1 |
| A0A189RMT4 | Major outer capsid protein OS=African horse sickness virus 6 GN=VP2 PE=4 SV=1 - [A0A189RMT4_AHSV6]                                      | 1,71  | 1 | 0 | 1 | 1 |
| A0A0U2DGT5 | VP2 OS=African horse sickness virus 6 GN=VP2 PE=4 SV=1 - [A0A0U2DGT5_AHSV6]                                                             | 1,71  | 1 | 0 | 1 | 1 |
| A0A0K0POG2 | VP2 OS=African horse sickness virus 6 GN=VP2 PE=4 SV=1 - [A0A0K0POG2_AHSV6]                                                             | 1,71  | 1 | 0 | 1 | 1 |
| A0A0U1XN26 | Outer capsid protein OS=African horse sickness virus 6 GN=VP2 PE=4 SV=1 - [A0A0U1XN26_AHSV6]                                            | 1,71  | 1 | 0 | 1 | 1 |
| F1PS24     | Collagen type II alpha 1 chain OS=Canis lupus familiaris GN=COL2A1 PE=4 SV=1 - [F1PS24_CANLF]                                           | 1,48  | 1 | 0 | 1 | 1 |
| O77753     | Type IIA procollagen OS=Canis lupus familiaris GN=COL2A1 PE=4 SV=2 - [O77753_CANLF]                                                     | 1,48  | 1 | 0 | 1 | 1 |
| J9NYX0     | DENN domain containing 4A OS=Canis lupus familiaris GN=DENND4A PE=4 SV=1 - [J9NYX0_CANLF]                                               | 1,39  | 1 | 0 | 1 | 1 |
| E2RRL1     | DENN domain containing 4A OS=Canis lupus familiaris GN=DENND4A PE=4 SV=1 - [E2RRL1_CANLF]                                               | 1,18  | 1 | 0 | 1 | 1 |
| J9P4F8     | DENN domain containing 4A OS=Canis lupus familiaris GN=DENND4A PE=4 SV=1 - [J9P4F8_CANLF]                                               | 1,15  | 1 | 0 | 1 | 1 |
| E2R4V6     | Nucleoporin 98 OS=Canis lupus familiaris GN=NUP98 PE=4 SV=2 - [E2R4V6_CANLF]                                                            | 1,06  | 1 | 1 | 1 | 1 |

**Table S4: Mass spectrometric identified biomarker candidates**

Mean ratios of AM/NM and CF/NF as well as number hits that determine an altered protein as BM candidate. Calculation of mean ratios, cf. Formula 1 in Supplementary Methods. The number of hits corresponds to protein concentration in sub-fractions included. Here all results are given, proteins and protein clusters higher as well as lower in affected animals.

"1000" was set for an extraordinary high ratio, even when much higher, in order to apply value depending color code of Excel.

"DIV/0": division by zero, the ratio cannot be calculated since there was no hit/peptide in the control sample. Figure 2 (main document) represent an excerpt from this table.

**Altered proteins in dogs (7. wk)**

| ID                            | Annotation                                                            | Males              |       |                |        |               | Females            |       |                |      |               |  |
|-------------------------------|-----------------------------------------------------------------------|--------------------|-------|----------------|--------|---------------|--------------------|-------|----------------|------|---------------|--|
|                               |                                                                       | in sub-fractions   |       |                |        | overall trend | in sub-fractions   |       |                |      | overall trend |  |
|                               |                                                                       | Mean ratio (AM/NM) |       | Number of hits |        |               | Mean ratio (CF/NF) |       | Number of hits |      |               |  |
| higher                        | lower                                                                 | higher             | lower | in AM          | higher | lower         | higher             | lower | in CF          |      |               |  |
| <b>Plasma proteins</b>        |                                                                       |                    |       |                |        |               |                    |       |                |      |               |  |
| F1PNV5                        | <b>Kallikrein B1</b>                                                  | 1000               | 0,245 | 15             | 32     | 114,84        | 0                  | 0,158 | 0              | 39   | 0,00          |  |
| E2R886                        | <b>Kininogen 1</b>                                                    | 56,2               | 0,043 | 523            | 609    | 2,08          | 20,3               | 0,227 | 106            | 361  | 1,35          |  |
| E2QUV3                        | <b>α2-HS glycoprotein</b>                                             | 326                | 0,15  | 1056           | 3178   | 16,25         | n.a.               |       |                |      |               |  |
| F1P6E1                        | <b>Complement C1s</b>                                                 | 0                  | 0,041 | 0              | 153    | 0,00          | 3,11               | 0     | 67             | 0    | #DIV/0!       |  |
| F1PNG7                        | <b>Complement C1r</b>                                                 | n.a.               |       |                |        |               | 115                | 0,105 | 24             | 29   | 9,99          |  |
| J9P4B4                        | <b>Complement C1q A chain</b>                                         | 1000               | 0,133 | 14             | 53     | 35,13         | n.f.               |       |                |      |               |  |
| J9P1G2                        | <b>Complement C1q B chain</b>                                         | 1000               | 0,229 | 60             | 128    | 107,34        | 4,09               | 0,155 | 22             | 85   | 0,16          |  |
| E2RJJC2                       | <b>Complement C1q C chain</b>                                         | 1000               | 0,078 | 90             | 89     | 78,88         | 3,21               | 0,062 | 17             | 51   | 0,07          |  |
| E2RS79                        | <b>Complement C2 (human homolog)</b>                                  | 3,44               | 0,026 | 21             | 14     | 0,13          | 0                  | 0,14  | 0              | 14   | 0,00          |  |
| F1PIX8                        | <b>Complement C3</b>                                                  | 32,2               | 0,086 | 4565           | 27225  | 0,46          | 34,77              | 0,102 | 2165           | 4973 | 1,54          |  |
| J9PAD1                        | <b>Complement C4 (human homolog)</b>                                  | 29,6               | 0,057 | 509            | 3883   | 0,22          | 150                | 0,107 | 125            | 2148 | 0,93          |  |
| F1PWR2                        | <b>Complement C4 (human homolog)</b>                                  | 6,09               | 0,077 | 316            | 759    | 0,20          | 37,3               | 0,094 | 84             | 615  | 0,48          |  |
| F1P7J4                        | <b>Complement C5</b>                                                  | 21,3               | 0,04  | 68             | 467    | 0,12          | 14,9               | 0,154 | 17             | 311  | 0,13          |  |
| E2RG76                        | <b>Complement C6</b>                                                  | 1000               | 0,025 | 177            | 127    | 34,84         | 0                  | 0,089 | 0              | 123  | 0,00          |  |
| E2RG01                        | <b>Complement C7</b>                                                  | 1000               | 0,157 | 56             | 257    | 34,21         | 0                  | 0,225 | 0              | 82   | 0,00          |  |
| E2R109                        | <b>Complement C8 alpha chain</b>                                      | 1000               | 0,143 | 14             | 45     | 44,49         | 2,26               | 0,011 | 1              | 10   | 0,00          |  |
| E2R141                        | <b>Complement C8 beta chain</b>                                       | 2,41               | 0,197 | 4              | 76     | 0,02          | n.a.               |       |                |      |               |  |
| J9P8Z6                        | <b>Complement C9</b>                                                  | 5,79               | 0     | 8              | 0      | #DIV/0!       | n.a.               |       |                |      |               |  |
| F1PY40                        | <b>Complement factor I</b>                                            | 66,2               | 0,164 | 48             | 462    | 1,13          | 49,5               | 0,065 | 30             | 161  | 0,60          |  |
| J9NTL7                        | <b>Complement factor H (homolog in mammals)</b>                       | 69,5               | 0,086 | 162            | 2069   | 0,47          | 47,6               | 0,057 | 87             | 2884 | 0,08          |  |
| E2RS80                        | <b>Complement factor B (homolog in primates)</b>                      | 39                 | 0,078 | 452            | 1516   | 0,91          | 25                 | 0,156 | 57             | 762  | 0,29          |  |
| F1PGM9                        | <b>Complement component 4 binding protein alpha</b>                   | 170,4              | 0,17  | 1105           | 2308   | 13,87         | 20,2               | 0,11  | 279            | 1332 | 0,47          |  |
| G1K2D9                        | <b>Haptoglobin</b>                                                    | 114                | 0,07  | 1849           | 3024   | 4,88          | 0                  | 0,127 | 0              | 5882 | 0,00          |  |
| F6LME0                        | <b>α2-macroglobulin</b>                                               | 77,55              | 0,093 | 2383           | 6931   | 2,48          | 179                | 0,087 | 277            | 3986 | 1,08          |  |
| F6Y713                        | <b>α1-acid glycoprotein</b>                                           | 23                 | 0,182 | 816            | 367    | 9,31          | 13,6               | 0,253 | 29             | 1467 | 0,07          |  |
| P33703                        | <b>APOH, Beta-2-glycoprotein 1</b>                                    | 42,2               | 0,177 | 293            | 582    | 3,76          | 15,7               | 0,077 | 112            | 328  | 0,41          |  |
| T2KEN6                        | <b>Pentraxin</b>                                                      | 3,53               | 0,006 | 117            | 41     | 0,06          | 0                  | 0,307 | 0              | 174  | 0,00          |  |
| A1LLJ0                        | <b>Alpha-1-antitrypsin</b>                                            | 6,2                | 0,076 | 147            | 52     | 1,33          | 4,08               | 0,186 | 24             | 175  | 0,10          |  |
| F1PAX2                        | <b>Ceruloplasmin</b>                                                  | 4,38               | 0,055 | 363            | 1283   | 0,07          | 6,28               | 0,159 | 49             | 688  | 0,07          |  |
| F1PCE5                        | <b>Serpin family A member 1</b>                                       | 114                | 0,151 | 396            | 1353   | 5,04          | 53,1               | 0,18  | 378            | 1233 | 2,93          |  |
| F1PH86                        | <b>Serpin family A member 3</b>                                       | n.f.               |       |                |        |               | 2,4                | 0,298 | 17             | 107  | 0,11          |  |
| E2RMF9                        | <b>Serpin family A member 5</b>                                       | 0                  | 0,164 | 0              | 39     | 0,00          | 34                 | 0,195 | 4              | 20   | 1,33          |  |
| F1PB85                        | <b>Serpin family A member 7</b>                                       | 8,55               | 0,319 | 20             | 22     | 2,48          | 0                  | 0,245 | 0              | 23   | 0,00          |  |
| F1PYX9                        | <b>Serpin family G member 1</b>                                       | 11,3               | 0,064 | 183            | 944    | 0,14          | 12,9               | 0,13  | 24             | 499  | 0,08          |  |
| J9P8Q8                        | <b>Serpin family D member 1</b>                                       | 2,17               | 0,233 | 12             | 245    | 0,02          | 2,53               | 0,334 | 29             | 86   | 0,28          |  |
| J9NS57                        | <b>Leucine rich alpha-2-glycoprotein 1</b>                            | 2,2                | 0,275 | 289            | 133    | 13,15         | 10,6               | 0,208 | 68             | 348  | 0,43          |  |
| J9NVF9                        | <b>Serum amyloid A</b>                                                | 86,4               | 0     | 70             | 0      | #DIV/0!       | 0                  | 0,148 | 0              | 275  | 0,00          |  |
| F1PAL5                        | <b>Angiotensinogen</b>                                                | 19,4               | 0,289 | 48             | 75     | 3,59          | 6,4                | 0,186 | 28             | 40   | 0,83          |  |
| Q7M310                        | <b>Angiotensin I</b>                                                  | 2,84               | 0,277 | 69             | 38     | 1,43          | n.f.               |       |                |      |               |  |
| F1PN98                        | <b>Coagulation factor V</b>                                           | 3,35               | 0     | 107            | 0      | #DIV/0!       | 0                  | 0,007 | 0              | 33   | 0,00          |  |
| J9NSF9                        | <b>Prothrombin</b>                                                    | 51                 | 0,17  | 292            | 797    | 3,18          | 11,9               | 0,214 | 35             | 350  | 0,25          |  |
| F1PZR4                        | <b>Hemopexin</b>                                                      | 44,9               | 0,136 | 83             | 563    | 0,90          | 68,7               | 0,166 | 144            | 1162 | 1,41          |  |
| F1Q421                        | <b>Plasminogen</b>                                                    | n.a.               |       |                |        |               | 52,6               | 0,251 | 97             | 403  | 3,18          |  |
| J9P430                        | <b>Transferrin</b>                                                    | 20,4               | 0,123 | 1424           | 6332   | 0,56          | 29,1               | 0,142 | 191            | 4721 | 0,17          |  |
| F6V1W9                        | <b>Transferrin</b>                                                    | 4,12               | 0,335 | 11             | 5      | 3,04          | 3,95               | 0,23  | 3              | 3    | 0,91          |  |
| J9LHX7                        | <b>Serotransferrin (homolog, several species)</b>                     | 9,23               | 0,344 | 355            | 776    | 1,45          | 20,2               | 0,208 | 102            | 477  | 0,90          |  |
| E2OZQ1                        | <b>Serotransferrin (homolog, several species)</b>                     | 6,75               | 0,256 | 17             | 55     | 0,53          | 1000               | 0,09  | 9              | 20   | 40,50         |  |
| F1PKX3                        | <b>Coagulation factor XIII A chain</b>                                | 2,76               | 0,103 | 6              | 83     | 0,02          | 41,2               | 0,401 | 8              | 3    | 44,06         |  |
| F1Q041                        | <b>Coagulation factor XIII B chain</b>                                | 1000               | 0,025 | 6              | 38     | 3,95          | 1000               | 0,068 | 6              | 19   | 21,47         |  |
| F1PSS8                        | <b>Protein S</b>                                                      | 2,98               | 0,125 | 26             | 170    | 0,06          | 0                  | 0,174 | 0              | 121  | 0,00          |  |
| F1Q4A3                        | <b>Coagulation factor X</b>                                           | 0                  | 0,236 | 0              | 25     | 0,00          | 20,5               | 0,013 | 18             | 2    | 2,40          |  |
| E2R4E7                        | <b>Afamin</b>                                                         | 6,76               | 0,318 | 297            | 1075   | 0,59          | 14                 | 0,268 | 37             | 604  | 0,23          |  |
| F6Y3P9                        | <b>Gelsolin</b>                                                       | 34,5               | 0,259 | 218            | 529    | 3,68          | 20                 | 0,23  | 91             | 114  | 3,67          |  |
| E2R5U8                        | <b>Transthyretin</b>                                                  | 8,76               | 0,218 | 65             | 1143   | 0,11          | n.a.               |       |                |      |               |  |
| A0A1K0FUG                     | <b>Globin A1</b>                                                      | 109                | 0,103 | 229            | 60     | 42,85         | 1000               | 0,01  | 21             | 32   | 6,56          |  |
| A0A1K0GGH                     | <b>Globin A2</b>                                                      | 103                | 0,047 | 118            | 34     | 16,80         | 0                  | 0,157 | 0              | 42   | 0,00          |  |
| J9NXL3                        | <b>Hemoglobin subunit alpha (dog homolog)</b>                         | 115                | 0,101 | 155            | 52     | 34,62         | 2,8                | 0,11  | 2              | 101  | 0,01          |  |
| E2R9B6                        | <b>Fetuin B</b>                                                       | 30,4               | 0,221 | 148            | 212    | 4,69          | 2                  | 0,24  | 16             | 228  | 0,03          |  |
| F1PYM4                        | <b>Insulin like growth factor binding protein acid labile subunit</b> | 31                 | 0,258 | 15             | 147    | 0,82          | 3,15               | 0,24  | 21             | 10   | 1,59          |  |
| B5U1S6                        | <b>Adiponectin (fragment)</b>                                         | 1000               | 0,132 | 22             | 56     | 51,86         | 1000               | 0,004 | 14             | 29   | 1,93          |  |
| F1PDJ7                        | <b>Alpha-2-glycoprotein 1</b>                                         | 3,75               | 0,292 | 20             | 11     | 1,99          | n.a.               |       |                |      |               |  |
| E2RPW3                        | <b>Paraoxonase 1</b>                                                  | 3,55               | 0,018 | 33             | 28     | 0,08          | 1000               | 0,047 | 45             | 8    | 264,38        |  |
| J9P8B0                        | <b>Dipeptidyl peptidase 4</b>                                         | 2,31               | 0     | 10             | 0      | #DIV/0!       | n.a.               |       |                |      |               |  |
| F1PCK2                        | <b>α1-B glycoprotein</b>                                              | 21,9               | 0,02  | 714            | 469    | 0,67          | 25,2               | 0,127 | 978            | 1688 | 1,85          |  |
| F1Q4D9                        | <b>Retinol binding protein 4</b>                                      | 8,97               | 0,18  | 12             | 98     | 0,20          | 25,06              | 0,304 | 13             | 20   | 4,95          |  |
| E2RPB8                        | <b>C-type lectin domain family 3 member B</b>                         | n.a.               |       |                |        |               | 2,59               | 0,279 | 11             | 134  | 0,06          |  |
| E2RQK6                        | <b>Galectin 3 binding protein</b>                                     | 2,24               | 0,253 | 18             | 6      | 1,70          | 3,3                | 0,067 | 24             | 64   | 0,08          |  |
| <b>Apolipoproteins</b>        |                                                                       |                    |       |                |        |               |                    |       |                |      |               |  |
| J9P843                        | <b>Apo AI</b>                                                         | 325                | 0,16  | 4231           | 17259  | 12,75         | 41,1               | 0,061 | 325            | 1356 | 0,60          |  |
| E2RE76                        | <b>Apo AIV</b>                                                        | 6,76               | 0,115 | 324            | 574    | 0,44          | 21,5               | 0,21  | 164            | 146  | 5,07          |  |
| P56595                        | <b>Apo CI</b>                                                         | 4,72               | 0,206 | 8              | 147    | 0,05          | 3,97               | 0     | 14             | 6    | #DIV/0!       |  |
| 9NWJ6                         | <b>Apo CII</b>                                                        | 15,8               | 0,153 | 58             | 770    | 0,18          | 50,3               | 0,274 | 33             | 35   | 12,99         |  |
| D5G334                        | <b>Apo E4 (fragment)</b>                                              | 4,8                | 0,162 | 44             | 212    | 0,16          | 37,4               | 0,233 | 55             | 116  | 4,13          |  |
| F1PJ74                        | <b>Apo E</b>                                                          | 15                 | 0,19  | 32             | 269    | 0,34          | 33                 | 0,279 | 34             | 107  | 2,93          |  |
| E2RQ71                        | <b>Apo M</b>                                                          | 6,86               | 0,278 | 22             | 458    | 0,09          | 2,57               | 0,401 | 26             | 23   | 1,16          |  |
| F1P8Z5                        | <b>Apo B</b>                                                          | 87                 | 0,124 | 470            | 7485   | 0,68          | 19,3               | 0,107 | 115            | 2837 | 0,08          |  |
| E2RNM1                        | <b>Apo D</b>                                                          | 11,7               | 0,16  | 44             | 111    | 0,74          | 108,2              | 0,124 | 61             | 27   | 30,31         |  |
| <b>Intracellular proteins</b> |                                                                       |                    |       |                |        |               |                    |       |                |      |               |  |
| F1PZK8                        | <b>Dynein heavy chain domain 1</b>                                    | 1000               | 0,175 | 24             | 23     | 182,61        | 3,24               | 0,416 | 3              | 3    | 1,35          |  |
| E2RB62                        | <b>Myosin IB</b>                                                      | 6,19               | 0,147 | 2              | 8      | 0,23          |                    |       |                |      |               |  |
| E2R1Q3                        | <b>Myosin XVIIIIB</b>                                                 | n.a.               |       |                |        |               | 3,02               | 0     | 5              | 0    | #DIV/0!       |  |
| J9P187                        | <b>Myosin IXA</b>                                                     | 894                | 0,202 | 94             | 257    | 66,05         | 328                | 0,278 | 51             | 60   | 77,51         |  |
| J9P007                        | <b>Kinesin-like protein</b>                                           | 3,43               | 0     | 8              | 0      | #DIV/0!       | 3,46               | 0,146 | 4              | 2    | 1,01          |  |
| F1PM26                        | <b>CD109 molecule</b>                                                 | 17,3               | 0,16  | 20             | 9      | 6,15          | n.f.               |       |                |      |               |  |
| J9P216                        | <b>Formin 1</b>                                                       | 1000               | 0,266 | 10             | 13     | 204,62        | 4,95               | 0     | 9              | 0    | #DIV/0!       |  |
| J9P7F7                        | <b>Ficolin 1</b>                                                      | 1000               | 0,123 | 7              | 38     | 22,66         | 4,1                | 0,017 | 23             | 13   | 0,12          |  |
| F1PAQ3                        | <b>Maltase-glucoamylase</b>                                           | 6,49               | 0,284 | 70             | 185    | 0,70          | 2,18               | 0,005 | 11             | 26   | 0,00          |  |
| J9P5V6                        | <b>Talin 1</b>                                                        | 17,6               | 0,158 | 3              | 7      | 1,19          | 128                | 0,247 | 1              | 4    | 7,90          |  |
| E2RFS6                        | <b>Sacsin molecular chaperone</b>                                     | 12                 | 0,418 | 4              | 7      | 2,87          | 12,7               | 0,333 | 3              | 5    | 2,54          |  |

|                                      |                                                                   |       |       |      |      |         |       |        |     |      |         |
|--------------------------------------|-------------------------------------------------------------------|-------|-------|------|------|---------|-------|--------|-----|------|---------|
| E2QV33                               | Mediator complex subunit 22 (RNA-Pol)                             | 98,4  | 0     | 26   | 0    | #DIV/0! | 0     | 0,097  | 0   | 28   | 0,00    |
| E2R926                               | Fukutin                                                           | 29,5  | 0,021 | 12   | 2    | 3,72    | n.f.  |        |     | 4    | 4,80    |
| E2RP26                               | Filamin C                                                         | 0     | 0,026 | 0    | 14   | 0,00    | n.f.  |        |     | 0    | #DIV/0! |
| E2RK65                               | Kelch like family member 8                                        | 7,84  | 0,04  | 10   | 4    | 0,78    | n.f.  |        |     | 0    | #DIV/0! |
| F1PRY8                               | Dispatched RND transporter family member 2                        | n.a.  |       |      |      | 1000    | 0     |        | 5   | 3    | #DIV/0! |
| F6Y1C9                               | DNA Polymerase                                                    | n.a.  |       |      |      | 4,14    | 0,232 |        | 20  | 4    | 4,80    |
| A0A0A0MPC1                           | Trafficking protein particle complex subunit 2                    | n.a.  |       |      |      | 1000    | 0     |        | 9   | 0    | #DIV/0! |
| J9P1C0                               | Microfibril associated protein 4                                  | n.a.  |       |      |      | 0       | 0,181 |        | 0   | 12   | 0,00    |
| J9P514                               | RB associated KRAB zinc finger                                    | 6,05  | 0,326 | 2    | 15   | 0,26    | 9,04  | 0      | 6   | 0    | #DIV/0! |
| J9P653                               | Ciliogenesis-associated TTC17-interacting protein (human homolog) | 10,1  | 0     | 10   | 0    | #DIV/0! | 2,9   | 0,396  | 2   | 14   | 0,16    |
| J9NYQ5                               | Growth arrest specific 2 like 3                                   | 6,17  | 0,33  | 4    | 2    | 4,07    | 11,5  | 0,437  | 7   | 1    | 35,18   |
| E2R1C3                               | Proteasome subunit alpha type                                     | 0     | 0,186 | 0    | 35   | 0,00    | 2,27  | 0,08   | 33  | 6    | 1,00    |
| J9NY53                               | Regulating synaptic membrane exocytosis 2                         | 2,18  | 0,367 | 5    | 4    | 1,00    | 0     | 0,276  | 0   | 5    | 0,00    |
| E2RF52                               | Proteasome subunit alpha type                                     | n.f.  |       |      |      |         | 171   | 0      | 7   | 0    | #DIV/0! |
| <b>Extracellular matrix proteins</b> |                                                                   |       |       |      |      |         |       |        |     |      |         |
| J9P8M2                               | Fibronectin                                                       | 28,9  | 0,164 | 386  | 3982 | 0,46    | 32,6  | 0,157  | 39  | 1842 | 0,11    |
| E2QTQ1-                              | Ankyrin repeat and BTB domain containing 1                        | 0     | 0,346 | 0    | 4    | 0,00    | 92    | 0,015  | 29  | 30   | 1,33    |
| J9NV47                               | Hyaluronan binding protein 2                                      | 31,6  | 0     | 82   | 0    | #DIV/0! | 2,18  | 0,116  | 4   | 5    | 0,20    |
| F1Q1K9                               | Hyaluronan binding protein 2                                      | 31,3  | 0     | 16   | 0    | #DIV/0! | n.a.  |        |     |      |         |
| F1Q315                               | Collagen α1(I) chain                                              | 2,87  | 0     | 74   | 0    | #DIV/0! | 0     | 0,197  | 0   | 136  | 0,00    |
| E5G723                               | Collagen α1 (I) (Fragment)                                        | 31,05 | 0,096 | 6    | 12   | 1,49    | 1000  | 0,106  | 13  | 10   | 137,80  |
| F1PHY1                               | Collagen α2 (I) chain                                             | 3,26  | 0,254 | 11   | 1    | 9,11    | 0     | 0,219  | 0   | 73   | 0,00    |
| F1PJH3                               | Collagen type XIII alpha 1 chain                                  | 455   | 0     | 36   | 0    | #DIV/0! | 0     | 0,235  | 0   | 36   | 0,00    |
| J9NRV7                               | Fibrinogen alpha chain                                            | 265   | 0,078 | 1394 | 2959 | 9,74    | 0     | 0,092  | 0   | 1970 | 0,00    |
| F1PW65                               | Fibrinogen beta chain                                             | 96,9  | 0,095 | 1600 | 4493 | 3,28    | 37,4  | 0,075  | 483 | 3248 | 0,42    |
| F1P8G0                               | Fibrinogen gamma chain                                            | 399   | 0,1   | 1683 | 3016 | 22,27   | 53,4  | 0,116  | 200 | 1983 | 0,62    |
| F1Q418                               | Inter-alpha-trypsin inhibitor heavy chain 1                       | 4,02  | 0,127 | 135  | 829  | 0,08    | 2,98  | 0,053  | 158 | 618  | 0,04    |
| F1PG39                               | Inter-alpha-trypsin inhibitor heavy chain 2                       | 3,09  | 0,1   | 142  | 716  | 0,06    | 42    | 0,094  | 38  | 554  | 0,27    |
| J9P713                               | Inter-alpha-trypsin inhibitor heavy chain 3                       | 0     | 0,139 | 0    | 484  | 0,00    | 25,7  | 0,076  | 81  | 115  | 1,38    |
| H9GWY3                               | Inter-alpha-trypsin inhibitor heavy chain 4                       | 59,9  | 0,157 | 423  | 2238 | 1,78    | 5,51  | 0,083  | 146 | 846  | 0,08    |
| J9NU16                               | Alpha-1-microglobulin/bikunin precursor                           | 33,6  | 0,055 | 27   | 252  | 0,20    | 75    | 0,053  | 36  | 115  | 1,24    |
| E2RQF8                               | Extracellular matrix protein 1 (human homolog)                    | 24,1  | 0,191 | 38   | 93   | 1,88    | 0     | 0,257  | 0   | 23   | 0,00    |
| J9P669                               | Cadherin 5                                                        | 3,3   | 0,141 | 19   | 29   | 0,30    | 5,54  | 0,262  | 4   | 4    | 1,45    |
| J9PAA4                               | Carboxypeptidase N subunit 2                                      | 5,81  | 0,141 | 97   | 110  | 0,72    | 177   | 0,038  | 4   | 142  | 0,19    |
| F1PLT8                               | Sulfhydryl oxidase                                                | 2,92  | 0     | 20   | 0    | #DIV/0! | 0     | 0,343  | 0   | 30   | 0,00    |
| J9P319                               | Osteomodulin                                                      | 0     | 0,13  | 0    | 29   | 0,00    | 2,9   | 0,216  | 12  | 18   | 0,42    |
| E2RJE0                               | Cartilage oligomeric matrix protein                               | 0     | 0,155 | 0    | 47   | 0,00    | 1000  | 0      | 3   | 0    | #DIV/0! |
| F1PV43                               | Capping actin protein of muscle Z-line alpha subunit 3            | 11,1  | 0     | 7    | 0    | #DIV/0! | n.f.  |        |     |      |         |
| F1Q1P0                               | Coiled-coil domain containing 178                                 | 39,7  | 0,213 | 19   | 7    | 22,95   | 17,2  | 0,116  | 14  | 2    | 13,97   |
| E2R416                               | Lumican                                                           | 44,5  | 0,15  | 36   | 114  | 2,11    | 11,9  | 0,051  | 58  | 118  | 0,30    |
| F6Y120                               | Serine/arginine repetitive matrix protein 3 (homolog)             | 20,90 | 0,38  | 14   | 12   | 9,22    | 3,78  | 0,142  | 10  | 12   | 0,45    |
| Q2YF02                               | Vitronectin (fragment),                                           | 68,7  | 0,303 | 45   | 64   | 14,64   | 2,38  | 0,11   | 15  | 9    | 0,44    |
| H2BF45                               | Attractin (fragment)                                              | n.a.  |       |      |      |         | 4,14  | 0,002  | 7   | 39   | 0,00    |
| F1Q117                               | Attractin                                                         | n.a.  |       |      |      |         | 2,75  | 0,0003 | 3   | 9    | 0,00    |

**Table S4: Mass spectrometric identified biomarker candidates**

Mean ratios of AM/NM and CF/NF as well as number hits that determine an altered protein as BM candidate. Calculation of mean ratios, cf. Formula 1 in Supplementary Methods. The number of hits corresponds to protein concentration in sub-fractions included. Here all results are given, proteins and protein clusters higher as well as lower in affected animals.

"1000" was set for an extraordinary high ratio, even when much higher, in order to apply value depending color code of Excel.

"DIV/0": division by zero, the ratio cannot be calculated since there was no hit/peptide in the control sample. Figure 2 (main document) represent an excerpt from this table.

| ID                            | Annotation                                                     | Males              |       |                |        |               | Females            |       |                |      |               |
|-------------------------------|----------------------------------------------------------------|--------------------|-------|----------------|--------|---------------|--------------------|-------|----------------|------|---------------|
|                               |                                                                | in sub-fractions   |       |                |        | overall trend | in sub-fractions   |       |                |      | overall trend |
|                               |                                                                | Mean ratio (AM/NM) |       | Number of hits |        |               | Mean ratio (CF/NF) |       | Number of hits |      |               |
| higher                        | lower                                                          | higher             | lower | in AM          | higher | lower         | higher             | lower | in CF          |      |               |
| <b>Plasma proteins</b>        |                                                                |                    |       |                |        |               |                    |       |                |      |               |
| F1PNV5                        | Kallikrein B1                                                  | 1000               | 0,245 | 15             | 32     | 114,84        | 0                  | 0,158 | 0              | 39   | 0,00          |
| E2R886                        | Kininogen 1                                                    | 56,2               | 0,043 | 523            | 609    | 2,08          | 20,3               | 0,227 | 106            | 361  | 1,35          |
| E2QUV3                        | α2-HS glycoprotein                                             | 326                | 0,15  | 1056           | 3178   | 16,25         | n.a.               |       |                |      |               |
| F1P6E1                        | Complement C1s                                                 | 0                  | 0,041 | 0              | 153    | 0,00          | 3,11               | 0     | 67             | 0    | #DIV/0!       |
| F1PNG7                        | Complement C1r                                                 | n.a.               |       |                |        |               | 115                | 0,105 | 24             | 29   | 9,99          |
| J9P4B4                        | Complement C1q A chain                                         | 1000               | 0,133 | 14             | 53     | 35,13         | n.f.               |       |                |      |               |
| J9P1G2                        | Complement C1q B chain                                         | 1000               | 0,229 | 60             | 128    | 107,34        | 4,09               | 0,155 | 22             | 85   | 0,16          |
| E2RJC2                        | Complement C1q C chain                                         | 1000               | 0,078 | 90             | 89     | 78,88         | 3,21               | 0,062 | 17             | 51   | 0,07          |
| E2RS79                        | Complement C2 (human homolog)                                  | 3,44               | 0,026 | 21             | 14     | 0,13          | 0                  | 0,14  | 0              | 14   | 0,00          |
| F1PIX8                        | Complement C3                                                  | 32,2               | 0,086 | 4565           | 27225  | 0,46          | 34,77              | 0,102 | 2165           | 4973 | 1,54          |
| J9PAD1                        | Complement C4 (human homolog)                                  | 29,6               | 0,057 | 509            | 3883   | 0,22          | 150                | 0,107 | 125            | 2148 | 0,93          |
| F1PWR2                        | Complement C4 (human homolog)                                  | 6,09               | 0,077 | 316            | 759    | 0,20          | 37,3               | 0,094 | 84             | 615  | 0,48          |
| F1P7J4                        | Complement C5                                                  | 21,3               | 0,04  | 68             | 467    | 0,12          | 14,9               | 0,154 | 17             | 311  | 0,13          |
| E2RG76                        | Complement C6                                                  | 1000               | 0,025 | 177            | 127    | 34,84         | 0                  | 0,089 | 0              | 123  | 0,00          |
| E2RG01                        | Complement C7                                                  | 1000               | 0,157 | 56             | 257    | 34,21         | 0                  | 0,225 | 0              | 82   | 0,00          |
| E2R109                        | Complement C8 alpha chain                                      | 1000               | 0,143 | 14             | 45     | 44,49         | 2,26               | 0,011 | 1              | 10   | 0,00          |
| E2R141                        | Complement C8 beta chain                                       | 2,41               | 0,197 | 4              | 76     | 0,02          | n.a.               |       |                |      |               |
| J9P8Z6                        | Complement C9                                                  | 5,79               | 0     | 8              | 0      | #DIV/0!       | n.a.               |       |                |      |               |
| F1PY40                        | Complement factor I                                            | 66,2               | 0,164 | 48             | 462    | 1,13          | 49,5               | 0,065 | 30             | 161  | 0,60          |
| J9NTL7                        | Complement factor H (homolog in mammals)                       | 69,5               | 0,086 | 162            | 2069   | 0,47          | 47,6               | 0,057 | 87             | 2884 | 0,08          |
| E2RS80                        | Complement factor B (homolog in primates)                      | 39                 | 0,078 | 452            | 1516   | 0,91          | 25                 | 0,156 | 57             | 762  | 0,29          |
| F1PGM9                        | Complement component 4 binding protein alpha                   | 170,4              | 0,17  | 1105           | 2308   | 13,87         | 20,2               | 0,11  | 279            | 1332 | 0,47          |
| G1K2D9                        | Haptoglobin                                                    | 114                | 0,07  | 1849           | 3024   | 4,88          | 0                  | 0,127 | 0              | 5882 | 0,00          |
| F6LME0                        | α2-macroglobulin                                               | 77,55              | 0,093 | 2383           | 6931   | 2,48          | 179                | 0,087 | 277            | 3986 | 1,08          |
| F6Y713                        | α1-acid glycoprotein                                           | 23                 | 0,182 | 816            | 367    | 9,31          | 13,6               | 0,253 | 29             | 1467 | 0,07          |
| P33703                        | APOH, Beta-2-glycoprotein 1                                    | 42,2               | 0,177 | 293            | 582    | 3,76          | 15,7               | 0,077 | 112            | 328  | 0,41          |
| T2KEN6                        | Pentraxin                                                      | 3,53               | 0,006 | 117            | 41     | 0,06          | 0                  | 0,307 | 0              | 174  | 0,00          |
| A1LLJ0                        | Alpha-1-antitrypsin                                            | 6,2                | 0,076 | 147            | 52     | 1,33          | 4,08               | 0,186 | 24             | 175  | 0,10          |
| F1PAX2                        | Ceruloplasmin                                                  | 4,38               | 0,055 | 363            | 1283   | 0,07          | 6,28               | 0,159 | 49             | 688  | 0,07          |
| F1PCE5                        | Serpin family A member 1                                       | 114                | 0,151 | 396            | 1353   | 5,04          | 53,1               | 0,18  | 378            | 1233 | 2,93          |
| F1PH86                        | Serpin family A member 3                                       | n.f.               |       |                |        |               | 2,4                | 0,298 | 17             | 107  | 0,11          |
| E2RMF9                        | Serpin family A member 5                                       | 0                  | 0,164 | 0              | 39     | 0,00          | 34                 | 0,195 | 4              | 20   | 1,33          |
| F1PB85                        | Serpin family A member 7                                       | 8,55               | 0,319 | 20             | 22     | 2,48          | 0                  | 0,245 | 0              | 23   | 0,00          |
| F1PYX9                        | Serpin family G member 1                                       | 11,3               | 0,064 | 183            | 944    | 0,14          | 12,9               | 0,13  | 24             | 499  | 0,08          |
| J9P8Q8                        | Serpin family D member 1                                       | 2,17               | 0,233 | 12             | 245    | 0,02          | 2,53               | 0,334 | 29             | 86   | 0,28          |
| J9NS57                        | Leucine rich alpha-2-glycoprotein 1                            | 2,2                | 0,275 | 289            | 133    | 13,15         | 10,6               | 0,208 | 68             | 348  | 0,43          |
| J9NVF9                        | Serum amyloid A                                                | 86,4               | 0     | 70             | 0      | #DIV/0!       | 0                  | 0,148 | 0              | 275  | 0,00          |
| F1PAL5                        | Angiotensinogen                                                | 19,4               | 0,289 | 48             | 75     | 3,59          | 6,4                | 0,186 | 28             | 40   | 0,83          |
| Q7M310                        | Angiotensin I                                                  | 2,84               | 0,277 | 69             | 38     | 1,43          | n.f.               |       |                |      |               |
| F1PN98                        | Coagulation factor V                                           | 3,35               | 0     | 107            | 0      | #DIV/0!       | 0                  | 0,007 | 0              | 33   | 0,00          |
| J9NSF9                        | Prothrombin                                                    | 51                 | 0,17  | 292            | 797    | 3,18          | 11,9               | 0,214 | 35             | 350  | 0,25          |
| F1PZR4                        | Hemopexin                                                      | 44,9               | 0,136 | 83             | 563    | 0,90          | 68,7               | 0,166 | 144            | 1162 | 1,41          |
| F1Q421                        | Plasminogen                                                    | n.a.               |       |                |        |               | 52,6               | 0,251 | 97             | 403  | 3,18          |
| J9P430                        | Transferrin                                                    | 20,4               | 0,123 | 1424           | 6332   | 0,56          | 29,1               | 0,142 | 191            | 4721 | 0,17          |
| F6V1W9                        | Transferrin                                                    | 4,12               | 0,335 | 11             | 5      | 3,04          | 3,95               | 0,23  | 3              | 3    | 0,91          |
| J9LHX7                        | Serotransferrin (homolog, several species)                     | 9,23               | 0,344 | 355            | 776    | 1,45          | 20,2               | 0,208 | 102            | 477  | 0,90          |
| E2OZQ1                        | Serotransferrin (homolog, several species)                     | 6,75               | 0,256 | 17             | 55     | 0,53          | 1000               | 0,09  | 9              | 20   | 40,50         |
| F1PKX3                        | Coagulation factor XIII A chain                                | 2,76               | 0,103 | 6              | 83     | 0,02          | 41,2               | 0,401 | 8              | 3    | 44,06         |
| F1Q041                        | Coagulation factor XIII B chain                                | 1000               | 0,025 | 6              | 38     | 3,95          | 1000               | 0,068 | 6              | 19   | 21,47         |
| F1PSS8                        | Protein S                                                      | 2,98               | 0,125 | 26             | 170    | 0,06          | 0                  | 0,174 | 0              | 121  | 0,00          |
| F1Q4A3                        | Coagulation factor X                                           | 0                  | 0,236 | 0              | 25     | 0,00          | 20,5               | 0,013 | 18             | 2    | 2,40          |
| E2R4E7                        | Afamin                                                         | 6,76               | 0,318 | 297            | 1075   | 0,59          | 14                 | 0,268 | 37             | 604  | 0,23          |
| F6Y3P9                        | Gelsolin                                                       | 34,5               | 0,259 | 218            | 529    | 3,68          | 20                 | 0,23  | 91             | 114  | 3,67          |
| E2R5U8                        | Transthyretin                                                  | 8,76               | 0,218 | 65             | 1143   | 0,11          | n.a.               |       |                |      |               |
| A0A1K0FUG                     | Globin A1                                                      | 109                | 0,103 | 229            | 60     | 42,85         | 1000               | 0,01  | 21             | 32   | 6,56          |
| A0A1K0GGH                     | Globin A2                                                      | 103                | 0,047 | 118            | 34     | 16,80         | 0                  | 0,157 | 0              | 42   | 0,00          |
| J9NXL3                        | Hemoglobin subunit alpha (dog homolog)                         | 115                | 0,101 | 155            | 52     | 34,62         | 2,8                | 0,11  | 2              | 101  | 0,01          |
| E2R9B6                        | Fetuin B                                                       | 30,4               | 0,221 | 148            | 212    | 4,69          | 2                  | 0,24  | 16             | 228  | 0,03          |
| F1PYM4                        | Insulin like growth factor binding protein acid labile subunit | 31                 | 0,258 | 15             | 147    | 0,82          | 3,15               | 0,24  | 21             | 10   | 1,59          |
| B5U1S6                        | Adiponectin (fragment)                                         | 1000               | 0,132 | 22             | 56     | 51,86         | 1000               | 0,004 | 14             | 29   | 1,93          |
| F1PDJ7                        | Alpha-2-glycoprotein 1                                         | 3,75               | 0,292 | 20             | 11     | 1,99          | n.a.               |       |                |      |               |
| E2RPW3                        | Paraoxonase 1                                                  | 3,55               | 0,018 | 33             | 28     | 0,08          | 1000               | 0,047 | 45             | 8    | 264,38        |
| J9P8B0                        | Dipeptidyl peptidase 4                                         | 2,31               | 0     | 10             | 0      | #DIV/0!       | n.a.               |       |                |      |               |
| F1PCK2                        | α1-B glycoprotein                                              | 21,9               | 0,02  | 714            | 469    | 0,67          | 25,2               | 0,127 | 978            | 1688 | 1,85          |
| F1Q4D9                        | Retinol binding protein 4                                      | 8,97               | 0,18  | 12             | 98     | 0,20          | 25,06              | 0,304 | 13             | 20   | 4,95          |
| E2RPB8                        | C-type lectin domain family 3 member B                         | n.a.               |       |                |        |               | 2,59               | 0,279 | 11             | 134  | 0,06          |
| E2RQK6                        | Galectin 3 binding protein                                     | 2,24               | 0,253 | 18             | 6      | 1,70          | 3,3                | 0,067 | 24             | 64   | 0,08          |
| <b>Apolipoproteins</b>        |                                                                |                    |       |                |        |               |                    |       |                |      |               |
| J9P843                        | Apo AI                                                         | 325                | 0,16  | 4231           | 17259  | 12,75         | 41,1               | 0,061 | 325            | 1356 | 0,60          |
| E2RE76                        | Apo AIV                                                        | 6,76               | 0,115 | 324            | 574    | 0,44          | 21,5               | 0,21  | 164            | 146  | 5,07          |
| P56595                        | Apo CI                                                         | 4,72               | 0,206 | 8              | 147    | 0,05          | 3,97               | 0     | 14             | 6    | #DIV/0!       |
| 9NWJ6                         | Apo CII                                                        | 15,8               | 0,153 | 58             | 770    | 0,18          | 50,3               | 0,274 | 33             | 35   | 12,99         |
| D5G334                        | Apo E4 (fragment)                                              | 4,8                | 0,162 | 44             | 212    | 0,16          | 37,4               | 0,233 | 55             | 116  | 4,13          |
| F1PJ74                        | Apo E                                                          | 15                 | 0,19  | 32             | 269    | 0,34          | 33                 | 0,279 | 34             | 107  | 2,93          |
| E2RQ71                        | Apo M                                                          | 6,86               | 0,278 | 22             | 458    | 0,09          | 2,57               | 0,401 | 26             | 23   | 1,16          |
| F1P8Z5                        | Apo B                                                          | 87                 | 0,124 | 470            | 7485   | 0,68          | 19,3               | 0,107 | 115            | 2837 | 0,08          |
| E2RNM1                        | Apo D                                                          | 11,7               | 0,16  | 44             | 111    | 0,74          | 108,2              | 0,124 | 61             | 27   | 30,31         |
| <b>Intracellular proteins</b> |                                                                |                    |       |                |        |               |                    |       |                |      |               |
| F1PZK8                        | Dynein heavy chain domain 1                                    | 1000               | 0,175 | 24             | 23     | 182,61        | 3,24               | 0,416 | 3              | 3    | 1,35          |
| E2RB62                        | Myosin IB                                                      | 6,19               | 0,147 | 2              | 8      | 0,23          |                    |       |                |      |               |
| E2R1Q3                        | Myosin XVIIIIB                                                 | n.a.               |       |                |        |               | 3,02               | 0     | 5              | 0    | #DIV/0!       |
| J9P187                        | Myosin IXA                                                     | 894                | 0,202 | 94             | 257    | 66,05         | 328                | 0,278 | 51             | 60   | 77,51         |
| J9P007                        | Kinesin-like protein                                           | 3,43               | 0     | 8              | 0      | #DIV/0!       | 3,46               | 0,146 | 4              | 2    | 1,01          |
| F1PM26                        | CD109 molecule                                                 | 17,3               | 0,16  | 20             | 9      | 6,15          | n.f.               |       |                |      |               |
| J9P216                        | Formin 1                                                       | 1000               | 0,266 | 10             | 13     | 204,62        | 4,95               | 0     | 9              | 0    | #DIV/0!       |
| J9P7F7                        | Ficolin 1                                                      | 1000               | 0,123 | 7              | 38     | 22,66         | 4,1                | 0,017 | 23             | 13   | 0,12          |
| F1PAQ3                        | Maltase-glucoamylase                                           | 6,49               | 0,284 | 70             | 185    | 0,70          | 2,18               | 0,005 | 11             | 26   | 0,00          |
| J9P5V6                        | Talin 1                                                        | 17,6               | 0,158 | 3              | 7      | 1,19          | 128                | 0,247 | 1              | 4    | 7,90          |
| E2RFS6                        | Sacsin molecular chaperone                                     | 12                 | 0,418 | 4              | 7      | 2,87          | 12,7               | 0,333 | 3              | 5    | 2,54          |



|                                      |                                                                   |       |       |      |      |         |       |        |     |      |         |
|--------------------------------------|-------------------------------------------------------------------|-------|-------|------|------|---------|-------|--------|-----|------|---------|
| E2QV33                               | Mediator complex subunit 22 (RNA-Pol)                             | 98,4  | 0     | 26   | 0    | #DIV/0! | 0     | 0,097  | 0   | 28   | 0,00    |
| E2R926                               | Fukutin                                                           | 29,5  | 0,021 | 12   | 2    | 3,72    | n.f.  |        |     | 4    | 4,80    |
| E2RP26                               | Filamin C                                                         | 0     | 0,026 | 0    | 14   | 0,00    | n.f.  |        |     | 0    | #DIV/0! |
| E2RK65                               | Kelch like family member 8                                        | 7,84  | 0,04  | 10   | 4    | 0,78    | n.f.  |        |     | 0    | #DIV/0! |
| F1PRY8                               | Dispatched RND transporter family member 2                        | n.a.  |       |      |      | 1000    | 0     |        | 5   | 3    | #DIV/0! |
| F6Y1C9                               | DNA Polymerase                                                    | n.a.  |       |      |      | 4,14    | 0,232 |        | 20  | 4    | 4,80    |
| A0A0A0MPC1                           | Trafficking protein particle complex subunit 2                    | n.a.  |       |      |      | 1000    | 0     |        | 9   | 0    | #DIV/0! |
| J9NYC0                               | Microfibril associated protein 4                                  | n.a.  |       |      |      | 0       | 0,181 |        | 0   | 12   | 0,00    |
| J9P514                               | RB associated KRAB zinc finger                                    | 6,05  | 0,326 | 2    | 15   | 0,26    | 9,04  | 0      | 6   | 0    | #DIV/0! |
| J9P653                               | Ciliogenesis-associated TTC17-interacting protein (human homolog) | 10,1  | 0     | 10   | 0    | #DIV/0! | 2,9   | 0,396  | 2   | 14   | 0,16    |
| J9NYQ5                               | Growth arrest specific 2 like 3                                   | 6,17  | 0,33  | 4    | 2    | 4,07    | 11,5  | 0,437  | 7   | 1    | 35,18   |
| E2R1C3                               | Proteasome subunit alpha type                                     | 0     | 0,186 | 0    | 35   | 0,00    | 2,27  | 0,08   | 33  | 6    | 1,00    |
| J9NY53                               | Regulating synaptic membrane exocytosis 2                         | 2,18  | 0,367 | 5    | 4    | 1,00    | 0     | 0,276  | 0   | 5    | 0,00    |
| E2RF52                               | Proteasome subunit alpha type                                     | n.f.  |       |      |      |         | 171   | 0      | 7   | 0    | #DIV/0! |
| <b>Extracellular matrix proteins</b> |                                                                   |       |       |      |      |         |       |        |     |      |         |
| J9P8M2                               | Fibronectin                                                       | 28,9  | 0,164 | 386  | 3982 | 0,46    | 32,6  | 0,157  | 39  | 1842 | 0,11    |
| E2QTQ1-                              | Ankyrin repeat and BTB domain containing 1                        | 0     | 0,346 | 0    | 4    | 0,00    | 92    | 0,015  | 29  | 30   | 1,33    |
| J9NV47                               | Hyaluronan binding protein 2                                      | 31,6  | 0     | 82   | 0    | #DIV/0! | 2,18  | 0,116  | 4   | 5    | 0,20    |
| F1Q1K9                               | Hyaluronan binding protein 2                                      | 31,3  | 0     | 16   | 0    | #DIV/0! | n.a.  |        |     |      |         |
| F1Q315                               | Collagen α1(I) chain                                              | 2,87  | 0     | 74   | 0    | #DIV/0! | 0     | 0,197  | 0   | 136  | 0,00    |
| E5G723                               | Collagen α1 (I) (Fragment)                                        | 31,05 | 0,096 | 6    | 12   | 1,49    | 1000  | 0,106  | 13  | 10   | 137,80  |
| F1PHY1                               | Collagen α2 (I) chain                                             | 3,26  | 0,254 | 11   | 1    | 9,11    | 0     | 0,219  | 0   | 73   | 0,00    |
| F1PJH3                               | Collagen type XIII alpha 1 chain                                  | 455   | 0     | 36   | 0    | #DIV/0! | 0     | 0,235  | 0   | 36   | 0,00    |
| J9NRV7                               | Fibrinogen alpha chain                                            | 265   | 0,078 | 1394 | 2959 | 9,74    | 0     | 0,092  | 0   | 1970 | 0,00    |
| F1PW65                               | Fibrinogen beta chain                                             | 96,9  | 0,095 | 1600 | 4493 | 3,28    | 37,4  | 0,075  | 483 | 3248 | 0,42    |
| F1P8G0                               | Fibrinogen gamma chain                                            | 399   | 0,1   | 1683 | 3016 | 22,27   | 53,4  | 0,116  | 200 | 1983 | 0,62    |
| F1Q418                               | Inter-alpha-trypsin inhibitor heavy chain 1                       | 4,02  | 0,127 | 135  | 829  | 0,08    | 2,98  | 0,053  | 158 | 618  | 0,04    |
| F1PG39                               | Inter-alpha-trypsin inhibitor heavy chain 2                       | 3,09  | 0,1   | 142  | 716  | 0,06    | 42    | 0,094  | 38  | 554  | 0,27    |
| J9P713                               | Inter-alpha-trypsin inhibitor heavy chain 3                       | 0     | 0,139 | 0    | 484  | 0,00    | 25,7  | 0,076  | 81  | 115  | 1,38    |
| H9GWY3                               | Inter-alpha-trypsin inhibitor heavy chain 4                       | 59,9  | 0,157 | 423  | 2238 | 1,78    | 5,51  | 0,083  | 146 | 846  | 0,08    |
| J9NU16                               | Alpha-1-microglobulin/bikunin precursor                           | 33,6  | 0,055 | 27   | 252  | 0,20    | 75    | 0,053  | 36  | 115  | 1,24    |
| E2RQF8                               | Extracellular matrix protein 1 (human homolog)                    | 24,1  | 0,191 | 38   | 93   | 1,88    | 0     | 0,257  | 0   | 23   | 0,00    |
| J9P669                               | Cadherin 5                                                        | 3,3   | 0,141 | 19   | 29   | 0,30    | 5,54  | 0,262  | 4   | 4    | 1,45    |
| J9PAA4                               | Carboxypeptidase N subunit 2                                      | 5,81  | 0,141 | 97   | 110  | 0,72    | 177   | 0,038  | 4   | 142  | 0,19    |
| F1PLT8                               | Sulfhydryl oxidase                                                | 2,92  | 0     | 20   | 0    | #DIV/0! | 0     | 0,343  | 0   | 30   | 0,00    |
| J9P319                               | Osteomodulin                                                      | 0     | 0,13  | 0    | 29   | 0,00    | 2,9   | 0,216  | 12  | 18   | 0,42    |
| E2RJE0                               | Cartilage oligomeric matrix protein                               | 0     | 0,155 | 0    | 47   | 0,00    | 1000  | 0      | 3   | 0    | #DIV/0! |
| F1PV43                               | Capping actin protein of muscle Z-line alpha subunit 3            | 11,1  | 0     | 7    | 0    | #DIV/0! | n.f.  |        |     |      |         |
| F1Q1P0                               | Coiled-coil domain containing 178                                 | 39,7  | 0,213 | 19   | 7    | 22,95   | 17,2  | 0,116  | 14  | 2    | 13,97   |
| E2R416                               | Lumican                                                           | 44,5  | 0,15  | 36   | 114  | 2,11    | 11,9  | 0,051  | 58  | 118  | 0,30    |
| F6Y120                               | Serine/arginine repetitive matrix protein 3 (homolog)             | 20,90 | 0,38  | 14   | 12   | 9,22    | 3,78  | 0,142  | 10  | 12   | 0,45    |
| Q2YF02                               | Vitronectin (fragment),                                           | 68,7  | 0,303 | 45   | 64   | 14,64   | 2,38  | 0,11   | 15  | 9    | 0,44    |
| H2BF45                               | Attractin (fragment)                                              | n.a.  |       |      |      |         | 4,14  | 0,002  | 7   | 39   | 0,00    |
| F1Q117                               | Attractin                                                         | n.a.  |       |      |      |         | 2,75  | 0,0003 | 3   | 9    | 0,00    |

**Supplementary Table S5: Concentrations of some BM candidates determined by ELISA in dog samples.**

| BM candidate | Sam-ple | Concentration              |                     |              |                            | Unit               | n | ELISA                   |
|--------------|---------|----------------------------|---------------------|--------------|----------------------------|--------------------|---|-------------------------|
|              |         | AM                         | NM                  | CF           | NF                         |                    |   |                         |
| LRG1         | s       | <b>26.26</b>               | <b>9.70</b>         |              |                            | ng/ml              | 1 | MBS075175               |
|              | p       | 27.03                      | 28.19               |              |                            | ng/ml              | 1 |                         |
|              | u       | <b>10.10</b>               | <b>8.41</b>         |              |                            | μg/g c             | 1 |                         |
| gelsolin     | s       | <b>214.1<sup>(4)</sup></b> | <b>194.4</b>        | <b>162.9</b> | <b>140.3<sup>(2)</sup></b> | ng/ml <sup>a</sup> | 1 | MBS2603447              |
|              | s       | <b>24.11</b>               | <b>18.03</b>        | 16.33        | 19.91                      | μg/ml <sup>b</sup> | 2 |                         |
|              | p       | <b>28.70</b>               | <b>9.48</b>         | 14.45        | 19.11                      | μg/ml <sup>b</sup> | 2 |                         |
|              | u       | <b>0.17</b>                | <b>0.00</b>         | 0.68         | 1.41                       | μg/g c             | 2 |                         |
| lumican      | p       | 16.1                       | 21.6                | 15.0         | 17.8                       | ng/ml              | 1 | MBS2607240              |
| PICP         | p       | <b>12.4</b>                | <b>9.51</b>         | 7.31         | 9.68                       | ng/ml              | 1 | MBS2608196              |
| ColXIII      | p       | <b>0.338</b>               | <b>0.137</b>        | 0.266        | 0.177                      | ng/ml              | 1 | SEC138Hu                |
|              | u       | <b>0.576</b>               | <b>0</b>            | 0.172        | 0.115                      | μg/g c             | 1 |                         |
| SAA          | p       | <b>6.67</b>                | <b>1.89</b>         | 4.09         | 2.20                       | μg/ml              | 1 | MBS740421 <sup>c</sup>  |
|              | u       | <b>23.08</b>               | <b>9.46</b>         | 8.02         | 7.34                       | μg/g c             | 1 |                         |
|              | p       | 7.53                       | 7.27                | 7.24         | 6.56                       | ng/ml              | 1 | MBS1602508 <sup>d</sup> |
|              | u       | <b>52.29</b>               | <b>43.65</b>        | <b>15.06</b> | <b>26.96</b>               | ng/g c             | 1 |                         |
| ADN          | s       | 4.96                       | 7.15 <sup>(1)</sup> | 5.68         | 5.77                       | μg/ml              | 3 | RD191023100             |
|              | p       | 5.41                       | 7.06 <sup>(1)</sup> | <b>6.72</b>  | <b>4.78</b>                | μg/ml              | 3 |                         |
|              | u       | <b>4.59</b>                | <b>0.00</b>         | 0.36         | 1.43                       | μg/g c             | 3 |                         |
| TGFβ1        | p       | 8.27                       | 12.30               | 4.62         | 5.18                       | ng/ml              | 1 | RAF122R                 |
|              | s       | 31.88                      |                     | 47.47        | 22.92                      | ng/ml              | 1 |                         |
|              | u       | 8.05                       | 3.97                | 4.60         | 3.28                       | μg/g c             | 1 |                         |

ELISA (last column) have been performed by according to the supplier's instructions each in duplicate and with different dilutions to meet the measuring range of the respective assay.

n: sample count for all of the line, in parenthesis when different from the value given in 8<sup>th</sup> column.

s: serum; p: plasma; u: urine. In urine BM concentrations are normalized by creatinine (c). Sample dilution: <sup>a</sup>1 to 20, <sup>b</sup>1 to 2500. ELISA detects: <sup>c</sup>intact protein, <sup>d</sup>c-terminal fragment.

**Bold:** trend in blood in accordance with proteomic data of distinct clusters, cf. Table 4; **bold and**

**italic:** trend in urine in accordance with the trend in blood. Empty cells: no more samples available.

| Pearson  | ADP    | a1AGP  | AGT    | Col-XIII | GS     | LRGP1  | HABP2  | PICP   | TGFβ    | VTN    | C9     | C4BP   | CRP    | CFH    | CFI    | FMN    | LUM    | FGG    | C1q    | Spearman |
|----------|--------|--------|--------|----------|--------|--------|--------|--------|---------|--------|--------|--------|--------|--------|--------|--------|--------|--------|--------|----------|
| ADP      |        | .284** | .380** | -0.056   | .365** | .271** | .172** | .417** | .210**  | .326** | .398** | -0.049 | -0.077 | -0.042 | .281** | .193** | -0.244 | .213** | 0.107  | ADP      |
|          |        | 0.000  | 0.000  | 0.367    | 0.000  | 0.000  | 0.006  | 0.000  | 0.001   | 0.000  | 0.000  | 0.417  | 0.207  | 0.497  | 0.000  | 0.002  | 0.251  | 0.000  | 0.181  |          |
| a1AGP    | .318** |        | .410** | .280**   | .511** | .149*  | .320** | .387** | 0.043   | .248** | .652** | .404** | .201** | .489** | .703** | .333** | .425*  | .420** | .415** | a1AGP    |
|          | 0.000  |        | 0.000  | 0.000    | 0.000  | 0.014  | 0.000  | 0.000  | 0.500   | 0.000  | 0.000  | 0.000  | 0.001  | 0.000  | 0.000  | 0.000  | 0.038  | 0.000  | 0.000  |          |
| AGT      | .495** | .260** |        | .141*    | .746** | .128*  | .492** | .517** | .353**  | .694** | .570** | .256** | 0.098  | .186** | .663** | .372** | .674** | .521** | .342** | AGT      |
|          | 0.000  | 0.000  |        | 0.024    | 0.000  | 0.037  | 0.000  | 0.000  | 0.000   | 0.000  | 0.000  | 0.000  | 0.116  | 0.003  | 0.000  | 0.000  | 0.000  | 0.000  | 0.000  |          |
| Col-XIII | 0.041  | .256** | .327** |          | .250** | .185** | .380** | 0.066  | -.178** | -0.046 | .133*  | .527** | .317** | .529** | .313** | .299** | 0.290  | .363** | .290** | Col-XIII |
|          | 0.506  | 0.000  | 0.000  |          | 0.000  | 0.002  | 0.000  | 0.291  | 0.005   | 0.455  | 0.032  | 0.000  | 0.000  | 0.000  | 0.000  | 0.000  | 0.170  | 0.000  | 0.000  |          |
| GS       | .493** | .221** | .702** | .212**   |        | 0.117  | .422** | .409** | .161*   | .478** | .603** | .315** | 0.123  | .343** | .751** | .402** | .484*  | .467** | .383** | GS       |
|          | 0.000  | 0.000  | 0.000  | 0.001    |        | 0.062  | 0.000  | 0.000  | 0.014   | 0.000  | 0.000  | 0.000  | 0.052  | 0.000  | 0.000  | 0.000  | 0.016  | 0.000  | 0.000  |          |
| LRGP1    | .251** | 0.095  | .258** | 0.108    | 0.088  |        | .154*  | 0.091  | 0.045   | 0.047  | 0.098  | .330** | .243** | .228** | .177** | .354** | .431*  | .336** | .350** | LRGP1    |
|          | 0.000  | 0.119  | 0.000  | 0.079    | 0.159  |        | 0.014  | 0.134  | 0.482   | 0.437  | 0.111  | 0.000  | 0.000  | 0.000  | 0.004  | 0.000  | 0.035  | 0.000  | 0.000  |          |
| HABP2    | 0.078  | .384** | .242** | .310**   | .128*  | 0.041  |        | .290** | -0.049  | .258** | .337** | .367** | .228** | .326** | .458** | .364** | .614** | .374** | .176*  | HABP2    |
|          | 0.217  | 0.000  | 0.000  | 0.000    | 0.040  | 0.511  |        | 0.000  | 0.459   | 0.000  | 0.000  | 0.000  | 0.000  | 0.000  | 0.000  | 0.000  | 0.001  | 0.000  | 0.028  |          |
| PICP     | .584** | .425** | .390** | 0.081    | .441** | 0.078  | .233** |        | .511**  | .561** | .467** | 0.109  | -0.032 | 0.121  | .493** | 0.063  | 0.144  | .325** | .267** | PICP     |
|          | 0.000  | 0.000  | 0.000  | 0.193    | 0.000  | 0.199  | 0.000  |        | 0.000   | 0.000  | 0.000  | 0.076  | 0.590  | 0.051  | 0.000  | 0.307  | 0.511  | 0.000  | 0.001  |          |
| TGFβ     | 0.039  | .144*  | 0.030  | 0.070    | 0.018  | -0.019 | .586** | .230** |         | .460** | .263** | -.155* | -.132* | -0.088 | .167** | 0.042  | 0.060  | .162*  | .232** | TGFβ     |
|          | 0.542  | 0.024  | 0.645  | 0.274    | 0.780  | 0.764  | 0.000  | 0.000  |         | 0.000  | 0.000  | 0.015  | 0.039  | 0.176  | 0.010  | 0.511  | 0.779  | 0.011  | 0.006  |          |
| VTN      | .416** | .463** | .575** | 0.046    | .553** | .259** | .162** | .456** | 0.010   |        | .519** | .127*  | -0.007 | -0.030 | .459** | 0.112  | .436*  | .405** | .224** | VTN      |
|          | 0.000  | 0.000  | 0.000  | 0.451    | 0.000  | 0.000  | 0.009  | 0.000  | 0.870   |        | 0.000  | 0.036  | 0.914  | 0.627  | 0.000  | 0.069  | 0.033  | 0.000  | 0.005  |          |
| C9       | .560** | .456** | .563** | 0.093    | .531** | .271** | .229** | .398** | 0.028   | .626** |        | .240** | .167** | .358** | .704** | .270** | .535** | .372** | .502** | C9       |
|          | 0.000  | 0.000  | 0.000  | 0.134    | 0.000  | 0.000  | 0.000  | 0.000  | 0.669   | 0.000  |        | 0.000  | 0.007  | 0.000  | 0.000  | 0.000  | 0.007  | 0.000  | 0.000  |          |
| C4BP     | .548** | .370** | .278** | .263**   | .336** | .149*  | .267** | .315** | 0.003   | .247** | .490** |        | .359** | .577** | .492** | .342** | .713** | .437** | .291** | C4BP     |
|          | 0.000  | 0.000  | 0.000  | 0.000    | 0.000  | 0.014  | 0.000  | 0.000  | 0.965   | 0.000  | 0.000  |        | 0.000  | 0.000  | 0.000  | 0.000  | 0.000  | 0.000  | 0.000  |          |
| CRP      | -0.041 | 0.034  | 0.024  | .397**   | 0.039  | .214** | 0.066  | -0.033 | -0.011  | -0.016 | 0.001  | .123*  |        | .309** | .272** | .255** | .574** | .244** | .272** | CRP      |
|          | 0.496  | 0.585  | 0.701  | 0.000    | 0.536  | 0.00   | 0.298  | 0.581  | 0.858   | 0.788  | 0.983  | 0.044  |        | 0.000  | 0.000  | 0.000  | 0.003  | 0.000  | 0.001  |          |
| CFH      | .411** | .237** | .545** | .252**   | .747** | .173** | .352** | .315** | 0.010   | .486** | .560** | .444** | 0.101  |        | .490** | .339** | .460*  | .306** | .393** | CFH      |
|          | 0.000  | 0.000  | 0.000  | 0.000    | 0.000  | 0.005  | 0.000  | 0.000  | 0.872   | 0.000  | 0.000  | 0.000  | 0.104  |        | 0.000  | 0.000  | 0.024  | 0.000  | 0.000  |          |
| CFI      | .409** | .596** | .484** | .229**   | .686** | 0.082  | .467** | .446** | 0.029   | .601** | .486** | .474** | 0.069  | .740** |        | .367** | .516** | .497** | .545** | CFI      |
|          | 0.000  | 0.00   | 0.000  | 0.000    | 0.000  | 0.182  | 0.000  | 0.000  | 0.655   | 0.000  | 0.000  | 0.000  | 0.268  | 0.000  |        | 0.000  | 0.010  | 0.000  | 0.000  |          |
| FMN      | .122*  | .383** | .371** | .569**   | .138*  | 0.096  | .464** | .140*  | 0.011   | 0.094  | .178** | .388** | .167** | .330** | .314** |        | .772** | .346** | .352** | FMN      |
|          | 0.047  | 0.000  | 0.000  | 0.000    | 0.030  | 0.116  | 0.000  | 0.022  | 0.867   | 0.129  | 0.004  | 0.000  | 0.006  | 0.000  | 0.000  |        | 0.000  | 0.000  | 0.000  |          |
| LUM      | -0.086 | 0.230  | .505*  | 0.121    | 0.152  | 0.087  | 0.241  | -0.093 | 0.292   | 0.156  | 0.132  | .475*  | 0.026  | 0.191  | 0.116  | .633** |        | .569** | 0.317  | LUM      |
|          | 0.689  | 0.279  | 0.012  | 0.572    | 0.477  | 0.686  | 0.256  | 0.671  | 0.166   | 0.465  | 0.537  | 0.019  | 0.903  | 0.372  | 0.589  | 0.002  |        | 0.006  | 0.141  |          |
| FGG      | .176** | .343** | .401** | .452**   | .284** | .154*  | .600** | .192** | 0.019   | .323** | .353** | .397** | .201** | .527** | .560** | .730** | 0.411  |        | .396** | FGG      |
|          | 0.004  | 0.000  | 0.000  | 0.000    | 0.000  | 0.011  | 0.000  | 0.002  | 0.770   | 0.000  | 0.000  | 0.000  | 0.001  | 0.000  | 0.000  | 0.000  | 0.057  |        | 0.000  |          |
| C1q      | -0.024 | 0.020  | -0.030 | .318**   | 0.022  | .694** | 0.035  | 0.005  | 0.017   | 0.021  | 0.041  | .215** | .558** | .456** | 0.124  | 0.073  | -0.124 | 0.089  |        | C1q      |
|          | 0.766  | 0.801  | 0.710  | 0.000    | 0.783  | 0.000  | 0.665  | 0.955  | 0.841   | 0.795  | 0.611  | 0.007  | 0.000  | 0.000  | 0.121  | 0.369  | 0.575  | 0.268  |        |          |

**Supplementary Table S6: Correlation of each BM with each other's.**

Analyses were performed by SPSS (v.27). Lower left halve: correlation according Pearson; upper right halve: correlation according Spearman. Each cell shows the correlation coefficient (upper figure) and a p-value (lower figure).

\* and \*\* indicate significant and highly significant correlations proposed by SPSS. Notwithstanding that, we set a correlation coefficient >0.500 (Pearson) moderately significant and >0.600 highly significant and mark these values in blue (Pearason) and green (Spearman).

**Table S7: Correlation of serum and urinary BM candidates with UACR and serum creatinine in patients with AS and similar diseases**

| BM in→<br>↓ | UACR    |          |    |         |          |    | Serum creatinine |          |    |         |          |    |
|-------------|---------|----------|----|---------|----------|----|------------------|----------|----|---------|----------|----|
|             | Serum   |          |    | Urine   |          |    | Serum            |          |    | Urine   |          |    |
|             | Pearson | Spearman | n  | Pearson | Spearman | n  | Pearson          | Spearman | n  | Pearson | Spearman | n  |
| ADP         | 0.110   | .442**   | 37 | -0.101  | -0.006   | 44 | -0.260           | -0.257   | 39 | -0.100  | -0.047   | 45 |
|             | 0.515   | 0.006    |    | 0.514   | 0.968    |    | 0.110            | 0.114    |    | 0.512   | 0.761    |    |
| a1AGP       | -0.220  | 0.047    | 24 | 0.117   | .628**   | 42 | -0.160           | -0.129   | 25 | -0.218  | -0.200   | 43 |
|             | 0.303   | 0.828    |    | 0.459   | <.001    |    | 0.444            | 0.538    |    | 0.160   | 0.199    |    |
| AGT         | .336*   | 0.060    | 37 | 0.139   | .426**   | 42 | .473**           | .524**   | 39 | -0.169  | -0.166   | 43 |
|             | 0.042   | 0.724    |    | 0.382   | 0.005    |    | 0.002            | <.001    |    | 0.278   | 0.287    |    |
| CoIXIII     | -0.072  | 0.191    | 37 | 0.242   | .387*    | 42 | .324*            | 0.087    | 39 | -.328*  | -.324*   | 43 |
|             | 0.672   | 0.257    |    | 0.122   | 0.011    |    | 0.044            | 0.6      |    | 0.032   | 0.034    |    |
| GS          | 0.039   | -0.030   | 37 | .363*   | .467**   | 42 | .358*            | .406*    | 39 | -0.096  | -0.078   | 43 |
|             | 0.817   | 0.858    |    | 0.018   | 0.002    |    | 0.025            | 0.010    |    | 0.540   | 0.619    |    |
| LRGP1       | -0.140  | 0.012    | 42 | 0.213   | .434**   | 44 | -0.004           | -0.104   | 44 | -0.214  | -0.277   | 45 |
|             | 0.375   | 0.938    |    | 0.165   | 0.003    |    | 0.980            | 0.501    |    | 0.158   | 0.065    |    |
| HABP2       | 0.271   | 0.270    | 37 | 0.166   | .497**   | 42 | -0.135           | -0.216   | 39 | -.398** | -.335*   | 43 |
|             | 0.104   | 0.107    |    | 0.293   | <.001    |    | 0.412            | 0.186    |    | 0.008   | 0.028    |    |
| PICP        | -0.176  | 0.133    | 42 | -0.065  | 0.152    | 41 | -.356*           | -0.301   | 43 | 0.048   | -0.152   | 41 |
|             | 0.266   | 0.400    |    | 0.686   | 0.342    |    | 0.019            | 0.050    |    | 0.765   | 0.343    |    |
| TGFB        | -0.166  | 0.262    | 40 | -0.003  | 0.247    | 44 | -.430**          | -.503**  | 41 | 0.030   | 0.078    | 45 |
|             | 0.305   | 0.103    |    | 0.983   | 0.107    |    | 0.005            | <.001    |    | 0.847   | 0.613    |    |
| VTN         | -0.226  | -.383*   | 42 | 0.106   | 0.246    | 42 | 0.227            | 0.222    | 44 | -0.068  | -0.065   | 43 |
|             | 0.151   | 0.012    |    | 0.504   | 0.116    |    | 0.138            | 0.147    |    | 0.665   | 0.680    |    |
| C9          | -0.021  | 0.085    | 38 | 0.145   | .631**   | 42 | -0.041           | -0.130   | 39 | -0.282  | -0.265   | 43 |
|             | 0.900   | 0.610    |    | 0.358   | <.001    |    | 0.804            | 0.430    |    | 0.067   | 0.086    |    |
| C4BP        | 0.003   | 0.156    | 37 | 0.295   | .654**   | 42 | -0.078           | -0.166   | 39 | -0.296  | -.313*   | 43 |
|             | 0.988   | 0.356    |    | 0.057   | <.001    |    | 0.635            | 0.313    |    | 0.054   | 0.041    |    |
| CRP         | -0.093  | 0.001    | 44 | -0.078  | .375*    | 42 | 0.025            | -0.077   | 45 | 0.041   | -0.294   | 42 |
|             | 0.549   | 0.993    |    | 0.622   | 0.014    |    | 0.870            | 0.617    |    | 0.797   | 0.059    |    |
| LUM         | 0.064   | -0.168   | 20 | .651**  | .510*    | 20 | 0.144            | 0.241    | 21 | -0.344  | -0.353   | 20 |
|             | 0.789   | 0.478    |    | 0.002   | 0.022    |    | 0.532            | 0.293    |    | 0.138   | 0.126    |    |
| FMN         | -0.111  | 0.155    | 35 | 0.173   | .514**   | 39 | 0.044            | -0.151   | 37 | -.341*  | -.365*   | 39 |
|             | 0.527   | 0.373    |    | 0.292   | <.001    |    | 0.797            | 0.373    |    | 0.033   | 0.022    |    |
| CFH         | 0.002   | 0.420    | 20 | 0.179   | .605**   | 42 | 0.011            | 0.044    | 20 | -0.252  | -.414**  | 43 |
|             | 0.994   | 0.066    |    | 0.257   | <.001    |    | 0.965            | 0.855    |    | 0.103   | 0.006    |    |
| CFI         | 0.298   | .620**   | 24 | 0.196   | .620**   | 4  | -0.322           | -0.297   | 24 | -0.280  | -.359*   | 43 |
|             | 0.157   | 0.001    |    | 0.213   | <.001    |    | 0.125            | 0.159    |    | 0.069   | 0.018    |    |
| FGG         | -0.603  | -.900*   | 5  | 0.145   | .326*    | 39 | 0.457            | 0.400    | 4  | -0.306  | -0.228   | 40 |
|             | 0.282   | 0.037    |    | 0.38    | 0.043    |    | 0.543            | 0.600    |    | 0.055   | 0.157    |    |
| C1q         | 0.050   | -0.029   | 38 | -0.115  | 0.339    | 34 | -0.047           | 0.106    | 39 | -0.124  | -.441**  | 34 |
|             | 0.767   | 0.865    |    | 0.516   | 0.05     |    | 0.776            | 0.522    |    | 0.485   | 0.009    |    |

First visit for sample set 1.

Correlation analyses were performed by SPSS (v.27). Cells contain the correlation coefficients (upper line) and the p-value (lower line). Significant correlations calculated by this software are indicated by stars and p-values below 0.05. We do not follow these proposals rather considered correlation coefficients of > 0.5 (bright grey) as moderately and > 0.6 (dark grey) as highly correlating.

**Graphical visualization of correlation considered as significant:**

Urinary lumican (ULUM) of first samples of sample set 1 with UACR of first and additional of the second samples

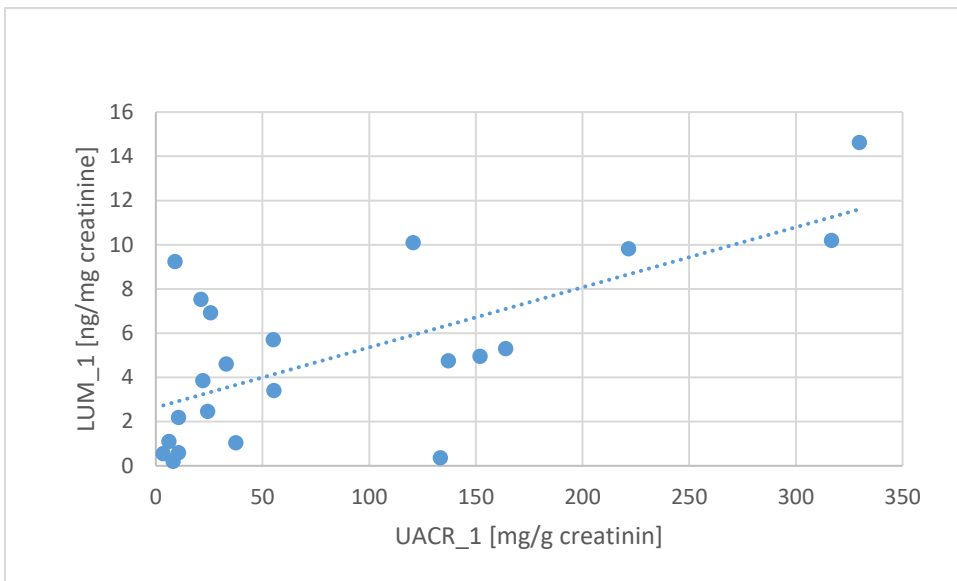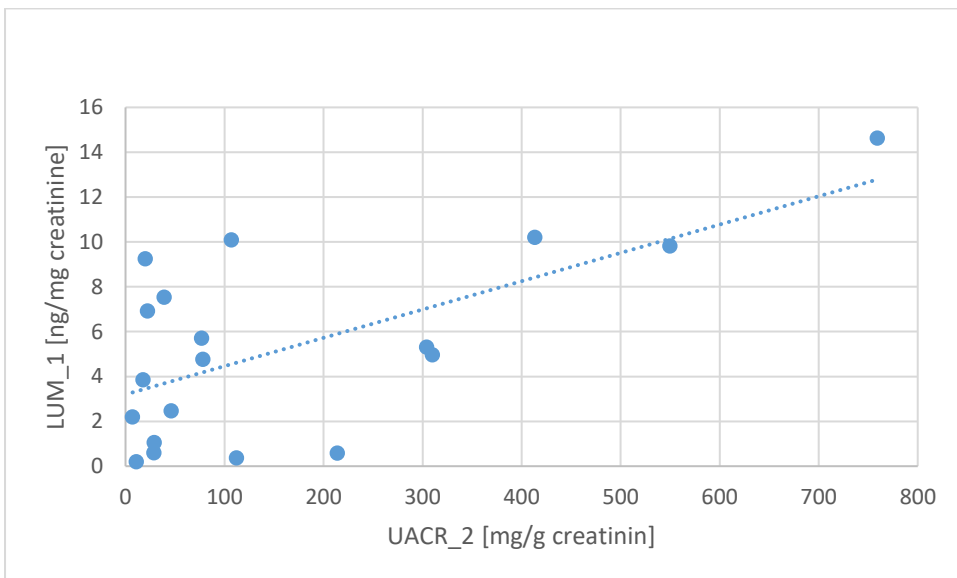

**Table S8: Correlation of serum and urinary BM candidates with eGFR and cGFR in patients with AS and similar diseases.**

| BM in→<br>↓ | eGFR   |         |    |        |        |    | cGFR    |          |    |        |        |    |
|-------------|--------|---------|----|--------|--------|----|---------|----------|----|--------|--------|----|
|             | Serum  |         |    | Urine  |        |    | Serum   |          |    | Urine  |        |    |
|             | Pears  | Spearm  | n  | Pears  | Spearm | n  | Pears   | Spearm   | n  | Pears  | Spearm | n  |
| ADP         | 0.360  | 0.100   | 15 | 0.055  | -0.041 | 22 | -0.864  | -1.000** | 4  | -0.013 | 0.235  | 10 |
|             | 0.188  | 0.723   |    | 0.809  | 0.855  |    | 0.136   |          |    | 0.971  | 0.514  |    |
| a1AGP       | 0.346  | 0.265   | 16 | -0.095 | -0.062 | 20 | -0.559  | -0.812*  | 6  | 0.024  | 0.192  | 9  |
|             | 0.189  | 0.322   |    | 0.692  | 0.796  |    | 0.249   | 0.05     |    | 0.952  | 0.620  |    |
| AGT         | -0.478 | -0.557* | 15 | -0.165 | -0.29  | 20 | 0.811   | 0.200    | 4  | -0.224 | -0.134 | 9  |
|             | 0.071  | 0.031   |    | 0.487  | 0.214  |    | 0.189   | 0.800    |    | 0.562  | 0.730  |    |
| CoIXIII     | -0.276 | -0.35   | 15 | 0.399  | 0.383  | 20 | -0.573  | -0.6     | 4  | 0.181  | .684*  | 9  |
|             | 0.319  | 0.201   |    | 0.081  | 0.095  |    | 0.427   | 0.4      |    | 0.641  | 0.042  |    |
| GS          | -0.448 | -0.582* | 15 | 0.095  | 0.062  | 20 | -0.342  | -0.600   | 4  | 0.214  | 0.494  | 9  |
|             | 0.094  | 0.023   |    | 0.690  | 0.796  |    | 0.658   | 0.400    |    | 0.581  | 0.177  |    |
| LRGP1       | -0.155 | -0.018  | 20 | .629** | .426*  | 22 | -0.448  | -0.527   | 9  | -0.021 | 0.046  | 10 |
|             | 0.514  | 0.940   |    | 0.002  | 0.048  |    | 0.227   | 0.145    |    | 0.953  | 0.899  |    |
| HABP2       | -0.101 | -0.021  | 15 | 0.404  | 0.055  | 20 | -0.915  | -0.800   | 4  | 0.45   | 0.492  | 9  |
|             | 0.720  | 0.940   |    | 0.077  | 0.818  |    | 0.085   | 0.200    |    | 0.225  | 0.179  |    |
| PICP        | 0.231  | 0.028   | 19 | -0.321 | -0.316 | 20 | -0.783* | -0.719*  | 8  | -0.312 | -0.164 | 11 |
|             | 0.342  | 0.909   |    | 0.167  | 0.175  |    | 0.022   | 0.045    |    | 0.351  | 0.629  |    |
| TGFB        | 0.092  | 0.205   | 19 | 0.160  | -0.026 | 22 | 0.176   | 0.443    | 8  | -0.497 | -0.618 | 10 |
|             | 0.709  | 0.399   |    | 0.478  | 0.908  |    | 0.677   | 0.272    |    | 0.144  | 0.057  |    |
| VTN         | -0.282 | -0.311  | 20 | -0.321 | -0.381 | 20 | 0.583   | -0.209   | 9  | -0.553 | -0.559 | 9  |
|             | 0.229  | 0.182   |    | 0.168  | 0.098  |    | 0.100   | 0.589    |    | 0.123  | 0.118  |    |
| C9          | -0.469 | -0.129  | 15 | -0.075 | -0.272 | 20 | 0.012   | -0.051   | 5  | -0.184 | -0.385 | 9  |
|             | 0.078  | 0.648   |    | 0.754  | 0.246  |    | 0.985   | 0.935    |    | 0.636  | 0.306  |    |
| C4BP        | -0.026 | 0.136   | 15 | 0.124  | 0.078  | 20 | -0.403  | -0.400   | 4  | -0.193 | -0.059 | 9  |
|             | 0.927  | 0.630   |    | 0.603  | 0.743  |    | 0.597   | 0.600    |    | 0.619  | 0.881  |    |
| CRP         | 0.243  | 0.099   | 22 | .711** | .564** | 20 | 0.141   | 0.505    | 10 | 0.064  | 0.587  | 11 |
|             | 0.276  | 0.662   |    | <.001  | 0.01   |    | 0.697   | 0.137    |    | 0.851  | 0.058  |    |
| LUM         | 0.421  | 0.500   | 3  | 0.827  | 0.5    | 3  |         |          | 0  |        |        | 0  |
|             | 0.724  | 0.667   |    | 0.380  | 0.667  |    |         |          |    |        |        |    |
| FMN         | 0.191  | 0.164   | 15 | 0.132  | 0.087  | 19 | -0.744  | -0.800   | 4  | 0.06   | 0.249  | 10 |
|             | 0.495  | 0.558   |    | 0.590  | 0.724  |    | 0.256   | 0.200    |    | 0.87   | 0.487  |    |
| CFH         | -0.087 | -0.245  | 11 | .509*  | 0.367  | 20 |         |          | 1  | 0.188  | 0.418  | 9  |
|             | 0.798  | 0.467   |    | 0.022  | 0.112  |    |         |          |    | 0.629  | 0.262  |    |
| CFI         | 0.213  | 0.189   | 15 | 0.089  | 0.189  | 20 | 0.329   | 0.051    | 5  | -0.087 | 0.162  | 9  |
|             | 0.447  | 0.499   |    | 0.708  | 0.425  |    | 0.589   | 0.935    |    | 0.824  | 0.678  |    |
| FGG         | -0.772 | -0.800  | 4  | 0.230  | 0.152  | 20 | 0.160   | 0.000    | 4  | 0.248  | 0.219  | 10 |
|             | 0.228  | 0.200   |    | 0.330  | 0.524  |    | 0.840   | 1.000    |    | 0.489  | 0.544  |    |
| C1q         | 0.169  | 0.100   | 15 | 0.418  | 0.368  | 12 | -0.622  | -0.800   | 4  | -0.626 | -0.800 | 4  |
|             | 0.546  | 0.723   |    | 0.177  | 0.240  |    | 0.378   | 0.200    |    | 0.374  | 0.200  |    |

### Graphical visualization of correlations considered as significant:

Urine CRP with eGFR

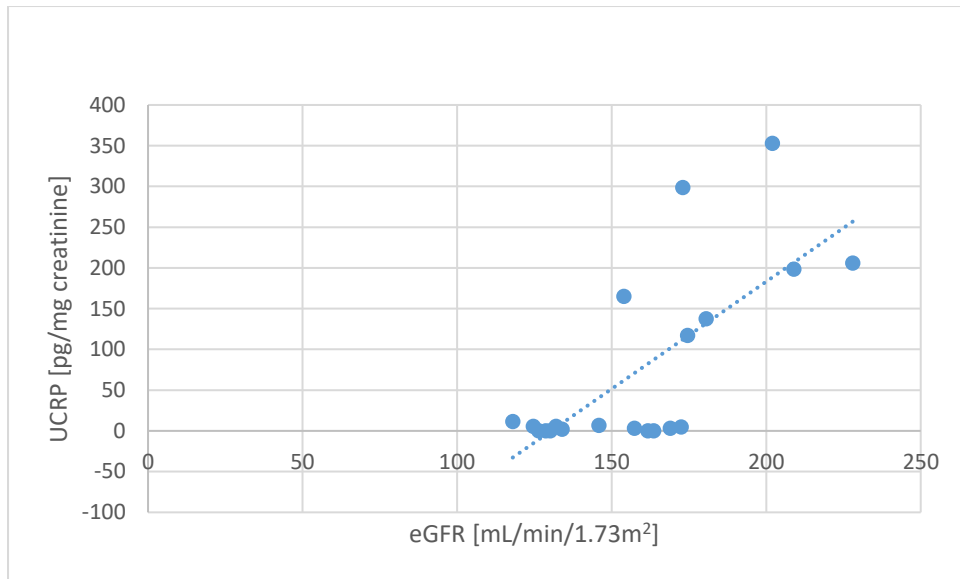

Serum PICP and HABP2 with cGFR.

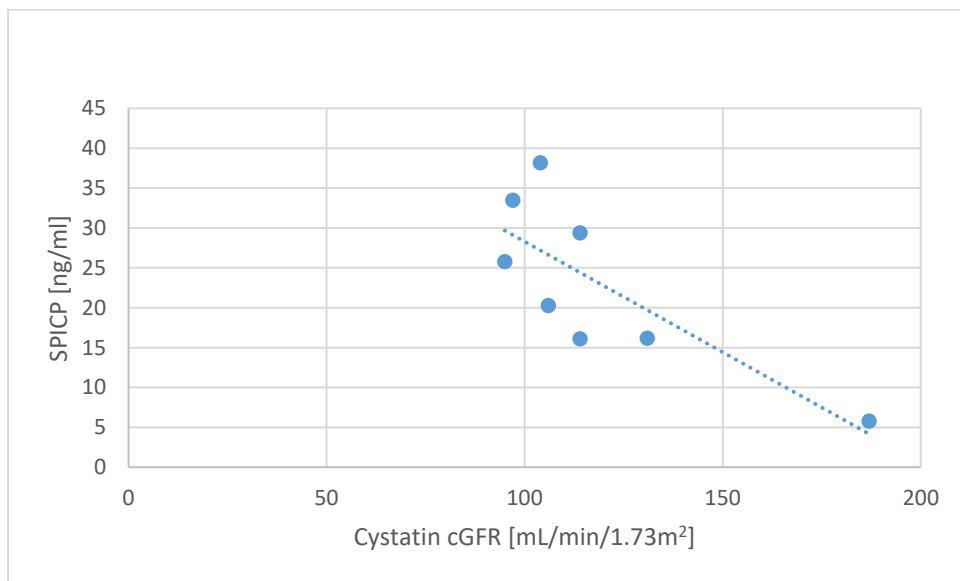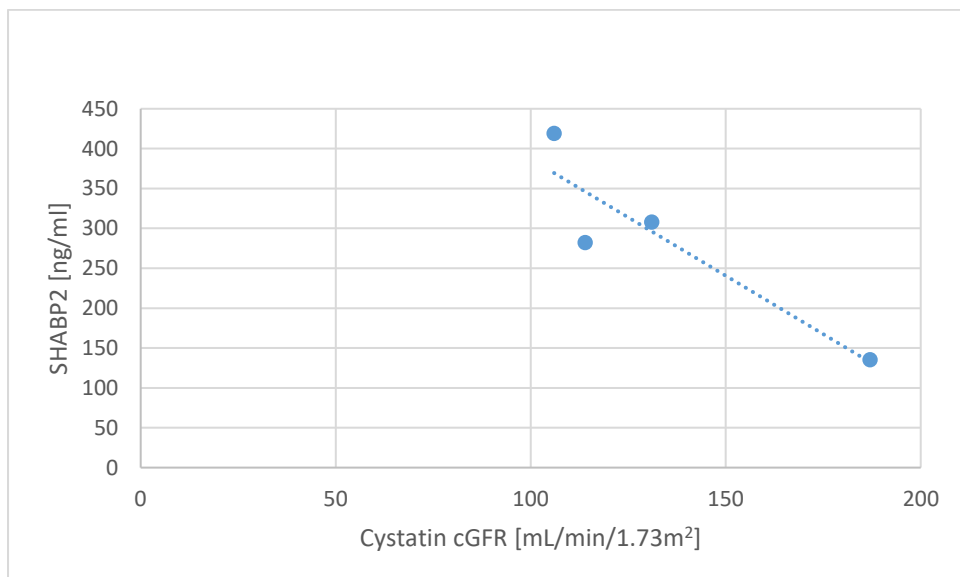



**Table S9: Correlation of serum and urinary BM candidates with serum CRP in patients with AS and similar diseases.**

| BM in→<br>↓    | Serum CRP       |                 |    |                 |                 |    |
|----------------|-----------------|-----------------|----|-----------------|-----------------|----|
|                | Serum           |                 |    | Urine           |                 |    |
|                | Pearson         | Spearman        | n  | Pearson         | Spearman        | n  |
| <b>ADP</b>     | -0.073<br>0.657 | -0.116<br>0.483 | 39 | -0.15<br>0.321  | -.340*<br>0.021 | 46 |
| <b>a1AGP</b>   | 0.221<br>0.277  | .454*<br>0.020  | 26 | -0.154<br>0.317 | -0.153<br>0.321 | 44 |
| <b>AGT</b>     | -0.208<br>0.204 | -0.028<br>0.864 | 39 | -0.284<br>0.061 | -.363*<br>0.015 | 44 |
| <b>ColXIII</b> | -0.081<br>0.625 | 0.138<br>0.401  | 39 | 0.06<br>0.697   | 0.157<br>0.307  | 44 |
| <b>GS</b>      | -0.056<br>0.736 | -0.104<br>0.530 | 39 | -0.213<br>0.165 | -0.274<br>0.072 | 44 |
| <b>LRGP1</b>   | 0.043<br>0.780  | .366*<br>0.013  | 45 | 0.237<br>0.112  | .379**<br>0.009 | 46 |
| <b>HABP2</b>   | 0.152<br>0.356  | 0.292<br>0.071  | 39 | -0.169<br>0.273 | -0.225<br>0.142 | 44 |
| <b>PICP</b>    | 0.226<br>0.140  | 0.241<br>0.115  | 44 | -0.137<br>0.392 | -.370*<br>0.017 | 41 |
| <b>TGFβ</b>    | 0.113<br>0.475  | .446**<br>0.003 | 42 | -0.061<br>0.689 | -.348*<br>0.018 | 46 |
| <b>VTN</b>     | -0.157<br>0.303 | -0.068<br>0.657 | 45 | -0.173<br>0.263 | -.312*<br>0.039 | 44 |
| <b>C9</b>      | -0.097<br>0.551 | 0.220<br>0.173  | 40 | -0.157<br>0.309 | -0.296<br>0.051 | 44 |
| <b>C4BP</b>    | 0.070<br>0.671  | 0.293<br>0.070  | 39 | -0.073<br>0.638 | 0.164<br>0.287  | 44 |
| <b>CRP</b>     | 1.000           | 1.000           | 47 | .592**<br><.001 | .450**<br>0.003 | 42 |
| <b>LUM</b>     | 0.339<br>0.133  | 0.106<br>0.646  | 21 | -0.282<br>0.228 | -0.298<br>0.202 | 20 |
| <b>FMN</b>     | -0.154<br>0.363 | -0.081<br>0.634 | 37 | -0.158<br>0.329 | -0.004<br>0.982 | 40 |
| <b>CFH</b>     | .638**<br>0.002 | 0.408<br>0.067  | 21 | 0.028<br>0.858  | 0.185<br>0.228  | 44 |
| <b>CFI</b>     | -0.070<br>0.738 | 0.192<br>0.359  | 25 | -0.097<br>0.529 | -0.068<br>0.662 | 44 |
| <b>FGG</b>     | -0.541<br>0.346 | -0.500<br>0.391 | 5  | -0.146<br>0.367 | 0.018<br>0.912  | 40 |
| <b>C1q</b>     | .381*<br>0.015  | .386*<br>0.014  | 40 | .869**<br><.001 | 0.328<br>0.059  | 34 |

**Graphical visualization of correlation considered as significant:**

Serum complement C1q with serum CRP. First samples

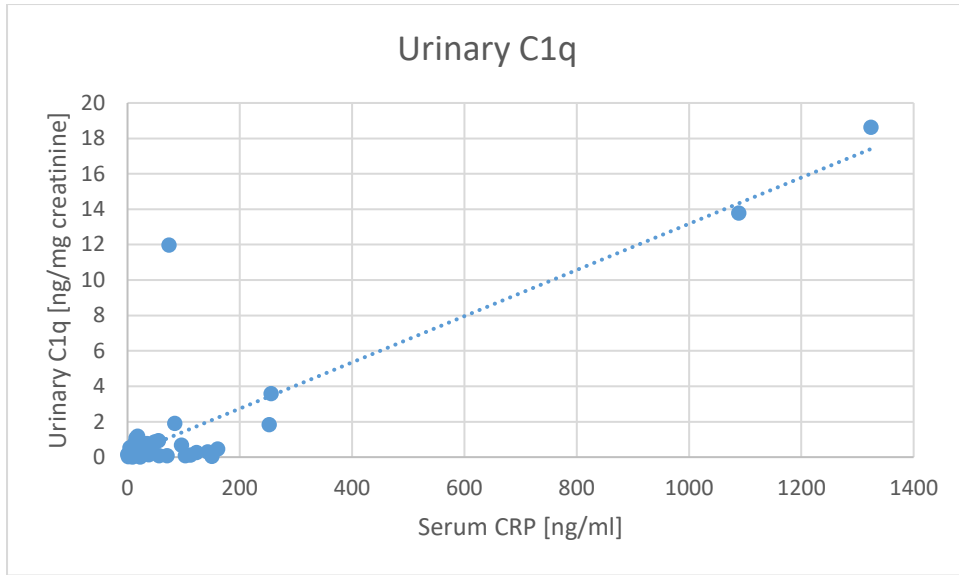

**Supplementary Table S10:**

**ROC analysis, comparison of patients with AS (set1, first visit) with controls**

| <b>BM</b>    | <b>Cut-off</b> | <b>Sensitivity</b> | <b>1-specificity</b> | <b>AUC</b> | <b>BM * BM</b>         | <b>Cut-off</b> | <b>Sensitivity</b> | <b>1-specificity</b> | <b>AUC</b> |
|--------------|----------------|--------------------|----------------------|------------|------------------------|----------------|--------------------|----------------------|------------|
| <b>Serum</b> |                |                    |                      |            |                        |                |                    |                      |            |
| ColXIII      | 3.55           | 0.800              | 0.167                | 0.821      |                        |                |                    |                      |            |
| GS           | 57.80          | 0.857              | 0.333                | 0.783      |                        |                |                    |                      |            |
| HABP2        | 343.5          | 0.727              | 0.250                | 0.766      |                        |                |                    |                      |            |
| PICP         | 14.55          | 0.909              | 0.250                | 0.909      |                        |                |                    |                      |            |
| TGFβ         | 30.19          | 0.939              | 0.167                | 0.960      |                        |                |                    |                      |            |
| C1q          | 20352          | 0.743              | 0.273                | 0.797      |                        |                |                    |                      |            |
| <b>Urine</b> |                |                    |                      |            |                        |                |                    |                      |            |
| ColXIII      | 0.85           | 0.735              | 0.163                | 0.859      | ColXIII * FMN          | 8.02           | 0.821              | 0.226                | 0.834      |
| LRGP1        | 2.01           | 0.853              | 0.163                | 0.882      | LRGP * C1q             | 0.54           | 0.833              | 0.179                | 0.896      |
| HABP2        | 0.25           | 0.793              | 0.233                | 0.805      | CFI * a1AGP            | 4.66           | 0.735              | 0.229                | 0.789      |
| C4BP         | 8.67           | 0.941              | 0.121                | 0.943      | C4BP * ColXIII         | 2.59           | 0.882              | 0.135                | 0.903      |
| CFH          | 21.72          | 1.000              | 0.162                | 0.975      | GS * CFH               | 805.9          | 0.824              | 0.214                | 0.896      |
| FGG          | 1197           | 0.786              | 0.198                | 0.801      | C9 * CFH               | 1773.3         | 0.794              | 0.153                | 0.889      |
| a1AGP        | 4.67           | 0.765              | 0.281                | 0.770      | CFH * FGG              | 46353          | 0.793              | 0.082                | 0.849      |
| CRP          | 5.36           | 0.800              | 0.172                | 0.845      | CFH * CFI              | 53.40          | 0.800              | 0.105                | 0.925      |
| C1q          |                |                    |                      | 0.812      | CRP * C1q              | 2.95           | 0.733              | 0.093                | 0.851      |
|              |                |                    |                      |            | C4BP * ColXIII * HABP2 | 0.66           | 0.794              | 0.105                | 0.855      |

ROC analysis by SPSS (cf. Methods section). Only BMs with AUC >0.700 are shown.

Concentration ranges of BMs: Serum: ColXII, HABP2, PICP, TGF- $\beta$ 1 and C1q, ng/mL, GS,  $\mu$ g/mL.

Urine: ColXIII, HABP2, C4BP, CFH, CFI, FGG, GS, LRGP1,  $\alpha$ 1AGP, and C1q, ng/mg creatinine; CRP, C9 and FMN, pg/mg creatinine.

| Section & Topic          | No  | Item                                                                                                                                                   | Reported on page #             |
|--------------------------|-----|--------------------------------------------------------------------------------------------------------------------------------------------------------|--------------------------------|
| <b>TITLE OR ABSTRACT</b> |     |                                                                                                                                                        |                                |
|                          | 1   | Identification as a study of diagnostic accuracy using at least one measure of accuracy (such as sensitivity, specificity, predictive values, or AUC)  |                                |
| <b>ABSTRACT</b>          |     |                                                                                                                                                        |                                |
|                          | 2   | Structured summary of study design, methods, results, and conclusions (for specific guidance, see STARD for Abstracts)                                 | 2                              |
| <b>INTRODUCTION</b>      |     |                                                                                                                                                        |                                |
|                          | 3   | Scientific and clinical background, including the intended use and clinical role of the index test                                                     | 3, there is no index test      |
|                          | 4   | Study objectives and hypotheses                                                                                                                        | 4                              |
| <b>METHODS</b>           |     |                                                                                                                                                        |                                |
| <i>Study design</i>      | 5   | Whether data collection was planned before the index test and reference standard were performed (prospective study) or after (retrospective study)     | n/a                            |
| <i>Participants</i>      | 6   | Eligibility criteria                                                                                                                                   |                                |
|                          | 7   | On what basis potentially eligible participants were identified (such as symptoms, results from previous tests, inclusion in registry)                 | 5, 8                           |
|                          | 8   | Where and when potentially eligible participants were identified (setting, location and dates)                                                         | 4, 7, 31                       |
|                          | 9   | Whether participants formed a consecutive, random or convenience series                                                                                |                                |
| <i>Test methods</i>      | 10a | Index test, in sufficient detail to allow replication                                                                                                  | n/a                            |
|                          | 10b | Reference standard, in sufficient detail to allow replication                                                                                          |                                |
|                          | 11  | Rationale for choosing the reference standard (if alternatives exist)                                                                                  | n/a                            |
|                          | 12a | Definition of and rationale for test positivity cut-offs or result categories of the index test, distinguishing pre-specified from exploratory         |                                |
|                          | 12b | Definition of and rationale for test positivity cut-offs or result categories of the reference standard, distinguishing pre-specified from exploratory |                                |
|                          | 13a | Whether clinical information and reference standard results were available to the performers/readers of the index test                                 |                                |
|                          | 13b | Whether clinical information and index test results were available to the assessors of the reference standard                                          |                                |
| <i>Analysis</i>          | 14  | Methods for estimating or comparing measures of diagnostic accuracy                                                                                    | 12                             |
|                          | 15  | How indeterminate index test or reference standard results were handled                                                                                | n/a                            |
|                          | 16  | How missing data on the index test and reference standard were handled                                                                                 |                                |
|                          | 17  | Any analyses of variability in diagnostic accuracy, distinguishing pre-specified from exploratory                                                      |                                |
|                          | 18  | Intended sample size and how it was determined                                                                                                         |                                |
| <b>RESULTS</b>           |     |                                                                                                                                                        |                                |
| <i>Participants</i>      | 19  | Flow of participants, using a diagram                                                                                                                  |                                |
|                          | 20  | Baseline demographic and clinical characteristics of participants                                                                                      | 6, 9, 29-31                    |
|                          | 21a | Distribution of severity of disease in those with the target condition                                                                                 | 29                             |
|                          | 21b | Distribution of alternative diagnoses in those without the target condition                                                                            | 30, 31                         |
|                          | 22  | Time interval and any clinical interventions between index test and reference standard                                                                 |                                |
| <i>Test results</i>      | 23  | Cross tabulation of the index test results (or their distribution) by the results of the reference standard                                            |                                |
|                          | 24  | Estimates of diagnostic accuracy and their precision (such as 95% confidence intervals)                                                                | 8, 11, 12, 37, Fig. 4, Table 6 |
|                          | 25  | Any adverse events from performing the index test or the reference standard                                                                            |                                |
| <b>DISCUSSION</b>        |     |                                                                                                                                                        |                                |
|                          | 26  | Study limitations, including sources of potential bias, statistical uncertainty, and generalisability                                                  | 16                             |
|                          | 27  | Implications for practice, including the intended use and clinical role of the index test                                                              |                                |
| <b>OTHER INFORMATION</b> |     |                                                                                                                                                        |                                |
|                          | 28  | Registration number and name of registry                                                                                                               |                                |
|                          | 29  | Where the full study protocol can be accessed                                                                                                          | 38                             |

---

## AIM

STARD stands for “Standards for Reporting Diagnostic accuracy studies”. This list of items was developed to contribute to the completeness and transparency of reporting of diagnostic accuracy studies. Authors can use the list to write informative study reports. Editors and peer-reviewers can use it to evaluate whether the information has been included in manuscripts submitted for publication.

---

## EXPLANATION

A **diagnostic accuracy study** evaluates the ability of one or more medical tests to correctly classify study participants as having a **target condition**. This can be a disease, a disease stage, response or benefit from therapy, or an event or condition in the future. A medical test can be an imaging procedure, a laboratory test, elements from history and physical examination, a combination of these, or any other method for collecting information about the current health status of a patient.

The test whose accuracy is evaluated is called **index test**. A study can evaluate the accuracy of one or more index tests. Evaluating the ability of a medical test to correctly classify patients is typically done by comparing the distribution of the index test results with those of the **reference standard**. The reference standard is the best available method for establishing the presence or absence of the target condition. An accuracy study can rely on one or more reference standards.

If test results are categorized as either positive or negative, the cross tabulation of the index test results against those of the reference standard can be used to estimate the **sensitivity** of the index test (the proportion of participants *with* the target condition who have a positive index test), and its **specificity** (the proportion *without* the target condition who have a negative index test). From this cross tabulation (sometimes referred to as the contingency or “2x2” table), several other accuracy statistics can be estimated, such as the positive and negative **predictive values** of the test. Confidence intervals around estimates of accuracy can then be calculated to quantify the statistical **precision** of the measurements.

If the index test results can take more than two values, categorization of test results as positive or negative requires a **test positivity cut-off**. When multiple such cut-offs can be defined, authors can report a receiver operating characteristic (ROC) curve which graphically represents the combination of sensitivity and specificity for each possible test positivity cut-off. The **area under the ROC curve** informs in a single numerical value about the overall diagnostic accuracy of the index test.

The **intended use** of a medical test can be diagnosis, screening, staging, monitoring, surveillance, prediction or prognosis. The **clinical role** of a test explains its position relative to existing tests in the clinical pathway. A replacement test, for example, replaces an existing test. A triage test is used before an existing test; an add-on test is used after an existing test.

Besides diagnostic accuracy, several other outcomes and statistics may be relevant in the evaluation of medical tests. Medical tests can also be used to classify patients for purposes other than diagnosis, such as staging or prognosis. The STARD list was not explicitly developed for these other outcomes, statistics, and study types, although most STARD items would still apply.

---

## DEVELOPMENT

This STARD list was released in 2015. The 30 items were identified by an international expert group of methodologists, researchers, and editors. The guiding principle in the development of STARD was to select items that, when reported, would help readers to judge the potential for bias in the study, to appraise the applicability of the study findings and the validity of conclusions and recommendations. The list represents an update of the first version, which was published in 2003.

More information can be found on <http://www.equator-network.org/reporting-guidelines/stard>.
